# Supplementary material
Source: PubMed Central journal article supplement (PMC4702951)
Supplement: pnas.1522301112.sapp.pdf [file pnas.1522301112.sapp.pdf]

## Supporting Information Appendix

### SI Materials and Methods

#### Construction of dexamethasone inducible MET1 silencing lines.

DNA fragments including two different regions of *MET1* gene (Fig. S2) were amplified from *Arabidopsis thaliana* genomic DNA by PCR using the following primers: FWDAttB1dxRNAimet1 $\alpha$  (5'-GGGG-ACA-AGT-TTG-TAC-AAA-AAA-GCA-GGC-TAA-gcc-cta-cat-ctc-aag-aag-tct-cctca-3'), REVAttB2dxRNAimet1 $\alpha$  (5'-GGG-GAC-CAC-TTT-GTA-CAA-GAA-AGC-TGG-GTA-aga-cat-cat-tgc-ttg-cttg-tat-aat-gag-3'), FWDAttB1dxRNAimet1 $\beta$  (5'-GGGG-ACA-AGT-TTG-TAC-AAA-AAA-GCA-GGC-TAA-tcc-tca-aca-cca-acc-cta-gata-3') and REVAttB2dxRNAimet1 $\beta$  (5'-GGG-GAC-CAC-TTT-GTA-CAA-GAA-AGC-TGG-GTA-tca-atc-cga-ata-cgg-aat-atac-3'). The respective purified PCR products were cloned in pDONR221 and transferred into pOpOff2Hyg with a CaMV 35S-LhGR cassette on the same T-DNA, a GUS reporter gene fused to the RNAi construct was also present in the T-DNA to allow monitoring of the dexamethasone inducible expression, as well as a hygromycin resistance construct as a selectable marker gene (1). The resultant vectors were used for *Agrobacterium*-mediated transformation of *Arabidopsis* ecotype Col0 plants as previously reported (2). Transgenic plants carrying these constructions were selected in Hygromycin containing selective media; plants with 3:1 segregation rates corresponding to single insertions were selected to produce homozygous lines.

#### Handling of DNA methylation and demethylation mutants

F1 *ddc* and *rdd* plants were utilized in all experiments to avoid possible transgenerational epigenetic effects such as those reported for *ddc* in which widespread transposon activation (3). Homozygous *ddc* triple mutants with the reported curled leaf phenotype were genotyped; *rdd* triple mutants were also genotyped before experiments. Homozygous Inducible RNAi lines were used for all experiments, to induce *MET1* silencing in solid MS media seeds were grown in MS with 10  $\mu$ M dexamethasone. Dexamethasone was reapplied every 4 days directly to seedlings with a previously sterilized small brush. In liquid medium, seedlings were germinated in MS with 10  $\mu$ M dexamethasone and dexamethasone was reapplied every 4 days. To avoid unwanted cumulative DNA methylation alterations due loss of *MET1* we did not further propagated RNAimet1 plants that were in any moment induced with dexamethasone.

#### Isolation of Plant Nuclei

Plant nuclei were purified as previously described (4) with the following modifications: enough fresh MEB buffer (1M 2-methyl-2,4-pentadienol, 2% PVP-10, 10 mM PIPES-KOH, 10 mM Sodium Metabisulfite, 10 mM MgCl<sub>2</sub>, 200 mM L-Lysine, 6 mM EGTA, 0.5% Triton X-100) was added to moisten 10 g of frozen tissue powder, to homogenize 1 extra volume of MEB buffer was added and then vortex thoroughly. The sample was filtered through 3 layers of Polyester/Nylon cloth (Reusable wipes, Scotch Brite), 2 layers of HydroKnit (Kimberly-Clark), and one layer of 60  $\mu$ m Nylon NET Filter (Millipore) and centrifuged at 8500 rpm for 5 minutes at 4°C. The supernatant was discarded and the nuclei pellet was carefully resuspended in 30 mL of MEB buffer until

pellet is completely resuspended, and then centrifuged at 8500 for 5 minutes. These washes were repeated three more times. After the washes, nuclei pellet was used for DNA isolation using the CTAB DNA extraction protocol. Typically DNA yields ranged between 5-10 µg from 10 g of tissue.

### **MethylC-Seq library construction and sequencing**

DNA was fragmented to 100-300 bp using a Sonicator (Covaris), then DNA fragments were blunt ended and, a dA 3'-end addition was performed prior to sequencing adapter ligation. Illumina methylated adapters were used according to the manufacturer's instructions (Illumina). The bisulfite conversion of arabidopsis DNA was carried out using ZYMO EZ DNA Methylation-Gold kit and amplified by 12 cycles of PCR. High-throughput pair-end sequencing was carried out using the Illumina Genetic Analyzer (GA2) according to manufacturer instructions. Raw GA sequencing data were processed by Illumina base-calling pipeline (SolexaPipeline-1.0).

### **Processing of MethylC-Seq Reads and Identification of Methylated Cytosine Positions**

Pair end reads generated by Illumina sequencing were aligned to the Col-0 TAIR10 Arabidopsis thaliana genome, as well as the cl857 Sam7 Lambda genome (48,502 bases) using SOAP2 software. MethylC-Seq reads for each biological replicate were processed and aligned independently as previously reported (5). Identification of methylated cytosine positions for each biological replicate was performed independently as described previously (6). The bisulfite conversion rates in all cases were greater than 99.6% (Table S1).

### **Identifying Differentially Methylated Cytosines**

For all positions considered to contain methylated cytosines (see previous paragraph) we performed the following analyses: The contingency table formed by the counts of methylated and non-methylated cytosines was evaluated for the significance of treatments by the F test, formed by the likelihood ratio tests between and within treatments. If the P-value of the F test was  $\alpha \leq 0.05$  and the data were not sparse (less than 5 zeroes in the contingency table), then a logistic model including all factors (P, O, T) and their interactions was fitted ("full" or "saturated" model). With this model we evaluated if at least one of the factors or interactions was significantly affecting the proportion of methylation and determine a factorial DmCs when the model was significant at  $P \leq 0.05$  (Fig. S13). We also fitted logistic models varying a single factor (P, O or T) while the other two remained constant; for example, varying P (HP or LP) in O = root at time = 7 dat. These  $3 \times 2 \times 2 = 12$  models were fitted relaxing the stringency of the F test to  $\alpha \leq 0.10$ , and only when the data were not sparse (Fig. S14). If the P-value for one of these models is  $P \leq 0.05$ , we have evidence of DmCs for the single factor tested when the other two are at fixed values.

### **Identification and construction of Differentially Methylated Regions**

Differentially methylated Regions (DMRs) were defined as regions in the Arabidopsis genome where DmC density was higher than genome wide DmC density. DMRs are defined for each phosphate contrast (Tables S8 and S9), and thus contain DmCs defined by the corresponding model, where the F test has  $\alpha \leq 0.1$  and the P value of the model was  $\alpha \leq 0.05$  (see previous

paragraph). Two parameters determine a DMR, the minimum number of DmCs that the DMR must contain, fixed here to four, and the maximum distance between neighboring DmCs within the DMR. To determine the maximum distance between neighboring DmCs, we calculated the number of DMRs that will be obtained as function of this distance,  $d^*$ . The maximum number of DMRs for each contrast was obtained between 800 and 1300 bp, but for the majority of the cases the value of  $d^*$  which resulted in more DMRs was 1000 bp (Fig. S15). Thus, DMRs in Table S9 are defined as regions in the genome where there are at least 4 DmCs with a maximum distance between neighboring DmCs of 1000 bp.

### **Mapping and Processing of mRNA-Seq Reads**

RNA-Seq reads generated with the Illumina analysis pipeline (fastQ format) were assessed the quality with FastQC (version 0.10.1) and processed using Perl scripts to remove reads that contained adapter sequences and low quality reads. The paired-end clean reads were aligned to the Arabidopsis thaliana TAIR10 reference sequence using Bowtie2 v2.1.0 (7). The raw counts, per gene were estimated by HTseq v0.5.4 (8). The data were normalized in edgeR v3.9.16 (9) using the trimmed mean of M values (TMM) method. Only genes with  $\geq 5$  reads in total, across all samples, were included in the final analysis. The normalized raw counts per gene were used to identify genes that were differentially expressed between samples using edgeR package using a 5% FDR cutoff.

### **Analysis of association between differential methylation and differential expression**

To obtain a correlation between methylation changes and differential expression of PSR genes, we first associated DmCs and DMRs to genomic regions using TAIR 10 Annotation. DMRs mapped to genomic regions were filtered in function of methylation direction (hypermethylation, hypomethylation) to select only loci with consistent methylation change marks. As we also mapped DmCs that did not score for our arbitrary minimum DmC number for DMR construction, we determined more stringent handling of these DmCs, these DmCs were filtered 1) by using a more stringent F-Test P-value ( $\alpha \leq 0.05$ ) than those used to generate DMRs ( $\alpha \leq 0.1$ ), 2) Scoring only DmCs with the same methylation direction in case of overlapping with DMRs or loci with assigned DMRs.

Once DMRs and DmCs were mapped to specific loci, we searched for loci that were associated with both differential methylation changes and differential expression in the same phosphate contrasts. Loci identified this approach were subjected to a detailed analysis to categorized genomic region in which the methylation changes occurred, level and direction of differential expression change (upregulated, downregulated) and the direction of methylation change (hypermethylation, hypomethylation) (Tables S4 and S5).

### **Functional categories enrichment**

Gene lists were generated with the resulting *Arabidopsis thaliana* IDs from the association analysis described above. These lists were processed in MySQL to eliminate repetitive *loci*, and then analyzed in the webtool VirtualPlant 1.3 (<http://virtualplant.bio.nyu.edu/cgi-bin/vpweb/>) (10) using the BioMaps tool ( $P \leq 0.01$ ) for find enrichment of functional categories. In this way groups of genes that are significantly over-represented were identified. In each case, the hypergeometric distribution was used to assess overrepresentation. To select the functional categories that were significant and over-represented we use a cut point in a normalized frequency ( $NF = \text{Relative frequency of set} / \text{Relative frequency of reference}$ ) that was greater than or equal to 1.5 Fold (Table S3).

### **Sequencing Datasets Visualization using the EPIC-CoGe Genome**

#### **Browser.**

Whole genome methyl cytosine positions (mCs) profiling for all phosphate treatments, DMRs and DmCs mapped to the TAIR10 reference sequence, gene models, and functional genomic elements were visualized using the EPIC-CoGe genome browser (11). All these datasets can be viewed in the EPIC-CoGe browser at: <https://goo.gl/iP6zER>

## Supplementary Definitions and Abbreviations

**Methylation context:** Methylation context refers to the specific sequence context in which a methylated cytosine is located, in plants this DNA methylation modification is applied in three different sequence contexts (CG, CHG and CHH, where H= A, C or T), context also can be defined as CG context (CG) and non-CG context (CHG and CHH).

**Methylation change:** Methylation change is defined as any change in the DNA methylation status of a specific cytosine position or a genomic region, namely changes in the methylation levels. These DNA methylation changes can be classified in function of the direction of the methylation change as either the result of an increase (hypermethylation) or a decrease (hypomethylation) of DNA methylation levels.

**Differentially methylated cytosine (DmC):** A differentially methylated cytosine is a cytosine position in which a significant DNA methylation change occurred in response to an environmental or developmental factor. DmCs can be further classified in function of the methylation context (DmCGs, DmCHGs and DmCHHs) or in function of the methylation change direction (hyper-DmCs and hypo-DmCs).

**Differentially methylated region (DMR):** A differentially methylated region is defined as a cluster of DmCs in which methylation patterns are significantly affected in response to environmental or developmental factors. DMRs can be classified in function of the methylation change direction (hyper-DmCs and hypo-DmCs).

**Gene-related differential methylation:** Gene-related differential methylation refers to changes in methylation patterns that occur inside features as upstream, gene body and downstream regions associated to a specific gene. Transposable elements adjacent to or within genes are also considered as Gene-Related (GR-TEs).

**Low phosphate differentially methylated DEGs (Pi-methDEGs):** Low phosphate differentially methylated DEGs are referred as Low Pi starvation responsive genes that are differentially methylated in response to LP conditions, these Pi-methDEGs can present overlap with DMRs or individual DmCs within Gene-related regions.

**P factor DmCs (Pf-DmCs):** P factor DmCs are exceptionally significant DmCs strongly associated to DNA methylation in response to changes in the phosphate status, these Pf-DmCs are the result of the analysis of a complete 2 x 2 x 2 factorial experiment.

**P factor differentially methylated DEGs (Pf-methDEGs):** P factor differentially methylated DEGs are defined as Pi-methDEGs that overlap with at least one Pf-DmC.

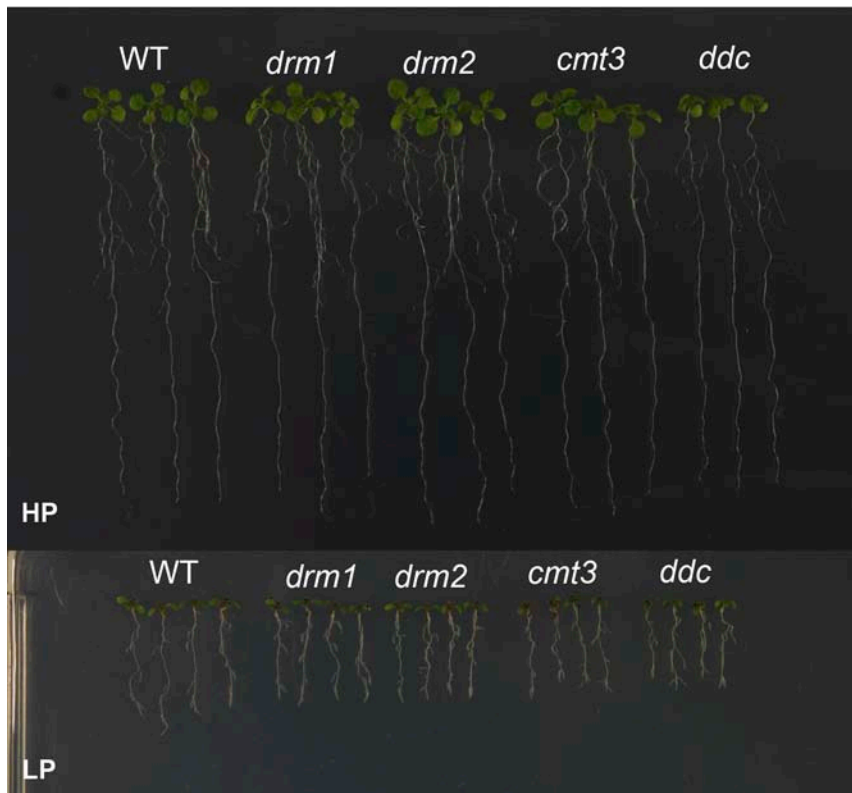

**Fig. S1. Arabidopsis non-CG methylation mutants show alterations in the root responses to low Pi availability.** Seedlings were grown for 14 d on medium with 1 mM Pi (HP) and 5  $\mu$ M Pi (LP). Seedlings growing in 1 mM Pi (HP) are shown in the upper panel and seedling growing the 5  $\mu$ M Pi (LP) are shown in the lower panel.

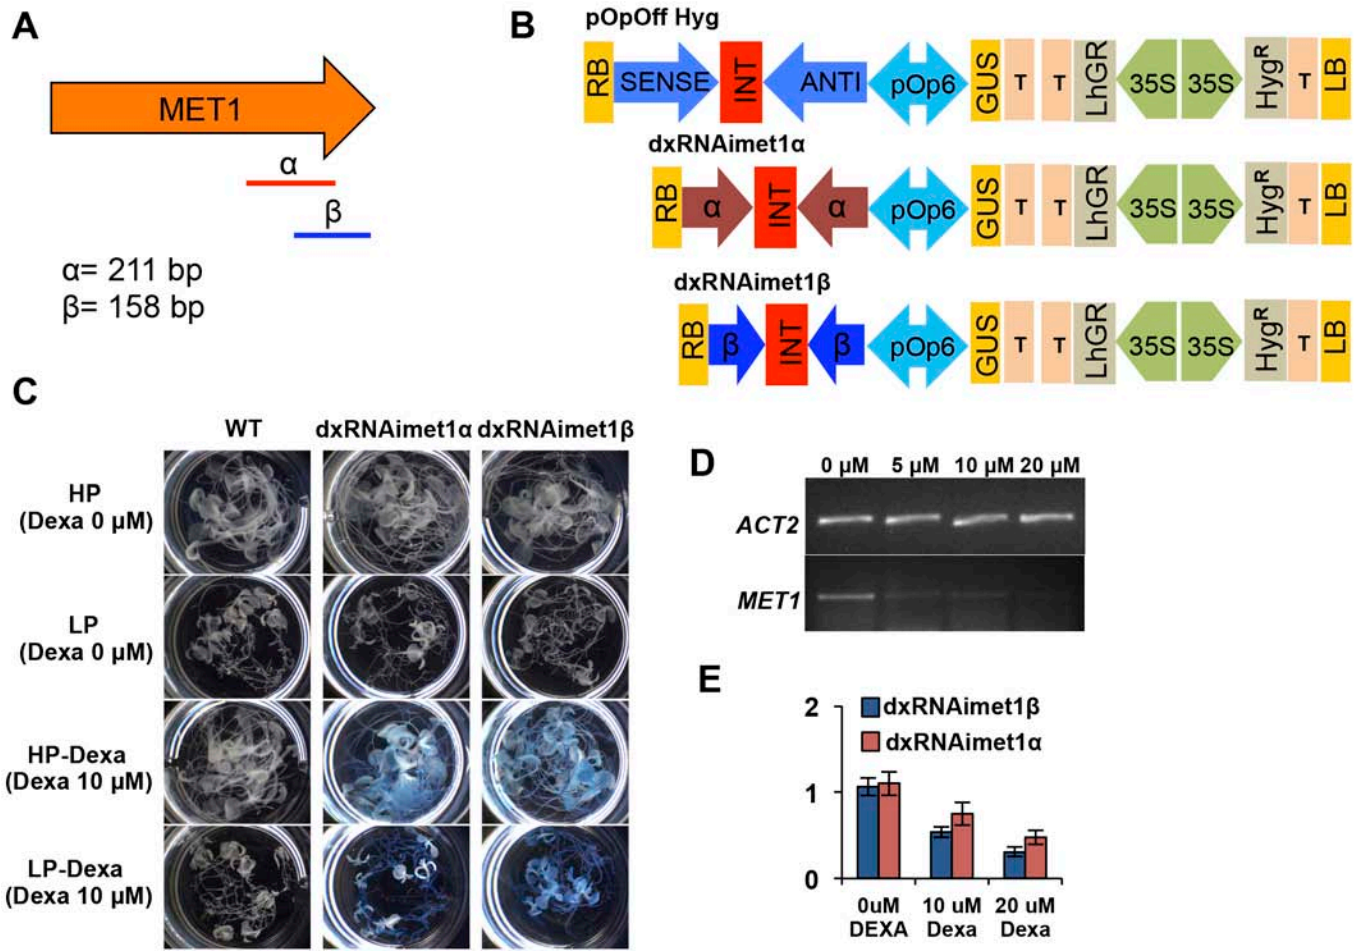

**Fig. S2. Design and characterization of dxRNAiMET1 inducible mutants.** A) Relative position and fragment size of  $\alpha$  and  $\beta$  versions of *MET1* RNAi. B) Backbone of original pOpOff Hyg vector and dxRNAimet1 $\alpha$  and dxRNAimet1 $\beta$  constructs. C) Analysis of GUS reporter gene induction; Seedlings were grown for 14 d on liquid MS medium with 1 mM Pi (HP) and 5  $\mu$ M Pi (LP) in hydroponics systems, for induction of GUS reporter gene 10  $\mu$ M dexamethasone was supplied to both phosphate treatments (HP-Dexa, LP-Dexa). D) RT-PCR of *MET1* transcript in dxRNAimet1 $\beta$  mutant RNA supplied with different dexamethasone concentrations (0, 5, 10 and 20  $\mu$ M), *ACT2* was used as internal control. E) qRT-PCR of *MET1* transcript in dxRNAimet1 $\alpha$  and dxRNAimet1 $\beta$  mutants induced with 0,10 and 20  $\mu$ M dexamethasone.

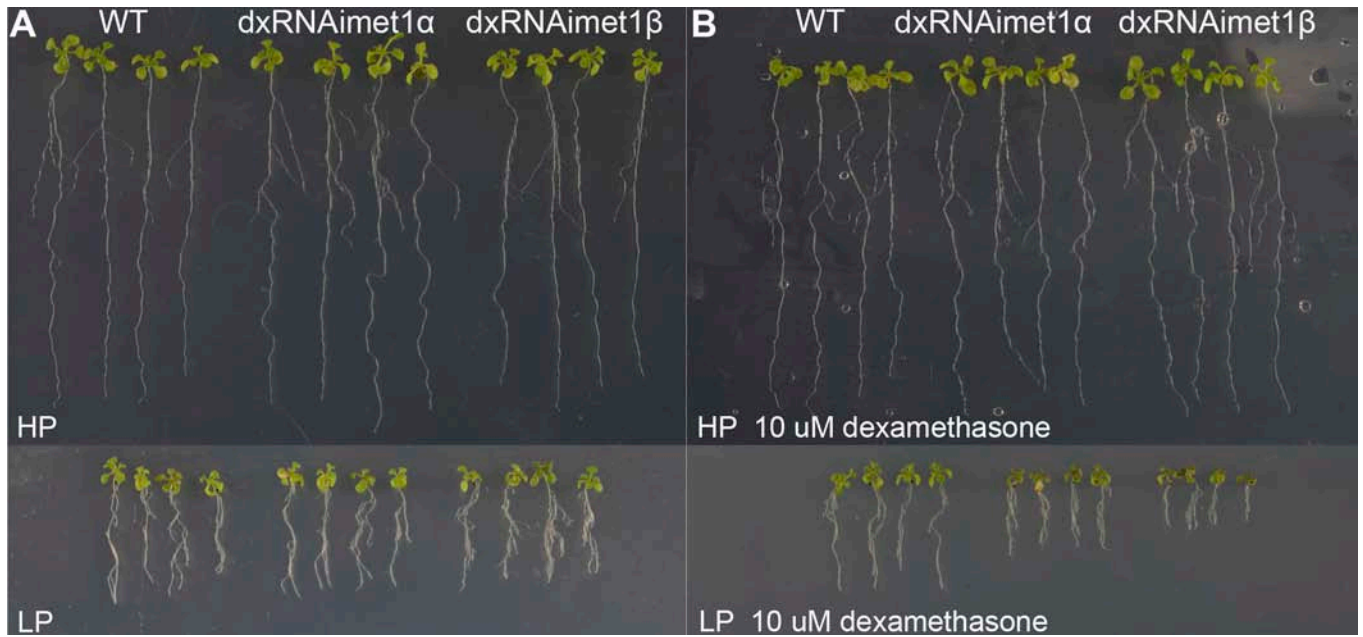

**Fig. S3. Arabidopsis dxRNAiMET1 lines show alterations in Pi starvation morphologic responses.** A) Seedlings were grown for 14 d on MS medium with 1 mM Pi (HP) and 5 μM Pi (LP). B) Seedlings were grown for 14 d on MS medium with 10 μM dexamethasone and 1 mM Pi (HP-dexa) and 5 μM Pi (LP-dexa), 10μM dexamethasone was resupplied every 4 days. The phenotypes of the RNAi lines and WT controls in 1 mM Pi (HP) is shown in the upper picture of each panel and the phenotypes of seedlings grown in 5 μM Pi (LP) are shown in the lower picture of each panel.



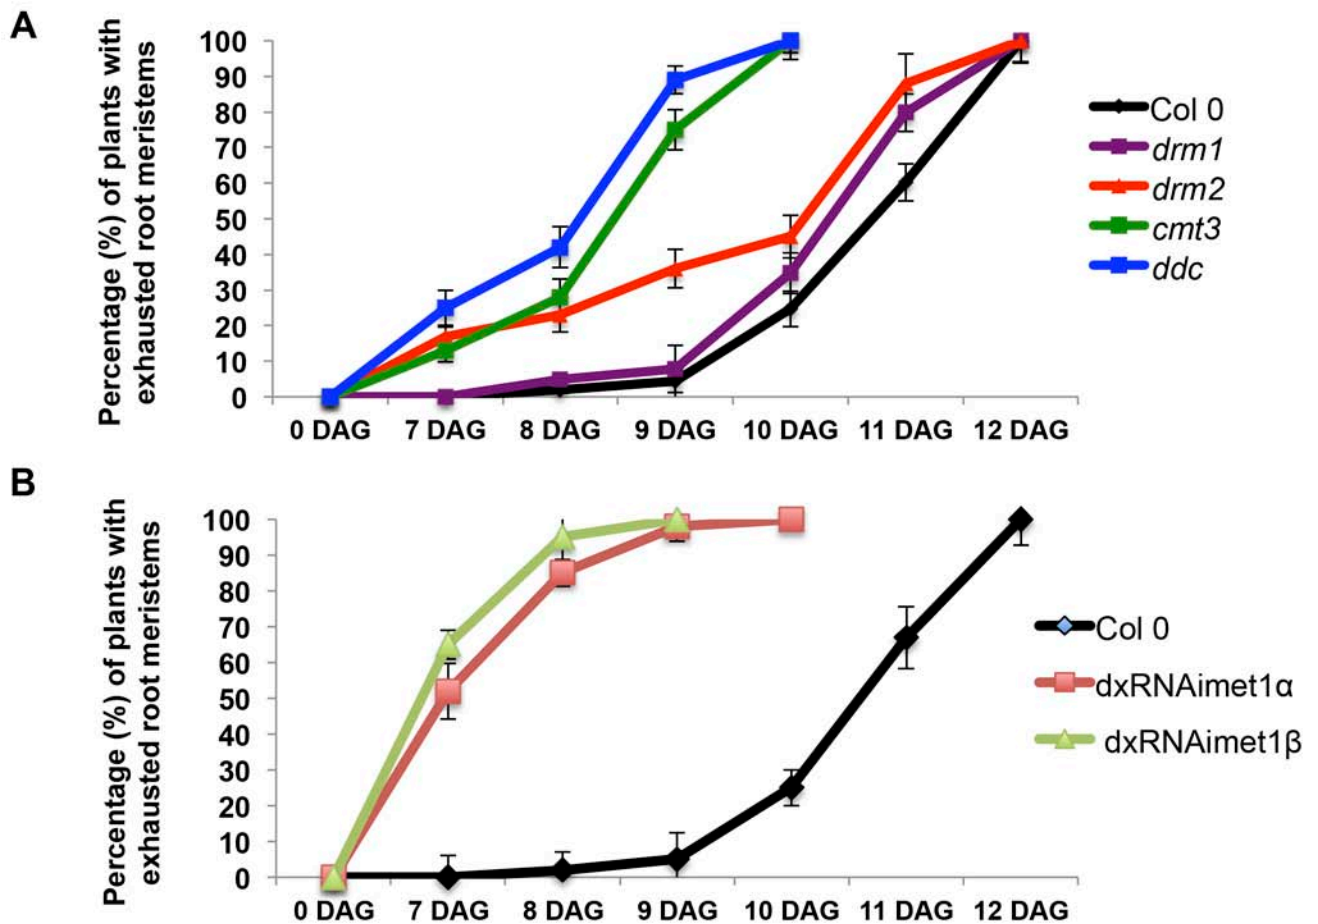

**Fig. S4. DNA methylation mutants show premature meristem exhaustion in  $-Pi$ .** A) Quantitative analysis of root meristem exhaustion events in non-CpG DNA methylation mutants (*drm1*, *drm2*, *cmt3* and *ddc*) grown under phosphate starvation. B) Quantitative analysis of root meristem exhaustion events in *dxRNAimet1* inducible mutants grown under phosphate starvation in the presence of 10  $\mu$ M dexamethasone. We established meristem exhaustion event supported on cell parameters such as the development of root hairs, cell disorganization and differentiated protoxylem in the primary root meristem. Values are the mean  $\pm$  SD from six biological replicates (N = 20, with two technical replicates each).

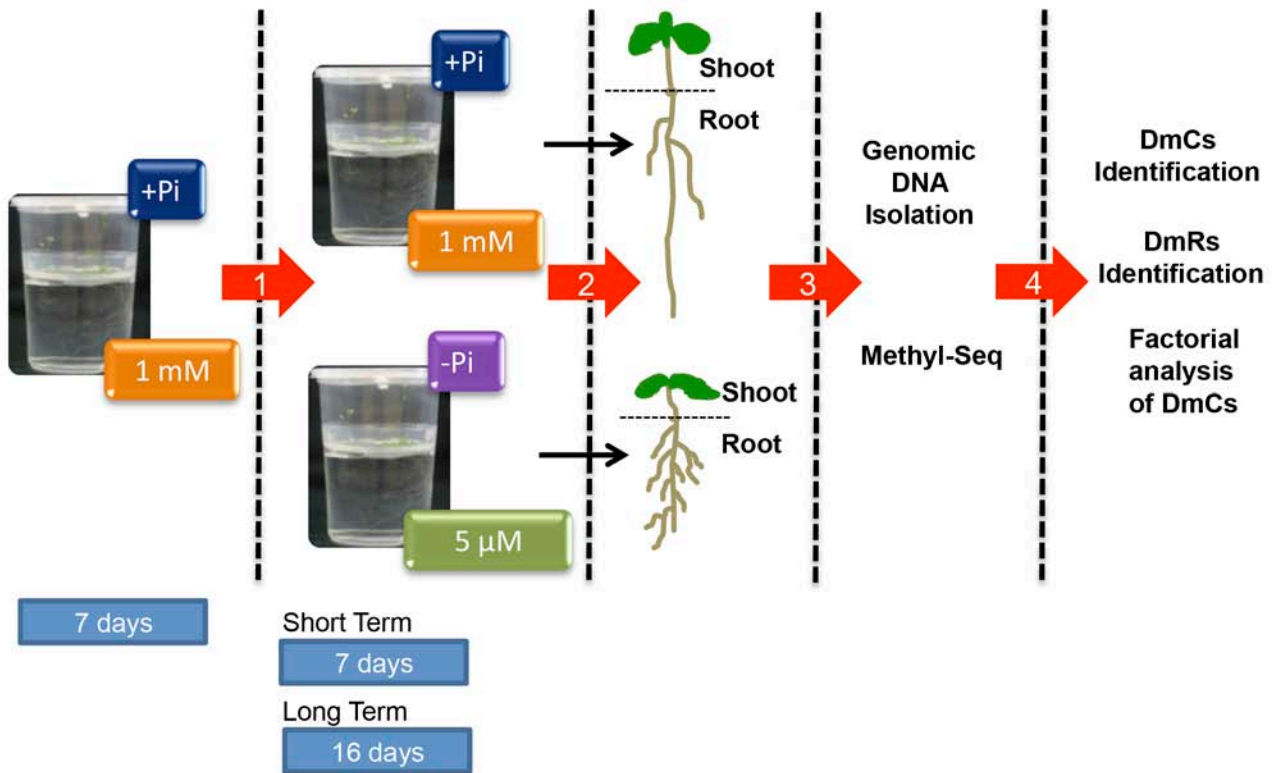

**Fig. S5. General approach used to identify Pi Starvation-induced genome-wide changes in cytosine methylation.** Plants were grown initially for 7 days in HP hydroponic medium. 1) Plants were transferred to fresh HP or LP media for 7 days or 17 days. 2) HP and LP treated seedlings were collected and shoot and root organs were separated for DNA Isolation. 3) High-throughput sequencing of bisulfite-treated genomic DNA was performed. 4) Methyl-Seq reads were mapped and whole genome mC profiling was calculated, differential methylation (DmC) levels were determined at each methylcytosine for each phosphate contrast (LP vs HP, e.g.  $-Pi_t$  Shoot 7 dat. VS  $+Pi_t$  Shoot 7 dat), DMRs were calculated for either hypermethylated or hypomethylated DmCs sets and finally a factorial analysis of DmCs was performed.

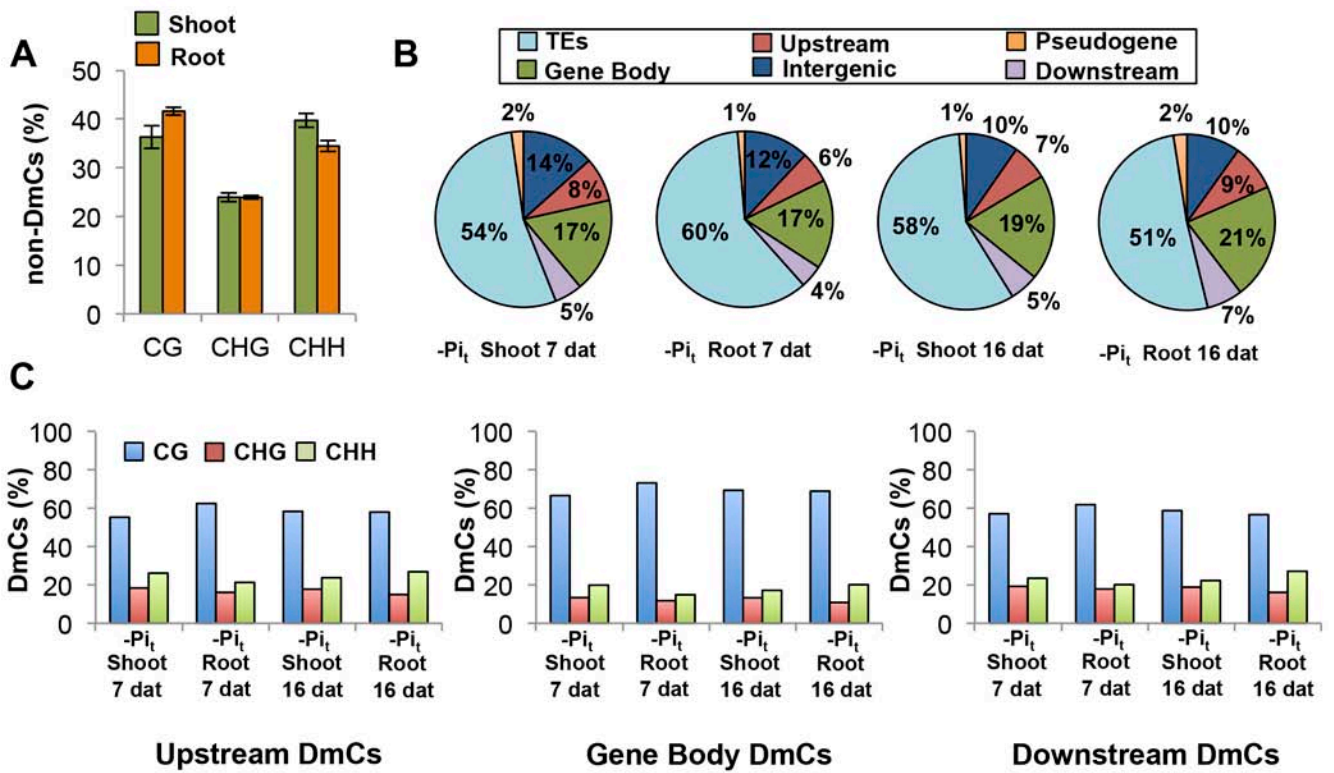

**Fig. S6. Detailed methylation Context Cut-off and Distribution among genomic features of Gene Related DmCs.** A) Context Cut-off of root and shoot libraries. B) Mapping of DmCs to genomic features by phosphate contrast. C) Methylation context distribution of Gene Related DmCs (upstream, gene body and downstream regions) by phosphate contrast.

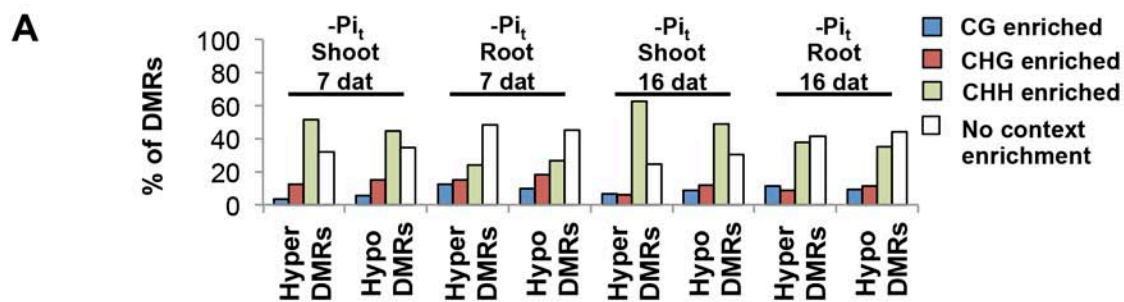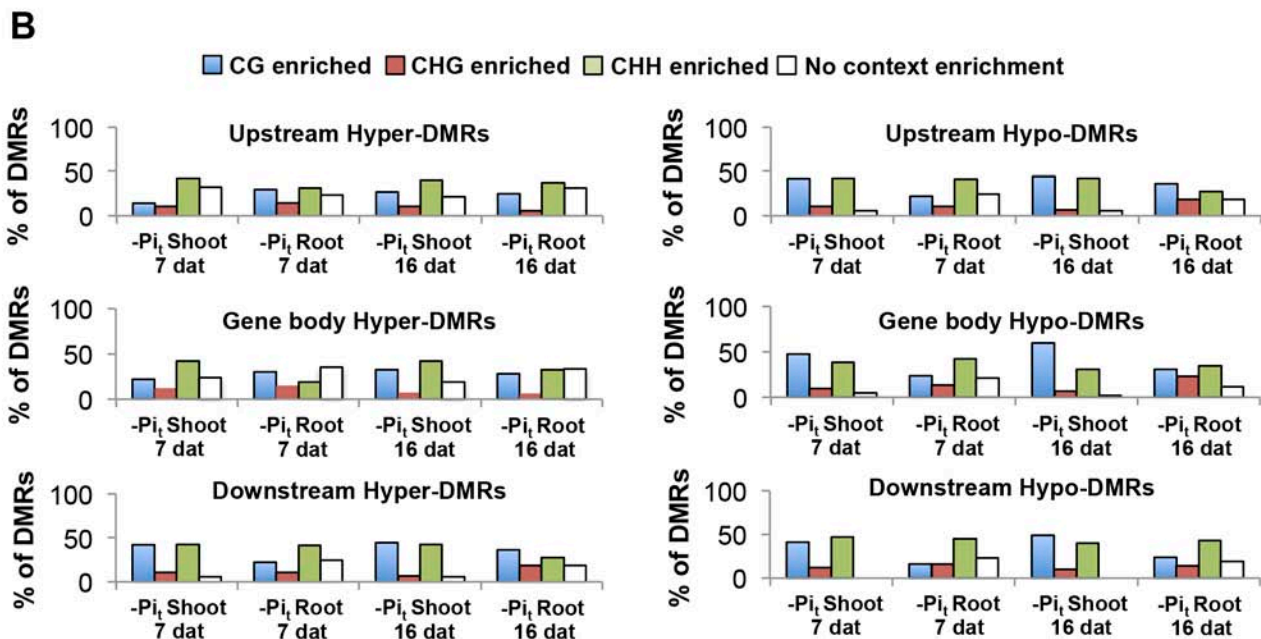

**Fig. S7. Detailed Analysis of DMR methylation context enrichment.** A) Context enrichment of total Hyper and Hypo DMRs for each individual phosphate contrast. B) Context enrichment of Gene Related hypomethylated and hypermethylated DMRs, in upstream, gene body and downstream regions by phosphate contrast.

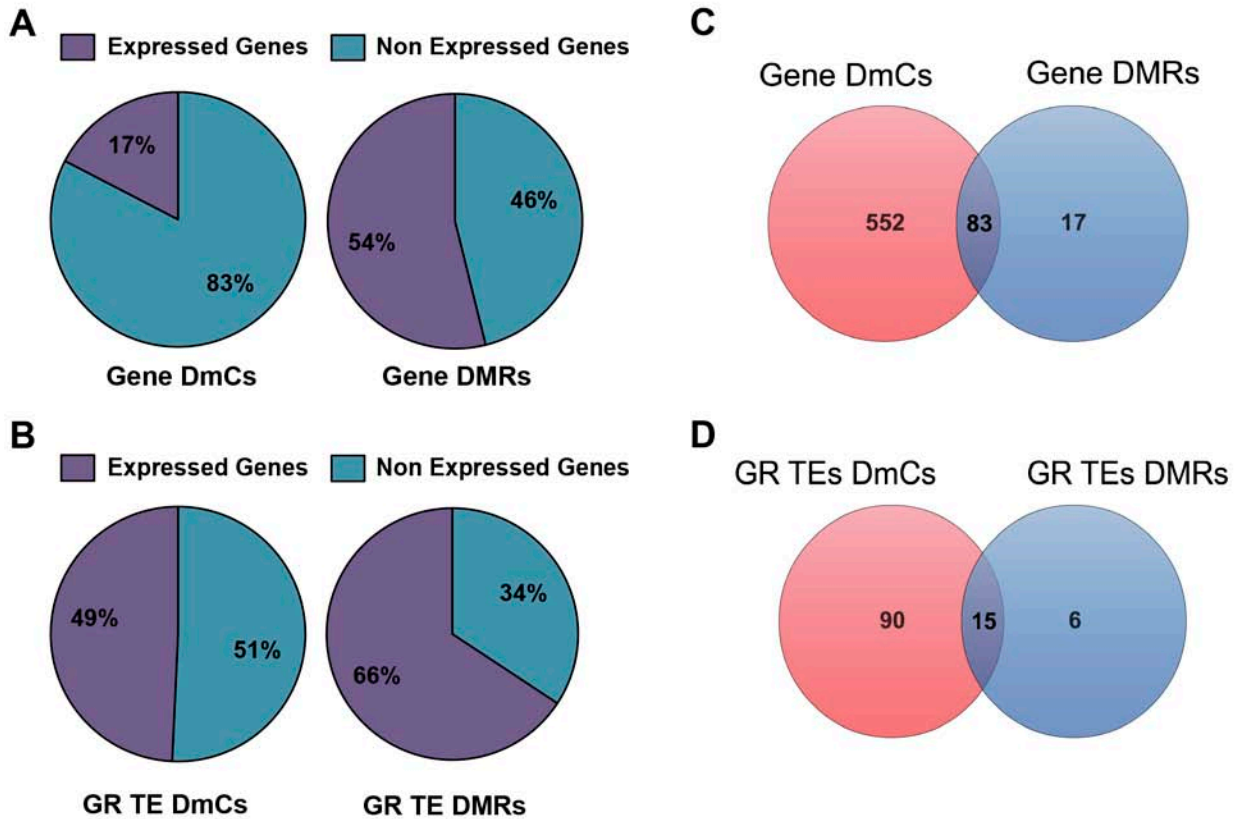

**Fig. S8. Distribution of DmCs and DMRs between Expressed and Non-Expressed Genes.** A) Percent cut-off of Genic DmCs and DMRs among Expressed genes and Non-Expressed Genes. B) Percent cut-off of Gene Related Transposable Elements (GR TEs) DmCs and DMRs between Expressed genes and Non-Expressed. C) Venn Diagram showing the distribution of differentially methylated loci between Gene DmCs and DMRs. D) Venn Diagram showing the distribution of differentially methylated loci between GR TEs DmCs and DMRs.

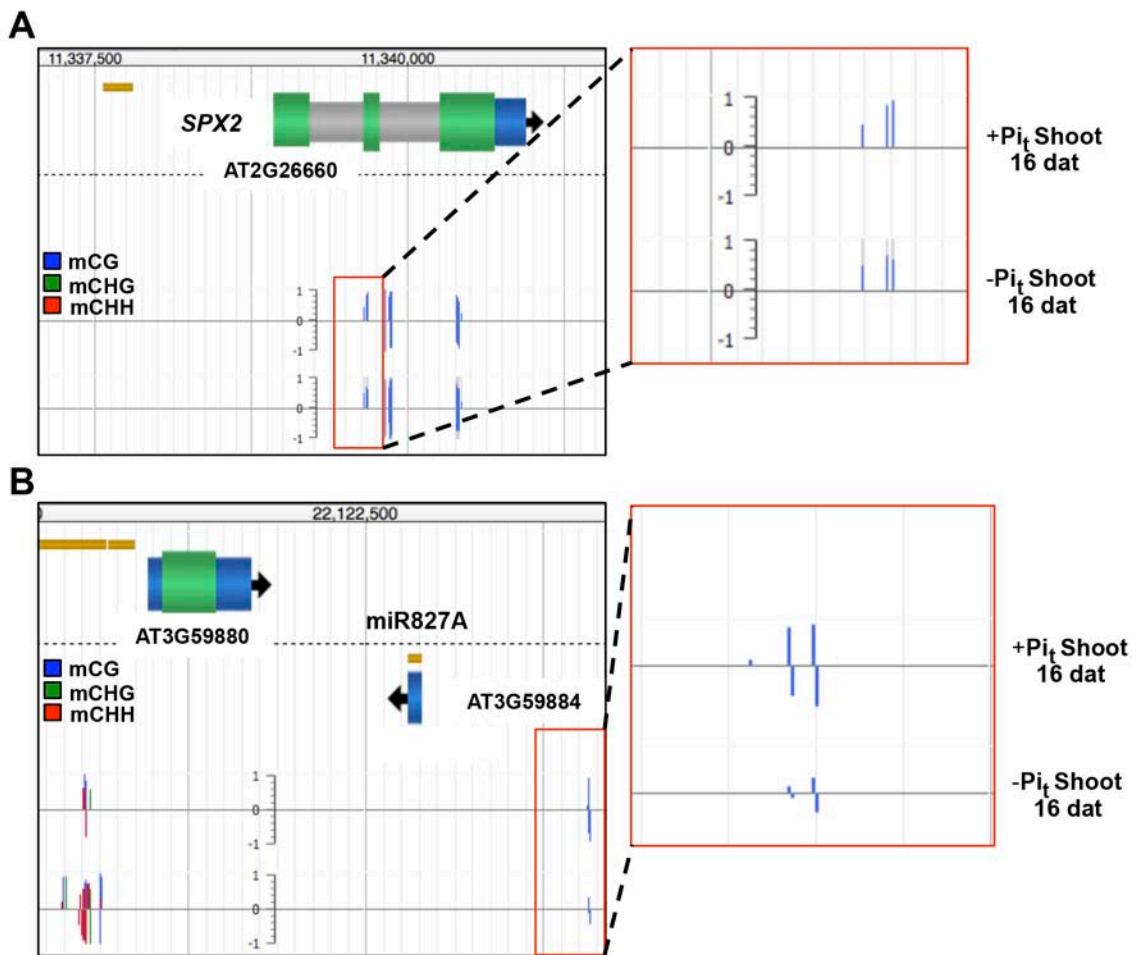

**Fig. S9. Genome browser visualization of methylation profiling of Arabidopsis *SPX2* and *miRNA827A* genes.** A) Genome browser screen shot from Arabidopsis *SPX2* locus, DNA methylation patterns during HP (+Pi<sub>t</sub> Shoot 16 dat) and LP (-Pi<sub>t</sub> Shoot 16 dat) conditions, zoom of differentially methylated zone is displayed on the right. A) Genome browser screen shot from Arabidopsis *miRNA827A* locus, DNA methylation patterns during HP (+Pi<sub>t</sub> Shoot 16 dat) and LP (-Pi<sub>t</sub> Shoot 16 dat) conditions, zoom of differentially methylated zone is displayed on the right.

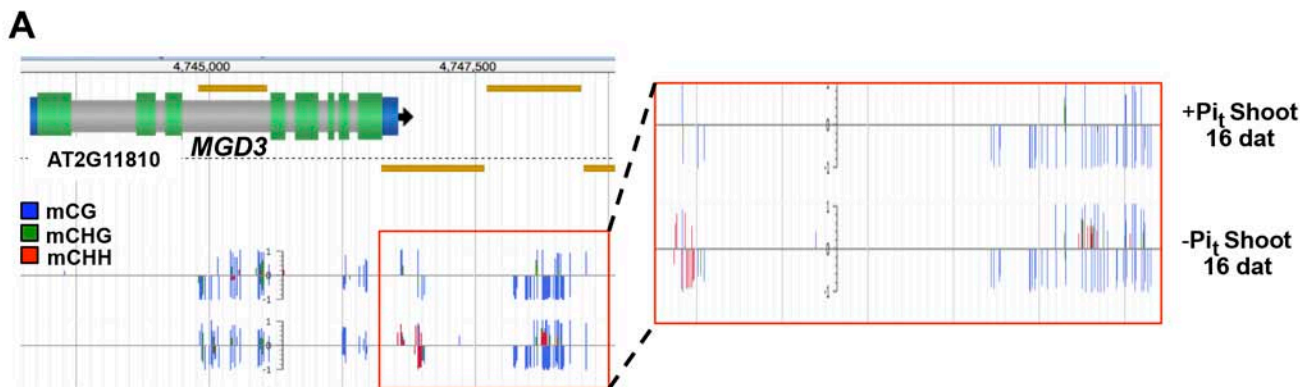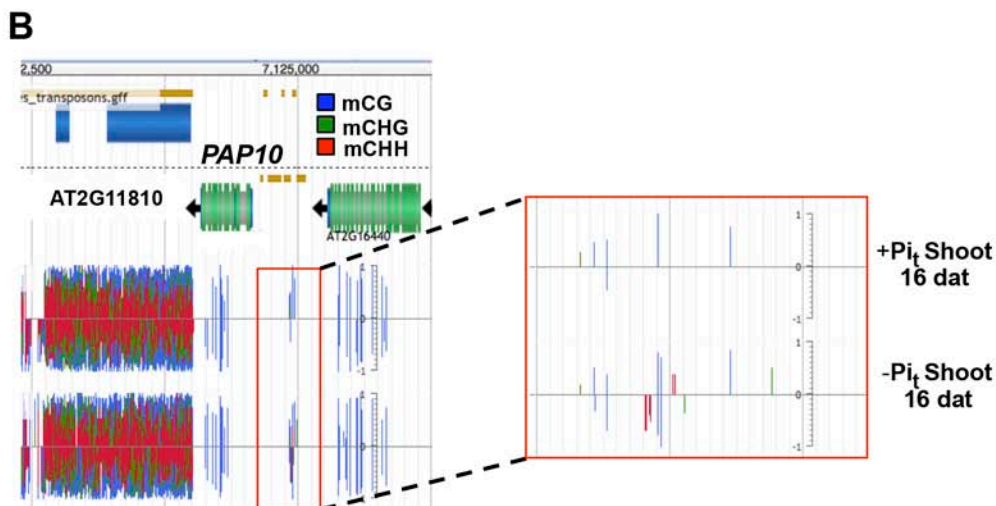

**Fig. S10. Genome browser visualization of methylation profiling of Arabidopsis *MGD3* and *PAP10* genes.** A) Genome browser screen shot from Arabidopsis *MGD3* locus, DNA methylation patterns during HP (+Pi<sub>t</sub> Shoot 16 dat) and LP (-Pi<sub>t</sub> Shoot 16 dat) conditions, zoom of differentially methylated zone is displayed on the right. A) Genome browser screen shot from Arabidopsis *PAP10* locus, DNA methylation patterns during HP (+Pi<sub>t</sub> Shoot 16 dat) and LP (-Pi<sub>t</sub> Shoot 16 dat) conditions, zoom of differentially methylated zone is displayed on the right.

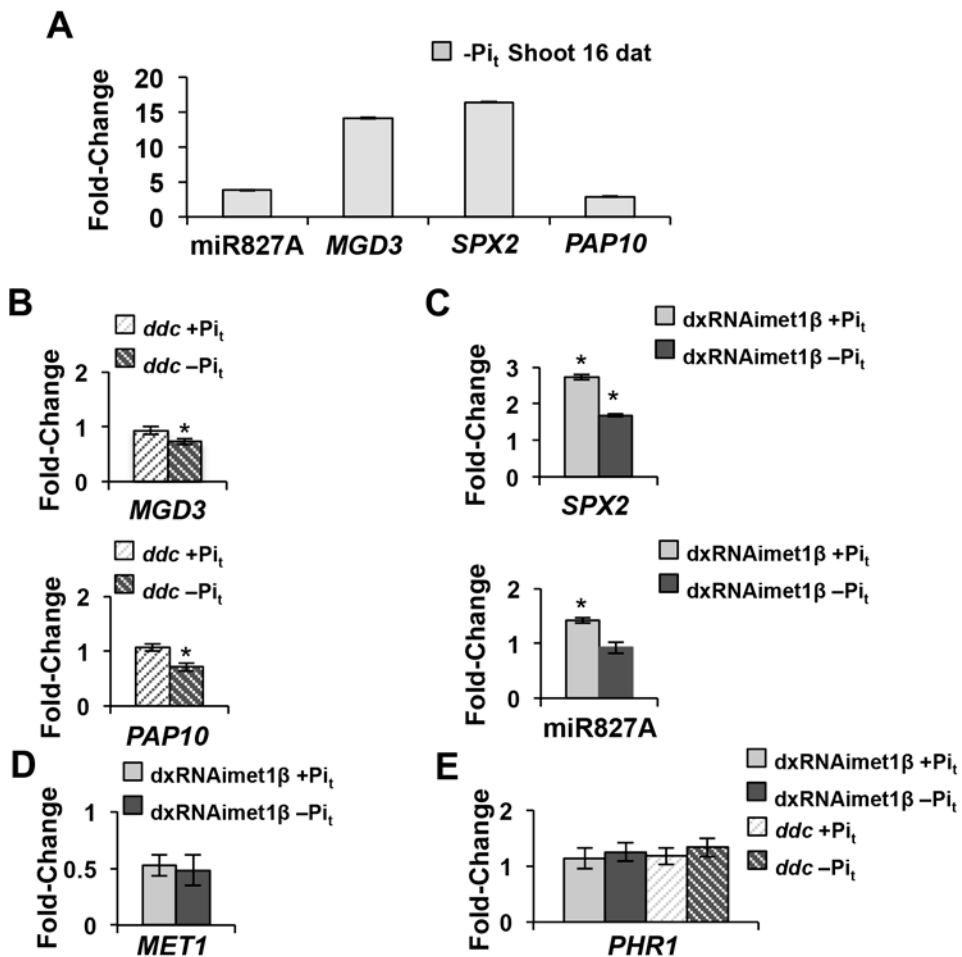

**Fig. S11. Expression analysis of PSR genes targeted by DNA methylation changes.** A) Real-time PCR analysis of *miR827A*, *MGD3*, *SPX2* and *PAP10* in the shoot of Col 0 seedlings grown in liquid MS under HP (+Pi<sub>t</sub> Shoot 16 dat) and LP (-Pi<sub>t</sub> Shoot 16 dat) conditions, *AtACT2*, *At5g55840* and *AT3G53090* were used as internal controls; HP values were used as calibrator samples. B) Real-time PCR analysis of *MGD3* and *PAP10* in the shoot of *ddc* triple mutants seedlings grown in liquid MS under HP (+Pi<sub>t</sub> Shoot 16 dat) and LP (-Pi<sub>t</sub> Shoot 16 dat) conditions. C) Real-time PCR analysis of *miR827A* and *SPX2* in shoot of *dxRNAimet1β* seedlings grown in liquid MS under HP-dexa (+Pi<sub>t</sub> Shoot 16 dat, 10 uM dexamethasone) and LP-dexa (-Pi<sub>t</sub> Shoot 16 dat, 10 uM dexamethasone) conditions. D) Real-time PCR analysis is shown for *MET1* in shoot of *dxRNAimet1β* seedlings grown in liquid MS under HP-dexa (+Pi<sub>t</sub> Shoot 16 dat, 10 uM dexamethasone) and LP dexa (-Pi<sub>t</sub> Shoot 16 dat, 10 uM dexamethasone) conditions. E) Real-time PCR analysis is shown for *PHR1* in shoot of *dxRNAimet1β* seedlings grown in liquid MS under HP-dexa (+Pi<sub>t</sub> Shoot 16 dat, 10 uM dexamethasone) and LP-dexa (-Pi<sub>t</sub> Shoot 16 dat, 10 uM dexamethasone) and *ddc* triple mutants in LP (-Pi<sub>t</sub> Shoot 16 dat) and HP (+Pi<sub>t</sub> Shoot 16 dat) conditions. In all cases dexamethasone was resupplied every 4 days into the hydroponic system and *AtACT2*, *At5g55840* and *AT3G53090* were used as internal controls; (B to E) WT respective values for each phosphate treatment (HP, LP) were used as calibrator samples for the respective treatments.



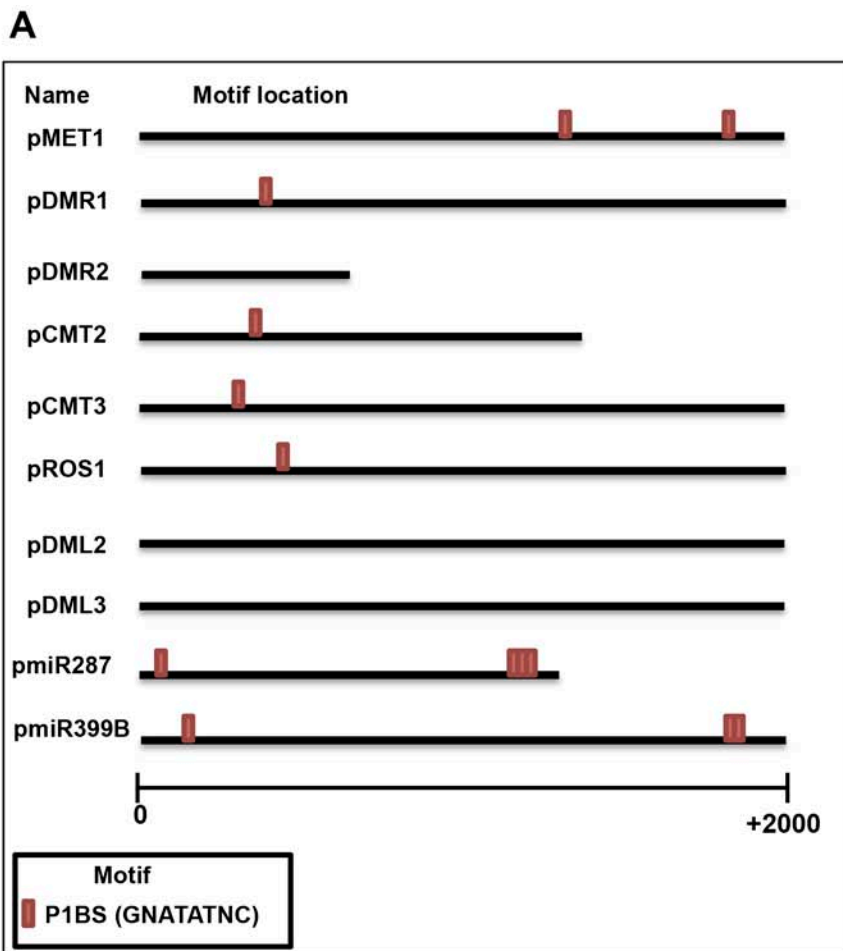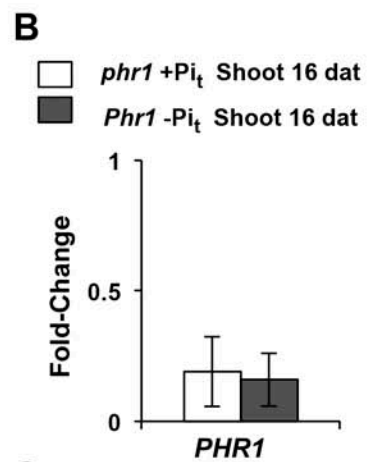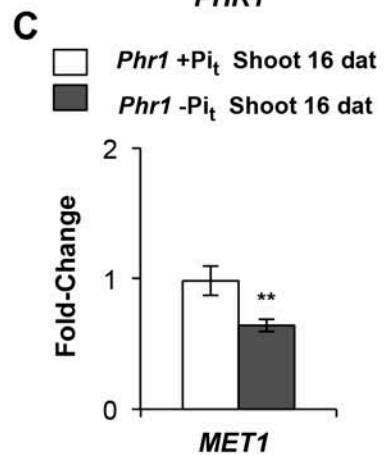

**Fig. S12. Expression of *MET1* is regulated by *PHR1*.** A) Analysis of the presence of P1BS motifs in a 2000 bp upstream region from the transcription start site (TSS) of DNA methyltransferases and demethylases; promoter regions of miR399B and miR287A were used as reference for the presence of P1BS in upstream regions, analysis was performed using the PLACE database (Red boxes indicate relative position of P1BS motifs from TSS (0) to 2000 bp upstream (+2000)). B) Real-time PCR analysis of *PHR1* in the shoot of *phr1* seedlings grown in liquid MS under HP (+Pi<sub>t</sub> Shoot 16 dat) and LP (-Pi<sub>t</sub> Shoot 16 dat) conditions. C) Real-time PCR analysis of *MET1* in the shoot of *phr1* seedlings grown in liquid MS under HP (+Pi<sub>t</sub> Shoot 16 dat) and LP (-Pi<sub>t</sub> Shoot 16 dat) conditions; notice that the level of expression of *MET1* is reduced by 40% in *phr1* respect to that found in the WT. *AtACT2*, *At5g55840* and *AT3G53090* were used as internal controls, and HP respective values for each phosphate treatment (HP, LP) were used as calibrator samples.

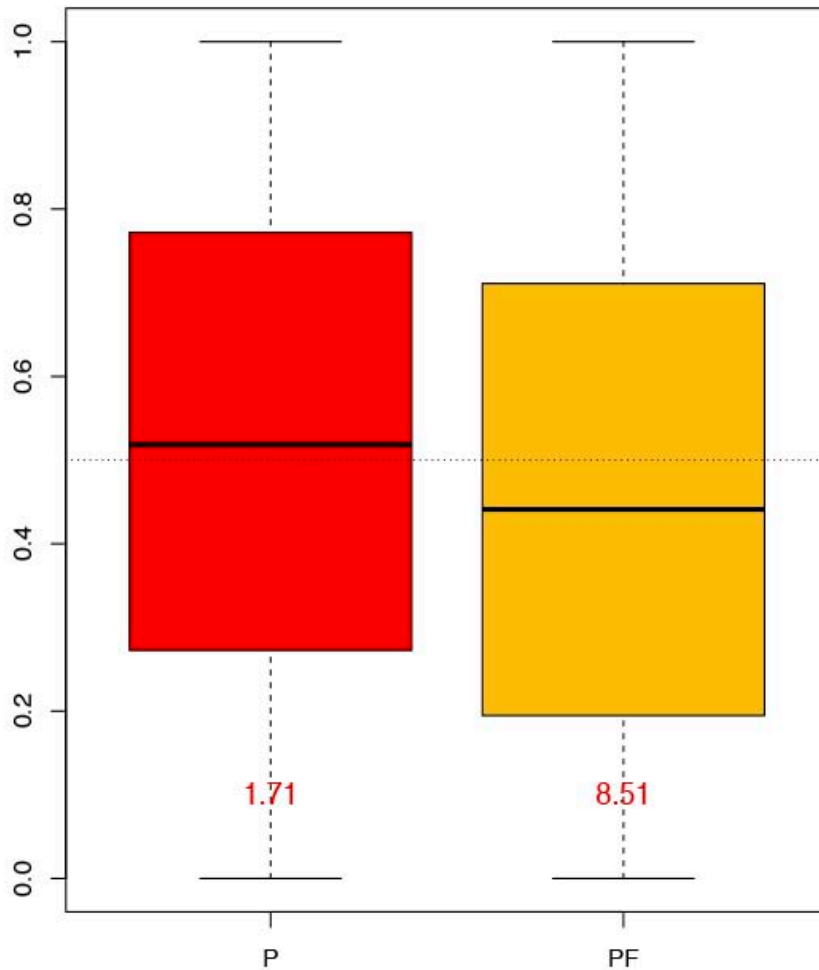

**Figure S13.** Boxplot for the probabilities of the tests on the parameter "P" (phosphorous) of the full model and the F-test (PF) for the 5,867,837 positions found to be methylated in all five chromosomes. The numbers in red are the percentages of significant tests in each distribution at  $\alpha = 0.05$ .

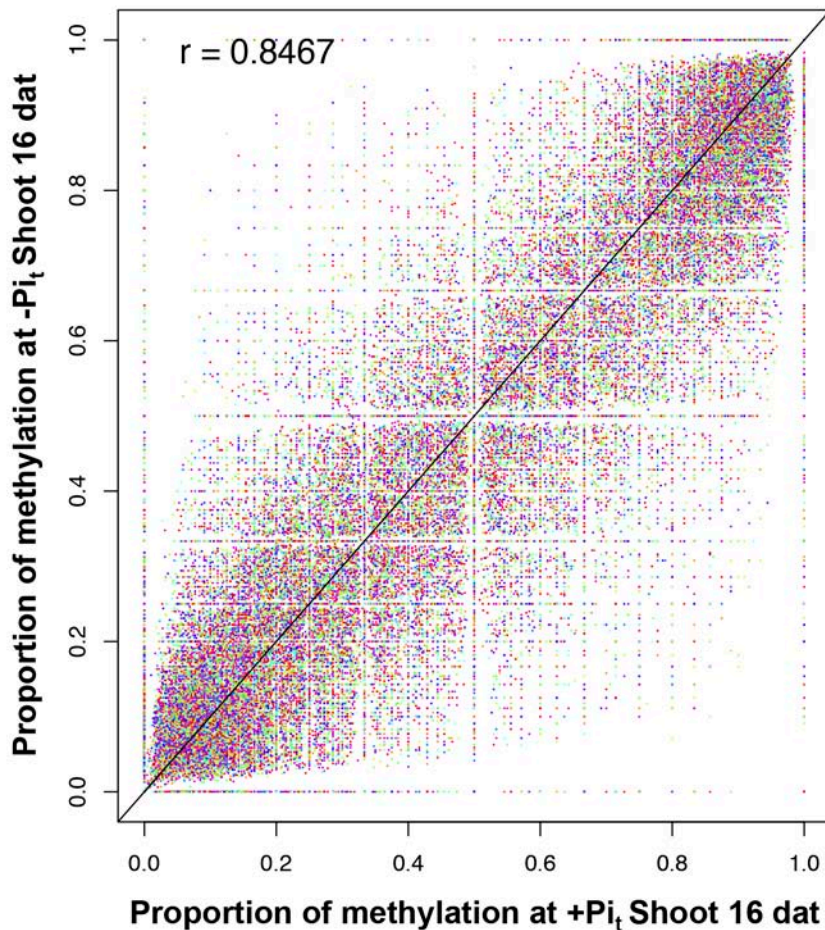

**Fig. S14.** Scatterplot for the estimated proportion of methylation (PM) for 100,000 positions, which are a random sample of the estimated 1,191,764 methylated cytosines. The proportion of methylation is shown as points for the treatments +Pi<sub>t</sub> Shoot 16 dat (X axis) and -Pi<sub>t</sub> Shoot 16 dat (Y axis). The estimated correlation between the values in the full set was  $r = 0.8467$ ,  $r^2 = 0.7168$

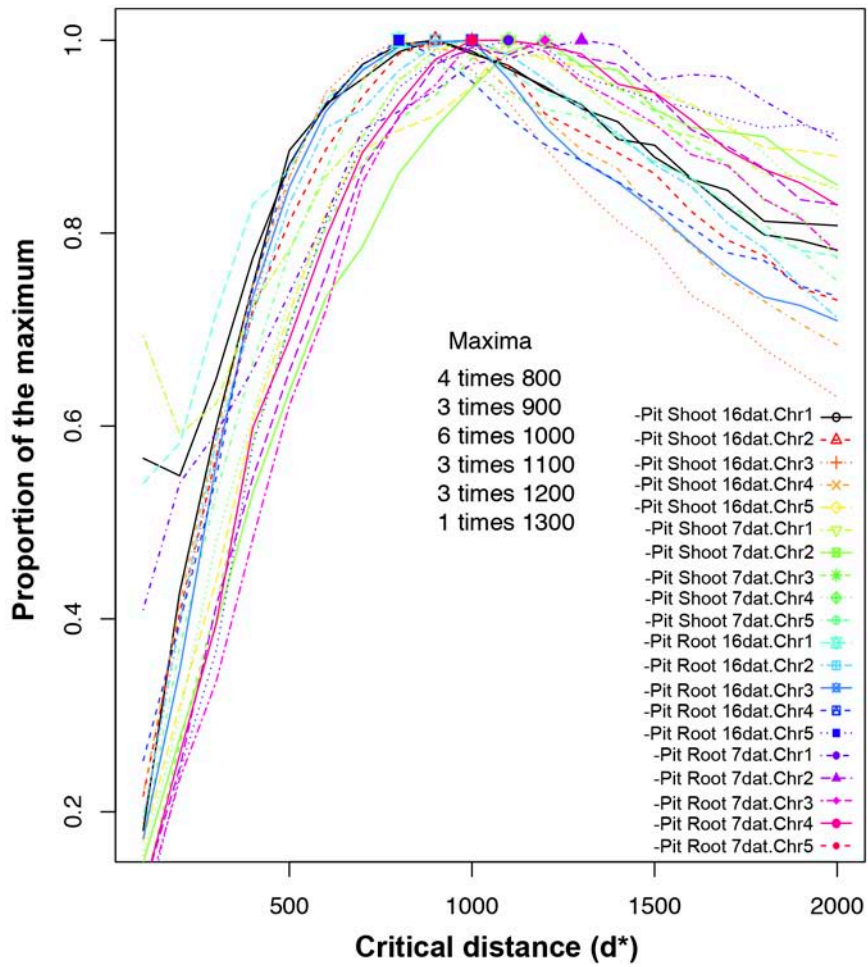

**Fig. S15.** Estimation of the optimum critic distance ( $d^*$ ) between DmCs that generates the maximum number of DMRs.

**TABLE S1.** Details of Methyl-Seq Libraries. Only reads mapping to Arabidopsis thaliana nuclear genome or phage Lambda genome are included in this analysis.

| <b>HIGH Pi LIBRARIES</b>                       | <b>+Pi Shoot 7 d.a.t. rep 1</b> | <b>+Pi Shoot 7 d.a.t. rep2</b> | <b>+Pi Root 7 d.a.t. rep1</b> | <b>+Pi Root 7 d.a.t. rep2</b> | <b>+Pi Shoot 16 d.a.t. rep1</b> | <b>+Pi Shoot 16 d.a.t. rep2</b> | <b>+Pi Root 16 d.a.t. rep1</b> | <b>+Pi Root 16 d.a.t. rep2</b> |
|------------------------------------------------|---------------------------------|--------------------------------|-------------------------------|-------------------------------|---------------------------------|---------------------------------|--------------------------------|--------------------------------|
| Reads (mapped and Non-clonal)                  | 25270793.18                     | 31917362.96                    | 28232152.9                    | 25535392.41                   | 29777020.66                     | 28593900.17                     | 27528487.47                    | 31567351.04                    |
| Total bases mapped                             | 2274371386                      | 2872562667                     | 2540893761                    | 2298185317                    | 2679931859                      | 2573451015                      | 2477563872                     | 2841061594                     |
| Lambda Cytosine Non-conversion/E               | 0.22%                           | 0.21%                          | 0.28%                         | 0.21%                         | 0.26%                           | 0.23%                           | 0.25%                          | 0.28%                          |
| % Genome Covered (at least 1 read)             | 95.2                            | 92.8                           | 94.12                         | 94.39                         | 93.1                            | 92.3                            | 94.2                           | 94.15                          |
| % Genomic Cytosines (at least 1 read)          | 91.24                           | 94.83                          | 94.64                         | 93.81                         | 92.04                           | 90.01                           | 94.85                          | 96.84                          |
| % Mappable Cytosines Covered (at least 1 read) | 93.7                            | 96.65                          | 96.5                          | 95.66                         | 94.46                           | 92.45                           | 96.63                          | 97.63                          |
| Average Read Depth at Cytosines                | 8.17                            | 9.99                           | 8.97                          | 8.24                          | 8.68                            | 8.84                            | 8.8                            | 10.15                          |
| Average Read Depth at Methylcytosines          | 17.79                           | 18.69                          | 18.55                         | 20.34                         | 18.36                           | 19.34                           | 18.27                          | 19.55                          |
| Number of nuclear Methylcytosines              | 2980982                         | 3306687                        | 2916656                       | 2702174                       | 3445532                         | 3355061                         | 3046141                        | 3281528                        |
| Context:                                       |                                 |                                |                               |                               |                                 |                                 |                                |                                |
| mCG (% of mC)                                  | 1288761 (43.23%)                | 1421450 (42.98%)               | 1365729 (46.82%)              | 1246458 (46.12%)              | 1359664 (39.46%)                | 1289981 (38.44%)                | 1364883 (44.8%)                | 1435887 (43.75%)               |
| mCHG (% of mC)                                 | 709206 (23.79%)                 | 773265 (23.39%)                | 727081 (24.93%)               | 688159 (25.48%)               | 797893 (23.16%)                 | 783625 (23.36%)                 | 744070 (24.43%)                | 792829 (24.17%)                |
| mCHH (% mC)                                    | 983015 (32.98%)                 | 1111981 (33.63%)               | 823846 (28.25%)               | 767557 (28.4%)                | 1287975 (37.38%)                | 1281455 (38.2%)                 | 937188 (30.77%)                | 1052812 (32.08%)               |
| % Genome methylated                            | 6.95%                           | 7.71%                          | 6.80%                         | 6.30%                         | 8.04%                           | 7.83%                           | 7.10%                          | 7.65%                          |

  

| <b>LOW Pi LIBRARIES</b>                        | <b>-Pi Shoot 7 d.a.t. rep1</b> | <b>-Pi Shoot 7 d.a.t. rep2</b> | <b>-Pi Root 7 d.a.t. rep1</b> | <b>-Pi Root 7 d.a.t. rep2</b> | <b>-Pi Shoot 16 d.a.t. rep1</b> | <b>-Pi Shoot 16 d.a.t. rep2</b> | <b>-Pi Root 16 d.a.t. rep1</b> | <b>-Pi Root 16 d.a.t. rep2</b> |
|------------------------------------------------|--------------------------------|--------------------------------|-------------------------------|-------------------------------|---------------------------------|---------------------------------|--------------------------------|--------------------------------|
| Reads (mapped and Non-clonal)                  | 29160717.39                    | 23710551.58                    | 28761991.72                   | 29309702.21                   | 32043716.57                     | 32744720                        | 31062117.82                    | 35006451.47                    |
| Total bases mapped                             | 2624464565                     | 2133949642                     | 2588579254                    | 2637873199                    | 2883934491                      | 2947024800                      | 2795590604                     | 3150580632                     |
| Lambda Cytosine Non-conversion/E               | 0.23%                          | 0.24%                          | 0.21%                         | 0.23%                         | 0.30%                           | 0.32%                           | 0.25%                          | 0.21%                          |
| % Genome Covered (at least 1 read)             | 93.7                           | 92.1                           | 92.8                          | 95.3                          | 93.4                            | 95.1                            | 92.5                           | 92.2                           |
| % Genomic Cytosines (at least 1 read)          | 94.28                          | 90.51                          | 94.43                         | 94.11                         | 94.96                           | 96.08                           | 91.39                          | 91.09                          |
| % Mappable Cytosines Covered (at least 1 read) | 96.19                          | 93.1                           | 96.33                         | 96.66                         | 96.78                           | 97.63                           | 93.91                          | 93.87                          |
| Average Read Depth at Cytosines                | 9.31                           | 7.69                           | 9.28                          | 9.45                          | 10.18                           | 10.19                           | 10.24                          | 11.59                          |
| Average Read Depth at Methylcytosines          | 17.86                          | 17.4                           | 18.73                         | 20.08                         | 19.38                           | 18.71                           | 21.67                          | 24.23                          |
| Number of nuclear Methylcytosines              | 3283241                        | 3066983                        | 2979224                       | 3009773                       | 3771690                         | 3618308                         | 3334243                        | 3411372                        |
| Context:                                       |                                |                                |                               |                               |                                 |                                 |                                |                                |
| mCG (% of mC)                                  | 1391530 (42.38%)               | 1276730 (41.62%)               | 1373719 (46.1%)               | 1364087 (45.32%)              | 1461364 (38.74%)                | 1464186 (40.46%)                | 1385494 (41.55%)               | 1397878 (40.97%)               |
| mCHG (% of mC)                                 | 766382 (23.34%)                | 727270 (23.72%)                | 742871 (24.95%)               | 752425 (25%)                  | 844573 (22.4%)                  | 816646 (22.58%)                 | 799461 (23.98%)                | 814762 (23.89%)                |
| mCHH (% mC)                                    | 1125329 (34.28%)               | 1062983 (34.66%)               | 862634 (28.95%)               | 893261 (29.68%)               | 1465753 (38.86%)                | 1337476 (36.96%)                | 1149288 (34.47%)               | 1198732 (35.14%)               |
| % Genome methylated                            | 7.66%                          | 7.15%                          | 6.95%                         | 7.02%                         | 8.80%                           | 8.44%                           | 7.78%                          | 7.96%                          |

**Table S2.** Differentially expressed genes targeted by differential methylation (Pi-methDEGs) representative of GO enriched categories. Arabidopsis Locus ID and Gene Descriptions of Pi-methDEGs are shown.

| <u>Locus ID</u> | <u>Gene Description</u>                                                        |
|-----------------|--------------------------------------------------------------------------------|
| AT4G13390       | EXTENSIN 12 ( <i>EXT12</i> ) <sup>Hypo, Down</sup>                             |
| AT1G08430       | ALUMINUM-ACTIVATED MALATE TRANSPORTER 1 ( <i>ALMT1</i> ) <sup>Hyper,Down</sup> |
| AT1G20840       | TONOPLAST MONOSACCHARIDE TRANSPORTER1 ( <i>TMT1</i> ) <sup>Hyper,Down</sup>    |
| AT1G52940       | PURPLE ACID PHOSPHATASE 5 ( <i>PAP5</i> ) <sup>Hypo, Up</sup>                  |
| AT2G11810       | MONOGALACTOSYL DIACYLGLYCEROL SYNTHASE 3 ( <i>MGD3</i> ) <sup>Hyper,Up</sup>   |
| AT1G21250       | CELL WALL-ASSOCIATED KINASE ( <i>WAK1</i> ) <sup>Hypo, Up</sup>                |
| AT1G35625       | RING/U-BOX SUPERFAMILY PROTEIN <sup>Hypo,Up</sup>                              |

<sup>Up</sup> Upregulated    <sup>Down</sup> Downregulated  
<sup>Hypo</sup> Hypo-methylated    <sup>Hyper</sup> Hyper-methylated

**Table S3.** GO enrichment analysis of differentially methylated PSR genes (Pi-methDEGs) and Pi Factor differentially methylated PSR genes (Pf-methDEGs). (VirtualPlant 1.3).

|                                                           | <u>Category</u>                                    | <u>Count</u> | <u>% of total</u> | <u>P-value</u> | <u>Normed Frequency (Fold-Change)</u> |
|-----------------------------------------------------------|----------------------------------------------------|--------------|-------------------|----------------|---------------------------------------|
| <b>Pi-methDEGs</b>                                        |                                                    |              |                   |                |                                       |
| <u>Pi-methDEGs Short Term</u>                             | Receptor enzyme mediated signalling                | 14           | 1.2               | 0.000547       | 4.41                                  |
| <u>Pi-methDEGs Long Term</u>                              | Glycolipid metabolism                              | 5            | 1.3               | 0.00062        | 13                                    |
|                                                           | Transported compounds (substrates)                 | 61           | 16                | 1.84e-05       | 2.05                                  |
|                                                           | Phosphate metabolism                               | 56           | 14.7              | 0.00062        | 2                                     |
| <u>Pi-methDEGs Short Term <math>\cap</math> Long Term</u> | Glycolipid metabolism                              | 3            | 6.1               | 0.000666       | 61                                    |
| <u>Pi-methDEGs Root</u>                                   | Transmembrane signal transduction                  | 18           | 6.5               | 1.13e-05       | 4.64                                  |
|                                                           | Phosphate metabolism                               | 37           | 13.5              | 0.00329        | 1.95                                  |
| <u>Pi-methDEGs Shoot</u>                                  | Glycolipid metabolism                              | 4            | 1.2               | 0.00597        | 12                                    |
|                                                           | Cellular sensing and response to external stimulus | 37           | 10.7              | 0.00597        | 1.94                                  |
|                                                           | Phosphate metabolism                               | 52           | 15.1              | 0.00121        | 1.91                                  |
| <u>Pi-methDEGs Root <math>\cap</math> Shoot</u>           | Protein/peptide degradation                        | 5            | 16.6              | 0.03           | 4.3                                   |
|                                                           | Cell wall                                          | 3            | 10                | 0.03           | 8.7                                   |
| <b>Pf-methDEGs</b>                                        | METABOLISM                                         | 74           | 35.7              | 0.000125       | 1.72                                  |
|                                                           | Phosphate metabolism                               | 36           | 17.4              | 0.00109        | 2.2                                   |

**Table S4.** Phosphate Starvation responsive genes targeted by differential methylation (Pi-methDEGs). Locus ID of Pi-methDEGs is shown. Hypermethylated and Hypomethylated DEGs are listed as Upregulated or Downregulated. Each particular LP contrast is showed by separated.

**-Pi<sub>t</sub> Shoot 7 dat**

| <b>Hypermethylated</b> |                      | <b>Hypomethylated</b> |                      |
|------------------------|----------------------|-----------------------|----------------------|
| <b>Upregulated</b>     | <b>Downregulated</b> | <b>UpRegulated</b>    | <b>Downregulated</b> |
| AT5G41750              | AT1G68440            | AT2G18150             | AT1G74290            |
| AT1G58280              | AT5G18030            | AT3G47480             | AT1G12020            |
| AT2G18530              | AT3G46240            | AT1G61370             | AT2G15020            |
| AT5G37840              | AT1G29450            | AT2G17500             | AT5G15360            |
| AT1G61480              | AT3G51870            | AT2G04495             | AT2G26215            |
| AT1G54095              | AT3G09162            | AT1G03940             | AT5G59070            |
| AT4G04990              | AT4G34730            | AT5G35050             | AT3G01345            |
| AT4G14090              | AT1G63540            | AT4G00500             | AT5G13770            |
| AT3G17190              | AT5G66520            | AT4G10500             | AT5G67385            |
| AT4G15270              | AT5G10340            | AT2G04400             | AT1G67900            |
| AT2G04100              | AT5G37130            | AT1G02470             | AT5G24155            |
| AT1G64610              | AT1G49990            | AT4G33770             | AT3G26490            |
| AT3G14205              | AT3G54770            | AT3G03790             | AT2G16270            |
| AT5G07570              | AT3G48420            | AT2G38250             | AT5G38000            |
| AT1G66360              | AT4G20362            | AT1G74270             | AT4G38340            |
| AT5G38910              | AT3G54580            | AT4G15540             | AT3G21870            |
| AT5G67340              | AT2G04795            | AT3G25610             | AT2G24720            |
| AT3G28210              | AT2G25900            | AT3G09830             | AT5G09660            |
| AT1G32960              | AT4G17460            | AT4G38560             | AT2G33770            |
| AT1G72330              | AT1G08430            | AT1G49800             | AT2G18470            |
| AT2G47000              | AT4G26320            | AT1G26380             | AT3G02850            |
| AT1G79400              | AT3G18290            | AT4G20210             | AT1G65730            |
| AT1G62540              | AT4G37610            | AT1G08310             |                      |
| AT1G74590              | AT4G35090            | AT4G22470             |                      |
| AT3G09270              | AT4G27030            | AT4G21390             |                      |
| AT2G34600              | AT4G09600            | AT3G57240             |                      |
| AT5G27600              | AT2G17780            | AT2G05710             |                      |
| AT2G11810              | AT1G32450            | AT4G04610             |                      |
| AT4G37670              | AT2G39730            | AT3G59140             |                      |
| AT2G16430              | AT4G07400            | AT4G23700             |                      |
|                        | AT5G13740            | AT1G21250             |                      |
|                        |                      | AT4G04490             |                      |
|                        |                      | AT2G39770             |                      |
|                        |                      | AT4G15200             |                      |
|                        |                      | AT3G47420             |                      |
|                        |                      | AT1G17420             |                      |
|                        |                      | AT3G59884             |                      |
|                        |                      | AT5G20410             |                      |
|                        |                      | AT3G61990             |                      |
|                        |                      | AT3G20660             |                      |
|                        |                      | AT5G39050             |                      |
|                        |                      | AT1G53310             |                      |
|                        |                      | AT3G26840             |                      |
|                        |                      | AT3G08720             |                      |
|                        |                      | AT2G26660             |                      |
|                        |                      | AT4G08390             |                      |
|                        |                      | AT1G66570             |                      |
|                        |                      | AT4G33030             |                      |
|                        |                      | AT3G56040             |                      |
|                        |                      | AT2G36750             |                      |
|                        |                      | AT1G21240             |                      |
|                        |                      | AT1G80840             |                      |



**-Pi<sub>t</sub> Root 7 dat**

| <u>Hypermethylated</u> |                      | <u>Downmethylated</u> |                      |
|------------------------|----------------------|-----------------------|----------------------|
| <u>Upregulated</u>     | <u>Downregulated</u> | <u>Upregulated</u>    | <u>Downregulated</u> |
| AT5G20790              | AT2G35920            | AT2G16676             | AT4G16900            |
| AT1G54095              | AT2G15980            | AT4G27850             | AT2G17033            |
| AT3G04050              | AT3G53360            | AT1G21930             | AT2G03140            |
| AT4G03140              | AT3G27870            | AT1G70130             | AT1G02890            |
| AT4G15990              | AT3G55160            | AT2G20320             | AT4G26680            |
| AT2G20560              | AT2G17525            | AT4G28930             | AT1G66180            |
| AT1G71140              | AT1G72180            | AT5G47980             | AT5G19740            |
| AT2G34210              | AT1G21630            | AT5G52700             | AT3G50370            |
| AT1G61610              | AT5G46460            | AT1G08590             | AT3G63070            |
| AT1G72890              | AT1G50180            | AT2G16230             | AT5G13770            |
| AT3G28930              | AT3G28690            | AT4G22217             | AT1G17450            |
| AT1G67980              | AT1G17600            | AT2G07678             | AT5G10800            |
| AT4G39640              | AT2G07676            | AT5G27950             | AT1G64310            |
| AT1G54030              | AT3G09162            | AT2G14290             | AT3G24190            |
| AT1G06160              | AT4G00910            | AT2G22770             | AT4G02660            |
| AT4G01470              | AT1G63540            | AT3G05690             | AT1G62310            |
|                        | AT2G17930            | AT4G09030             | AT2G32240            |
|                        | AT5G41780            | AT2G22470             | AT5G46450            |
|                        | AT2G22070            | AT5G25250             | AT1G26270            |
|                        | AT1G16800            | AT2G47275             | AT5G02860            |
|                        | AT3G47110            | AT1G31885             | AT1G27180            |
|                        | AT3G18840            | AT3G54700             | AT3G22275            |
|                        | AT1G03540            | AT2G26560             | AT1G35660            |
|                        | AT1G79710            | AT1G11180             | AT1G52320            |
|                        | AT3G05340            | AT1G22150             | AT2G31970            |
|                        | AT4G17140            | AT4G23920             | AT1G76990            |
|                        | AT1G53800            | AT2G26660             | AT5G40820            |
|                        | AT1G74580            |                       | AT4G01820            |
|                        | AT2G07751            |                       | AT1G30410            |
|                        | AT5G24350            |                       | AT1G19220            |
|                        | AT5G37130            |                       | AT2G28470            |
|                        | AT4G16920            |                       | AT4G19020            |
|                        | AT4G31210            |                       | AT3G05680            |
|                        | AT1G73710            |                       | AT3G04340            |
|                        | AT4G19530            |                       | AT5G19820            |
|                        | AT5G20610            |                       | AT5G64390            |
|                        | AT1G67120            |                       | AT1G50840            |
|                        | AT5G14880            |                       | AT5G02310            |
|                        | AT1G22060            |                       | AT4G11110            |
|                        | AT2G25730            |                       | AT1G04110            |
|                        | AT3G14460            |                       | AT1G12280            |
|                        | AT3G11964            |                       | AT4G16890            |
|                        | AT3G06530            |                       | AT1G70320            |
|                        | AT4G20362            |                       |                      |
|                        | AT4G05631            |                       |                      |
|                        | AT5G59650            |                       |                      |
|                        | AT3G54580            |                       |                      |
|                        | AT4G36140            |                       |                      |
|                        | AT2G07673            |                       |                      |
|                        | AT2G15900            |                       |                      |
|                        | AT5G05400            |                       |                      |
|                        | AT2G01910            |                       |                      |
|                        | AT1G24706            |                       |                      |
|                        | AT4G18600            |                       |                      |
|                        | AT3G47930            |                       |                      |
|                        | AT1G80070            |                       |                      |
|                        | AT3G02260            |                       |                      |
|                        | AT2G01950            |                       |                      |
|                        | AT1G06490            |                       |                      |
|                        | AT2G22125            |                       |                      |
|                        | AT4G00450            |                       |                      |
|                        | AT3G27170            |                       |                      |

AT2G18760  
 AT4G09680  
 AT1G01040  
 AT5G13010  
 AT5G46330  
 AT3G14270  
 AT5G47820  
 AT3G07160  
 AT2G31960  
 AT1G16710  
 AT5G13530  
 AT4G08480  
 AT4G14760  
 AT4G02710  
 AT4G32850  
 AT1G79280  
 AT4G30710  
 AT1G67500  
 AT3G27670  
 AT1G02500  
 AT2G38440  
 AT3G26030  
 AT4G15180  
 AT5G42400  
 AT4G16340  
 AT1G55860  
 AT3G06290

**-Pi<sub>t</sub> Shoot 16 dat**

| <u>Hypermethylated</u> |                      | <u>Hypomethylated</u> |                      |
|------------------------|----------------------|-----------------------|----------------------|
| <u>Upregulated</u>     | <u>Downregulated</u> | <u>Upregulated</u>    | <u>Downregulated</u> |
| AT1G67520              | AT1G12730            | AT1G36622             | AT2G47020            |
| AT5G41750              | AT4G03100            | AT2G45920             | AT2G32500            |
| AT4G20460              | AT5G14120            | AT2G18150             | AT1G29560            |
| AT2G38823              | AT1G57770            | AT1G61370             | AT5G28415            |
| AT1G21940              | AT5G26730            | AT2G04495             | AT5G26670            |
| AT4G23000              | AT1G19720            | AT5G15480             | AT5G51150            |
| AT4G09780              | AT5G15780            | AT4G01700             | AT2G21045            |
| AT1G68850              | AT1G24160            | AT1G26390             | AT4G21250            |
| AT5G39110              | AT3G44755            | AT2G18690             | AT1G66180            |
| AT4G04990              | AT1G34047            | AT2G42980             | AT1G68400            |
| AT3G59570              | AT5G14020            | AT4G01350             | AT5G49152            |
| AT5G24200              | AT2G30600            | AT3G49980             | AT5G28262            |
| AT5G41280              | AT4G20430            | AT4G00500             | AT1G63100            |
| AT2G43880              | AT4G36470            | AT4G10500             | AT5G17165            |
| AT4G10260              | AT5G44410            | AT3G14470             | AT4G16008            |
| AT2G41730              | AT2G05540            | AT2G14878             | AT5G19740            |
| AT3G45330              | AT3G09080            | AT1G26410             | AT3G52490            |
| AT2G15780              | AT2G14760            | AT1G21529             | AT2G15880            |
| AT1G69790              | AT5G06670            | AT3G22850             | AT5G57100            |
| AT3G43110              | AT2G25160            | AT2G04400             | AT3G53680            |
| AT2G05580              | AT5G28840            | AT1G61360             | AT1G30870            |
| AT2G02720              | AT3G49290            | AT5G35425             | AT3G04450            |
| AT5G52710              | AT2G14170            | AT1G02470             | AT4G28410            |
| AT3G28210              | AT1G20650            | AT4G33770             | AT5G28630            |
| AT1G32960              | AT4G26320            | AT5G25260             | AT5G13770            |
| AT4G12120              | AT3G21090            | AT4G14368             | AT4G01330            |
| AT4G08870              | AT3G18290            | AT5G63680             | AT5G27890            |
| AT1G02520              | AT4G37610            | AT5G45720             | AT3G46600            |
| AT2G14580              | AT5G57180            | AT3G03790             | AT5G35170            |
| AT3G03640              | AT5G37630            | AT3G14700             | AT5G04960            |
| AT3G21520              | AT5G06640            | AT5G45000             | AT2G15960            |

AT1G54040  
AT1G62540  
AT2G26150  
AT2G11810  
AT1G01010  
AT1G62580  
AT2G22860  
AT1G07390  
AT3G11570

AT2G24980  
AT3G60530  
AT3G47340  
AT5G54280  
AT1G60800  
AT4G16370  
AT1G34355  
AT5G01180  
AT5G04230  
AT1G32060  
AT5G52920  
AT2G01918  
AT1G67710  
AT3G10710  
AT3G13065  
AT5G63920  
AT1G70290  
AT5G01360  
AT5G13740

AT3G43250  
AT1G13340  
AT1G62760  
AT2G36724  
AT2G18720  
AT5G58620  
AT5G23950  
AT3G15518  
AT5G15070  
AT3G19970  
AT1G26420  
AT4G38560  
AT1G63530  
AT3G29970  
AT5G17390  
AT4G32250  
AT1G28180  
AT5G25930  
AT4G36430  
AT1G13470  
AT4G39675  
AT5G53048  
AT1G35625  
AT1G26380  
AT5G55410  
AT3G63380  
AT2G15830  
AT5G14550  
AT4G10720  
AT5G26690  
AT1G61550  
AT2G16870  
AT3G10320  
AT2G04070  
AT4G15120  
AT5G53110  
AT1G08310  
AT1G55790  
AT1G32950  
AT1G43910  
AT3G62590  
AT3G21700  
AT3G48300  
AT4G37370  
AT4G39980  
AT3G51970  
AT1G17290  
AT5G20960  
AT4G09030  
AT2G22470  
AT3G59140  
AT3G13100  
AT5G13320  
AT1G61810  
AT5G17860  
AT5G58940  
AT4G23700  
AT1G29230  
AT1G21250  
AT1G01340  
AT3G17690  
AT4G04490  
AT4G04510  
AT4G04540  
AT2G39770  
AT2G04040

AT2G05632  
AT1G78020  
AT1G33640  
AT3G16180  
AT3G18845  
AT1G67870  
AT5G37010  
AT3G01310  
AT3G22142  
AT5G07570  
AT1G09460  
AT1G50732  
AT1G52870  
AT4G20820  
AT1G74770  
AT2G16140  
AT5G44530  
AT1G61760  
AT3G07070  
AT3G22150  
AT1G64720  
AT1G20080  
AT5G28080  
AT5G36120  
AT3G48290  
AT3G26310  
AT3G14630  
AT1G24540  
AT1G49720  
AT3G25690  
AT5G52100  
AT3G42670  
AT2G28190  
AT4G08920  
AT2G26760  
AT3G01480  
AT4G14140  
AT4G05520  
AT4G13390  
AT1G50240  
AT4G04330  
AT3G54590  
AT4G16480  
AT1G05360  
AT2G46740  
AT4G10340  
AT4G25560  
AT5G35407  
AT3G60840  
AT2G01530  
AT3G08500  
AT1G70760  
AT2G23050  
AT2G34710  
AT2G33770  
AT5G26570  
AT1G61520  
AT3G55980  
AT5G63780  
AT1G53160  
AT2G29630  
AT5G46700  
AT5G55820

AT4G25640  
 AT4G34200  
 AT4G00900  
 AT1G70140  
 AT5G39190  
 AT3G47420  
 AT4G28490  
 AT4G37680  
 AT1G51760  
 AT1G51800  
 AT3G45140  
 AT2G36530  
 AT3G59884  
 AT2G25680  
 AT5G20410  
 AT2G19900  
 AT2G22560  
 AT1G37130  
 AT3G61990  
 AT2G40180  
 AT5G43350  
 AT1G53310  
 AT5G56630  
 AT3G05630  
 AT2G26010  
 AT2G18660  
 AT1G52940  
 AT3G53620  
 AT3G26090  
 AT4G21470  
 AT1G12210  
 AT3G08720  
 AT2G26660  
 AT5G66760  
 AT3G43190  
 AT4G02050  
 AT4G33030  
 AT1G74100  
 AT5G54810  
 AT3G56040  
 AT3G53150  
 AT1G24100  
 AT1G05620  
 AT5G24380

**-Pi<sub>t</sub> Root 16 dat**

| <u>Hypermethylated</u> |                      | <u>Hypomethylated</u> |                      |
|------------------------|----------------------|-----------------------|----------------------|
| <u>Upregulated</u>     | <u>Downregulated</u> | <u>Upregulated</u>    | <u>Downregulated</u> |
| AT4G16900              | AT4G03380            | AT5G02180             | AT5G44578            |
| AT4G13690              | AT3G45070            | AT2G47950             | AT4G08300            |
| AT4G37710              | AT1G43140            | AT2G18690             | AT5G25040            |
| AT3G23450              | AT1G12730            | AT2G22930             | AT1G50050            |
| AT5G26270              | AT2G34100            | AT4G00500             | AT4G18250            |
| AT4G23000              | AT2G10560            | AT4G08450             | AT4G15590            |
| AT1G63750              | AT2G07676            | AT1G21529             | AT5G52790            |
| AT5G26280              | AT2G07687            | AT2G36730             | AT4G04930            |
| AT1G67000              | AT3G46490            | AT4G33770             | AT2G28470            |
| AT5G39110              | AT2G07675            | AT4G02320             | AT4G13390            |
| AT1G26250              | AT2G07722            | AT4G05140             | AT3G17320            |
| AT4G04990              | AT4G08290            | AT5G14120             | AT5G24920            |
| AT2G07698              | AT2G05790            | AT3G26614             | AT5G55250            |
| AT1G45015              | AT2G07751            | AT1G63540             | AT3G58810            |

|           |           |           |           |
|-----------|-----------|-----------|-----------|
| AT2G41730 | AT2G07682 | AT3G30340 | AT1G30510 |
| AT5G42930 | AT2G07777 | AT3G44510 | AT3G48260 |
| AT1G20390 | AT2G19660 | AT1G33030 |           |
| AT2G12200 | AT2G07721 | AT5G64000 |           |
| AT1G26240 | AT1G47400 | AT4G39980 |           |
| AT2G07671 | AT4G22460 | AT5G05730 |           |
| AT2G15220 | AT1G34047 | AT2G04040 |           |
| AT5G27845 | AT1G36240 | AT3G11670 |           |
| AT1G32970 | AT3G14730 | AT1G78360 |           |
| AT5G57610 | AT5G45230 | AT3G47420 |           |
| AT3G45720 | AT2G34290 | AT3G46330 |           |
| AT5G38910 | AT3G54580 | AT3G59884 |           |
| AT5G67340 | AT2G07673 | AT1G63020 |           |
| AT4G10060 | AT1G44835 | AT1G16370 |           |
| AT1G57630 | AT4G19980 | AT1G73220 |           |
| AT4G39210 | AT1G44030 | AT1G21230 |           |
| AT1G12240 | AT2G28250 | AT2G26660 |           |
| AT1G32200 | AT2G02120 |           |           |
| AT1G68050 | AT5G06905 |           |           |
| AT2G29940 | AT2G13540 |           |           |
| AT2G46530 | AT3G21090 |           |           |
| AT1G47960 | AT4G21760 |           |           |
| AT4G23600 | AT5G45380 |           |           |
| AT1G62560 | AT1G48300 |           |           |
| AT5G14780 | AT3G42640 |           |           |
| AT2G32400 | AT4G30110 |           |           |
| AT1G30560 | AT1G71920 |           |           |
| AT2G05520 | AT4G18120 |           |           |
| AT1G55020 | AT2G16640 |           |           |
| AT3G14720 | AT4G37590 |           |           |
| AT5G22300 | AT5G04950 |           |           |
| AT1G20860 | AT1G08090 |           |           |
| AT2G05620 | AT1G74260 |           |           |
| AT3G09910 | AT1G62280 |           |           |
| AT1G11720 | AT1G20840 |           |           |
| AT5G20280 | AT5G40850 |           |           |
| AT3G54670 | AT1G16160 |           |           |
| AT1G30530 | AT5G45105 |           |           |

**Table S5.** List of differentially methylated PSR genes (Pi-methDEGs). Locus ID and gene description of Pi-methDEGs is shown. Pi-methDEGs are arranged by methylation direction (Hypermethylation, Hypomethylation) and by expression (Upregulated, Downregulated).

**Hypermethylated**

**Upregulated**

| <b><u>Locus ID</u></b> | <b><u>Gene Description</u></b>                                           |
|------------------------|--------------------------------------------------------------------------|
| AT4G16900              | Disease resistance protein (TIR-NBS-LRR class) family                    |
| AT1G67520              | lectin protein kinase family protein                                     |
| AT5G41750              | Disease resistance protein (TIR-NBS-LRR class) family                    |
| AT4G13690              | unknown protein                                                          |
| AT4G37710              | VQ motif-containing protein                                              |
| AT3G23450              | unknown protein                                                          |
| AT5G26270              | unknown protein                                                          |
| AT1G58280              | Phosphoglycerate mutase family protein                                   |
| AT2G18530              | Protein kinase superfamily protein                                       |
| AT5G37840              | unknown protein                                                          |
| AT4G20460              | NAD(P)-binding Rossmann-fold superfamily protein                         |
| AT2G38823              | unknown protein                                                          |
| AT1G21940              | unknown protein                                                          |
| AT1G61480              | S-locus lectin protein kinase family protein                             |
| AT4G23000              | Calcineurin-like metallo-phosphoesterase superfamily protein             |
| AT1G63750              | Disease resistance protein (TIR-NBS-LRR class) family                    |
| AT5G26280              | TRAF-like family protein                                                 |
| AT4G09780              | TRAF-like family protein                                                 |
| AT1G67000              | Protein kinase superfamily protein                                       |
| AT1G68850              | Peroxidase superfamily protein                                           |
| AT5G20790              | unknown protein                                                          |
| AT1G54095              | Protein of unknown function (DUF1677)                                    |
| AT5G39110              | RmIC-like cupins superfamily protein                                     |
| AT1G26250              | Proline-rich extensin-like family protein                                |
| AT4G04990              | Protein of unknown function (DUF761)                                     |
| AT4G14090              | Anthocyanidin 5-O-glucosyltransferase                                    |
| AT3G17190              | unknown protein                                                          |
| AT4G15270              | glucosyltransferase-related                                              |
| AT3G04050              | Pyruvate kinase family protein                                           |
| AT3G59570              | Ypt/Rab-GAP domain of gyp1p superfamily protein                          |
| AT5G24200              | alpha/beta-Hydrolases superfamily protein                                |
| AT4G03140              | NAD(P)-binding Rossmann-fold superfamily protein                         |
| AT2G07698              | ATPase, F1 complex, alpha subunit protein                                |
| AT1G45015              | MD-2-related lipid recognition domain-containing protein                 |
| AT5G41280              | Receptor-like protein kinase-related family protein                      |
| AT2G43880              | Pectin lyase-like superfamily protein                                    |
| AT4G10260              | pfkB-like carbohydrate kinase family protein                             |
| AT4G15990              | unknown protein                                                          |
| AT2G41730              | unknown protein                                                          |
| AT5G42930              | alpha/beta-Hydrolases superfamily protein                                |
| AT1G20390              | transposable element gene                                                |
| AT2G12200              | P-loop containing nucleoside triphosphate hydrolases superfamily protein |
| AT3G45330              | Concanavalin A-like lectin protein kinase family protein                 |
| AT1G26240              | Proline-rich extensin-like family protein                                |
| AT2G07671              | ATP synthase subunit C family protein                                    |
| AT2G15780              | Cupredoxin superfamily protein                                           |
| AT2G04100              | MATE efflux family protein                                               |
| AT2G15220              | Plant basic secretory protein (BSP) family protein                       |

AT1G64610 Transducin/WD40 repeat-like superfamily protein  
 AT5G27845 transposable element gene  
 AT2G20560 DNAJ heat shock family protein  
 AT1G32970 Subtilisin-like serine endopeptidase family protein  
 AT1G71140 MATE efflux family protein  
 AT2G34210 Transcription elongation factor Spt5  
 AT1G69790 Protein kinase superfamily protein  
 AT3G14205 Phosphoinositide phosphatase family protein  
 AT5G07570 glycine/proline-rich protein  
 AT5G57610 Protein kinase superfamily protein with octicosapeptide/Phox/Bem1p domain  
 AT1G61610 S-locus lectin protein kinase family protein  
 AT3G43110 unknown protein  
 AT2G05580 Glycine-rich protein family  
 AT1G66360 Calcium-dependent lipid-binding (CaLB domain) family protein  
 AT3G45720 Major facilitator superfamily protein  
 AT2G02720 Pectate lyase family protein  
 AT5G38910 RmlC-like cupins superfamily protein  
 AT5G67340 ARM repeat superfamily protein  
 AT5G52710 Copper transport protein family  
 AT4G10060 Beta-glucosidase, GBA2 type family protein  
 AT1G57630 Toll-Interleukin-Resistance (TIR) domain family protein  
 AT1G72890 Disease resistance protein (TIR-NBS class)  
 AT4G39210 (APL3)  
 AT1G12240 (ATBETAFRUCT4)  
 AT1G32200 (ATS1)  
 AT3G28210 (PMZ)  
 AT1G32960 (SBT3.3)  
 AT4G12120 (SEC1B)  
 AT1G68050 FLAVIN-BINDING, KELCH REPEAT, F BOX 1 (FKF1)  
 AT1G72330 ALANINE AMINOTRANSFERASE 2 (ALAAT2)  
 AT4G08870 ARGININE AMIDOHYDROLASE 2 (ARGAH2)  
 AT1G02520 ATP-BINDING CASSETTE B11 (ABCB11)  
 AT2G47000 ATP-BINDING CASSETTE B4 (ABCB4)  
 AT2G29940 ATP-BINDING CASSETTE G31 (ABCG31)  
 AT2G46530 AUXIN RESPONSE FACTOR 11 (ARF11)  
 AT3G28930 AVRRPT2-INDUCED GENE 2 (AIG2)  
 AT2G14580 BASIC PATHOGENESIS-RELATED PROTEIN 1 (PRB1)  
 AT3G03640 BETA GLUCOSIDASE 25 (BGLU25)  
 AT1G67980 CAFFEYOYL-COA 3-O-METHYLTRANSFERASE (CCOAMT)  
 AT1G79400 CATION/H+ EXCHANGER 2 (CHX2)  
 AT1G47960 CELL WALL / VACUOLAR INHIBITOR OF FRUCTOSIDASE 1 (C/VIF1)  
 AT4G23600 CORONATINE INDUCED 1 (CORI3)  
 AT3G21520 DUF679 DOMAIN MEMBRANE PROTEIN 1 (DMP1)  
 AT1G54040 EPITHIOSPECIFIER PROTEIN (ESP)  
 AT1G62540 FLAVIN-MONOOXYGENASE GLUCOSINOLATE S-OXYGENASE 2 (FMO GS-OX2)  
 AT1G62560 FLAVIN-MONOOXYGENASE GLUCOSINOLATE S-OXYGENASE 3 (FMO GS-OX3)  
 AT5G14780 FORMATE DEHYDROGENASE (FDH)  
 AT4G39640 GAMMA-GLUTAMYL TRANSPEPTIDASE 1 (GGT1)  
 AT2G32400 GLUTAMATE RECEPTOR 5 (GLR5)  
 AT1G74590 GLUTATHIONE S-TRANSFERASE TAU 10 (GSTU10)  
 AT3G09270 GLUTATHIONE S-TRANSFERASE TAU 8 (GSTU8)  
 AT1G30560 GLYCEROL-3-PHOSPHATE PERMEASE 3 (G3Pp3)  
 AT2G05520 GLYCINE-RICH PROTEIN 3 (GRP-3)  
 AT2G26150 HEAT SHOCK TRANSCRIPTION FACTOR A2 (HSFA2)  
 AT2G34600 JASMONATE-ZIM-DOMAIN PROTEIN 7 (JAZ7)  
 AT1G55020 LIPOXYGENASE 1 (LOX1)  
 AT5G27600 LONG-CHAIN ACYL-COA SYNTHETASE 7 (LACS7)  
 AT3G14720 MAP KINASE 19 (MPK19)

|           |                                                        |
|-----------|--------------------------------------------------------|
| AT1G54030 | MODIFIED VACUOLE PHENOTYPE 1 (MVP1)                    |
| AT2G11810 | MONOGALACTOSYLDIACYLGLYCEROL SYNTHASE TYPE C (MGDC)    |
| AT4G37670 | N-ACETYL-L-GLUTAMATE SYNTHASE 2 (NAGS2)                |
| AT1G01010 | NAC DOMAIN CONTAINING PROTEIN 1 (NAC001)               |
| AT1G62580 | NITRIC OXIDE-DEPENDENT GUANYLATE CYCLASE 1 (NOGC1)     |
| AT5G22300 | NITRILASE 4 (NIT4)                                     |
| AT1G06160 | OCTADECANOID-RESPONSIVE ARABIDOPSIS AP2/ERF 59 (ORA59) |
| AT1G20860 | PHOSPHATE TRANSPORTER 1;8 (PHT1;8)                     |
| AT2G22860 | PHYTOSULFOKINE 2 PRECURSOR (PSK2)                      |
| AT2G05620 | PROTON GRADIENT REGULATION 5 (PGR5)                    |
| AT2G16430 | PURPLE ACID PHOSPHATASE 10 (PAP10)                     |
| AT3G09910 | RAB GTPASE HOMOLOG C2B (RABC2b)                        |
| AT1G07390 | RECEPTOR LIKE PROTEIN 1 (RLP1)                         |
| AT1G11720 | STARCH SYNTHASE 3 (SS3)                                |
| AT5G20280 | SUCROSE PHOSPHATE SYNTHASE 1F (SPS1F)                  |
| AT3G54670 | TITAN8 (TTN8)                                          |
| AT4G01470 | TONOPLAST INTRINSIC PROTEIN 1;3 (TIP1;3)               |
| AT3G11570 | TRICHOME BIREFRINGENCE-LIKE 8 (TBL8)                   |
| AT1G30530 | UDP-GLUCOSYL TRANSFERASE 78D1 (UGT78D1)                |
| AT4G25960 | ATP-BINDING CASSETTE B2 (ABCB2)                        |
| AT2G04460 | transposable element gene                              |

## Hypermethylated

### Downregulated

| <u>Locus ID</u> | <u>Gene Description</u>                                                                |
|-----------------|----------------------------------------------------------------------------------------|
| AT1G68440       | unknown protein                                                                        |
| AT2G35920       | RNA helicase family protein                                                            |
| AT4G03380       | unknown protein                                                                        |
| AT2G15980       | Tetratricopeptide repeat (TPR)-like superfamily protein                                |
| AT3G53360       | Tetratricopeptide repeat (TPR)-like superfamily protein                                |
| AT3G27870       | ATPase E1-E2 type family protein / haloacid dehalogenase-like hydrolase family protein |
| AT3G45070       | P-loop containing nucleoside triphosphate hydrolases superfamily protein               |
| AT1G43140       | Cullin family protein                                                                  |
| AT1G12730       | GPI transamidase subunit PIG-U                                                         |
| AT4G03100       | Rho GTPase activating protein with PAK-box/P21-Rho-binding domain                      |
| AT5G14120       | Major facilitator superfamily protein                                                  |
| AT3G55160       | unknown protein                                                                        |
| AT5G18030       | SAUR-like auxin-responsive protein family                                              |
| AT2G17525       | Pentatricopeptide repeat (PPR) superfamily protein                                     |
| AT1G72180       | Leucine-rich receptor-like protein kinase family protein                               |
| AT1G21630       | Calcium-binding EF hand family protein                                                 |
| AT5G46460       | Pentatricopeptide repeat (PPR) superfamily protein                                     |
| AT3G46240       | unknown protein                                                                        |
| AT1G29450       | SAUR-like auxin-responsive protein family                                              |
| AT1G50180       | NB-ARC domain-containing disease resistance protein                                    |
| AT2G34100       | unknown protein                                                                        |
| AT1G57770       | FAD/NAD(P)-binding oxidoreductase family protein                                       |
| AT2G10560       | unknown protein                                                                        |
| AT5G26730       | Fasciclin-like arabinogalactan family protein                                          |
| AT3G51870       | Mitochondrial substrate carrier family protein                                         |
| AT3G28690       | Protein kinase superfamily protein                                                     |
| AT1G17600       | Disease resistance protein (TIR-NBS-LRR class) family                                  |
| AT1G19720       | Pentatricopeptide repeat (PPR-like) superfamily protein                                |



AT2G07676 unknown protein  
 AT3G09162 unknown protein  
 AT4G34730 ribosome-binding factor A family protein  
 AT4G00910 Aluminium activated malate transporter family protein  
 AT2G07687 Cytochrome c oxidase, subunit II  
 AT1G63540 hydroxyproline-rich glycoprotein family protein  
 AT2G17930 Phosphatidylinositol 3- and 4-kinase family protein with FAT domain  
 AT5G15780 Pollen Ole e 1 allergen and extensin family protein  
 AT5G41780 myosin heavy chain-related  
 AT5G66520 Tetratricopeptide repeat (TPR)-like superfamily protein  
 AT2G22070 pentatricopeptide (PPR) repeat-containing protein  
 AT1G16800 P-loop containing nucleoside triphosphate hydrolases superfamily protein  
 AT3G47110 Leucine-rich repeat protein kinase family protein  
 AT3G46490 2-oxoglutarate (2OG) and Fe(II)-dependent oxygenase superfamily protein  
 AT3G18840 Tetratricopeptide repeat (TPR)-like superfamily protein  
 AT1G03540 Pentatricopeptide repeat (PPR-like) superfamily protein  
 AT1G79710 Major facilitator superfamily protein  
 AT3G05340 Tetratricopeptide repeat (TPR)-like superfamily protein  
 AT2G07675 Ribosomal protein S12/S23 family protein  
 AT2G07722 unknown protein  
 AT4G08290 nodulin MtN21-like transporter family protein  
 AT5G10340 F-box family protein; CONTAINS InterPro DOMAIN/s  
 AT4G17140 pleckstrin homology (PH) domain-containing protein  
 AT1G24160 unknown protein  
 AT1G53800 unknown protein  
 AT1G74580 Pentatricopeptide repeat (PPR) superfamily protein  
 AT2G05790 O-Glycosyl hydrolases family 17 protein  
 AT2G07751 NADH:ubiquinone/plastoquinone oxidoreductase, chain 3 protein  
 AT5G24350 unknown protein  
 AT5G37130 Protein prenyltransferase superfamily protein  
 AT4G16920 Disease resistance protein (TIR-NBS-LRR class) family  
 AT2G07682 transposable element gene  
 AT3G44755 unknown protein  
 AT2G07777 ATP synthase 9 mitochondria  
 AT4G31210 DNA topoisomerase, type IA, core  
 AT1G73710 Pentatricopeptide repeat (PPR) superfamily protein  
 AT4G19530 Encodes a TIR-NB-LRR resistance protein  
 AT2G19660 Cysteine/Histidine-rich C1 domain family protein  
 AT2G07721 unknown protein  
 AT1G47400 unknown protein  
 AT4G22460 Bifunctional inhibitor/lipid-transfer protein/seed storage 2S albumin superfamily protein  
 AT1G34047 Encodes a defensin-like (DEFL) family protein  
 AT1G49990 F-box family protein  
 AT5G20610 unknown protein  
 AT1G36240 Ribosomal protein L7Ae/L30e/S12e/Gadd45 family protein  
 AT3G14730 Pentatricopeptide repeat (PPR) superfamily protein  
 AT1G67120 nucleoside-triphosphatase  
 AT3G54770 RNA-binding (RRM/RBD/RNP motifs) family protein  
 AT5G14880 Potassium transporter family protein  
 AT5G14020 Endosomal targeting BRO1-like domain-containing protein  
 AT2G30600 BTB/POZ domain-containing protein  
 AT1G22060 unknown protein  
 AT4G20430 Subtilase family protein  
 AT4G36470 S-adenosyl-L-methionine-dependent methyltransferases superfamily protein  
 AT5G44410 FAD-binding Berberine family protein  
 AT5G45230 Disease resistance protein (TIR-NBS-LRR class) family  
 AT2G25730 unknown protein  
 AT3G14460 LRR and NB-ARC domains-containing disease resistance protein

AT3G11964 RNA binding protein  
 AT2G05540 Glycine-rich protein family  
 AT3G06530 ARM repeat superfamily protein  
 AT3G48420 Haloacid dehalogenase-like hydrolase (HAD) superfamily protein  
 AT2G34290 Protein kinase superfamily protein  
 AT3G09080 Transducin/WD40 repeat-like superfamily protein  
 AT4G20362 Potential natural antisense gene  
 AT4G05631 unknown protein  
 AT5G59650 Leucine-rich repeat protein kinase family protein  
 AT3G54580 Proline-rich extensin-like family protein  
 AT2G04795 unknown protein  
 AT4G36140 disease resistance protein (TIR-NBS-LRR class)  
 AT2G14760 basic helix-loop-helix (bHLH) DNA-binding superfamily protein  
 AT5G06670 P-loop containing nucleoside triphosphate hydrolases superfamily protein  
 AT2G07673 unknown protein  
 AT2G15900 Phox-associated domain  
 AT1G44835 YbaK/aminoacyl-tRNA synthetase-associated domain  
 AT4G19980 unknown protein  
 AT5G05400 LRR and NB-ARC domains-containing disease resistance protein  
 AT1G44030 Cysteine/Histidine-rich C1 domain family protein  
 AT2G25900 A. THALIANA TANDEM ZINC FINGER PROTEIN 1 (ATCTH)  
 AT2G01910 (ATMAP65-6)  
 AT4G17460 (HAT1)  
 AT2G28250 (NCRK)  
 AT2G02120 (PDF2.1)  
 AT1G24706 (THO2)  
 AT4G18600 (WAVE5)  
 AT5G06905 CYTOCHROME P450, FAMILY 712, SUBFAMILY A, POLYPEPTIDE 2 (CYP712A2)  
 AT2G25160 CYTOCHROME P450, FAMILY 82, SUBFAMILY F, POLYPEPTIDE 1 (CYP82F1)  
 AT5G28840 GDP-D-MANNOSE 3',5'-EPIMERASE (GME)  
 AT3G47930 L-GALACTONO-1,4-LACTONE DEHYDROGENASE (GLDH)  
 AT2G13540 ABA HYPERSENSITIVE 1 (ABH1)  
 AT3G49290 ABL INTERACTOR-LIKE PROTEIN 2 (ABIL2)  
 AT1G80070 ABNORMAL SUSPENSOR 2 (SUS2)  
 AT2G14170 ALDEHYDE DEHYDROGENASE 6B2 (ALDH6B2)  
 AT1G20650 ALTERED SEED GERMINATION 5 (ASG5)  
 AT1G08430 ALUMINUM-ACTIVATED MALATE TRANSPORTER 1 (ALMT1)  
 AT4G26320 ARABINO GALACTAN PROTEIN 13 (AGP13)  
 AT1G64950 CYTOCHROME P450, FAMILY 89, SUBFAMILY A, POLYPEPTIDE 5 (CYP89A5)  
 AT3G21090 ATP-BINDING CASSETTE G15 (ABCG15)  
 AT4G21760 BETA-GLUCOSIDASE 47 (BGLU47)  
 AT3G02260 BIG (BIG)  
 AT2G01950 BRI1-LIKE 2 (BRL2)  
 AT3G18290 BRUTUS (BTS)  
 AT4G37610 BTB AND TAZ DOMAIN PROTEIN 5 (bt5)  
 AT1G06490 CALLOSE SYNTHASE 7 (CalS7)  
 AT4G35090 CATALASE 2 (CAT2)  
 AT2G22125 CELLULOSE SYNTHASE-INTERACTIVE PROTEIN 1 (CSI1)  
 AT4G00450 CENTER CITY (CCT)  
 AT3G27170 CHLORIDE CHANNEL B (CLC-B)  
 AT5G57180 CHLOROPLAST IMPORT APPARATUS 2 (CIA2)  
 AT2G18760 CHROMATIN REMODELING 8 (CHR8)  
 AT4G09680 CONSERVED TELOMERE MAINTENANCE COMPONENT 1 (CTC1)  
 AT5G45380 DEGRADATION OF UREA 3 (DUR3)  
 AT1G48300 DIACYLGLYCEROL ACYLTRANSFERASE 3 (DGAT3)  
 AT1G01040 DICER-LIKE 1 (DCL1)  
 AT5G37630 EMBRYO DEFECTIVE 2656 (EMB2656)  
 AT5G13010 EMBRYO DEFECTIVE 3011 (EMB3011)

|           |                                                                                    |
|-----------|------------------------------------------------------------------------------------|
| AT5G06640 | EXTENSIN 10 (EXT10)                                                                |
| AT2G24980 | EXTENSIN 6 (EXT6)                                                                  |
| AT4G27030 | FATTY ACID DESATURASE A (FADA)                                                     |
| AT5G46330 | FLAGELLIN-SENSITIVE 2 (FLS2)                                                       |
| AT3G14270 | FORMS APLOID AND BINUCLEATE CELLS 1B (FAB1B)                                       |
| AT5G47820 | FRAGILE FIBER 1 (FRA1)                                                             |
| AT4G09600 | GAST1 PROTEIN HOMOLOG 3 (GASA3)                                                    |
| AT3G60530 | GATA TRANSCRIPTION FACTOR 4 (GATA4)                                                |
| AT3G07160 | GLUCAN SYNTHASE-LIKE 10 (GSL10)                                                    |
| AT2G31960 | GLUCAN SYNTHASE-LIKE 3 (GSL03)                                                     |
| AT3G47340 | GLUTAMINE-DEPENDENT ASPARAGINE SYNTHASE 1 (ASN1)                                   |
| AT3G42640 | H(+)-ATPASE 8 (HA8)                                                                |
| AT4G30110 | HEAVY METAL ATPASE 2 (HMA2)                                                        |
| AT1G71920 | HISTIDINE BIOSYNTHESIS 6B (HISN6B)                                                 |
| AT1G16710 | HISTONE ACETYLTRANSFERASE OF THE CBP FAMILY 12 (HAC12)                             |
| AT5G13530 | KEEP ON GOING (KEG)                                                                |
| AT4G18120 | MEI2-LIKE 3 (ML3)                                                                  |
| AT2G17780 | MID1-COMPLEMENTING ACTIVITY 2 (MCA2)                                               |
| AT4G08480 | MITOGEN-ACTIVATED PROTEIN KINASE KINASE KINASE 9 (MAPKKK9)                         |
| AT2G16640 | MULTIMERIC TRANSLOCON COMPLEX IN THE OUTER ENVELOPE MEMBRANE 132<br>(TOC132)       |
| AT5G54280 | MYOSIN 2 (ATM2)                                                                    |
| AT4G37590 | NAKED PINS IN YUC MUTANTS 5 (NPY5)                                                 |
| AT4G14760 | NETWORKED 1B (NET1B)                                                               |
| AT4G02710 | NETWORKED 1C (NET1C)                                                               |
| AT5G04950 | NICOTIANAMINE SYNTHASE 1 (NAS1)                                                    |
| AT1G32450 | NITRATE TRANSPORTER 1.5 (NRT1.5)                                                   |
| AT1G08090 | NITRATE TRANSPORTER 2:1 (NRT2:1)                                                   |
| AT1G60800 | NSP-INTERACTING KINASE 3 (NIK3)                                                    |
| AT4G32850 | NUCLEAR POLY(A) POLYMERASE (nPAP)                                                  |
| AT1G79280 | NUCLEAR PORE ANCHOR (NUA)                                                          |
| AT4G16370 | OLIGOPEPTIDE TRANSPORTER (OPT3)                                                    |
| AT1G34355 | PARALLEL SPINDLE 1 (PS1)                                                           |
| AT5G01180 | PEPTIDE TRANSPORTER 5 (PTR5)                                                       |
| AT5G04230 | PHENYL ALANINE AMMONIA-LYASE 3 (PAL3)                                              |
| AT1G32060 | PHOSPHORIBULOKINASE (PRK)                                                          |
| AT5G52920 | PLASTIDIC PYRUVATE KINASE BETA SUBUNIT 1 (PKP-BETA1)                               |
| AT2G01918 | PSBQ-LIKE 3 (PQL3)                                                                 |
| AT1G74260 | PURINE BIOSYNTHESIS 4 (PUR4)                                                       |
| AT4G30710 | QWRF DOMAIN CONTAINING 8 (QWRF8)                                                   |
| AT1G67500 | RECOVERY PROTEIN 3 (REV3)                                                          |
| AT1G67710 | RESPONSE REGULATOR 11 (ARR11)                                                      |
| AT3G27670 | RESURRECTION1 (RST1)                                                               |
| AT3G10710 | ROOT HAIR SPECIFIC 12 (RHS12)                                                      |
| AT2G39730 | RUBISCO ACTIVASE (RCA)                                                             |
| AT1G02500 | S-ADENOSYLMETHIONINE SYNTHETASE 1 (SAM1)                                           |
| AT2G38440 | SCAR HOMOLOG 2 (SCAR2)                                                             |
| AT3G26030 | SERINE/THREONINE PROTEIN PHOSPHATASE 2A 55 KDA REGULATORY SUBUNIT<br>B PRIME DELTA |
| AT4G15180 | SET DOMAIN PROTEIN 2 (SDG2)                                                        |
| AT5G42400 | SET DOMAIN PROTEIN 25 (SDG25)                                                      |
| AT1G62280 | SLAC1 HOMOLOGUE 1 (SLAH1)                                                          |
| AT4G16340 | SPIKE1 (SPK1)                                                                      |
| AT3G13065 | STRUBBELIG-RECEPTOR FAMILY 4 (SRF4)                                                |
| AT1G20840 | TONOPLAST MONOSACCHARIDE TRANSPORTER1 (TMT1)                                       |
| AT5G63920 | TOPOISOMERASE 3ALPHA (TOP3A)                                                       |
| AT1G70290 | TREHALOSE-6-PHOSPHATASE SYNTHASE S8 (TPS8)                                         |
| AT5G01360 | TRICHOME BIREFRINGENCE-LIKE 3 (TBL3)                                               |

|           |                                       |
|-----------|---------------------------------------|
| AT1G55860 | UBIQUITIN-PROTEIN LIGASE 1 (UPL1)     |
| AT5G40850 | UROPHORPHYRIN METHYLASE 1 (UPM1)      |
| AT4G07400 | VIER F-BOX PROTEINE 3 (VFB3)          |
| AT1G16160 | WALL ASSOCIATED KINASE-LIKE 5 (WAKL5) |
| AT3G06290 | YEAST SAC3 HOMOLOG B (SAC3B)          |
| AT5G13740 | ZINC INDUCED FACILITATOR 1 (ZIF1)     |
| AT5G45105 | ZINC TRANSPORTER 8 PRECURSOR (ZIP8)   |

## Hypomethylated

### Upregulated

| <b>Locus ID</b> | <b>Gene Description</b>                                                 |
|-----------------|-------------------------------------------------------------------------|
| AT1G36622       | unknown protein                                                         |
| AT5G02180       | Transmembrane amino acid transporter family protein                     |
| AT2G45920       | U-box domain-containing protein                                         |
| AT2G18150       | Peroxidase superfamily protein                                          |
| AT3G47480       | Calcium-binding EF-hand family protein                                  |
| AT2G16676       | unknown protein                                                         |
| AT4G27850       | Glycine-rich protein family                                             |
| AT1G61370       | S-locus lectin protein kinase family protein                            |
| AT2G17500       | Auxin efflux carrier family protein                                     |
| AT2G04495       | unknown protein                                                         |
| AT2G47950       | unknown protein                                                         |
| AT5G15480       | C2H2-type zinc finger family protein                                    |
| AT4G01700       | Chitinase family protein                                                |
| AT1G21930       | unknown protein                                                         |
| AT1G26390       | FAD-binding Berberine family protein                                    |
| AT2G18690       | unknown protein                                                         |
| AT1G03940       | HXXXD-type acyl-transferase family protein                              |
| AT1G70130       | Concanavalin A-like lectin protein kinase family protein                |
| AT2G20320       | DENN (AEX-3) domain-containing protein                                  |
| AT5G35050       | Domain of unknown function DUF1985                                      |
| AT2G42980       | Eukaryotic aspartyl protease family protein                             |
| AT4G01350       | Cysteine/Histidine-rich C1 domain family protein                        |
| AT2G22930       | UDP-Glycosyltransferase superfamily protein                             |
| AT3G49980       | F-box and associated interaction domains-containing protein             |
| AT4G00500       | alpha/beta-Hydrolases superfamily protein                               |
| AT4G08450       | Disease resistance protein (TIR-NBS-LRR class) family                   |
| AT4G28930       | unknown protein                                                         |
| AT4G10500       | 2-oxoglutarate (2OG) and Fe(II)-dependent oxygenase superfamily protein |
| AT3G14470       | NB-ARC domain-containing disease resistance protein                     |
| AT5G47980       | HXXXD-type acyl-transferase family protein                              |
| AT2G14878       | other RNA                                                               |
| AT1G26410       | FAD-binding Berberine family protein                                    |
| AT1G21529       | other RNA                                                               |
| AT3G22850       | Aluminium induced protein with YGL and LRDR motifs                      |
| AT2G36730       | Pentatricopeptide repeat (PPR) superfamily protein                      |
| AT2G04400       | Aldolase-type TIM barrel family protein                                 |
| AT1G61360       | S-locus lectin protein kinase family protein                            |
| AT5G35425       | transposable element gene                                               |
| AT1G02470       | Polyketide cyclase/dehydrase and lipid transport superfamily protein    |
| AT4G33770       | Inositol 1,3,4-trisphosphate 5/6-kinase family protein                  |
| AT5G25260       | SPFH/Band 7/PHB domain-containing membrane-associated protein family    |
| AT4G14368       | Regulator of chromosome condensation (RCC1) family protein              |
| AT5G63680       | Pyruvate kinase family protein                                          |

AT5G52700 Copper transport protein family  
 AT5G45720 AAA-type ATPase family protein  
 AT3G03790 ankyrin repeat family protein / regulator of chromosome condensation (RCC1) family protein  
 AT4G02320 Plant invertase/pectin methylesterase inhibitor superfamily  
 AT2G38250 Homeodomain-like superfamily protein  
 AT1G74270 Ribosomal protein L35Ae family protein  
 AT3G14700 SART-1 family  
 AT5G45000 Disease resistance protein (TIR-NBS-LRR class) family  
 AT3G43250 Family of unknown function (DUF572)  
 AT1G13340 Regulator of Vps4 activity in the MVB pathway protein  
 AT1G62760 Plant invertase/pectin methylesterase inhibitor superfamily protein  
 AT4G05140 Nucleoside transporter family protein  
 AT2G36724 unknown protein  
 AT2G18720 Translation elongation factor EF1A/initiation factor IF2gamma family protein  
 AT5G14120 Major facilitator superfamily protein  
 AT4G15540 nodulin MtN21-like transporter family protein  
 AT5G58620 zinc finger (CCCH-type) family protein  
 AT1G08590 similar to CLV1-like leucine rich repeat transmembrane receptor-like protein kinase  
 AT3G25610 ATPase E1-E2 type family protein / haloacid dehalogenase-like hydrolase family protein  
 AT5G23950 Calcium-dependent lipid-binding (CaLB domain) family protein  
 AT3G09830 Protein kinase superfamily protein  
 AT3G15518 unknown protein  
 AT5G15070 Phosphoglycerate mutase-like family protein  
 AT3G19970 alpha/beta-Hydrolases superfamily protein  
 AT3G26614 transposable element gene; non-LTR retrotransposon family (LINE)  
 AT1G26420 FAD-binding Berberine family protein  
 AT1G63540 hydroxyproline-rich glycoprotein family protein  
 AT4G38560 Arabidopsis phospholipase-like protein (PEARL1 4) family  
 AT2G16230 O-Glycosyl hydrolases family 17 protein  
 AT3G30340 nodulin MtN21-like transporter family protein  
 AT1G63530 hydroxyproline-rich glycoprotein family protein  
 AT3G29970 B12D protein  
 AT4G22217 Encodes a defensin-like (DEFL) family protein  
 AT5G17390 Adenine nucleotide alpha hydrolases-like superfamily protein  
 AT1G49800 unknown protein  
 AT4G32250 Protein kinase superfamily protein  
 AT1G28180 P-loop containing nucleoside triphosphate hydrolases superfamily protein  
 AT5G25930 Protein kinase family protein with leucine-rich repeat domain  
 AT4G36430 Peroxidase superfamily protein  
 AT3G44510 alpha/beta-Hydrolases superfamily protein  
 AT1G13470 Protein of unknown function (DUF1262)  
 AT4G39675 unknown protein  
 AT5G53048 Potential natural antisense gene  
 AT1G33030 O-methyltransferase family protein  
 AT1G35625 RING/U-box superfamily protein  
 AT1G26380 FAD-binding Berberine family protein  
 AT2G07678 unknown protein  
 AT5G27950 P-loop containing nucleoside triphosphate hydrolases superfamily protein  
 AT5G55410 Bifunctional inhibitor/lipid-transfer protein/seed storage 2S albumin superfamily protein  
 AT3G63380 ATPase E1-E2 type family protein / haloacid dehalogenase-like hydrolase family protein  
 AT2G15830 unknown protein  
 AT5G14550 Core-2/l-branching beta-1,6-N-acetylglucosaminyltransferase family protein  
 AT4G10720 Ankyrin repeat family protein  
 AT5G26690 Heavy metal transport/detoxification superfamily protein  
 AT4G20210 Terpenoid cyclases/Protein prenyltransferases superfamily protein  
 AT1G61550 S-locus lectin protein kinase family protein  
 AT2G16870 Disease resistance protein (TIR-NBS-LRR class) family

AT3G10320 Glycosyltransferase family 61 protein  
 AT2G04070 MATE efflux family protein  
 AT4G15120 VQ motif-containing protein  
 AT2G14290 Protein of unknown function  
 AT5G53110 RING/U-box superfamily protein  
 AT1G08310 alpha/beta-Hydrolases superfamily protein  
 AT1G55790 Heavy metal transport/detoxification protein  
 AT1G32950 Subtilase family protein  
 AT1G43910 P-loop containing nucleoside triphosphate hydrolases superfamily protein  
 AT3G62590 alpha/beta-Hydrolases superfamily protein  
 AT4G22470 protease inhibitor/seed storage/lipid transfer protein (LTP) family protein  
 AT4G21390 (B120)  
 AT2G22770 (NAI1)  
 AT5G64000 (SAL2)  
 AT3G21700 (SGP2)  
 AT3G57240 BETA-1,3-GLUCANASE 3 (BG3)  
 AT3G48300 CYTOCHROME P450, FAMILY 71, SUBFAMILY A, POLYPEPTIDE 23 (CYP71A23)  
 AT4G37370 CYTOCHROME P450, FAMILY 81, SUBFAMILY D, POLYPEPTIDE 8 (CYP81D8)  
 AT3G56000 CELLULOSE SYNTHASE LIKE A14 (CSLA14)  
 AT3G05690 NUCLEAR FACTOR Y, SUBUNIT A2 (NF-YA2)  
 AT4G39980 3-DEOXY-D-ARABINO-HEPTULOSONATE 7-PHOSPHATE SYNTHASE 1 (DHS1)  
 AT2G05710 ACONITASE 3 (ACO3)  
 AT3G51970 ACYL-COA STEROL ACYL TRANSFERASE 1 (ASAT1)  
 AT1G17290 ALANINE AMINOTRANSFERAS (AlaAT1)  
 AT5G20960 ALDEHYDE OXIDASE 1 (AO1)  
 AT5G05730 ANTHRANILATE SYNTHASE ALPHA SUBUNIT 1 (ASA1)  
 AT4G04610 APS REDUCTASE 1 (APR1)  
 AT4G09030 ARABINOGLACTAN PROTEIN 10 (AGP10)  
 AT2G22470 ARABINOGLACTAN PROTEIN 2 (AGP2)  
 AT3G59140 ATP-BINDING CASSETTE C10 (ABCC10)  
 AT3G13100 ATP-BINDING CASSETTE C7 (ABCC7)  
 AT5G13320 AVRPPHB SUSCEPTIBLE 3 (PBS3)  
 AT1G61810 BETA-GLUCOSIDASE 45 (BGLU45)  
 AT5G17860 CALCIUM EXCHANGER 7 (CAX7)  
 AT5G58940 CALMODULIN-BINDING RECEPTOR-LIKE CYTOPLASMIC KINASE 1 (CRCK1)  
 AT4G23700 CATION/H+ EXCHANGER 17 (CHX17)  
 AT1G29230 CBL-INTERACTING PROTEIN KINASE 18 (CIPK18)  
 AT1G21250 CELL WALL-ASSOCIATED KINASE (WAK1)  
 AT1G01340 CYCLIC NUCLEOTIDE GATED CHANNEL 10 (CNGC10)  
 AT3G17690 CYCLIC NUCLEOTIDE GATED CHANNEL 19 (CNGC19)  
 AT4G04490 CYSTEINE-RICH RLK (RECEPTOR-LIKE PROTEIN KINASE) 36 (CRK36)  
 AT4G04510 CYSTEINE-RICH RLK (RECEPTOR-LIKE PROTEIN KINASE) 38 (CRK38)  
 AT4G04540 CYSTEINE-RICH RLK (RECEPTOR-LIKE PROTEIN KINASE) 39 (CRK39)  
 AT2G39770 CYTOKINESIS DEFECTIVE 1 (CYT1)  
 AT2G04040 DETOXIFICATION 1 (DTX1)  
 AT4G25640 DETOXIFYING EFFLUX CARRIER 35 (DTX35)  
 AT3G11670 DIGALACTOSYL DIACYLGLYCEROL DEFICIENT 1 (DGD1)  
 AT4G34200 EMBRYO SAC DEVELOPMENT ARREST 9 (EDA9)  
 AT4G00900 ER-TYPE CA2+-ATPASE 2 (ECA2)  
 AT5G25250 FLOTILLIN 1 (FLOT1)  
 AT4G15200 FORMIN 3 (FH3)  
 AT1G70140 FORMIN 8 (FH8)  
 AT5G39190 GERMIN-LIKE PROTEIN 2 (GER2)  
 AT1G78360 GLUTATHIONE S-TRANSFERASE TAU 21 (GSTU21)  
 AT3G47420 GLYCEROL-3-PHOSPHATE PERMEASE 1 (G3Pp1)  
 AT4G28490 HAESA (HAE)  
 AT4G37680 HEPTAHELICAL PROTEIN 4 (HHP4)  
 AT1G51760 IAA-ALANINE RESISTANT 3 (IAR3)

AT1G51800 IMPAIRED OOMYCETE SUSCEPTIBILITY 1 (IOS1)  
 AT3G45140 LIPOXYGENASE 2 (LOX2)  
 AT1G17420 LIPOXYGENASE 3 (LOX3)  
 AT2G36530 LOW EXPRESSION OF OSMOTICALLY RESPONSIVE GENES 2 (LOS2)  
 AT3G46330 MATERNAL EFFECT EMBRYO ARREST 39 (MEE39)  
 AT2G47275 MICRORNA403 (MIR403)  
 AT3G59884 MICRORNA827A (MIR827A)  
 AT2G25680 MOLYBDATE TRANSPORTER 1 (MOT1)  
 AT5G20410 MONOGALACTOSYLDIACYLGLYCEROL SYNTHASE 2 (MGD2)  
 AT2G19900 NADP-MALIC ENZYME 1 (NADP-ME1)  
 AT2G22560 NETWORKED 2D (NET2D)  
 AT1G37130 NITRATE REDUCTASE 2 (NIA2)  
 AT1G31885 NOD26-LIKE INTRINSIC PROTEIN 3;1 (NIP3;1)  
 AT1G63020 NUCLEAR RNA POLYMERASE D1A (NRPD1A)  
 AT3G61990 O-MTASE FAMILY 3 PROTEIN (OMTF3)  
 AT1G16370 ORGANIC CATION/CARNITINE TRANSPORTER 6 (OCT6)  
 AT1G73220 ORGANIC CATION/CARNITINE TRANSPORTER1 (OCT1)  
 AT3G20660 ORGANIC CATION/CARNITINE TRANSPORTER4 (OCT4)  
 AT5G39050 PHENOLIC GLUCOSIDE MALONYLTRANSFERASE 1 (PMAT1)  
 AT2G40180 PHOSPHATASE 2C5 (PP2C5)  
 AT5G43350 PHOSPHATE TRANSPORTER 1;1 (PHT1;1)  
 AT3G54700 PHOSPHATE TRANSPORTER 1;7 (PHT1;7)  
 AT1G53310 PHOSPHOENOLPYRUVATE CARBOXYLASE 1 (PPC1)  
 AT5G56630 PHOSPHOFRUCTOKINASE 7 (PFK7)  
 AT2G26560 PHOSPHOLIPASE A 2A (PLA2A)  
 AT3G05630 PHOSPHOLIPASE D P2 (PLDP2)  
 AT3G26840 PHYTYL ESTER SYNTHASE 2 (PES2)  
 AT2G26010 PLANT DEFENSIN 1.3 (PDF1.3)  
 AT2G18660 PLANT NATRIURETIC PEPTIDE A (PNP-A)  
 AT1G52940 PURPLE ACID PHOSPHATASE 5 (PAP5)  
 AT3G53620 PYROPHOSPHORYLASE 4 (PPa4)  
 AT3G26090 REGULATOR OF G-PROTEIN SIGNALING 1 (RGS1)  
 AT4G21470 RIBOFLAVIN KINASE/FMN HYDROLASE (FMN/FHY)  
 AT1G12210 RPS5-LIKE 1 (RFL1)  
 AT1G11180 SECRETORY CARRIER MEMBRANE PROTEIN 2 (SCAMP2)  
 AT3G08720 SERINE/THREONINE PROTEIN KINASE 2 (S6K2)  
 AT2G26660 SPX DOMAIN GENE 2 (SPX2)  
 AT4G08390 STROMAL ASCORBATE PEROXIDASE (SAPX)  
 AT5G66760 SUCCINATE DEHYDROGENASE 1-1 (SDH1-1)  
 AT3G43190 SUCROSE SYNTHASE 4 (SUS4)  
 AT1G66570 SUCROSE-PROTON SYMPORTER 7 (SUC7)  
 AT4G02050 SUGAR TRANSPORTER PROTEIN 7 (STP7)  
 AT1G22150 SULFATE TRANSPORTER 1;3 (SULTR1;3)  
 AT4G33030 SULFOQUINOVOSYLDIACYLGLYCEROL 1 (SQD1)  
 AT1G74100 SULFOTRANSFERASE 16 (SOT16)  
 AT5G54810 TRYPTOPHAN SYNTHASE BETA-SUBUNIT 1 (TSB1)  
 AT4G23920 UDP-D-GLUCOSE/UDP-D-GALACTOSE 4-EPIMERASE 2 (UGE2)  
 AT3G56040 UDP-GLUCOSE PYROPHOSPHORYLASE 3 (UGP3)  
 AT2G36750 UDP-GLUCOSYL TRANSFERASE 73C1 (UGT73C1)  
 AT3G53150 UDP-GLUCOSYL TRANSFERASE 73D1 (UGT73D1)  
 AT1G24100 UDP-GLUCOSYL TRANSFERASE 74B1 (UGT74B1)  
 AT1G05620 URIDINE-RIBOHYDROLASE 2 (URH2)  
 AT1G21240 WALL ASSOCIATED KINASE 3 (WAK3)  
 AT1G21230 WALL ASSOCIATED KINASE 5 (WAK5)  
 AT1G80840 WRKY DNA-BINDING PROTEIN 40 (WRKY40)  
 AT5G24380 YELLOW STRIPE LIKE 2 (YSL2)

## Hypomethylated

### Downregulated

| <u>Locus ID</u> | <u>Gene Description</u>                                                                                   |
|-----------------|-----------------------------------------------------------------------------------------------------------|
| AT2G47020       | Peptide chain release factor 1                                                                            |
| AT2G32500       | Stress responsive alpha-beta barrel domain protein                                                        |
| AT1G74290       | alpha/beta-Hydrolases superfamily protein                                                                 |
| AT4G16900       | Disease resistance protein (TIR-NBS-LRR class) family                                                     |
| AT2G17033       | pentatricopeptide (PPR) repeat-containing protein                                                         |
| AT1G29560       | Zinc finger C-x8-C-x5-C-x3-H type family protein                                                          |
| AT2G03140       | alpha/beta-Hydrolases superfamily protein                                                                 |
| AT5G28415       | transposable element gene                                                                                 |
| AT1G02890       | AAA-type ATPase family protein                                                                            |
| AT1G12020       | unknown protein                                                                                           |
| AT4G26680       | Tetratricopeptide repeat (TPR)-like superfamily protein                                                   |
| AT5G44578       | unknown protein                                                                                           |
| AT5G26670       | Pectinacetyltransferase family protein                                                                    |
| AT4G08300       | nodulin MtN21-like transporter family protein                                                             |
| AT5G51150       | Mitochondrial import inner membrane translocase subunit Tim17/Tim22/Tim23 family protein                  |
| AT2G15020       | unknown protein                                                                                           |
| AT2G21045       | Rhodanese/Cell cycle control phosphatase superfamily protein                                              |
| AT4G21250       | Sulfite exporter TauE/SafE family protein                                                                 |
| AT1G66180       | Putative aspartyl protease (ASP)                                                                          |
| AT1G68400       | leucine-rich repeat transmembrane protein kinase family protein                                           |
| AT5G49152       | Potential natural antisense gene                                                                          |
| AT5G28262       | Unknown gene                                                                                              |
| AT1G63100       | GRAS family transcription factor                                                                          |
| AT5G17165       | unknown protein                                                                                           |
| AT4G16008       | unknown protein                                                                                           |
| AT5G25040       | Major facilitator superfamily protein                                                                     |
| AT5G15360       | unknown protein                                                                                           |
| AT5G19740       | Peptidase M28 family protein                                                                              |
| AT3G52490       | Double Clp-N motif-containing P-loop nucleoside triphosphate hydrolases superfamily protein               |
| AT1G50050       | CAP (Cysteine-rich secretory proteins, Antigen 5, and Pathogenesis-related 1 protein) superfamily protein |
| AT3G50370       | unknown protein                                                                                           |
| AT2G26215       | transposable element gene                                                                                 |
| AT2G15880       | Leucine-rich repeat (LRR) family protein                                                                  |
| AT3G63070       | Tudor/PWWP/MBT domain-containing protein                                                                  |
| AT5G57100       | Nucleotide/sugar transporter family protein                                                               |
| AT3G53680       | Acyl-CoA N-acyltransferase with RING/FYVE/PHD-type zinc finger domain                                     |
| AT1G30870       | Peroxidase superfamily protein                                                                            |
| AT3G04450       | Homeodomain-like superfamily protein                                                                      |
| AT4G28410       | Tyrosine transaminase family protein                                                                      |
| AT5G28630       | glycine-rich protein                                                                                      |
| AT5G59070       | UDP-Glycosyltransferase superfamily protein                                                               |
| AT3G01345       | Expressed protein                                                                                         |
| AT5G13770       | Pentatricopeptide repeat (PPR-like) superfamily protein                                                   |
| AT5G67385       | Phototropic-responsive NPH3 family protein                                                                |
| AT4G01330       | Protein kinase superfamily protein                                                                        |
| AT1G67900       | Phototropic-responsive NPH3 family protein                                                                |
| AT5G24155       | FAD/NAD(P)-binding oxidoreductase family protein                                                          |
| AT5G27890       | myosin heavy chain-related protein                                                                        |
| AT4G18250       | receptor serine/threonine kinase, putative                                                                |



AT3G46600 GRAS family transcription factor  
 AT5G35170 adenylate kinase family protein  
 AT5G04960 Plant invertase/pectin methylesterase inhibitor superfamily  
 AT3G26490 Phototropic-responsive NPH3 family protein  
 AT1G17450 B-block binding subunit of TFIIIC  
 AT2G15960 unknown protein  
 AT5G10800 RNA recognition motif (RRM)-containing protein  
 AT2G05632 unknown protein  
 AT1G78020 Protein of unknown function (DUF581)  
 AT1G33640 unknown protein  
 AT1G64310 Tetratricopeptide repeat (TPR)-like superfamily protein  
 AT3G24190 Protein kinase superfamily protein  
 AT4G02660 Beige/BEACH domain ;WD domain, G-beta repeat protein  
 AT1G62310 transcription factor jumonji (jmjC) domain-containing protein  
 AT2G16270 unknown protein  
 AT3G16180 Major facilitator superfamily protein  
 AT3G18845 Encodes a Protease inhibitor/seed storage/LTP family protein [pseudogene]  
 AT1G67870 glycine-rich protein  
 AT5G38000 Zinc-binding dehydrogenase family protein  
 AT5G37010 unknown protein  
 AT2G32240 Protein coding  
 AT3G01310 Phosphoglycerate mutase-like family protein  
 AT4G38340 Plant regulator RWP-RK family protein  
 AT5G46450 Disease resistance protein (TIR-NBS-LRR class) family  
 AT3G22142 Encodes a Protease inhibitor/seed storage/LTP family protein  
 AT1G26270 Phosphatidylinositol 3- and 4-kinase family protein  
 AT5G07570 glycine/proline-rich protein  
 AT1G09460 Carbohydrate-binding X8 domain superfamily protein  
 AT5G02860 Pentatricopeptide repeat (PPR) superfamily protein  
 AT4G15590 transposable element gene  
 AT1G50732 unknown protein.  
 AT5G52790 Protein coding  
 AT1G52870 Peroxisomal membrane 22 kDa (Mpv17/PMP22) family protein  
 AT4G20820 FAD-binding Berberine family protein  
 AT1G74770 zinc ion binding protein  
 AT1G27180 disease resistance protein (TIR-NBS-LRR class), putative  
 AT2G16140 transposable element gene  
 AT5G44530 Subtilase family protein  
 AT1G61760 Late embryogenesis abundant (LEA) hydroxyproline-rich glycoprotein family  
 AT3G07070 Protein kinase superfamily protein  
 AT3G22275 unknown protein  
 AT1G35660 unknown protein  
 AT1G52320 unknown protein  
 AT3G22150 Tetratricopeptide repeat (TPR)-like superfamily protein  
 AT1G64720 membrane related protein CP5 (CP5)  
 AT4G04930 (DES-1-LIKE)  
 AT2G31970 (RAD50)  
 AT1G20080 (SYTB)  
 AT5G28080 (WNK9)  
 AT5G36120 COFACTOR ASSEMBLY, COMPLEX C (B6F) (CCB3)  
 AT3G48290 CYTOCHROME P450, FAMILY 71, SUBFAMILY A, POLYPEPTIDE 24 (CYP71A24)  
 AT3G26310 CYTOCHROME P450, FAMILY 71, SUBFAMILY B, POLYPEPTIDE 35 (CYP71B35)  
 AT3G14630 CYTOCHROME P450, FAMILY 72, SUBFAMILY A, POLYPEPTIDE 9 (CYP72A9)  
 AT1G24540 CYTOCHROME P450, FAMILY 86, SUBFAMILY C, POLYPEPTIDE 1 (CYP86C1)  
 AT1G49720 ABSCISIC ACID RESPONSIVE ELEMENT-BINDING FACTOR 1 (ABF1)  
 AT1G76990 ACT DOMAIN REPEAT 3 (ACR3)  
 AT5G40820 ATAXIA TELANGIECTASIA-MUTATED AND RAD3-RELATED (ATR)  
 AT4G01820 ATP-BINDING CASSETTE B3 (ATCB3)

|           |                                                       |
|-----------|-------------------------------------------------------|
| AT1G30410 | ATP-BINDING CASSETTE C12 (ABCC12)                     |
| AT1G19220 | AUXIN RESPONSE FACTOR 19 (ARF19)                      |
| AT2G28470 | BETA-GALACTOSIDASE 8 (BGAL8)                          |
| AT3G25690 | CHLOROPLAST UNUSUAL POSITIONING 1 (CHUP1)             |
| AT5G52100 | CHLORORESPIRATION REDUCTION 1 (crr1)                  |
| AT3G42670 | CHROMATIN REMODELING 38 (CHR38)                       |
| AT4G19020 | CHROMOMETHYLASE 2 (CMT2)                              |
| AT2G28190 | COPPER/ZINC SUPEROXIDE DISMUTASE 2 (CSD2)             |
| AT4G08920 | CRYPTOCHROME 1 (CRY1)                                 |
| AT2G26760 | CYCLIN B1;4 (CYCB1;4)                                 |
| AT3G21870 | CYCLIN P2;1 (CYCP2;1)                                 |
| AT3G01480 | CYCLOPHILIN 38 (CYP38)                                |
| AT4G14140 | DNA METHYLTRANSFERASE 2 (DMT2)                        |
| AT3G05680 | EMBRYO DEFECTIVE 2016 (EMB2016)                       |
| AT3G04340 | EMBRYO DEFECTIVE 2458 (emb2458)                       |
| AT5G19820 | EMBRYO DEFECTIVE 2734 (emb2734)                       |
| AT4G05520 | EPS15 HOMOLOGY DOMAIN 2 (EHD2)                        |
| AT4G13390 | EXTENSIN 12 (EXT12)                                   |
| AT3G17320 | F-BOX OVEREXPRESSED/OPPRESSED ABA SIGNALING 1 (FOA1)  |
| AT1G50240 | FUSED (FU)                                            |
| AT2G24720 | GLUTAMATE RECEPTOR 2.2 (GLR2.2)                       |
| AT5G24920 | GLUTAMINE DUMPER 5 (GDU5)                             |
| AT4G04330 | HOMOLOGUE OF CYANOBACTERIAL RBCX 1 (RbcX1)            |
| AT5G64390 | HUA ENHANCER 4 (HEN4)                                 |
| AT3G54590 | HYDROXYPROLINE-RICH GLYCOPROTEIN (HRGP1)              |
| AT5G55250 | IAA CARBOXYLMETHYLTRANSFERASE 1 (IAMT1)               |
| AT4G16480 | INOSITOL TRANSPORTER 4 (INT4)                         |
| AT1G05360 | KILLING ME SLOWLY 2 (KMS2)                            |
| AT2G46740 | L -GULONO-1,4-LACTONE ( L -GULL) OXIDASE 5 (GULLO5)   |
| AT4G10340 | LIGHT HARVESTING COMPLEX OF PHOTOSYSTEM II 5 (LHCB5)  |
| AT4G25560 | LONG AFTER FAR-RED LIGHT 1 (LAF1)                     |
| AT3G58810 | METAL TOLERANCE PROTEIN A2 (MTPA2)                    |
| AT5G35407 | MICRORNA396B (MIR396B)                                |
| AT3G60840 | MICROTUBULE-ASSOCIATED PROTEIN 65-4 (MAP65-4)         |
| AT2G01530 | MLP-LIKE PROTEIN 329 (MLP329)                         |
| AT3G08500 | MYB DOMAIN PROTEIN 83 (MYB83)                         |
| AT1G70760 | NADH DEHYDROGENASE-LIKE COMPLEX L (NdhL)              |
| AT2G23050 | NAKED PINS IN YUC MUTANTS 4 (NPY4)                    |
| AT5G09660 | PEROXISOMAL NAD-MALATE DEHYDROGENASE 2 (PMDH2)        |
| AT2G34710 | PHABULOSA (PHB)                                       |
| AT2G33770 | PHOSPHATE 2 (PHO2)                                    |
| AT5G26570 | PHOSPHOGLUCAN WATER DIKINASE (PWD)                    |
| AT1G61520 | PHOTOSYSTEM I LIGHT HARVESTING COMPLEX GENE 3 (LHCA3) |
| AT1G50840 | POLYMERASE GAMMA 2 (POLGAMMA2)                        |
| AT2G18470 | PROLINE-RICH EXTENSIN-LIKE RECEPTOR KINASE 4 (PERK4)  |
| AT5G02310 | PROTEOLYSIS 6 (PRT6)                                  |
| AT1G30510 | ROOT FNR 2 (RFNR2)                                    |
| AT3G55980 | SALT-INDUCIBLE ZINC FINGER 1 (SZF1)                   |
| AT5G63780 | SHOOT APICAL MERISTEM ARREST 1 (SHA1)                 |
| AT4G11110 | SPA1-RELATED 2 (SPA2)                                 |
| AT1G53160 | SQUAMOSA PROMOTER BINDING PROTEIN-LIKE 4 (SPL4)       |
| AT3G02850 | STELAR K+ OUTWARD RECTIFIER (SKOR)                    |
| AT1G04110 | STOMATAL DENSITY AND DISTRIBUTION 1 (SDD1)            |
| AT1G12280 | SUPPRESSOR OF MKK1 MKK2 2 (SUMM2)                     |
| AT4G16890 | SUPPRESSOR OF NPR1-1, CONSTITUTIVE 1 (SNC1)           |
| AT2G29630 | THIAMINC (THIC)                                       |
| AT5G46700 | TORNADO 2 (TRN2)                                      |
| AT1G70320 | UBIQUITIN-PROTEIN LIGASE 2 (UPL2)                     |

AT3G48260  
AT5G55820  
AT1G65730

WITH NO LYSINE (K) KINASE 3 (WNK3)  
WYRD (WYR)  
YELLOW STRIPE LIKE 7 (YSL7)

**Table S6.** Representative Pi starvation genes targeted by P factor DmCs (Pf-methDEGs). Arabidopsis Locus ID and Gene Descriptions of Pf-methDEGs are shown.

| <u>Locus ID</u> | <u>Gene Description</u>                                                     |
|-----------------|-----------------------------------------------------------------------------|
| AT3G47420       | PHOSPHATE STARVATION-INDUCED GENE 3 ( <i>PS3</i> ) <sup>Hypo, Up</sup>      |
| AT1G67710       | RESPONSE REGULATOR 11 ( <i>ARR11</i> ) <sup>Hyper, Down</sup>               |
| AT3G59884       | MICRORNA827A ( <i>MIR827A</i> ) <sup>Hypo, Up</sup>                         |
| AT5G20410       | MONOGALACTOSYLDIACYLGLYCEROL SYNTHASE 2 ( <i>MGD2</i> ) <sup>Hypo, Up</sup> |
| AT2G26660       | SPX DOMAIN GENE 2 ( <i>SPX2</i> ) <sup>Hypo, Up</sup>                       |
| AT2G16430       | PURPLE ACID PHOSPHATASE 10 ( <i>PAP10</i> ) <sup>Hyper, Up</sup>            |
| AT4G33030       | SULFOQUINOVOSYLDIACYLGLYCEROL 1 ( <i>SQD1</i> ) <sup>Hypo, Up</sup>         |
| AT3G11670       | DIGALACTOSYL DIACYLGLYCEROL DEFICIENT 1 ( <i>DGD1</i> ) <sup>Hypo, Up</sup> |

<sup>Up</sup> Upregulated    <sup>Down</sup> Downregulated  
<sup>Hypo</sup> Hypo-methylated    <sup>Hyper</sup> Hyper-methylated

**Table S7.** List of P factor differentially methylated DEGs (Pf-methDEGs).

| <u>Locus ID</u> | <u>Gene Description</u>                                                                |
|-----------------|----------------------------------------------------------------------------------------|
| AT2G47020       | Peptide chain release factor 1                                                         |
| AT2G38250       | Homeodomain-like superfamily protein                                                   |
| AT1G68440       | unknown protein                                                                        |
| AT1G74290       | alpha/beta-Hydrolases superfamily protein                                              |
| AT1G74270       | Ribosomal protein L35Ae family protein                                                 |
| AT1G36622       | unknown protein                                                                        |
| AT2G15980       | Tetratricopeptide repeat (TPR)-like superfamily protein                                |
| AT5G41750       | Disease resistance protein (TIR-NBS-LRR class) family                                  |
| AT3G27870       | ATPase E1-E2 type family protein / haloacid dehalogenase-like hydrolase family protein |
| AT1G29560       | Zinc finger C-x8-C-x5-C-x3-H type family protein                                       |
| AT3G23450       | unknown protein                                                                        |
| AT1G12020       | unknown protein                                                                        |
| AT5G26270       | unknown protein                                                                        |
| AT1G58280       | Phosphoglycerate mutase family protein                                                 |
| AT1G12730       | GPI transamidase subunit PIG-U                                                         |
| AT2G18150       | Peroxidase superfamily protein                                                         |
| AT3G55160       | unknown protein                                                                        |
| AT2G18530       | Protein kinase superfamily protein                                                     |
| AT3G47480       | Calcium-binding EF-hand family protein                                                 |
| AT2G15020       | unknown protein                                                                        |
| AT3G46240       | Receptor protein kinase-related protein                                                |
| AT4G21250       | Sulfite exporter TauE/SafE family protein                                              |
| AT2G34100       | unknown protein                                                                        |
| AT1G68400       | leucine-rich repeat transmembrane protein kinase family protein                        |
| AT1G61370       | S-locus lectin protein kinase family protein                                           |
| AT5G28262       | Unknown gene                                                                           |
| AT1G61480       | S-locus lectin protein kinase family protein                                           |
| AT3G51870       | Mitochondrial substrate carrier family protein                                         |
| AT3G28690       | Protein kinase superfamily protein                                                     |
| AT1G19720       | Pentatricopeptide repeat (PPR-like) superfamily protein                                |
| AT2G07676       | unknown protein                                                                        |
| AT5G15360       | unknown protein                                                                        |
| AT5G19740       | Peptidase M28 family protein                                                           |
| AT2G07687       | Cytochrome c oxidase, subunit III                                                      |
| AT1G63540       | hydroxyproline-rich glycoprotein family protein                                        |
| AT3G50370       | unknown protein                                                                        |
| AT5G15780       | Pollen Ole e 1 allergen and extensin family protein                                    |
| AT4G38560       | Arabidopsis phospholipase-like protein (PEARLI 4) family                               |
| AT2G26215       | Transposable element gene                                                              |
| AT3G47110       | Leucine-rich repeat protein kinase family protein                                      |
| AT2G15880       | Leucine-rich repeat (LRR) family protein                                               |
| AT3G18840       | Tetratricopeptide repeat (TPR)-like superfamily protein                                |
| AT2G16230       | O-Glycosyl hydrolases family 17 protein                                                |

AT3G04450 Homeodomain-like superfamily protein  
AT4G14090 Anthocyanidin 5-O-glucosyltransferase, glucosylates the 5-position of the flavonoid A-ring.  
AT3G17190 unknown protein  
AT3G05340 Tetratricopeptide repeat (TPR)-like superfamily protein  
AT2G07675 Ribosomal protein S12/S23 family protein  
AT2G07722 unknown protein  
AT1G03940 HXXXD-type acyl-transferase family protein  
AT5G10340 F-box family protein  
AT5G59070 UDP-Glycosyltransferase superfamily protein  
AT3G01345 Expressed protein  
AT4G17140 pleckstrin homology (PH) domain-containing protein  
AT5G13770 Pentatricopeptide repeat (PPR-like) superfamily protein  
AT5G67385 Phototropic-responsive NPH3 family protein  
AT4G03140 NAD(P)-binding Rossmann-fold superfamily protein  
AT2G05790 O-Glycosyl hydrolases family 17 protein  
AT2G07751 NADH:ubiquinone/plastoquinone oxidoreductase, chain 3 protein  
AT1G67900 Phototropic-responsive NPH3 family protein  
AT5G25930 Protein kinase family protein with leucine-rich repeat domain  
AT5G24155 FAD/NAD(P)-binding oxidoreductase family protein  
AT2G07698 ATPase, F1 complex, alpha subunit protein  
AT4G01350 Cysteine/Histidine-rich C1 domain family protein  
AT5G04960 Plant invertase/pectin methylesterase inhibitor superfamily  
AT4G00500 alpha/beta-Hydrolases superfamily protein  
AT2G07682 gypsy-like retrotransposon family  
AT4G08450 Disease resistance protein (TIR-NBS-LRR class) family  
AT2G07777 ATP synthase 9 mitochondrial  
AT4G39675 unknown protein  
AT1G20390 gypsy-like retrotransposon family  
AT2G07721 unknown protein  
AT1G35625 RING/U-box superfamily protein  
AT1G62310 transcription factor jumonji (jmjC) domain-containing protein  
AT2G07678 unknown protein  
AT1G26380 FAD-binding Berberine family protein  
AT2G16270 unknown protein  
AT2G07671 ATP synthase subunit C family protein  
AT5G27950 P-loop containing nucleoside triphosphate hydrolases superfamily protein  
AT1G49990 F-box family protein  
AT2G04100 MATE efflux family protein  
AT1G64610 Transducin/WD40 repeat-like superfamily protein  
AT1G67870 glycine-rich protein  
AT3G14730 Pentatricopeptide repeat (PPR) superfamily protein  
AT1G61550 S-locus lectin protein kinase family protein  
AT2G36730 Pentatricopeptide repeat (PPR) superfamily protein  
AT2G20560 DNAJ heat shock family protein  
AT3G22142 Encodes a Protease inhibitor/seed storage/LTP family protein  
AT5G07570 glycine/proline-rich protein

AT5G02860 Pentatricopeptide repeat (PPR) superfamily protein  
AT2G04400 Aldolase-type TIM barrel family protein  
AT3G14460 LRR and NB-ARC domains-containing disease resistance protein  
AT1G08310 alpha/beta-Hydrolases superfamily protein  
AT3G09080 Transducin/WD40 repeat-like superfamily protein  
AT1G27180 disease resistance protein (TIR-NBS-LRR class), putative  
AT5G25260 SPFH/Band 7/PHB domain-containing membrane-associated protein family  
AT5G63680 Pyruvate kinase family protein  
AT5G52700 Copper transport protein family  
AT5G45720 AAA-type ATPase family protein  
AT3G54580 Proline-rich extensin-like family protein  
AT2G02720 Pectate lyase family protein  
AT4G22470 protease inhibitor/seed storage/lipid transfer protein (LTP) family protei  
AT5G67340 ARM repeat superfamily protein  
AT2G07673 unknown protein  
AT5G05400 LRR and NB-ARC domains-containing disease resistance protein  
AT3G03790 ankyrin repeat family protein / regulator of chromosome condensation (RCC1) family protein  
AT2G25900 (ATCTH)  
AT4G21390 (B120)  
AT4G17460 (HAT1)  
AT1G32960 (SBT3.3)  
AT1G24706 (THO2)  
AT1G68050 FLAVIN-BINDING, KELCH REPEAT, F BOX 1 (FKF1)  
AT3G05690 NUCLEAR FACTOR Y, SUBUNIT A2 (NF-YA2)  
AT2G13540 ABA HYPERSENSITIVE 1 (ABH1)  
AT2G05710 ACONITASE 3 (ACO3)  
AT3G51970 ACYL-COA STEROL ACYL TRANSFERASE 1 (ASAT1)  
AT1G72330 ALANINE AMINOTRANSFERASE 2 (ALAAT2)  
AT2G14170 ALDEHYDE DEHYDROGENASE 6B2 (ALDH6B2)  
AT3G25610 AMINOPHOSPHOLIPID ATPASE10 (ALA10)  
AT4G04610 APS REDUCTASE 1 (APR1)  
AT4G08870 ARGININE AMIDOHYDROLASE 2 (ARGAH2)  
AT5G40820 ATAXIA TELANGIECTASIA-MUTATED AND RAD3-RELATED (ATR)  
AT4G01820 ATP-BINDING CASSETTE B3 (ABCB3)  
AT2G47000 ATP-BINDING CASSETTE B4 (ABCB4)  
AT3G59140 ATP-BINDING CASSETTE C10 (ABCC10)  
AT1G30410 ATP-BINDING CASSETTE C12 (ABCC12)  
AT2G29940 ATP-BINDING CASSETTE G31 (ABCG31)  
AT2G46530 AUXIN RESPONSE FACTOR 11 (ARF11)  
AT3G57240 BETA-1,3-GLUCANASE 3 (BG3)  
AT2G01950 BRI1-LIKE 2 (BRL2)  
AT3G18290 BRUTUS (BTS)  
AT4G37610 BTB AND TAZ DOMAIN PROTEIN 5 (bt5)  
AT1G06490 CALLOSE SYNTHASE 7 (CalS7)  
AT4G35090 CATALASE 2 (CAT2)  
AT4G23700 CATION/H+ EXCHANGER 17 (CHX17)

AT1G79400 CATION/H<sup>+</sup> EXCHANGER 2 (CHX2)  
AT1G47960 CELL WALL / VACUOLAR INHIBITOR OF FRUCTOSIDASE 1 (C/VIF1)  
AT1G21250 CELL WALL-ASSOCIATED KINASE 1 (WAK1)  
AT4G00450 CENTER CITY (CCT)  
AT5G66520 CHLOROPLAST RNA EDITING FACTOR 7 (CREF7)  
AT3G25690 CHLOROPLAST UNUSUAL POSITIONING 1 (CHUP1)  
AT2G18760 CHROMATIN REMODELING 8 (CHR8)  
AT2G26760 CYCLIN B1;4 (CYCB1;4)  
AT3G21870 CYCLIN P2;1 (CYCP2;1)  
AT4G04490 CYSTEINE-RICH RLK (RECEPTOR-LIKE PROTEIN KINASE) 36 (CRK36)  
AT4G04510 CYSTEINE-RICH RLK (RECEPTOR-LIKE PROTEIN KINASE) 38 (CRK38)  
AT2G39770 CYTOKINESIS DEFECTIVE 1 (CYT1)  
AT1G01040 DICER-LIKE 1 (DCL1)  
AT3G11670 DIGALACTOSYL DIACYLGLYCEROL DEFICIENT 1 (DGD1)  
AT4G10500 DMR6-LIKE OXYGENASE 1 (DLO1)  
AT4G14140 DNA METHYLTRANSFERASE 2 (DMT2)  
AT5G37630 EMBRYO DEFECTIVE 2656 (EMB2656)  
AT4G34200 EMBRYO SAC DEVELOPMENT ARREST 9 (EDA9)  
AT4G13390 EXTENSIN 12 (EXT12)  
AT4G27030 FATTY ACID DESATURASE A (FADA)  
AT4G15200 FORMIN 3 (FH3)  
AT2G24720 GLUTAMATE RECEPTOR 2.2 (GLR2.2)  
AT1G74590 GLUTATHIONE S-TRANSFERASE TAU 10 (GSTU10)  
AT3G09270 GLUTATHIONE S-TRANSFERASE TAU 8 (GSTU8)  
AT3G47420 GLYCEROL-3-PHOSPHATE PERMEASE 1 (G3Pp1)  
AT1G71920 HISTIDINE BIOSYNTHESIS 6B (HISN6B)  
AT4G33770 INOSITOL 1,3,4-TRISPHOSPHATE 5/6 KINASE 2 (ITPK2)  
AT5G13530 KEEP ON GOING (KEG)  
AT3G45330 L-TYPE LECTIN RECEPTOR KINASE I.1 (LECRK-I.1)  
AT1G70130 L-TYPE LECTIN RECEPTOR KINASE V.2 (LECRK-V.2)  
AT3G45140 LIPOXYGENASE 2 (LOX2)  
AT1G17420 LIPOXYGENASE 3 (LOX3)  
AT3G59884 MICRORNA827A (MIR827A)  
AT3G60840 MICROTUBULE-ASSOCIATED PROTEIN 65-4 (MAP65-4)  
AT2G17780 MID1-COMPLEMENTING ACTIVITY 2 (MCA2)  
AT4G08480 MITOGEN-ACTIVATED PROTEIN KINASE KINASE KINASE 9 (MAPKKK9)  
AT5G20410 MONOGALACTOSYLDIACYLGLYCEROL SYNTHASE 2 (MGD2)  
AT5G54280 MYOSIN 2 (ATM2)  
AT4G37670 N-ACETYL-L-GLUTAMATE SYNTHASE 2 (NAGS2)  
AT2G19900 NADP-MALIC ENZYME 1 (NADP-ME1)  
AT4G37590 NAKED PINS IN YUC MUTANTS 5 (NPY5)  
AT4G14760 NETWORKED 1B (NET1B)  
AT4G02710 NETWORKED 1C (NET1C)  
AT2G22560 NETWORKED 2D (NET2D)  
AT4G38340 NIN-LIKE PROTEIN 3 (NLP3)  
AT3G16180 NITRATE TRANSPORTER 1.12 (NRT1.12)



AT1G62580 NITRIC OXIDE-DEPENDENT GUANYLATE CYCLASE 1 (NOGC1)  
AT5G22300 NITRILASE 4 (NIT4)  
AT1G32450 NRT1/ PTR FAMILY 7.3 (NPF7.3)  
AT5G01180 NRT1/ PTR FAMILY 8.2 (NPF8.2)  
AT1G63020 NUCLEAR RNA POLYMERASE D1A (NRPD1A)  
AT3G61990 O-MTASE FAMILY 3 PROTEIN (OMTF3)  
AT1G16370 ORGANIC CATION/CARNITINE TRANSPORTER 6 (OCT6)  
AT1G73220 ORGANIC CATION/CARNITINE TRANSPORTER1 (OCT1)  
AT3G20660 ORGANIC CATION/CARNITINE TRANSPORTER4 (OCT4)  
AT3G09830 PATTERN-TRIGGERED IMMUNITY (PTI) COMPROMISED RECEPTOR-LIKE  
CYTOPLASMIC KINASE 1 (PCRK1)  
AT5G09660 PEROXISOMAL NAD-MALATE DEHYDROGENASE 2 (PMDH2)  
AT5G04230 PHENYL ALANINE AMMONIA-LYASE 3 (PAL3)  
AT2G33770 PHOSPHATE 2 (PHO2)  
AT1G53310 PHOSPHOENOLPYRUVATE CARBOXYLASE 1 (PPC1)  
AT3G26840 PHYTYL ESTER SYNTHASE 2 (PES2)  
AT2G17500 PIN-LIKES 5 (PILS5)  
AT1G74260 PURINE BIOSYNTHESIS 4 (PUR4)  
AT2G16430 PURPLE ACID PHOSPHATASE 10 (PAP10)  
AT1G08590 PXY-LIKE1 (PXL1)  
AT3G53620 PYROPHOSPHORYLASE 4 (PPa4)  
AT4G30710 QWRF DOMAIN CONTAINING 8 (QWRF8)  
AT1G07390 RECEPTOR LIKE PROTEIN 1 (RLP1)  
AT1G67500 RECOVERY PROTEIN 3 (REV3)  
AT1G67710 RESPONSE REGULATOR 11 (ARR11)  
AT1G30510 ROOT FNR 2 (RFNR2)  
AT2G39730 RUBISCO ACTIVASE (RCA)  
AT1G02500 S-ADENOSYLMETHIONINE SYNTHETASE 1 (SAM1)  
AT2G38440 SCAR HOMOLOG 2 (SCAR2)  
AT3G08720 SERINE/THREONINE PROTEIN KINASE 2 (S6K2)  
AT1G62280 SLAC1 HOMOLOGUE 1 (SLAH1)  
AT1G29450 SMALL AUXIN UPREGULATED RNA 64 (SAUR64)  
AT4G11110 SPA1-RELATED 2 (SPA2)  
AT4G16340 SPIKE1 (SPK1)  
AT2G26660 SPX DOMAIN GENE 2 (SPX2)  
AT3G02850 STELAR K+ OUTWARD RECTIFIER (SKOR)  
AT4G08390 STROMAL ASCORBATE PEROXIDASE (SAPX)  
AT1G66570 SUCROSE-PROTON SYMPORTER 7 (SUC7)  
AT4G33030 SULFOQUINOVOSYLDIACYLGLYCEROL 1 (SQD1)  
AT3G14205 SUPPRESSOR OF ACTIN 2 (SAC2)  
AT5G58620 TANDEM ZINC FINGER PROTEIN 9 (TZF9)  
AT1G20840 TONOPLAST MONOSACCHARIDE TRANSPORTER1 (TMT1)  
AT1G55860 UBIQUITIN-PROTEIN LIGASE 1 (UPL1)  
AT1G70320 UBIQUITIN-PROTEIN LIGASE 2 (UPL2)  
AT3G56040 UDP-GLUCOSE PYROPHOSPHORYLASE 3 (UGP3)  
AT2G36750 UDP-GLUCOSYL TRANSFERASE 73C1 (UGT73C1)  
AT1G24100 UDP-GLUCOSYL TRANSFERASE 74B1 (UGT74B1)

AT1G30530 UDP-GLUCOSYL TRANSFERASE 78D1 (UGT78D1)  
AT4G15540 USUALLY MULTIPLE ACIDS MOVE IN AND OUT TRANSPORTERS 38 (UMAMIT38)  
AT4G07400 VIER F-BOX PROTEINE 3 (VFB3)  
AT1G21240 WALL ASSOCIATED KINASE 3 (WAK3)  
AT1G21230 WALL ASSOCIATED KINASE 5 (WAK5)  
AT1G80840 WRKY DNA-BINDING PROTEIN 40 (WRKY40)  
AT1G65730 YELLOW STRIPE LIKE 7 (YSL7)  
AT5G13740 ZINC INDUCED FACILITATOR 1 (ZIF1)

**Table S8.** Global statistics for DMRs in all phosphate treatments for each chromosome.

| <b>Treatment</b>         | <b>Total DmCs</b> | <b>Total DMRs</b> | <b>DmCs in DMRs</b> | <b>% of Orphan DmCs</b> | <b>Average DmCs in DMR</b> | <b>Min. DMR lenght</b> | <b>Max. DMR lenght</b> | <b>Total lenght DMRs</b> | <b>Average DMR lenght</b> |
|--------------------------|-------------------|-------------------|---------------------|-------------------------|----------------------------|------------------------|------------------------|--------------------------|---------------------------|
| <b>-Pit Shoot 7 dat</b>  |                   |                   |                     |                         |                            |                        |                        |                          |                           |
| Chr1                     | 5035              | 316               | 2565                | 49                      | 8                          | 4                      | 12016                  | 677156                   | 2143                      |
| Chr2                     | 9454              | 382               | 7275                | 23                      | 19                         | 27                     | 120607                 | 897704                   | 2350                      |
| Chr3                     | 6034              | 399               | 3416                | 43                      | 9                          | 19                     | 11081                  | 785636                   | 1969                      |
| Chr4                     | 4879              | 360               | 2786                | 43                      | 8                          | 31                     | 9049                   | 682089                   | 1895                      |
| Chr5                     | 5393              | 369               | 3034                | 44                      | 8                          | 21                     | 12062                  | 795618                   | 2156                      |
| <b>-Pit Root 7 dat</b>   |                   |                   |                     |                         |                            |                        |                        |                          |                           |
| Chr1                     | 4392              | 283               | 2012                | 54                      | 7                          | 43                     | 11998                  | 546110                   | 1930                      |
| Chr2                     | 6010              | 357               | 3784                | 37                      | 11                         | 21                     | 41255                  | 797689                   | 2234                      |
| Chr3                     | 5313              | 396               | 2900                | 45                      | 7                          | 47                     | 11820                  | 766423                   | 1935                      |
| Chr4                     | 4350              | 346               | 2420                | 44                      | 7                          | 68                     | 7340                   | 692735                   | 2002                      |
| Chr5                     | 4978              | 351               | 2598                | 48                      | 7                          | 33                     | 12036                  | 703869                   | 2005                      |
| <b>-Pit Shoot 16 dat</b> |                   |                   |                     |                         |                            |                        |                        |                          |                           |
| Chr1                     | 6633              | 432               | 3789                | 43                      | 9                          | 9                      | 13070                  | 906415                   | 2098                      |
| Chr2                     | 15222             | 489               | 12781               | 16                      | 26                         | 32                     | 120794                 | 1193179                  | 2440                      |
| Chr3                     | 8199              | 564               | 5498                | 33                      | 10                         | 17                     | 13730                  | 1200930                  | 2129                      |
| Chr4                     | 6371              | 469               | 4303                | 32                      | 9                          | 13                     | 14357                  | 1057663                  | 2255                      |
| Chr5                     | 7435              | 502               | 4755                | 36                      | 9                          | 12                     | 16698                  | 1112910                  | 2217                      |
| <b>-Pit Root 16 dat</b>  |                   |                   |                     |                         |                            |                        |                        |                          |                           |
| Chr1                     | 6559              | 429               | 3702                | 44                      | 9                          | 12                     | 16716                  | 902107                   | 2103                      |
| Chr2                     | 9840              | 504               | 7348                | 25                      | 15                         | 28                     | 55297                  | 1139108                  | 2260                      |
| Chr3                     | 8101              | 542               | 5343                | 34                      | 10                         | 10                     | 9451                   | 1123677                  | 2073                      |
| Chr4                     | 6366              | 447               | 4202                | 34                      | 9                          | 37                     | 12215                  | 1006861                  | 2252                      |
| Chr5                     | 7436              | 469               | 4611                | 38                      | 10                         | 16                     | 12126                  | 1038047                  | 2213                      |

**Table S9.** List of DMRs identified in this study. DMRs are separated by methylation direction (Hyper-DMRs, Hypo-DMRs) and phosphate contrast.

| <b>-Pit Shoot 7dat (Hyper-DMRs)</b> |              |            |                       |                   |                |
|-------------------------------------|--------------|------------|-----------------------|-------------------|----------------|
| <b>Chromosome</b>                   | <b>Start</b> | <b>End</b> | <b>number of DMCs</b> | <b>DMR lenght</b> | <b>P-value</b> |
| Chr1                                | 1445307      | 1446088    | 4                     | 782               | 8.76E-07       |
| Chr1                                | 4333883      | 4334405    | 4                     | 523               | 2.18E-07       |
| Chr1                                | 5692819      | 5695942    | 8                     | 3124              | 7.27E-12       |
| Chr1                                | 7353082      | 7365097    | 67                    | 12016             | 3.49E-59       |
| Chr1                                | 7430057      | 7431111    | 5                     | 1055              | 1.35103E-05    |
| Chr1                                | 8453534      | 8457498    | 12                    | 3965              | 6.12E-16       |
| Chr1                                | 8729357      | 8731382    | 7                     | 2026              | 7.82E-10       |
| Chr1                                | 9304834      | 9305582    | 5                     | 749               | 1.29788E-06    |
| Chr1                                | 9371813      | 9373167    | 6                     | 1355              | 1.37E-10       |
| Chr1                                | 9575338      | 9576849    | 5                     | 1512              | 1.96038E-06    |
| Chr1                                | 10358486     | 10360322   | 9                     | 1837              | 1.35E-13       |
| Chr1                                | 10699884     | 10701325   | 5                     | 1442              | 6.09E-07       |
| Chr1                                | 11306271     | 11309658   | 8                     | 3388              | 5.79E-07       |
| Chr1                                | 11834700     | 11836671   | 6                     | 1972              | 2.29E-09       |
| Chr1                                | 11896003     | 11897129   | 5                     | 1127              | 8.58E-10       |
| Chr1                                | 11957967     | 11958015   | 5                     | 49                | 1.54E-09       |
| Chr1                                | 12406357     | 12411126   | 12                    | 4770              | 1.45E-13       |
| Chr1                                | 12670322     | 12671594   | 5                     | 1273              | 1.31E-08       |
| Chr1                                | 12679126     | 12680579   | 5                     | 1454              | 2.37892E-06    |
| Chr1                                | 12681691     | 12684590   | 10                    | 2900              | 7.48E-16       |
| Chr1                                | 12822344     | 12823143   | 5                     | 800               | 9.26E-07       |
| Chr1                                | 12998945     | 13001231   | 6                     | 2287              | 7.46E-08       |
| Chr1                                | 13002709     | 13004176   | 5                     | 1468              | 2.17E-09       |
| Chr1                                | 13020144     | 13022138   | 4                     | 1995              | 6.79036E-06    |
| Chr1                                | 13101704     | 13102219   | 5                     | 516               | 4.81E-08       |
| Chr1                                | 13127010     | 13127535   | 4                     | 526               | 3.15687E-06    |
| Chr1                                | 13295625     | 13296371   | 4                     | 747               | 1.87E-07       |
| Chr1                                | 13326679     | 13327757   | 6                     | 1079              | 1.73513E-06    |
| Chr1                                | 13399389     | 13400182   | 5                     | 794               | 5.18194E-06    |
| Chr1                                | 13491560     | 13492253   | 4                     | 694               | 3.74716E-05    |
| Chr1                                | 13517848     | 13519668   | 6                     | 1821              | 2.28E-11       |
| Chr1                                | 13560480     | 13562545   | 9                     | 2066              | 2.12E-13       |
| Chr1                                | 13575088     | 13575855   | 4                     | 768               | 1.79941E-06    |
| Chr1                                | 13625112     | 13627712   | 7                     | 2601              | 7.53534E-06    |
| Chr1                                | 13647905     | 13652024   | 12                    | 4120              | 3.80E-15       |
| Chr1                                | 13678792     | 13680494   | 4                     | 1703              | 6.70305E-06    |
| Chr1                                | 13694115     | 13694986   | 5                     | 872               | 1.34E-09       |
| Chr1                                | 13768779     | 13771263   | 7                     | 2485              | 1.19578E-06    |
| Chr1                                | 13772972     | 13776119   | 11                    | 3148              | 1.52E-14       |
| Chr1                                | 13779089     | 13781173   | 8                     | 2085              | 2.51E-09       |
| Chr1                                | 13784335     | 13785251   | 4                     | 917               | 6.08496E-06    |
| Chr1                                | 13794675     | 13796207   | 4                     | 1533              | 3.94727E-05    |
| Chr1                                | 13798950     | 13801634   | 11                    | 2685              | 8.88E-14       |
| Chr1                                | 13820653     | 13821426   | 4                     | 774               | 2.15937E-06    |
| Chr1                                | 13825397     | 13827470   | 5                     | 2074              | 2.19E-07       |
| Chr1                                | 13828823     | 13829978   | 7                     | 1156              | 4.42E-10       |
| Chr1                                | 13888716     | 13890817   | 8                     | 2102              | 7.39E-09       |
| Chr1                                | 13945306     | 13947688   | 7                     | 2383              | 1.20E-09       |
| Chr1                                | 13956709     | 13959114   | 7                     | 2406              | 2.11E-08       |
| Chr1                                | 14061975     | 14063193   | 5                     | 1219              | 6.80174E-05    |
| Chr1                                | 14078061     | 14079118   | 5                     | 1058              | 2.10E-10       |
| Chr1                                | 14085677     | 14087356   | 4                     | 1680              | 5.25148E-06    |
| Chr1                                | 14089011     | 14090199   | 7                     | 1189              | 3.30E-11       |
| Chr1                                | 14109634     | 14113484   | 10                    | 3851              | 2.82E-13       |
| Chr1                                | 14119445     | 14124397   | 13                    | 4953              | 8.28E-11       |
| Chr1                                | 14125700     | 14127241   | 4                     | 1542              | 3.91234E-05    |
| Chr1                                | 14178284     | 14180047   | 4                     | 1764              | 7.10678E-05    |

|      |          |          |    |      |             |
|------|----------|----------|----|------|-------------|
| Chr1 | 14198860 | 14200667 | 6  | 1808 | 4.40208E-06 |
| Chr1 | 14221585 | 14223996 | 10 | 2412 | 8.86E-15    |
| Chr1 | 14229582 | 14231246 | 9  | 1665 | 5.57E-11    |
| Chr1 | 14234747 | 14237562 | 7  | 2816 | 1.45E-10    |
| Chr1 | 14246524 | 14249946 | 9  | 3423 | 3.32E-11    |
| Chr1 | 14251114 | 14252210 | 6  | 1097 | 2.19048E-06 |
| Chr1 | 14253754 | 14256188 | 10 | 2435 | 4.06E-12    |
| Chr1 | 14258042 | 14258686 | 4  | 645  | 2.59E-08    |
| Chr1 | 14259756 | 14260708 | 4  | 953  | 1.83346E-05 |
| Chr1 | 14269329 | 14272443 | 10 | 3115 | 7.52E-12    |
| Chr1 | 14275455 | 14276239 | 5  | 785  | 1.73497E-06 |
| Chr1 | 14281386 | 14282717 | 4  | 1332 | 1.77585E-06 |
| Chr1 | 14327213 | 14329580 | 8  | 2368 | 1.12E-09    |
| Chr1 | 14338381 | 14340183 | 4  | 1803 | 8.49126E-06 |
| Chr1 | 14442847 | 14448348 | 13 | 5502 | 5.61E-17    |
| Chr1 | 14450874 | 14452438 | 8  | 1565 | 1.70E-08    |
| Chr1 | 14471075 | 14471283 | 4  | 209  | 6.25E-07    |
| Chr1 | 14482610 | 14483703 | 4  | 1094 | 2.51875E-05 |
| Chr1 | 14492371 | 14494602 | 5  | 2232 | 2.21866E-06 |
| Chr1 | 14503043 | 14504505 | 4  | 1463 | 1.2005E-05  |
| Chr1 | 14509595 | 14510547 | 6  | 953  | 4.45E-07    |
| Chr1 | 14539692 | 14540565 | 4  | 874  | 3.93E-07    |
| Chr1 | 14585692 | 14587929 | 6  | 2238 | 3.66E-10    |
| Chr1 | 14589568 | 14594186 | 9  | 4619 | 2.85E-09    |
| Chr1 | 14598926 | 14599958 | 6  | 1033 | 2.58E-13    |
| Chr1 | 14715193 | 14717457 | 5  | 2265 | 2.11076E-06 |
| Chr1 | 14895771 | 14897040 | 5  | 1270 | 8.74172E-05 |
| Chr1 | 15053565 | 15055492 | 5  | 1928 | 4.77E-09    |
| Chr1 | 15079479 | 15080215 | 5  | 737  | 5.84E-09    |
| Chr1 | 15081239 | 15085774 | 63 | 4536 | 1.31E-45    |
| Chr1 | 15137264 | 15138823 | 4  | 1560 | 7.68E-08    |
| Chr1 | 15152092 | 15154614 | 6  | 2523 | 2.63E-08    |
| Chr1 | 15161683 | 15162819 | 4  | 1137 | 1.74234E-06 |
| Chr1 | 15185050 | 15186089 | 6  | 1040 | 6.40E-08    |
| Chr1 | 15187802 | 15189499 | 5  | 1698 | 5.79E-07    |
| Chr1 | 15421685 | 15423304 | 6  | 1620 | 2.44E-08    |
| Chr1 | 15437418 | 15438790 | 7  | 1373 | 5.92E-11    |
| Chr1 | 15445538 | 15448696 | 9  | 3159 | 2.77E-12    |
| Chr1 | 15451068 | 15451658 | 4  | 591  | 1.17E-07    |
| Chr1 | 15489276 | 15491658 | 8  | 2383 | 1.45E-09    |
| Chr1 | 15500426 | 15500758 | 4  | 333  | 5.91424E-06 |
| Chr1 | 15505075 | 15507229 | 7  | 2155 | 1.85E-10    |
| Chr1 | 15513217 | 15513389 | 4  | 173  | 6.11358E-06 |
| Chr1 | 15535001 | 15537074 | 6  | 2074 | 1.69E-07    |
| Chr1 | 15539278 | 15540667 | 7  | 1390 | 3.39E-09    |
| Chr1 | 15542339 | 15544613 | 13 | 2275 | 3.02E-16    |
| Chr1 | 15546629 | 15549744 | 8  | 3116 | 8.92E-13    |
| Chr1 | 15554351 | 15557384 | 9  | 3034 | 4.64E-10    |
| Chr1 | 15558685 | 15561479 | 6  | 2795 | 5.06E-07    |
| Chr1 | 15564568 | 15571358 | 18 | 6791 | 1.40E-20    |
| Chr1 | 15575189 | 15577762 | 6  | 2574 | 3.02E-07    |
| Chr1 | 15611506 | 15613800 | 4  | 2295 | 0.000604706 |
| Chr1 | 15617030 | 15618951 | 5  | 1922 | 4.27225E-06 |
| Chr1 | 15670308 | 15671638 | 4  | 1331 | 9.38E-08    |
| Chr1 | 15681400 | 15683139 | 4  | 1740 | 7.40107E-05 |
| Chr1 | 15700271 | 15702382 | 9  | 2112 | 1.74E-11    |
| Chr1 | 15707524 | 15712728 | 12 | 5205 | 6.39E-13    |
| Chr1 | 15752401 | 15752922 | 4  | 522  | 1.75938E-06 |
| Chr1 | 15784039 | 15786305 | 6  | 2267 | 2.98E-09    |
| Chr1 | 15790286 | 15791687 | 7  | 1402 | 6.59E-10    |
| Chr1 | 15800805 | 15801852 | 4  | 1048 | 6.51E-07    |
| Chr1 | 15878223 | 15879167 | 4  | 945  | 1.90926E-06 |
| Chr1 | 15951261 | 15951688 | 5  | 428  | 7.1306E-05  |

|      |          |          |     |      |             |
|------|----------|----------|-----|------|-------------|
| Chr1 | 16027189 | 16028743 | 4   | 1555 | 3.2345E-06  |
| Chr1 | 16097625 | 16098417 | 6   | 793  | 4.06E-08    |
| Chr1 | 16101338 | 16103270 | 8   | 1933 | 1.23E-11    |
| Chr1 | 16112513 | 16113252 | 4   | 740  | 5.2332E-06  |
| Chr1 | 16114656 | 16114659 | 4   | 4    | 6.34E-07    |
| Chr1 | 16119211 | 16122455 | 8   | 3245 | 6.36E-10    |
| Chr1 | 16198752 | 16199982 | 6   | 1231 | 4.83E-13    |
| Chr1 | 16281942 | 16284313 | 5   | 2372 | 3.14E-09    |
| Chr1 | 16313036 | 16314338 | 5   | 1303 | 1.99E-08    |
| Chr1 | 16377273 | 16379267 | 6   | 1995 | 4.88E-10    |
| Chr1 | 16384023 | 16385008 | 6   | 986  | 8.71E-10    |
| Chr1 | 16391079 | 16392464 | 4   | 1386 | 1.07474E-05 |
| Chr1 | 16510079 | 16518764 | 35  | 8686 | 2.52E-40    |
| Chr1 | 16521008 | 16524632 | 21  | 3625 | 1.87E-20    |
| Chr1 | 16526666 | 16528030 | 5   | 1365 | 7.1845E-06  |
| Chr1 | 16570445 | 16574090 | 10  | 3646 | 1.76E-12    |
| Chr1 | 16588179 | 16588667 | 6   | 489  | 1.59E-08    |
| Chr1 | 16626958 | 16633386 | 13  | 6429 | 1.77E-20    |
| Chr1 | 16635181 | 16637285 | 6   | 2105 | 4.10E-09    |
| Chr1 | 16645875 | 16645928 | 8   | 54   | 5.42E-11    |
| Chr1 | 16676000 | 16678574 | 6   | 2575 | 2.78E-07    |
| Chr1 | 16692450 | 16694048 | 5   | 1599 | 8.06427E-06 |
| Chr1 | 16697377 | 16698518 | 4   | 1142 | 3.05286E-06 |
| Chr1 | 16742958 | 16745151 | 4   | 2194 | 3.31E-08    |
| Chr1 | 17027071 | 17028370 | 5   | 1300 | 1.34E-08    |
| Chr1 | 17029413 | 17030005 | 5   | 593  | 2.40E-07    |
| Chr1 | 17037213 | 17039065 | 5   | 1853 | 2.13E-07    |
| Chr1 | 17046979 | 17049133 | 10  | 2155 | 8.71E-14    |
| Chr1 | 17257178 | 17258795 | 4   | 1618 | 1.27849E-05 |
| Chr1 | 17260124 | 17261946 | 5   | 1823 | 9.16E-07    |
| Chr1 | 17522885 | 17524605 | 4   | 1721 | 3.27926E-05 |
| Chr1 | 17534902 | 17535715 | 5   | 814  | 6.87E-08    |
| Chr1 | 17677525 | 17680457 | 7   | 2933 | 1.43E-07    |
| Chr1 | 17689724 | 17690567 | 7   | 844  | 3.69E-10    |
| Chr1 | 18013919 | 18015226 | 4   | 1308 | 3.21678E-06 |
| Chr1 | 18192350 | 18192447 | 4   | 98   | 1.15936E-05 |
| Chr1 | 18380378 | 18381062 | 4   | 685  | 4.83316E-05 |
| Chr1 | 18969656 | 18970977 | 5   | 1322 | 1.63766E-05 |
| Chr1 | 19388261 | 19388355 | 4   | 95   | 4.19E-08    |
| Chr1 | 19732842 | 19733758 | 4   | 917  | 1.6701E-06  |
| Chr1 | 20320078 | 20320362 | 6   | 285  | 4.63E-08    |
| Chr1 | 21454629 | 21456571 | 5   | 1943 | 4.57E-07    |
| Chr1 | 21526210 | 21526857 | 4   | 648  | 1.78376E-06 |
| Chr1 | 21746248 | 21748782 | 7   | 2535 | 2.65E-08    |
| Chr1 | 23567602 | 23568891 | 4   | 1290 | 6.30955E-05 |
| Chr1 | 23926856 | 23928665 | 8   | 1810 | 4.02E-10    |
| Chr1 | 24273022 | 24276391 | 85  | 3370 | 2.75E-122   |
| Chr1 | 25660100 | 25660462 | 4   | 363  | 3.76138E-06 |
| Chr1 | 26369339 | 26371085 | 7   | 1747 | 1.86E-09    |
| Chr1 | 26712307 | 26712322 | 4   | 16   | 6.77E-08    |
| Chr2 | 1111     | 3715     | 141 | 2605 | 1.49E-157   |
| Chr2 | 5389     | 5969     | 42  | 581  | 9.36E-84    |
| Chr2 | 9912     | 12274    | 39  | 2363 | 3.96E-58    |
| Chr2 | 247644   | 248902   | 4   | 1259 | 4.52E-10    |
| Chr2 | 373138   | 373918   | 4   | 781  | 2.15494E-06 |
| Chr2 | 1435108  | 1435312  | 4   | 205  | 0.000134855 |
| Chr2 | 1507021  | 1510588  | 8   | 3568 | 6.87E-11    |
| Chr2 | 1548922  | 1549851  | 6   | 930  | 5.40E-15    |
| Chr2 | 1784161  | 1787020  | 9   | 2860 | 6.06E-11    |
| Chr2 | 1830676  | 1832707  | 6   | 2032 | 1.02E-11    |
| Chr2 | 1996272  | 1997415  | 4   | 1144 | 8.82E-08    |
| Chr2 | 2036754  | 2037707  | 6   | 954  | 4.62E-09    |
| Chr2 | 2378132  | 2381186  | 7   | 3055 | 1.35E-08    |

|      |         |         |      |        |             |
|------|---------|---------|------|--------|-------------|
| Chr2 | 2401274 | 2401820 | 8    | 547    | 4.74E-10    |
| Chr2 | 2438323 | 2439357 | 5    | 1035   | 2.16453E-06 |
| Chr2 | 2448017 | 2451423 | 10   | 3407   | 3.03E-12    |
| Chr2 | 2463972 | 2467024 | 9    | 3053   | 6.87E-15    |
| Chr2 | 2490313 | 2491327 | 5    | 1015   | 3.24792E-05 |
| Chr2 | 2492952 | 2493682 | 4    | 731    | 1.9357E-05  |
| Chr2 | 2499896 | 2500528 | 4    | 633    | 1.08E-07    |
| Chr2 | 2504989 | 2506996 | 7    | 2008   | 2.74E-11    |
| Chr2 | 2510836 | 2512807 | 4    | 1972   | 1.84429E-06 |
| Chr2 | 2591920 | 2592613 | 5    | 694    | 6.30E-08    |
| Chr2 | 2724641 | 2727039 | 7    | 2399   | 5.61E-10    |
| Chr2 | 2776269 | 2777956 | 5    | 1688   | 2.23E-08    |
| Chr2 | 2830204 | 2831068 | 4    | 865    | 4.42466E-05 |
| Chr2 | 2844846 | 2845415 | 4    | 570    | 1.01832E-06 |
| Chr2 | 3077195 | 3078791 | 5    | 1597   | 3.09E-09    |
| Chr2 | 3084519 | 3086759 | 4    | 2241   | 9.91E-07    |
| Chr2 | 3088433 | 3089004 | 4    | 572    | 1.45184E-05 |
| Chr2 | 3103109 | 3104364 | 5    | 1256   | 9.91E-09    |
| Chr2 | 3163072 | 3164332 | 5    | 1261   | 7.29E-09    |
| Chr2 | 3226693 | 3228456 | 5    | 1764   | 1.93536E-06 |
| Chr2 | 3240802 | 3242201 | 22   | 1400   | 1.11E-24    |
| Chr2 | 3247282 | 3258599 | 400  | 11318  | 0           |
| Chr2 | 3259768 | 3367888 | 3153 | 108121 | 0           |
| Chr2 | 3375058 | 3379192 | 74   | 4135   | 2.53E-95    |
| Chr2 | 3381751 | 3382080 | 8    | 330    | 1.42E-09    |
| Chr2 | 3392907 | 3395318 | 41   | 2412   | 4.52E-62    |
| Chr2 | 3396335 | 3397388 | 49   | 1054   | 1.21E-84    |
| Chr2 | 3398713 | 3400886 | 15   | 2174   | 7.58E-22    |
| Chr2 | 3404815 | 3406660 | 12   | 1846   | 1.38E-16    |
| Chr2 | 3412683 | 3412972 | 11   | 290    | 1.41E-17    |
| Chr2 | 3418666 | 3418799 | 11   | 134    | 3.04E-14    |
| Chr2 | 3428957 | 3429853 | 6    | 897    | 3.47E-08    |
| Chr2 | 3431505 | 3431627 | 5    | 123    | 3.36E-07    |
| Chr2 | 3434038 | 3434495 | 10   | 458    | 8.42E-16    |
| Chr2 | 3438177 | 3438891 | 21   | 715    | 8.35E-28    |
| Chr2 | 3442815 | 3442977 | 4    | 163    | 1.09238E-05 |
| Chr2 | 3459027 | 3461940 | 35   | 2914   | 2.02E-47    |
| Chr2 | 3463389 | 3465432 | 10   | 2044   | 3.93E-12    |
| Chr2 | 3468287 | 3468594 | 11   | 308    | 1.08E-11    |
| Chr2 | 3474764 | 3476303 | 13   | 1540   | 3.20E-16    |
| Chr2 | 3478472 | 3478500 | 5    | 29     | 4.13E-08    |
| Chr2 | 3482618 | 3482640 | 4    | 23     | 4.61E-08    |
| Chr2 | 3483951 | 3485008 | 4    | 1058   | 5.1772E-06  |
| Chr2 | 3486063 | 3493596 | 171  | 7534   | 9.27E-245   |
| Chr2 | 3496915 | 3502005 | 51   | 5091   | 1.13E-79    |
| Chr2 | 3509149 | 3510674 | 33   | 1526   | 1.16E-37    |
| Chr2 | 3521440 | 3522204 | 4    | 765    | 4.05074E-06 |
| Chr2 | 3536658 | 3538231 | 6    | 1574   | 1.39E-08    |
| Chr2 | 3542361 | 3543175 | 4    | 815    | 2.74E-07    |
| Chr2 | 3548189 | 3549789 | 7    | 1601   | 3.18E-08    |
| Chr2 | 3555038 | 3555985 | 6    | 948    | 8.02E-09    |
| Chr2 | 3566238 | 3569306 | 6    | 3069   | 0.000216461 |
| Chr2 | 3605702 | 3607567 | 55   | 1866   | 5.97E-42    |
| Chr2 | 3614967 | 3628073 | 285  | 13107  | 8.70E-193   |
| Chr2 | 3663077 | 3664163 | 4    | 1087   | 7.37467E-05 |
| Chr2 | 3724763 | 3725895 | 5    | 1133   | 5.35126E-06 |
| Chr2 | 3732328 | 3735155 | 6    | 2828   | 1.73E-07    |
| Chr2 | 3742418 | 3743514 | 6    | 1097   | 1.22E-09    |
| Chr2 | 3764842 | 3766037 | 4    | 1196   | 2.41991E-05 |
| Chr2 | 3786560 | 3787481 | 6    | 922    | 7.27E-08    |
| Chr2 | 3825978 | 3827644 | 5    | 1667   | 5.95096E-06 |
| Chr2 | 3840073 | 3841170 | 5    | 1098   | 7.65E-07    |
| Chr2 | 3858051 | 3859893 | 5    | 1843   | 1.17E-07    |

|      |         |         |    |      |             |
|------|---------|---------|----|------|-------------|
| Chr2 | 3861540 | 3863223 | 5  | 1684 | 7.69E-07    |
| Chr2 | 3880221 | 3881990 | 6  | 1770 | 4.28E-08    |
| Chr2 | 3885361 | 3889623 | 10 | 4263 | 2.28E-12    |
| Chr2 | 3891340 | 3893275 | 7  | 1936 | 9.61E-09    |
| Chr2 | 3914772 | 3916181 | 4  | 1410 | 2.20545E-06 |
| Chr2 | 3923424 | 3924167 | 4  | 744  | 1.24901E-05 |
| Chr2 | 3948531 | 3949199 | 4  | 669  | 1.96E-07    |
| Chr2 | 3950778 | 3953751 | 9  | 2974 | 5.47E-10    |
| Chr2 | 3971190 | 3975357 | 11 | 4168 | 2.75E-16    |
| Chr2 | 4009172 | 4009831 | 5  | 660  | 6.55E-07    |
| Chr2 | 4011374 | 4012154 | 4  | 781  | 5.93381E-05 |
| Chr2 | 4051408 | 4053390 | 4  | 1983 | 3.25236E-05 |
| Chr2 | 4095034 | 4096261 | 5  | 1228 | 1.13442E-06 |
| Chr2 | 4121668 | 4123597 | 4  | 1930 | 6.84E-07    |
| Chr2 | 4130175 | 4131831 | 5  | 1657 | 0.000289925 |
| Chr2 | 4166618 | 4168815 | 7  | 2198 | 1.39E-07    |
| Chr2 | 4182474 | 4185280 | 8  | 2807 | 1.60E-10    |
| Chr2 | 4188345 | 4193291 | 13 | 4947 | 2.06E-17    |
| Chr2 | 4212882 | 4214337 | 4  | 1456 | 9.19E-07    |
| Chr2 | 4241732 | 4241991 | 5  | 260  | 3.52503E-07 |
| Chr2 | 4258683 | 4260678 | 5  | 1996 | 2.02E-07    |
| Chr2 | 4276556 | 4277445 | 4  | 890  | 8.67E-07    |
| Chr2 | 4289935 | 4291499 | 4  | 1565 | 1.16E-07    |
| Chr2 | 4311381 | 4311935 | 7  | 555  | 3.70E-09    |
| Chr2 | 4388886 | 4390835 | 5  | 1950 | 1.72487E-05 |
| Chr2 | 4391931 | 4393466 | 6  | 1536 | 5.18211E-06 |
| Chr2 | 4395726 | 4401642 | 16 | 5917 | 1.51E-24    |
| Chr2 | 4463726 | 4464296 | 4  | 571  | 6.15E-08    |
| Chr2 | 4490933 | 4492185 | 5  | 1253 | 8.84941E-07 |
| Chr2 | 4517501 | 4520240 | 6  | 2740 | 1.97E-07    |
| Chr2 | 4533048 | 4534178 | 5  | 1131 | 4.9114E-05  |
| Chr2 | 4578153 | 4580779 | 5  | 2627 | 5.23E-07    |
| Chr2 | 4596923 | 4599545 | 6  | 2623 | 5.18E-09    |
| Chr2 | 4606993 | 4607304 | 4  | 312  | 9.41E-07    |
| Chr2 | 4674902 | 4678217 | 6  | 3316 | 1.35992E-05 |
| Chr2 | 4695731 | 4698180 | 7  | 2450 | 2.39E-09    |
| Chr2 | 4705203 | 4707100 | 8  | 1898 | 1.33E-13    |
| Chr2 | 4710804 | 4714196 | 13 | 3393 | 2.76E-15    |
| Chr2 | 4718005 | 4720849 | 8  | 2845 | 6.32E-13    |
| Chr2 | 4731152 | 4733137 | 8  | 1986 | 8.78E-13    |
| Chr2 | 4734505 | 4736675 | 8  | 2171 | 7.50E-09    |
| Chr2 | 4779386 | 4782015 | 6  | 2630 | 2.83E-08    |
| Chr2 | 4815635 | 4817080 | 4  | 1446 | 3.49144E-06 |
| Chr2 | 4907285 | 4908850 | 7  | 1566 | 2.18E-10    |
| Chr2 | 4975598 | 4980298 | 13 | 4701 | 1.26E-16    |
| Chr2 | 4988571 | 4989584 | 4  | 1014 | 3.01766E-05 |
| Chr2 | 4994029 | 4996404 | 6  | 2376 | 2.80E-08    |
| Chr2 | 5036483 | 5036656 | 4  | 174  | 2.24058E-05 |
| Chr2 | 5046219 | 5046398 | 4  | 180  | 1.01E-07    |
| Chr2 | 5052356 | 5052468 | 4  | 113  | 1.50E-09    |
| Chr2 | 5087914 | 5088974 | 4  | 1061 | 1.10E-07    |
| Chr2 | 5093613 | 5095024 | 6  | 1412 | 1.40E-07    |
| Chr2 | 5100686 | 5104626 | 11 | 3941 | 4.03E-11    |
| Chr2 | 5128989 | 5129640 | 4  | 652  | 6.51211E-06 |
| Chr2 | 5254101 | 5256880 | 9  | 2780 | 2.84E-11    |
| Chr2 | 5299300 | 5302095 | 6  | 2796 | 3.42E-08    |
| Chr2 | 5309632 | 5311218 | 4  | 1587 | 6.89444E-06 |
| Chr2 | 5328647 | 5330113 | 4  | 1467 | 6.01E-08    |
| Chr2 | 5332522 | 5336127 | 10 | 3606 | 5.24E-11    |
| Chr2 | 5359501 | 5359753 | 4  | 253  | 6.1092E-05  |
| Chr2 | 5360903 | 5362012 | 4  | 1110 | 2.16E-09    |
| Chr2 | 5374857 | 5376783 | 4  | 1927 | 6.86E-07    |
| Chr2 | 5379895 | 5381972 | 5  | 2078 | 6.61E-09    |



|      |          |          |    |      |             |
|------|----------|----------|----|------|-------------|
| Chr2 | 5475157  | 5477997  | 7  | 2841 | 7.12E-09    |
| Chr2 | 5494984  | 5497811  | 8  | 2828 | 1.44E-10    |
| Chr2 | 5518435  | 5520288  | 5  | 1854 | 6.90E-08    |
| Chr2 | 5571945  | 5575451  | 9  | 3507 | 8.21E-11    |
| Chr2 | 5576931  | 5578545  | 5  | 1615 | 7.2084E-06  |
| Chr2 | 5600886  | 5602081  | 7  | 1196 | 5.94E-10    |
| Chr2 | 5603531  | 5605850  | 6  | 2320 | 7.99E-08    |
| Chr2 | 5621965  | 5625203  | 7  | 3239 | 2.45E-10    |
| Chr2 | 5628368  | 5630346  | 5  | 1979 | 3.60588E-05 |
| Chr2 | 5780819  | 5782101  | 6  | 1283 | 2.17E-07    |
| Chr2 | 5783475  | 5784959  | 4  | 1485 | 3.0984E-06  |
| Chr2 | 5808320  | 5809188  | 4  | 869  | 1.08347E-05 |
| Chr2 | 5887087  | 5888556  | 4  | 1470 | 0.000333543 |
| Chr2 | 5900931  | 5904112  | 13 | 3182 | 3.10E-14    |
| Chr2 | 5985841  | 5988646  | 6  | 2806 | 3.31E-09    |
| Chr2 | 5991322  | 5992726  | 4  | 1405 | 1.6011E-05  |
| Chr2 | 6127024  | 6127531  | 4  | 508  | 1.53678E-05 |
| Chr2 | 6267966  | 6268883  | 5  | 918  | 2.24593E-06 |
| Chr2 | 6344028  | 6344373  | 4  | 346  | 1.72263E-05 |
| Chr2 | 6424873  | 6426259  | 4  | 1387 | 2.6776E-06  |
| Chr2 | 6434077  | 6434512  | 4  | 436  | 1.67627E-06 |
| Chr2 | 6461768  | 6463343  | 4  | 1576 | 6.82673E-06 |
| Chr2 | 6526003  | 6528078  | 8  | 2076 | 3.47E-10    |
| Chr2 | 6623513  | 6626133  | 5  | 2621 | 4.62E-07    |
| Chr2 | 6701109  | 6702578  | 4  | 1470 | 8.88E-07    |
| Chr2 | 6718679  | 6719951  | 4  | 1273 | 3.12676E-06 |
| Chr2 | 6720965  | 6722144  | 4  | 1180 | 5.25275E-06 |
| Chr2 | 6724641  | 6725732  | 5  | 1092 | 9.4824E-06  |
| Chr2 | 6769095  | 6772297  | 7  | 3203 | 2.49E-10    |
| Chr2 | 6784950  | 6786748  | 6  | 1799 | 8.67E-08    |
| Chr2 | 6881439  | 6883440  | 4  | 2002 | 1.33916E-05 |
| Chr2 | 6892293  | 6892863  | 4  | 571  | 2.86465E-06 |
| Chr2 | 6941811  | 6943870  | 6  | 2060 | 5.94E-09    |
| Chr2 | 6971511  | 6972905  | 7  | 1395 | 5.16159E-05 |
| Chr2 | 7009436  | 7009974  | 7  | 539  | 3.40E-12    |
| Chr2 | 7011557  | 7013450  | 6  | 1894 | 8.42E-11    |
| Chr2 | 7080760  | 7080786  | 5  | 27   | 6.54E-11    |
| Chr2 | 7115228  | 7116835  | 6  | 1608 | 1.71E-08    |
| Chr2 | 7118012  | 7119887  | 5  | 1876 | 2.20E-08    |
| Chr2 | 7190804  | 7191451  | 4  | 648  | 0.002318163 |
| Chr2 | 7224410  | 7226745  | 6  | 2336 | 6.26E-10    |
| Chr2 | 7233341  | 7237806  | 9  | 4466 | 3.34E-14    |
| Chr2 | 7780055  | 7781560  | 6  | 1506 | 4.71E-12    |
| Chr2 | 7956210  | 7956377  | 6  | 168  | 9.41E-11    |
| Chr2 | 8563257  | 8563801  | 5  | 545  | 0.000295475 |
| Chr2 | 8564826  | 8566532  | 4  | 1707 | 6.38049E-06 |
| Chr2 | 8818007  | 8820159  | 5  | 2153 | 7.03E-07    |
| Chr2 | 9123171  | 9124967  | 6  | 1797 | 6.46E-10    |
| Chr2 | 9189714  | 9192248  | 8  | 2535 | 1.83E-09    |
| Chr2 | 9195171  | 9195302  | 4  | 132  | 3.08985E-06 |
| Chr2 | 10003408 | 10005425 | 10 | 2018 | 1.15E-12    |
| Chr2 | 10356729 | 10357898 | 5  | 1170 | 1.70E-07    |
| Chr2 | 10592290 | 10593825 | 4  | 1536 | 1.25E-07    |
| Chr2 | 10602492 | 10603991 | 5  | 1500 | 1.69986E-05 |
| Chr2 | 10606918 | 10607753 | 4  | 836  | 7.08E-07    |
| Chr2 | 10875741 | 10877849 | 7  | 2109 | 2.31E-07    |
| Chr2 | 11867212 | 11867687 | 4  | 476  | 8.35131E-07 |
| Chr2 | 13223842 | 13225106 | 4  | 1265 | 0.000466516 |
| Chr2 | 13421995 | 13423424 | 5  | 1430 | 1.65E-07    |
| Chr2 | 16150572 | 16150850 | 4  | 279  | 1.64E-08    |
| Chr2 | 17338114 | 17341232 | 8  | 3119 | 3.31E-08    |
| Chr2 | 18652299 | 18655482 | 6  | 3184 | 1.18E-09    |
| Chr3 | 2808603  | 2811380  | 8  | 2778 | 4.32E-13    |

|      |          |          |    |      |             |
|------|----------|----------|----|------|-------------|
| Chr3 | 3538202  | 3539032  | 4  | 831  | 8.44147E-06 |
| Chr3 | 5278382  | 5280927  | 6  | 2546 | 6.37E-07    |
| Chr3 | 5862114  | 5862292  | 7  | 179  | 5.27E-10    |
| Chr3 | 5954908  | 5955291  | 4  | 384  | 3.38812E-05 |
| Chr3 | 8343639  | 8343828  | 4  | 190  | 5.08541E-05 |
| Chr3 | 8597952  | 8597970  | 5  | 19   | 7.15E-15    |
| Chr3 | 8843020  | 8843143  | 4  | 124  | 1.03E-07    |
| Chr3 | 8854960  | 8856963  | 8  | 2004 | 1.39E-13    |
| Chr3 | 9615411  | 9616710  | 5  | 1300 | 1.59E-09    |
| Chr3 | 9787032  | 9788260  | 6  | 1229 | 8.84E-09    |
| Chr3 | 9808394  | 9809081  | 5  | 688  | 4.92446E-07 |
| Chr3 | 10342459 | 10345250 | 7  | 2792 | 7.48E-10    |
| Chr3 | 10918581 | 10920476 | 7  | 1896 | 4.55E-12    |
| Chr3 | 11065861 | 11068156 | 6  | 2296 | 1.18601E-06 |
| Chr3 | 11098889 | 11099637 | 6  | 749  | 1.06E-08    |
| Chr3 | 11119239 | 11120549 | 4  | 1311 | 2.80531E-05 |
| Chr3 | 11329914 | 11333740 | 10 | 3827 | 1.57E-13    |
| Chr3 | 11407677 | 11409983 | 5  | 2307 | 1.94E-07    |
| Chr3 | 11421064 | 11423384 | 5  | 2321 | 4.20939E-06 |
| Chr3 | 11495256 | 11496770 | 5  | 1515 | 1.36E-07    |
| Chr3 | 11579940 | 11583604 | 11 | 3665 | 5.58E-16    |
| Chr3 | 11659887 | 11660479 | 5  | 593  | 3.99525E-06 |
| Chr3 | 11721071 | 11721901 | 4  | 831  | 4.23165E-05 |
| Chr3 | 11833422 | 11834204 | 5  | 783  | 4.47969E-06 |
| Chr3 | 11875330 | 11876561 | 7  | 1232 | 2.46E-10    |
| Chr3 | 12017065 | 12017954 | 4  | 890  | 1.47866E-06 |
| Chr3 | 12024415 | 12025613 | 4  | 1199 | 7.21669E-06 |
| Chr3 | 12029230 | 12031083 | 6  | 1854 | 6.54E-07    |
| Chr3 | 12044861 | 12047953 | 7  | 3093 | 9.29E-10    |
| Chr3 | 12108828 | 12109788 | 4  | 961  | 3.1649E-06  |
| Chr3 | 12192921 | 12195089 | 8  | 2169 | 6.39E-07    |
| Chr3 | 12207501 | 12209913 | 6  | 2413 | 2.68E-08    |
| Chr3 | 12217157 | 12217402 | 6  | 246  | 1.14E-10    |
| Chr3 | 12221511 | 12223124 | 4  | 1614 | 2.92464E-05 |
| Chr3 | 12230325 | 12231959 | 4  | 1635 | 3.40001E-06 |
| Chr3 | 12250911 | 12252062 | 4  | 1152 | 1.73462E-05 |
| Chr3 | 12293548 | 12296350 | 6  | 2803 | 1.18E-09    |
| Chr3 | 12305434 | 12307007 | 5  | 1574 | 5.44E-10    |
| Chr3 | 12335725 | 12337275 | 5  | 1551 | 1.04938E-06 |
| Chr3 | 12345211 | 12346936 | 5  | 1726 | 2.09341E-07 |
| Chr3 | 12478671 | 12480218 | 4  | 1548 | 4.31E-07    |
| Chr3 | 12482020 | 12483890 | 6  | 1871 | 7.27E-08    |
| Chr3 | 12496449 | 12497072 | 7  | 624  | 3.90E-08    |
| Chr3 | 12500469 | 12502149 | 8  | 1681 | 8.25E-10    |
| Chr3 | 12506118 | 12507288 | 4  | 1171 | 9.07E-08    |
| Chr3 | 12509377 | 12510766 | 5  | 1390 | 2.76E-08    |
| Chr3 | 12518303 | 12519205 | 4  | 903  | 0.000575024 |
| Chr3 | 12538623 | 12541688 | 8  | 3066 | 1.70E-09    |
| Chr3 | 12543019 | 12544780 | 7  | 1762 | 2.72E-09    |
| Chr3 | 12555436 | 12556928 | 5  | 1493 | 1.64E-07    |
| Chr3 | 12567933 | 12569356 | 4  | 1424 | 7.27261E-06 |
| Chr3 | 12577527 | 12579390 | 7  | 1864 | 9.07E-11    |
| Chr3 | 12676433 | 12677508 | 4  | 1076 | 3.47E-08    |
| Chr3 | 12689152 | 12691340 | 6  | 2189 | 2.62E-07    |
| Chr3 | 12699708 | 12701783 | 6  | 2076 | 2.57E-09    |
| Chr3 | 12719498 | 12723046 | 6  | 3549 | 8.16E-10    |
| Chr3 | 12750086 | 12751375 | 6  | 1290 | 1.21E-07    |
| Chr3 | 12856816 | 12858723 | 6  | 1908 | 1.47039E-06 |
| Chr3 | 12920787 | 12922545 | 6  | 1759 | 1.64E-08    |
| Chr3 | 12926006 | 12927245 | 5  | 1240 | 6.21E-07    |
| Chr3 | 12983372 | 12986127 | 8  | 2756 | 4.82E-10    |
| Chr3 | 13087298 | 13088388 | 7  | 1091 | 7.23484E-06 |
| Chr3 | 13102073 | 13103773 | 5  | 1701 | 3.45E-07    |

|      |          |          |     |      |             |
|------|----------|----------|-----|------|-------------|
| Chr3 | 13114216 | 13115082 | 4   | 867  | 1.30961E-05 |
| Chr3 | 13118019 | 13120882 | 10  | 2864 | 2.16E-10    |
| Chr3 | 13163509 | 13164275 | 5   | 767  | 2.59E-08    |
| Chr3 | 13170261 | 13171995 | 8   | 1735 | 3.41E-13    |
| Chr3 | 13188524 | 13191796 | 8   | 3273 | 1.84249E-06 |
| Chr3 | 13194377 | 13195411 | 4   | 1035 | 4.42E-07    |
| Chr3 | 13196965 | 13198149 | 4   | 1185 | 7.74178E-05 |
| Chr3 | 13214777 | 13216389 | 4   | 1613 | 2.15E-07    |
| Chr3 | 13247515 | 13248765 | 5   | 1251 | 2.28E-07    |
| Chr3 | 13343485 | 13347103 | 7   | 3619 | 1.11E-09    |
| Chr3 | 13409297 | 13410636 | 4   | 1340 | 2.36978E-05 |
| Chr3 | 13412177 | 13412508 | 5   | 332  | 4.62E-08    |
| Chr3 | 13416641 | 13418489 | 5   | 1849 | 6.48E-07    |
| Chr3 | 13427479 | 13428310 | 4   | 832  | 5.73E-09    |
| Chr3 | 13440487 | 13442664 | 13  | 2178 | 3.54E-20    |
| Chr3 | 13444561 | 13446346 | 6   | 1786 | 4.29E-08    |
| Chr3 | 13477678 | 13480572 | 7   | 2895 | 5.26E-11    |
| Chr3 | 13513114 | 13514054 | 4   | 941  | 6.05043E-05 |
| Chr3 | 13516940 | 13518065 | 4   | 1126 | 2.53094E-05 |
| Chr3 | 13550547 | 13551402 | 5   | 856  | 7.78234E-06 |
| Chr3 | 13582350 | 13584006 | 7   | 1657 | 3.44E-08    |
| Chr3 | 13586076 | 13587770 | 28  | 1695 | 6.91E-27    |
| Chr3 | 13588852 | 13593601 | 229 | 4750 | 2.27E-196   |
| Chr3 | 13596765 | 13598609 | 5   | 1845 | 0.001401172 |
| Chr3 | 13603831 | 13605645 | 6   | 1815 | 1.79E-09    |
| Chr3 | 13607578 | 13608497 | 4   | 920  | 1.78048E-05 |
| Chr3 | 13617496 | 13620045 | 5   | 2550 | 1.92E-07    |
| Chr3 | 13625329 | 13627002 | 4   | 1674 | 9.30515E-05 |
| Chr3 | 13637076 | 13639778 | 5   | 2703 | 7.01E-09    |
| Chr3 | 13654171 | 13656727 | 8   | 2557 | 3.43E-11    |
| Chr3 | 13678167 | 13678796 | 4   | 630  | 5.98994E-06 |
| Chr3 | 13707427 | 13707684 | 9   | 258  | 3.62E-14    |
| Chr3 | 13802409 | 13807380 | 15  | 4972 | 2.15E-22    |
| Chr3 | 13815531 | 13817014 | 4   | 1484 | 1.90411E-05 |
| Chr3 | 13831170 | 13833530 | 7   | 2361 | 1.44E-10    |
| Chr3 | 13874667 | 13876695 | 6   | 2029 | 7.99E-08    |
| Chr3 | 13888051 | 13889295 | 4   | 1245 | 1.90977E-06 |
| Chr3 | 13895313 | 13896906 | 4   | 1594 | 0.002443173 |
| Chr3 | 13907571 | 13908012 | 5   | 442  | 1.53081E-06 |
| Chr3 | 13909147 | 13911370 | 4   | 2224 | 5.94494E-06 |
| Chr3 | 13919703 | 13921596 | 4   | 1894 | 0.001029968 |
| Chr3 | 13934922 | 13935673 | 4   | 752  | 5.68E-07    |
| Chr3 | 13970047 | 13971866 | 5   | 1820 | 1.90E-10    |
| Chr3 | 13986353 | 13987138 | 4   | 786  | 3.06352E-06 |
| Chr3 | 14005488 | 14007289 | 6   | 1802 | 2.52615E-05 |
| Chr3 | 14026980 | 14027793 | 4   | 814  | 1.57855E-05 |
| Chr3 | 14034423 | 14035948 | 5   | 1526 | 2.74725E-06 |
| Chr3 | 14065993 | 14066834 | 4   | 842  | 1.35936E-05 |
| Chr3 | 14072897 | 14074394 | 4   | 1498 | 1.46496E-06 |
| Chr3 | 14098403 | 14099284 | 7   | 882  | 1.94E-15    |
| Chr3 | 14113587 | 14114513 | 5   | 927  | 3.69E-07    |
| Chr3 | 14122331 | 14124090 | 5   | 1760 | 1.07343E-07 |
| Chr3 | 14158747 | 14161679 | 10  | 2933 | 9.36E-15    |
| Chr3 | 14167604 | 14168226 | 6   | 623  | 2.08E-10    |
| Chr3 | 14171695 | 14172192 | 4   | 498  | 8.79E-08    |
| Chr3 | 14173265 | 14173919 | 4   | 655  | 0.0001344   |
| Chr3 | 14180358 | 14181497 | 8   | 1140 | 4.06E-07    |
| Chr3 | 14186050 | 14186581 | 4   | 532  | 8.73661E-05 |
| Chr3 | 14188574 | 14189275 | 4   | 702  | 0.000740843 |
| Chr3 | 14194191 | 14204060 | 388 | 9870 | 0           |
| Chr3 | 14205332 | 14208508 | 16  | 3177 | 7.03E-17    |
| Chr3 | 14214302 | 14215925 | 10  | 1624 | 1.32E-15    |
| Chr3 | 14217707 | 14218677 | 4   | 971  | 0.000114748 |

|      |          |          |    |      |             |
|------|----------|----------|----|------|-------------|
| Chr3 | 14221667 | 14224971 | 12 | 3305 | 1.83E-11    |
| Chr3 | 14248479 | 14250393 | 4  | 1915 | 0.000217329 |
| Chr3 | 14256123 | 14258291 | 9  | 2169 | 4.67E-10    |
| Chr3 | 14277776 | 14278920 | 4  | 1145 | 0.000146373 |
| Chr3 | 14342318 | 14344181 | 7  | 1864 | 5.50E-10    |
| Chr3 | 14345522 | 14346218 | 6  | 697  | 2.18E-08    |
| Chr3 | 14392795 | 14393357 | 4  | 563  | 0.000171421 |
| Chr3 | 14412762 | 14415674 | 9  | 2913 | 2.92E-10    |
| Chr3 | 14433797 | 14438988 | 9  | 5192 | 5.28E-14    |
| Chr3 | 14454356 | 14455492 | 4  | 1137 | 1.88E-08    |
| Chr3 | 14464144 | 14466022 | 5  | 1879 | 1.81E-07    |
| Chr3 | 14507507 | 14508093 | 4  | 587  | 2.06917E-06 |
| Chr3 | 14513209 | 14514412 | 5  | 1204 | 1.49E-10    |
| Chr3 | 14551918 | 14553197 | 4  | 1280 | 2.71359E-05 |
| Chr3 | 14556428 | 14558166 | 6  | 1739 | 4.52E-11    |
| Chr3 | 14574851 | 14575967 | 5  | 1117 | 2.64027E-05 |
| Chr3 | 14579712 | 14581550 | 6  | 1839 | 3.97E-09    |
| Chr3 | 14624455 | 14625788 | 5  | 1334 | 4.32E-08    |
| Chr3 | 14715054 | 14717240 | 4  | 2187 | 2.02082E-06 |
| Chr3 | 14770596 | 14773148 | 5  | 2553 | 5.71E-07    |
| Chr3 | 14774307 | 14775674 | 6  | 1368 | 5.26E-12    |
| Chr3 | 14793822 | 14796759 | 6  | 2938 | 1.92E-07    |
| Chr3 | 14801013 | 14803116 | 5  | 2104 | 1.41711E-06 |
| Chr3 | 14815306 | 14815642 | 4  | 337  | 9.79E-08    |
| Chr3 | 14819289 | 14820470 | 4  | 1182 | 3.12856E-06 |
| Chr3 | 14823373 | 14824309 | 5  | 937  | 4.08E-08    |
| Chr3 | 14825621 | 14827627 | 6  | 2007 | 4.74E-07    |
| Chr3 | 14849639 | 14850766 | 4  | 1128 | 3.69E-08    |
| Chr3 | 14978593 | 14983420 | 15 | 4828 | 9.53E-17    |
| Chr3 | 14985575 | 14987232 | 8  | 1658 | 4.75E-08    |
| Chr3 | 15033149 | 15034595 | 6  | 1447 | 4.26E-08    |
| Chr3 | 15083352 | 15085326 | 7  | 1975 | 1.67E-11    |
| Chr3 | 15098068 | 15100054 | 4  | 1987 | 2.83942E-05 |
| Chr3 | 15108548 | 15109659 | 5  | 1112 | 6.73E-07    |
| Chr3 | 15115602 | 15117954 | 7  | 2353 | 1.44E-08    |
| Chr3 | 15120046 | 15122752 | 10 | 2707 | 1.67E-15    |
| Chr3 | 15136919 | 15138361 | 6  | 1443 | 1.21E-07    |
| Chr3 | 15148098 | 15149088 | 4  | 991  | 1.07692E-06 |
| Chr3 | 15255192 | 15256190 | 6  | 999  | 1.14E-08    |
| Chr3 | 15257446 | 15259050 | 4  | 1605 | 9.38E-09    |
| Chr3 | 15280197 | 15281221 | 4  | 1025 | 1.54957E-06 |
| Chr3 | 15381077 | 15383001 | 8  | 1925 | 7.87E-10    |
| Chr3 | 15459335 | 15462450 | 11 | 3116 | 7.95E-13    |
| Chr3 | 15494136 | 15495263 | 4  | 1128 | 4.96304E-06 |
| Chr3 | 15497064 | 15498128 | 5  | 1065 | 2.43E-09    |
| Chr3 | 15542435 | 15543494 | 5  | 1060 | 6.18629E-06 |
| Chr3 | 15574688 | 15575748 | 6  | 1061 | 2.01318E-06 |
| Chr3 | 15580217 | 15581604 | 4  | 1388 | 4.03841E-06 |
| Chr3 | 15690170 | 15691081 | 4  | 912  | 7.34E-07    |
| Chr3 | 15692606 | 15693944 | 4  | 1339 | 1.6559E-05  |
| Chr3 | 15714886 | 15716576 | 7  | 1691 | 5.62E-07    |
| Chr3 | 15718450 | 15720027 | 8  | 1578 | 1.18E-11    |
| Chr3 | 15722152 | 15723653 | 4  | 1502 | 3.12417E-06 |
| Chr3 | 15810043 | 15810339 | 4  | 297  | 1.42E-07    |
| Chr3 | 15847418 | 15849240 | 4  | 1823 | 0.000131901 |
| Chr3 | 16340056 | 16341771 | 6  | 1716 | 2.77E-10    |
| Chr3 | 16590007 | 16591745 | 5  | 1739 | 5.69E-07    |
| Chr3 | 16601596 | 16604013 | 4  | 2418 | 1.99118E-07 |
| Chr3 | 16810616 | 16812712 | 5  | 2097 | 4.48E-07    |
| Chr3 | 16957543 | 16959452 | 7  | 1910 | 1.74E-10    |
| Chr3 | 17058827 | 17058849 | 4  | 23   | 2.00E-10    |
| Chr3 | 17431414 | 17431854 | 4  | 441  | 1.44762E-06 |
| Chr3 | 17979125 | 17979950 | 5  | 826  | 4.63E-09    |

|      |          |          |    |      |             |
|------|----------|----------|----|------|-------------|
| Chr3 | 18791259 | 18792809 | 6  | 1551 | 5.63E-10    |
| Chr3 | 18794210 | 18794992 | 5  | 783  | 7.64949E-07 |
| Chr3 | 18860144 | 18861107 | 4  | 964  | 5.86201E-06 |
| Chr3 | 19243037 | 19243582 | 4  | 546  | 9.49789E-06 |
| Chr3 | 20202088 | 20203509 | 5  | 1422 | 0.013074487 |
| Chr3 | 21324188 | 21325958 | 4  | 1771 | 1.21035E-06 |
| Chr3 | 22370259 | 22370293 | 4  | 35   | 7.69251E-06 |
| Chr3 | 23204156 | 23205360 | 7  | 1205 | 4.69E-08    |
| Chr4 | 631300   | 632262   | 4  | 963  | 1.21053E-05 |
| Chr4 | 635205   | 636829   | 4  | 1625 | 2.20E-07    |
| Chr4 | 782598   | 783526   | 4  | 929  | 2.04121E-05 |
| Chr4 | 862911   | 864329   | 4  | 1419 | 2.12279E-05 |
| Chr4 | 1019737  | 1020670  | 4  | 934  | 3.16804E-05 |
| Chr4 | 1063657  | 1063934  | 6  | 278  | 3.91E-12    |
| Chr4 | 1665796  | 1669899  | 11 | 4104 | 1.31E-11    |
| Chr4 | 1673811  | 1676660  | 10 | 2850 | 1.28E-12    |
| Chr4 | 1677941  | 1679270  | 6  | 1330 | 4.29E-11    |
| Chr4 | 1686951  | 1689180  | 4  | 2230 | 2.99967E-06 |
| Chr4 | 1695602  | 1696940  | 8  | 1339 | 9.22E-09    |
| Chr4 | 1763559  | 1764625  | 4  | 1067 | 4.20E-07    |
| Chr4 | 1797305  | 1800298  | 11 | 2994 | 1.68E-09    |
| Chr4 | 1808012  | 1809386  | 5  | 1375 | 1.46E-07    |
| Chr4 | 1816084  | 1817666  | 4  | 1583 | 9.80E-07    |
| Chr4 | 1830234  | 1831767  | 4  | 1534 | 0.000235059 |
| Chr4 | 1936948  | 1937682  | 4  | 735  | 3.77061E-06 |
| Chr4 | 1944313  | 1945800  | 5  | 1488 | 2.82539E-06 |
| Chr4 | 1947165  | 1948552  | 5  | 1388 | 3.90E-08    |
| Chr4 | 1949765  | 1951502  | 4  | 1738 | 9.3326E-06  |
| Chr4 | 1977450  | 1978395  | 4  | 946  | 9.68E-07    |
| Chr4 | 2000012  | 2001972  | 6  | 1961 | 2.41E-07    |
| Chr4 | 2006197  | 2007341  | 6  | 1145 | 1.74E-08    |
| Chr4 | 2013521  | 2014178  | 4  | 658  | 9.29E-07    |
| Chr4 | 2040737  | 2042120  | 5  | 1384 | 1.07054E-06 |
| Chr4 | 2048669  | 2050121  | 4  | 1453 | 7.59981E-05 |
| Chr4 | 2142788  | 2143026  | 5  | 239  | 2.35E-07    |
| Chr4 | 2160859  | 2162104  | 4  | 1246 | 2.59902E-06 |
| Chr4 | 2247297  | 2248145  | 4  | 849  | 2.45E-07    |
| Chr4 | 2282413  | 2283463  | 4  | 1051 | 5.69457E-05 |
| Chr4 | 2284514  | 2285574  | 5  | 1061 | 2.59E-08    |
| Chr4 | 2287008  | 2288001  | 6  | 994  | 9.41E-11    |
| Chr4 | 2358462  | 2358673  | 4  | 212  | 2.45446E-06 |
| Chr4 | 2360026  | 2361216  | 6  | 1191 | 4.30E-08    |
| Chr4 | 2597829  | 2601870  | 12 | 4042 | 1.27E-17    |
| Chr4 | 2708603  | 2708965  | 4  | 363  | 1.84694E-06 |
| Chr4 | 2832474  | 2834132  | 8  | 1659 | 9.65E-11    |
| Chr4 | 2881356  | 2882808  | 4  | 1453 | 4.41145E-05 |
| Chr4 | 2887215  | 2889640  | 6  | 2426 | 3.84E-08    |
| Chr4 | 2893985  | 2895234  | 4  | 1250 | 1.08E-08    |
| Chr4 | 2897835  | 2900579  | 6  | 2745 | 1.31075E-06 |
| Chr4 | 2953430  | 2953946  | 4  | 517  | 1.37622E-06 |
| Chr4 | 2963340  | 2964223  | 5  | 884  | 2.51E-07    |
| Chr4 | 2968784  | 2969485  | 5  | 702  | 1.80579E-05 |
| Chr4 | 2980622  | 2981598  | 4  | 977  | 4.16788E-05 |
| Chr4 | 3003175  | 3004112  | 4  | 938  | 0.000162813 |
| Chr4 | 3010509  | 3012683  | 7  | 2175 | 1.50E-08    |
| Chr4 | 3018739  | 3022561  | 7  | 3823 | 3.39E-11    |
| Chr4 | 3044496  | 3045226  | 5  | 731  | 1.69131E-05 |
| Chr4 | 3054362  | 3056928  | 13 | 2567 | 2.53E-08    |
| Chr4 | 3079416  | 3081531  | 9  | 2116 | 6.66E-10    |
| Chr4 | 3090740  | 3092367  | 6  | 1628 | 2.40E-07    |
| Chr4 | 3099110  | 3099370  | 4  | 261  | 1.31483E-05 |
| Chr4 | 3102623  | 3105194  | 10 | 2572 | 4.63E-16    |
| Chr4 | 3157175  | 3158769  | 5  | 1595 | 3.16138E-06 |

|      |         |         |     |      |             |
|------|---------|---------|-----|------|-------------|
| Chr4 | 3164509 | 3165643 | 4   | 1135 | 7.76E-07    |
| Chr4 | 3178270 | 3179121 | 4   | 852  | 1.76E-07    |
| Chr4 | 3180310 | 3181116 | 4   | 807  | 3.01E-07    |
| Chr4 | 3182512 | 3183929 | 5   | 1418 | 6.53E-07    |
| Chr4 | 3264342 | 3266037 | 4   | 1696 | 8.29958E-06 |
| Chr4 | 3270346 | 3273346 | 10  | 3001 | 8.44E-15    |
| Chr4 | 3274605 | 3276983 | 11  | 2379 | 6.11E-14    |
| Chr4 | 3351698 | 3353190 | 4   | 1493 | 5.84571E-05 |
| Chr4 | 3374482 | 3377739 | 9   | 3258 | 5.75E-13    |
| Chr4 | 3383864 | 3384566 | 4   | 703  | 2.33323E-05 |
| Chr4 | 3385798 | 3388085 | 7   | 2288 | 4.24E-09    |
| Chr4 | 3411389 | 3413392 | 4   | 2004 | 6.25118E-06 |
| Chr4 | 3436088 | 3438934 | 8   | 2847 | 1.21E-11    |
| Chr4 | 3467095 | 3469818 | 9   | 2724 | 5.71E-13    |
| Chr4 | 3480220 | 3482095 | 8   | 1876 | 2.19E-10    |
| Chr4 | 3483375 | 3485084 | 5   | 1710 | 2.5038E-05  |
| Chr4 | 3488638 | 3490609 | 8   | 1972 | 3.21E-09    |
| Chr4 | 3493368 | 3494962 | 8   | 1595 | 5.50E-07    |
| Chr4 | 3498526 | 3500152 | 6   | 1627 | 1.24E-07    |
| Chr4 | 3588337 | 3589931 | 5   | 1595 | 9.85E-09    |
| Chr4 | 3618660 | 3619500 | 4   | 841  | 3.44E-07    |
| Chr4 | 3624612 | 3625669 | 6   | 1058 | 1.26E-12    |
| Chr4 | 3628278 | 3629546 | 5   | 1269 | 6.12E-10    |
| Chr4 | 3631009 | 3631244 | 4   | 236  | 1.81227E-06 |
| Chr4 | 3634393 | 3635580 | 5   | 1188 | 1.37E-07    |
| Chr4 | 3649793 | 3651458 | 4   | 1666 | 1.17E-08    |
| Chr4 | 3693978 | 3694529 | 4   | 552  | 6.21982E-05 |
| Chr4 | 3695683 | 3696137 | 4   | 455  | 0.000345529 |
| Chr4 | 3698830 | 3700922 | 4   | 2093 | 4.25E-07    |
| Chr4 | 3715874 | 3716971 | 4   | 1098 | 2.14E-08    |
| Chr4 | 3736056 | 3737094 | 6   | 1039 | 6.68E-07    |
| Chr4 | 3739664 | 3743723 | 12  | 4060 | 3.46E-13    |
| Chr4 | 3749265 | 3751519 | 4   | 2255 | 4.97618E-05 |
| Chr4 | 3755078 | 3756531 | 5   | 1454 | 6.41372E-06 |
| Chr4 | 3784808 | 3789640 | 9   | 4833 | 1.52E-09    |
| Chr4 | 3839241 | 3840777 | 5   | 1537 | 4.42E-07    |
| Chr4 | 3864710 | 3865661 | 5   | 952  | 1.54546E-06 |
| Chr4 | 3871660 | 3873786 | 10  | 2127 | 8.22E-14    |
| Chr4 | 3908969 | 3910623 | 6   | 1655 | 1.0973E-07  |
| Chr4 | 3915552 | 3916483 | 4   | 932  | 1.10403E-05 |
| Chr4 | 3934701 | 3937033 | 5   | 2333 | 5.49E-07    |
| Chr4 | 3942460 | 3943611 | 4   | 1152 | 1.3193E-05  |
| Chr4 | 3950572 | 3955925 | 246 | 5354 | 2.19E-167   |
| Chr4 | 3964615 | 3966875 | 16  | 2261 | 2.18E-10    |
| Chr4 | 3968310 | 3969524 | 9   | 1215 | 8.77E-12    |
| Chr4 | 3977700 | 3980451 | 25  | 2752 | 1.77E-27    |
| Chr4 | 3982400 | 3983540 | 11  | 1141 | 3.41E-11    |
| Chr4 | 3989538 | 3990859 | 4   | 1322 | 2.07E-07    |
| Chr4 | 3992559 | 3992802 | 5   | 244  | 1.27E-08    |
| Chr4 | 3994093 | 3995564 | 11  | 1472 | 2.31E-11    |
| Chr4 | 3999914 | 4000477 | 7   | 564  | 1.53E-07    |
| Chr4 | 4003709 | 4004228 | 12  | 520  | 7.69E-13    |
| Chr4 | 4007195 | 4007362 | 8   | 168  | 1.49E-09    |
| Chr4 | 4008777 | 4011483 | 10  | 2707 | 3.49E-11    |
| Chr4 | 4016285 | 4016403 | 4   | 119  | 8.26E-09    |
| Chr4 | 4024336 | 4026357 | 6   | 2022 | 5.86E-07    |
| Chr4 | 4037521 | 4038571 | 5   | 1051 | 2.21E-09    |
| Chr4 | 4101794 | 4103010 | 4   | 1217 | 9.42E-08    |
| Chr4 | 4159425 | 4160926 | 5   | 1502 | 4.10284E-06 |
| Chr4 | 4183547 | 4185654 | 7   | 2108 | 8.81E-10    |
| Chr4 | 4239848 | 4243251 | 17  | 3404 | 2.42E-17    |
| Chr4 | 4249564 | 4250784 | 4   | 1221 | 6.65E-07    |
| Chr4 | 4269539 | 4270047 | 6   | 509  | 4.66E-09    |

|      |         |         |    |      |             |
|------|---------|---------|----|------|-------------|
| Chr4 | 4278509 | 4283186 | 13 | 4678 | 2.28E-15    |
| Chr4 | 4304087 | 4305534 | 6  | 1448 | 1.12E-09    |
| Chr4 | 4360495 | 4362001 | 5  | 1507 | 9.39E-08    |
| Chr4 | 4388847 | 4388680 | 6  | 1834 | 6.27E-07    |
| Chr4 | 4391737 | 4394485 | 8  | 2749 | 1.07E-11    |
| Chr4 | 4400192 | 4401278 | 5  | 1087 | 8.47E-09    |
| Chr4 | 4405013 | 4405901 | 5  | 889  | 1.72E-09    |
| Chr4 | 4425622 | 4427061 | 5  | 1440 | 1.03E-07    |
| Chr4 | 4440701 | 4441912 | 6  | 1212 | 1.31552E-06 |
| Chr4 | 4451884 | 4453493 | 4  | 1610 | 1.70E-08    |
| Chr4 | 4489139 | 4491955 | 5  | 2817 | 9.29E-08    |
| Chr4 | 4530543 | 4531902 | 5  | 1360 | 4.17E-08    |
| Chr4 | 4543286 | 4544517 | 4  | 1232 | 1.04693E-06 |
| Chr4 | 4559972 | 4561094 | 5  | 1123 | 9.54E-08    |
| Chr4 | 4564112 | 4565319 | 7  | 1208 | 1.01E-07    |
| Chr4 | 4609301 | 4609627 | 4  | 327  | 4.17309E-06 |
| Chr4 | 4646774 | 4648181 | 4  | 1408 | 1.08497E-06 |
| Chr4 | 4681051 | 4682269 | 4  | 1219 | 0.000290705 |
| Chr4 | 4710407 | 4712030 | 5  | 1624 | 6.09732E-06 |
| Chr4 | 4726524 | 4727905 | 4  | 1382 | 3.93133E-06 |
| Chr4 | 4731557 | 4734440 | 10 | 2884 | 1.33E-11    |
| Chr4 | 4739634 | 4740566 | 4  | 933  | 0.000138967 |
| Chr4 | 4744353 | 4745648 | 4  | 1296 | 7.64E-07    |
| Chr4 | 4746987 | 4748972 | 4  | 1986 | 6.21624E-06 |
| Chr4 | 4758543 | 4761710 | 8  | 3168 | 3.08E-13    |
| Chr4 | 4770291 | 4772394 | 6  | 2104 | 2.97E-09    |
| Chr4 | 4775904 | 4779141 | 10 | 3238 | 3.11E-14    |
| Chr4 | 4835486 | 4836913 | 4  | 1428 | 6.01202E-06 |
| Chr4 | 4926309 | 4927499 | 4  | 1191 | 4.35192E-05 |
| Chr4 | 4933249 | 4933944 | 5  | 696  | 1.24E-07    |
| Chr4 | 4945645 | 4946560 | 4  | 916  | 3.79E-07    |
| Chr4 | 4958954 | 4959755 | 5  | 802  | 1.75963E-05 |
| Chr4 | 4961702 | 4962543 | 4  | 842  | 1.89046E-06 |
| Chr4 | 4965810 | 4966106 | 4  | 297  | 5.83E-08    |
| Chr4 | 5022695 | 5024463 | 9  | 1769 | 2.36E-11    |
| Chr4 | 5039879 | 5040532 | 4  | 654  | 0.000101327 |
| Chr4 | 5042441 | 5045198 | 9  | 2758 | 1.31E-13    |
| Chr4 | 5049132 | 5051892 | 7  | 2761 | 7.87E-10    |
| Chr4 | 5060383 | 5061800 | 5  | 1418 | 2.36978E-06 |
| Chr4 | 5069701 | 5072010 | 4  | 2310 | 4.88E-07    |
| Chr4 | 5076671 | 5078945 | 7  | 2275 | 1.32E-09    |
| Chr4 | 5090702 | 5092627 | 5  | 1926 | 3.48E-07    |
| Chr4 | 5100972 | 5101317 | 5  | 346  | 6.84E-07    |
| Chr4 | 5307054 | 5308270 | 5  | 1217 | 6.17262E-06 |
| Chr4 | 5348408 | 5348906 | 4  | 499  | 9.8041E-07  |
| Chr4 | 5528302 | 5530014 | 4  | 1713 | 1.51028E-05 |
| Chr4 | 5532656 | 5534023 | 8  | 1368 | 2.31E-14    |
| Chr4 | 5666456 | 5667496 | 4  | 1041 | 5.72846E-06 |
| Chr4 | 5939681 | 5940635 | 4  | 955  | 3.17E-07    |
| Chr4 | 5954515 | 5956010 | 5  | 1496 | 7.30E-11    |
| Chr4 | 5966478 | 5967343 | 4  | 866  | 1.04907E-06 |
| Chr4 | 5987651 | 5988436 | 4  | 786  | 2.50486E-05 |
| Chr4 | 6068499 | 6072148 | 7  | 3650 | 4.81E-10    |
| Chr4 | 6529484 | 6529801 | 5  | 318  | 6.73484E-07 |
| Chr4 | 6531848 | 6536557 | 11 | 4710 | 1.14E-10    |
| Chr4 | 6654061 | 6655935 | 6  | 1875 | 2.64E-09    |
| Chr4 | 6723506 | 6724941 | 5  | 1436 | 1.21E-08    |
| Chr4 | 6726044 | 6727535 | 4  | 1492 | 7.89E-07    |
| Chr4 | 6730348 | 6730378 | 4  | 31   | 2.66091E-06 |
| Chr4 | 7688170 | 7688682 | 5  | 513  | 2.01E-09    |
| Chr4 | 8318216 | 8318582 | 4  | 367  | 8.67638E-05 |
| Chr4 | 8900939 | 8902682 | 6  | 1744 | 2.67E-07    |
| Chr4 | 8905697 | 8906424 | 4  | 728  | 2.31271E-05 |

|      |          |          |    |      |             |
|------|----------|----------|----|------|-------------|
| Chr4 | 9735323  | 9737742  | 6  | 2420 | 3.58E-09    |
| Chr4 | 9955990  | 9957015  | 4  | 1026 | 0.00010837  |
| Chr4 | 10992973 | 10995146 | 4  | 2174 | 8.36269E-06 |
| Chr4 | 10996219 | 10997948 | 7  | 1730 | 5.21E-10    |
| Chr4 | 11037398 | 11039430 | 6  | 2033 | 4.27E-07    |
| Chr4 | 11363413 | 11364365 | 4  | 953  | 6.75E-07    |
| Chr4 | 11366214 | 11367922 | 8  | 1709 | 3.28E-10    |
| Chr4 | 11820227 | 11821370 | 4  | 1144 | 1.63578E-05 |
| Chr4 | 13572245 | 13572745 | 4  | 501  | 2.62859E-05 |
| Chr4 | 13627248 | 13628949 | 7  | 1702 | 4.74E-11    |
| Chr4 | 13630630 | 13631928 | 6  | 1299 | 4.63E-07    |
| Chr4 | 13887279 | 13888105 | 4  | 827  | 1.72083E-06 |
| Chr4 | 14283523 | 14284784 | 5  | 1262 | 2.524E-05   |
| Chr4 | 15554684 | 15555108 | 4  | 425  | 1.52E-07    |
| Chr4 | 17714562 | 17715757 | 4  | 1196 | 3.6103E-05  |
| Chr5 | 64895    | 69541    | 20 | 4647 | 5.90E-27    |
| Chr5 | 137079   | 138792   | 5  | 1714 | 1.42155E-06 |
| Chr5 | 2257869  | 2259789  | 10 | 1921 | 1.00E-14    |
| Chr5 | 2392045  | 2395622  | 13 | 3578 | 1.98E-10    |
| Chr5 | 3253169  | 3253271  | 8  | 103  | 7.50E-13    |
| Chr5 | 4324247  | 4325423  | 5  | 1177 | 3.49E-07    |
| Chr5 | 5218548  | 5220608  | 9  | 2061 | 1.25E-11    |
| Chr5 | 6207791  | 6209091  | 5  | 1301 | 3.27437E-06 |
| Chr5 | 6405363  | 6406434  | 4  | 1072 | 4.20E-07    |
| Chr5 | 6630872  | 6633406  | 9  | 2535 | 3.72E-08    |
| Chr5 | 7027636  | 7028616  | 6  | 981  | 2.89E-07    |
| Chr5 | 8313343  | 8313400  | 4  | 58   | 1.72E-07    |
| Chr5 | 8549745  | 8550752  | 4  | 1008 | 3.36461E-06 |
| Chr5 | 8573327  | 8574528  | 6  | 1202 | 8.95E-11    |
| Chr5 | 8576140  | 8577067  | 5  | 928  | 7.55E-08    |
| Chr5 | 8716378  | 8717272  | 4  | 895  | 3.84713E-05 |
| Chr5 | 9412940  | 9416716  | 7  | 3777 | 4.17E-10    |
| Chr5 | 9711193  | 9713515  | 5  | 2323 | 8.05E-07    |
| Chr5 | 9892089  | 9893318  | 4  | 1230 | 4.8029E-06  |
| Chr5 | 9927887  | 9929295  | 7  | 1409 | 1.53E-12    |
| Chr5 | 9996749  | 9998364  | 5  | 1616 | 2.25167E-06 |
| Chr5 | 10060969 | 10061973 | 4  | 1005 | 3.18237E-06 |
| Chr5 | 10094828 | 10096188 | 5  | 1361 | 1.81E-07    |
| Chr5 | 10097611 | 10099827 | 7  | 2217 | 2.92E-11    |
| Chr5 | 10101962 | 10106880 | 10 | 4919 | 7.97E-10    |
| Chr5 | 10256431 | 10260491 | 9  | 4061 | 1.09E-11    |
| Chr5 | 10350636 | 10352082 | 5  | 1447 | 1.15E-08    |
| Chr5 | 10364478 | 10366234 | 5  | 1757 | 1.13E-09    |
| Chr5 | 10583814 | 10584332 | 4  | 519  | 2.25177E-06 |
| Chr5 | 10589989 | 10591210 | 5  | 1222 | 8.04652E-07 |
| Chr5 | 10605433 | 10607380 | 6  | 1948 | 2.26E-10    |
| Chr5 | 10626413 | 10627266 | 4  | 854  | 1.94577E-06 |
| Chr5 | 10711015 | 10712607 | 4  | 1593 | 4.07479E-05 |
| Chr5 | 10811075 | 10813158 | 4  | 2084 | 1.28242E-05 |
| Chr5 | 10903293 | 10904116 | 6  | 824  | 6.84E-07    |
| Chr5 | 10958431 | 10959525 | 4  | 1095 | 1.93136E-05 |
| Chr5 | 11044137 | 11044333 | 4  | 197  | 2.72E-08    |
| Chr5 | 11047264 | 11048193 | 4  | 930  | 7.38E-07    |
| Chr5 | 11079058 | 11080292 | 5  | 1235 | 5.81382E-07 |
| Chr5 | 11086882 | 11087704 | 4  | 823  | 4.00E-08    |
| Chr5 | 11103112 | 11104193 | 5  | 1082 | 2.33256E-05 |
| Chr5 | 11128165 | 11129365 | 5  | 1201 | 1.07E-10    |
| Chr5 | 11137021 | 11138323 | 4  | 1303 | 6.69254E-05 |
| Chr5 | 11139615 | 11141360 | 5  | 1746 | 5.119E-05   |
| Chr5 | 11145102 | 11146594 | 6  | 1493 | 4.10E-08    |
| Chr5 | 11172214 | 11174725 | 5  | 2512 | 5.84056E-06 |
| Chr5 | 11178944 | 11182327 | 11 | 3384 | 1.26E-14    |
| Chr5 | 11184800 | 11188238 | 41 | 3439 | 2.14E-31    |



|      |          |          |     |       |             |
|------|----------|----------|-----|-------|-------------|
| Chr5 | 11207708 | 11210395 | 7   | 2688  | 1.81E-08    |
| Chr5 | 11315891 | 11316857 | 4   | 967   | 4.49E-08    |
| Chr5 | 11319244 | 11320194 | 4   | 951   | 4.71011E-06 |
| Chr5 | 11326382 | 11328328 | 5   | 1947  | 9.73E-08    |
| Chr5 | 11335134 | 11336907 | 4   | 1774  | 3.83E-07    |
| Chr5 | 11352606 | 11354262 | 5   | 1657  | 5.26E-07    |
| Chr5 | 11391670 | 11392735 | 5   | 1066  | 4.78E-07    |
| Chr5 | 11398380 | 11399815 | 7   | 1436  | 1.03E-07    |
| Chr5 | 11421479 | 11424535 | 8   | 3057  | 2.37E-10    |
| Chr5 | 11432181 | 11434032 | 5   | 1852  | 1.57E-08    |
| Chr5 | 11460509 | 11463018 | 7   | 2510  | 5.63E-07    |
| Chr5 | 11475204 | 11479887 | 12  | 4684  | 1.96E-14    |
| Chr5 | 11481755 | 11483360 | 4   | 1606  | 7.48E-08    |
| Chr5 | 11507021 | 11509831 | 5   | 2811  | 2.80E-11    |
| Chr5 | 11563605 | 11565882 | 6   | 2278  | 1.90643E-06 |
| Chr5 | 11569535 | 11572058 | 9   | 2524  | 1.28E-12    |
| Chr5 | 11578137 | 11579796 | 5   | 1660  | 5.04E-07    |
| Chr5 | 11599985 | 11602039 | 4   | 2055  | 3.27468E-06 |
| Chr5 | 11646669 | 11649583 | 6   | 2915  | 1.62E-08    |
| Chr5 | 11651133 | 11652563 | 5   | 1431  | 2.66E-07    |
| Chr5 | 11653812 | 11655850 | 4   | 2039  | 2.67661E-05 |
| Chr5 | 11690188 | 11691006 | 6   | 819   | 5.37E-08    |
| Chr5 | 11701507 | 11710254 | 55  | 8748  | 5.27E-39    |
| Chr5 | 11722873 | 11724238 | 13  | 1366  | 6.43E-11    |
| Chr5 | 11726122 | 11736280 | 114 | 10159 | 3.40E-88    |
| Chr5 | 11750489 | 11751916 | 4   | 1428  | 3.28664E-06 |
| Chr5 | 11755813 | 11757241 | 7   | 1429  | 1.33594E-06 |
| Chr5 | 11762695 | 11765507 | 7   | 2813  | 2.66E-08    |
| Chr5 | 11771290 | 11772295 | 5   | 1006  | 1.57E-07    |
| Chr5 | 11776107 | 11778999 | 7   | 2893  | 1.67E-07    |
| Chr5 | 11782792 | 11785351 | 7   | 2560  | 1.04E-10    |
| Chr5 | 11787883 | 11790091 | 8   | 2209  | 1.59271E-05 |
| Chr5 | 11793993 | 11796956 | 8   | 2964  | 7.56E-07    |
| Chr5 | 11803773 | 11805395 | 5   | 1623  | 1.20E-07    |
| Chr5 | 11806643 | 11810776 | 8   | 4134  | 3.85E-11    |
| Chr5 | 11813799 | 11815026 | 4   | 1228  | 7.79226E-06 |
| Chr5 | 11833457 | 11836225 | 6   | 2769  | 7.59E-07    |
| Chr5 | 11842073 | 11843745 | 15  | 1673  | 1.39E-17    |
| Chr5 | 11868432 | 11869447 | 5   | 1016  | 2.30937E-06 |
| Chr5 | 11912408 | 11915506 | 10  | 3099  | 1.09E-11    |
| Chr5 | 11916871 | 11919460 | 4   | 2590  | 3.94797E-06 |
| Chr5 | 11921375 | 11923101 | 4   | 1727  | 1.10801E-05 |
| Chr5 | 11936319 | 11944506 | 68  | 8188  | 2.73E-52    |
| Chr5 | 11973082 | 11974655 | 4   | 1574  | 6.97986E-06 |
| Chr5 | 11980254 | 11982382 | 5   | 2129  | 2.50E-11    |
| Chr5 | 11986504 | 11987822 | 6   | 1319  | 6.43E-07    |
| Chr5 | 12007653 | 12009897 | 7   | 2245  | 8.99E-11    |
| Chr5 | 12011003 | 12011846 | 4   | 844   | 3.10911E-05 |
| Chr5 | 12019272 | 12021272 | 7   | 2001  | 2.02E-10    |
| Chr5 | 12029560 | 12031301 | 8   | 1742  | 6.75E-11    |
| Chr5 | 12032948 | 12034990 | 7   | 2043  | 6.04E-11    |
| Chr5 | 12037262 | 12040679 | 8   | 3418  | 9.13E-09    |
| Chr5 | 12041825 | 12043495 | 4   | 1671  | 1.04092E-06 |
| Chr5 | 12044614 | 12046315 | 6   | 1702  | 1.6404E-05  |
| Chr5 | 12101285 | 12104350 | 6   | 3066  | 9.51E-08    |
| Chr5 | 12110338 | 12112538 | 7   | 2201  | 6.21E-10    |
| Chr5 | 12116407 | 12117256 | 5   | 850   | 1.0223E-05  |
| Chr5 | 12125032 | 12128376 | 13  | 3345  | 5.24E-17    |
| Chr5 | 12134036 | 12136515 | 7   | 2480  | 6.18E-10    |
| Chr5 | 12142934 | 12148284 | 14  | 5351  | 5.66E-14    |
| Chr5 | 12153783 | 12156186 | 6   | 2404  | 2.18E-08    |
| Chr5 | 12160316 | 12164175 | 8   | 3860  | 7.98E-11    |
| Chr5 | 12174792 | 12175964 | 5   | 1173  | 1.77E-09    |

|      |          |          |    |      |             |
|------|----------|----------|----|------|-------------|
| Chr5 | 12192223 | 12193368 | 4  | 1146 | 1.58844E-06 |
| Chr5 | 12226858 | 12229799 | 8  | 2942 | 3.02E-11    |
| Chr5 | 12236212 | 12239558 | 9  | 3347 | 9.85E-15    |
| Chr5 | 12240752 | 12242274 | 5  | 1523 | 4.40E-09    |
| Chr5 | 12246171 | 12246797 | 5  | 627  | 5.40479E-07 |
| Chr5 | 12318312 | 12320943 | 5  | 2632 | 1.94E-07    |
| Chr5 | 12327428 | 12329932 | 7  | 2505 | 1.03E-10    |
| Chr5 | 12342476 | 12344803 | 8  | 2328 | 1.59E-08    |
| Chr5 | 12346449 | 12348863 | 9  | 2415 | 7.50E-11    |
| Chr5 | 12366838 | 12368170 | 6  | 1333 | 4.10E-07    |
| Chr5 | 12369534 | 12370318 | 4  | 785  | 1.38389E-05 |
| Chr5 | 12398451 | 12399369 | 11 | 919  | 5.10E-15    |
| Chr5 | 12430779 | 12431925 | 6  | 1147 | 3.68649E-07 |
| Chr5 | 12471055 | 12472537 | 5  | 1483 | 6.56E-07    |
| Chr5 | 12506191 | 12508554 | 4  | 2364 | 4.91678E-05 |
| Chr5 | 12511026 | 12512412 | 4  | 1387 | 6.09793E-06 |
| Chr5 | 12517217 | 12519694 | 6  | 2478 | 1.70E-09    |
| Chr5 | 12523310 | 12524220 | 8  | 911  | 1.08E-10    |
| Chr5 | 12529805 | 12532836 | 9  | 3032 | 2.02E-09    |
| Chr5 | 12534220 | 12536287 | 8  | 2068 | 1.93E-11    |
| Chr5 | 12578381 | 12581778 | 9  | 3398 | 6.92E-13    |
| Chr5 | 12609812 | 12611488 | 4  | 1677 | 3.81E-07    |
| Chr5 | 12636918 | 12637823 | 6  | 906  | 5.98E-09    |
| Chr5 | 12645266 | 12647755 | 7  | 2490 | 1.72E-09    |
| Chr5 | 12650276 | 12651051 | 4  | 776  | 6.60183E-06 |
| Chr5 | 12714278 | 12716468 | 4  | 2191 | 6.08899E-05 |
| Chr5 | 12744506 | 12746783 | 7  | 2278 | 1.56E-07    |
| Chr5 | 12752526 | 12754111 | 5  | 1586 | 4.92E-08    |
| Chr5 | 12756160 | 12758896 | 7  | 2737 | 4.27E-10    |
| Chr5 | 12760674 | 12762695 | 11 | 2022 | 2.22E-18    |
| Chr5 | 12767730 | 12769116 | 6  | 1387 | 2.45E-08    |
| Chr5 | 12770423 | 12772448 | 4  | 2026 | 2.42E-07    |
| Chr5 | 12916654 | 12917582 | 4  | 929  | 7.16E-08    |
| Chr5 | 12936690 | 12937277 | 5  | 588  | 5.26E-08    |
| Chr5 | 12946594 | 12947219 | 5  | 626  | 1.06E-09    |
| Chr5 | 12969023 | 12971229 | 5  | 2207 | 1.37E-08    |
| Chr5 | 13002978 | 13003905 | 4  | 928  | 1.41E-07    |
| Chr5 | 13022384 | 13026314 | 10 | 3931 | 2.12E-12    |
| Chr5 | 13030322 | 13031442 | 4  | 1121 | 2.12379E-06 |
| Chr5 | 13033896 | 13036669 | 8  | 2774 | 3.15E-08    |
| Chr5 | 13089714 | 13090177 | 4  | 464  | 5.35617E-05 |
| Chr5 | 13130687 | 13133202 | 6  | 2516 | 4.23E-08    |
| Chr5 | 13158496 | 13159976 | 4  | 1481 | 4.00E-07    |
| Chr5 | 13181691 | 13182955 | 4  | 1265 | 3.05134E-05 |
| Chr5 | 13187634 | 13188579 | 4  | 946  | 1.17274E-06 |
| Chr5 | 13282274 | 13284040 | 5  | 1767 | 6.82E-08    |
| Chr5 | 13295141 | 13297208 | 4  | 2068 | 5.45395E-06 |
| Chr5 | 13300031 | 13302402 | 7  | 2372 | 5.45E-10    |
| Chr5 | 13323739 | 13324464 | 4  | 726  | 6.47468E-05 |
| Chr5 | 13372938 | 13374776 | 7  | 1839 | 1.48E-11    |
| Chr5 | 13496036 | 13497208 | 4  | 1173 | 8.28E-08    |
| Chr5 | 13887996 | 13889618 | 5  | 1623 | 2.60E-11    |
| Chr5 | 13929264 | 13930663 | 4  | 1400 | 3.59E-08    |
| Chr5 | 13961919 | 13963717 | 9  | 1799 | 4.86E-13    |
| Chr5 | 13969228 | 13969739 | 5  | 512  | 2.21E-09    |
| Chr5 | 14206637 | 14207158 | 4  | 522  | 1.78086E-06 |
| Chr5 | 14256542 | 14257725 | 12 | 1184 | 6.04E-14    |
| Chr5 | 14259633 | 14262578 | 11 | 2946 | 2.31E-18    |
| Chr5 | 14271315 | 14272422 | 4  | 1108 | 1.75E-08    |
| Chr5 | 14573999 | 14574989 | 4  | 991  | 1.41936E-06 |
| Chr5 | 14589737 | 14589768 | 4  | 32   | 5.96E-07    |
| Chr5 | 14680453 | 14681112 | 4  | 660  | 1.19001E-06 |
| Chr5 | 14828380 | 14829407 | 4  | 1028 | 6.46E-09    |

|      |          |          |   |      |             |
|------|----------|----------|---|------|-------------|
| Chr5 | 14832440 | 14834144 | 5 | 1705 | 9.31E-07    |
| Chr5 | 15238199 | 15239883 | 6 | 1685 | 2.95E-08    |
| Chr5 | 15353064 | 15353455 | 4 | 392  | 7.39E-07    |
| Chr5 | 15495315 | 15496099 | 7 | 785  | 3.43E-09    |
| Chr5 | 15649596 | 15650419 | 4 | 824  | 1.45866E-06 |
| Chr5 | 15947311 | 15948027 | 5 | 717  | 1.39E-07    |
| Chr5 | 16033725 | 16033745 | 6 | 21   | 8.28E-13    |
| Chr5 | 16699263 | 16700914 | 6 | 1652 | 2.21E-09    |
| Chr5 | 16970709 | 16971023 | 4 | 315  | 3.58E-08    |
| Chr5 | 17598115 | 17599110 | 6 | 996  | 4.58E-09    |
| Chr5 | 17602464 | 17604580 | 7 | 2117 | 3.33E-10    |
| Chr5 | 18144786 | 18146442 | 6 | 1657 | 3.57E-07    |
| Chr5 | 18170435 | 18171923 | 5 | 1489 | 6.67E-07    |
| Chr5 | 18473862 | 18475139 | 5 | 1278 | 6.62394E-06 |
| Chr5 | 18625048 | 18625337 | 4 | 290  | 7.56E-07    |
| Chr5 | 18937950 | 18938828 | 6 | 879  | 3.55E-07    |
| Chr5 | 19192318 | 19194076 | 4 | 1759 | 2.06008E-05 |
| Chr5 | 19360369 | 19363263 | 8 | 2895 | 2.10E-11    |
| Chr5 | 20803534 | 20804070 | 4 | 537  | 2.28E-09    |
| Chr5 | 21545678 | 21547119 | 5 | 1442 | 1.64E-08    |
| Chr5 | 21689740 | 21690568 | 7 | 829  | 7.87E-11    |
| Chr5 | 22614756 | 22616982 | 7 | 2227 | 5.42E-08    |
| Chr5 | 26069849 | 26070816 | 4 | 968  | 1.06381E-06 |
| Chr5 | 26209923 | 26210219 | 7 | 297  | 3.65E-11    |

**-Pit Shoot 7dat (Hypo-DMRs)**

| <b>Chromosome</b> | <b>Start</b> | <b>End</b> | <b>number of DMCs</b> | <b>DMR lenght</b> | <b>P-value</b> |
|-------------------|--------------|------------|-----------------------|-------------------|----------------|
| Chr1              | 4331464      | 4333344    | 4                     | 1881              | 0.000300095    |
| Chr1              | 7355052      | 7357260    | 9                     | 2209              | 2.98E-11       |
| Chr1              | 7360580      | 7362579    | 6                     | 2000              | 3.14436E-05    |
| Chr1              | 8865040      | 8865096    | 4                     | 57                | 4.17384E-06    |
| Chr1              | 10723623     | 10724736   | 5                     | 1114              | 3.33E-08       |
| Chr1              | 12855916     | 12857007   | 4                     | 1092              | 4.02E-07       |
| Chr1              | 13100598     | 13102038   | 4                     | 1441              | 3.69615E-06    |
| Chr1              | 13187148     | 13188767   | 5                     | 1620              | 7.38313E-06    |
| Chr1              | 13442458     | 13442995   | 5                     | 538               | 2.87E-09       |
| Chr1              | 13514503     | 13515434   | 4                     | 932               | 0.000118154    |
| Chr1              | 13941767     | 13945017   | 7                     | 3251              | 1.04E-09       |
| Chr1              | 13957440     | 13958507   | 4                     | 1068              | 3.49737E-06    |
| Chr1              | 14092814     | 14094304   | 5                     | 1491              | 3.09884E-06    |
| Chr1              | 14198403     | 14199846   | 6                     | 1444              | 2.09E-08       |
| Chr1              | 14220395     | 14221326   | 4                     | 932               | 3.27728E-05    |
| Chr1              | 14223049     | 14223741   | 5                     | 693               | 1.21E-07       |
| Chr1              | 14234472     | 14236651   | 4                     | 2180              | 0.000722846    |
| Chr1              | 14242631     | 14245306   | 6                     | 2676              | 1.80E-07       |
| Chr1              | 14247868     | 14249348   | 6                     | 1481              | 1.22E-07       |
| Chr1              | 14320637     | 14320789   | 4                     | 153               | 1.36E-08       |
| Chr1              | 14325093     | 14325921   | 4                     | 829               | 2.41E-07       |
| Chr1              | 14498206     | 14498727   | 4                     | 522               | 1.99E-07       |
| Chr1              | 14542984     | 14544176   | 4                     | 1193              | 1.73E-07       |
| Chr1              | 14582820     | 14584698   | 6                     | 1879              | 5.74E-09       |
| Chr1              | 14715836     | 14717015   | 4                     | 1180              | 2.33744E-06    |
| Chr1              | 15154572     | 15156544   | 6                     | 1973              | 5.92E-09       |
| Chr1              | 15180791     | 15182731   | 7                     | 1941              | 3.21E-12       |
| Chr1              | 15496702     | 15498322   | 4                     | 1621              | 9.95E-08       |
| Chr1              | 15503769     | 15505408   | 6                     | 1640              | 4.14351E-06    |
| Chr1              | 15515692     | 15518601   | 5                     | 2910              | 1.24E-07       |
| Chr1              | 15611572     | 15613299   | 4                     | 1728              | 2.85422E-06    |
| Chr1              | 15671920     | 15672462   | 4                     | 543               | 1.81139E-05    |
| Chr1              | 15711135     | 15712770   | 5                     | 1636              | 3.93715E-06    |
| Chr1              | 15766249     | 15767392   | 4                     | 1144              | 0.000223252    |
| Chr1              | 15874926     | 15876555   | 4                     | 1630              | 2.85E-09       |

|      |          |          |   |      |             |
|------|----------|----------|---|------|-------------|
| Chr1 | 16015386 | 16017948 | 5 | 2563 | 2.30246E-05 |
| Chr1 | 16094413 | 16098359 | 7 | 3947 | 4.79E-10    |
| Chr1 | 16111179 | 16111315 | 4 | 137  | 0.000345396 |
| Chr1 | 16117487 | 16118626 | 4 | 1140 | 1.63E-07    |
| Chr1 | 16122308 | 16124581 | 6 | 2274 | 1.55E-09    |
| Chr1 | 16312030 | 16314312 | 4 | 2283 | 1.54717E-05 |
| Chr1 | 16318233 | 16319247 | 5 | 1015 | 2.1877E-06  |
| Chr1 | 16509935 | 16513548 | 7 | 3614 | 3.04E-09    |
| Chr1 | 16517771 | 16519743 | 5 | 1973 | 1.93539E-05 |
| Chr1 | 16630181 | 16630982 | 4 | 802  | 4.12E-07    |
| Chr1 | 16634524 | 16636234 | 4 | 1711 | 9.76766E-06 |
| Chr1 | 16680017 | 16681141 | 4 | 1125 | 2.86563E-06 |
| Chr1 | 17027821 | 17030201 | 6 | 2381 | 1.28E-08    |
| Chr1 | 17255440 | 17257122 | 6 | 1683 | 3.48E-07    |
| Chr1 | 19424903 | 19424931 | 4 | 29   | 3.48E-07    |
| Chr1 | 19887137 | 19887261 | 4 | 125  | 1.16E-10    |
| Chr1 | 20314728 | 20315215 | 4 | 488  | 2.37703E-05 |
| Chr1 | 26343557 | 26343851 | 4 | 295  | 7.20368E-06 |
| Chr1 | 27635711 | 27636487 | 5 | 777  | 1.38E-08    |
| Chr2 | 9710     | 11137    | 8 | 1428 | 4.48E-12    |
| Chr2 | 373581   | 374783   | 5 | 1203 | 3.13257E-06 |
| Chr2 | 375880   | 376421   | 4 | 542  | 3.62E-07    |
| Chr2 | 2398334  | 2400356  | 4 | 2023 | 4.3746E-06  |
| Chr2 | 2468132  | 2469483  | 5 | 1352 | 6.43E-07    |
| Chr2 | 2622773  | 2623308  | 4 | 536  | 1.54659E-05 |
| Chr2 | 2676874  | 2681341  | 8 | 4468 | 2.18E-08    |
| Chr2 | 2825402  | 2826896  | 4 | 1495 | 9.71353E-05 |
| Chr2 | 2878536  | 2879443  | 4 | 908  | 1.72986E-05 |
| Chr2 | 3076557  | 3077625  | 4 | 1069 | 1.22445E-06 |
| Chr2 | 3082631  | 3083445  | 5 | 815  | 7.59E-10    |
| Chr2 | 3098846  | 3100459  | 4 | 1614 | 8.47E-07    |
| Chr2 | 3230953  | 3232313  | 4 | 1361 | 7.41E-07    |
| Chr2 | 3550698  | 3551941  | 5 | 1244 | 2.56E-07    |
| Chr2 | 3615456  | 3616749  | 4 | 1294 | 0.000847242 |
| Chr2 | 3620562  | 3621415  | 4 | 854  | 0.001578697 |
| Chr2 | 3640357  | 3640899  | 4 | 543  | 8.30078E-07 |
| Chr2 | 3643196  | 3644541  | 5 | 1346 | 1.21E-07    |
| Chr2 | 3681282  | 3681637  | 4 | 356  | 1.41972E-05 |
| Chr2 | 3821866  | 3823286  | 4 | 1421 | 2.99321E-05 |
| Chr2 | 3858690  | 3861695  | 7 | 3006 | 5.86E-09    |
| Chr2 | 3879915  | 3881098  | 4 | 1184 | 5.11E-08    |
| Chr2 | 3888237  | 3889355  | 5 | 1119 | 3.22E-08    |
| Chr2 | 3905312  | 3907080  | 4 | 1769 | 3.72839E-06 |
| Chr2 | 3920285  | 3921904  | 4 | 1620 | 4.66507E-05 |
| Chr2 | 3951608  | 3952717  | 5 | 1110 | 4.41017E-05 |
| Chr2 | 4125238  | 4126316  | 4 | 1079 | 2.02636E-06 |
| Chr2 | 4171250  | 4172646  | 5 | 1397 | 4.44E-07    |
| Chr2 | 4238706  | 4240524  | 4 | 1819 | 3.01129E-06 |
| Chr2 | 4256951  | 4259718  | 7 | 2768 | 2.47E-12    |
| Chr2 | 4289962  | 4290789  | 5 | 828  | 2.50311E-05 |
| Chr2 | 4368819  | 4370764  | 5 | 1946 | 1.49E-08    |
| Chr2 | 4563469  | 4564337  | 4 | 869  | 2.15457E-06 |
| Chr2 | 4712622  | 4713106  | 4 | 485  | 0.000367025 |
| Chr2 | 4952271  | 4953520  | 4 | 1250 | 1.37225E-05 |
| Chr2 | 4974800  | 4976556  | 4 | 1757 | 6.36024E-06 |
| Chr2 | 4981688  | 4984385  | 4 | 2698 | 1.50E-07    |
| Chr2 | 5100300  | 5101886  | 4 | 1587 | 1.10E-07    |
| Chr2 | 5135613  | 5137794  | 6 | 2182 | 3.31E-09    |
| Chr2 | 5332615  | 5334406  | 7 | 1792 | 3.81E-07    |
| Chr2 | 5352914  | 5353428  | 4 | 515  | 2.30925E-06 |
| Chr2 | 5369389  | 5370413  | 4 | 1025 | 2.34933E-05 |
| Chr2 | 5563534  | 5565524  | 4 | 1991 | 9.00527E-05 |
| Chr2 | 5598865  | 5600373  | 6 | 1509 | 1.29E-08    |

|      |          |          |    |      |             |
|------|----------|----------|----|------|-------------|
| Chr2 | 5616418  | 5617786  | 4  | 1369 | 1.91382E-06 |
| Chr2 | 5797492  | 5800115  | 4  | 2624 | 4.56756E-06 |
| Chr2 | 5893173  | 5895370  | 6  | 2198 | 2.42E-10    |
| Chr2 | 6027657  | 6029013  | 4  | 1357 | 3.01E-07    |
| Chr2 | 6266095  | 6268053  | 4  | 1959 | 5.51186E-06 |
| Chr2 | 6343268  | 6343788  | 4  | 521  | 3.50245E-05 |
| Chr2 | 6435708  | 6436459  | 4  | 752  | 4.35E-08    |
| Chr2 | 6507670  | 6509573  | 6  | 1904 | 1.24E-10    |
| Chr2 | 6788837  | 6789342  | 4  | 506  | 2.41272E-06 |
| Chr2 | 6837495  | 6838423  | 5  | 929  | 5.81E-07    |
| Chr2 | 7225041  | 7226925  | 5  | 1885 | 4.68868E-06 |
| Chr2 | 8818263  | 8820142  | 4  | 1880 | 1.88305E-05 |
| Chr2 | 8995532  | 8995881  | 4  | 350  | 5.60E-07    |
| Chr2 | 9188372  | 9190402  | 4  | 2031 | 1.99306E-06 |
| Chr2 | 10604385 | 10605493 | 5  | 1109 | 2.48148E-05 |
| Chr2 | 10814594 | 10815192 | 7  | 599  | 4.75E-09    |
| Chr2 | 13223271 | 13224544 | 6  | 1274 | 1.36E-07    |
| Chr2 | 15405297 | 15405909 | 6  | 613  | 2.00E-14    |
| Chr2 | 15411378 | 15411631 | 4  | 254  | 2.76E-08    |
| Chr2 | 17337752 | 17338225 | 5  | 474  | 6.82229E-06 |
| Chr3 | 1555774  | 1558761  | 6  | 2988 | 4.15E-09    |
| Chr3 | 1963676  | 1964604  | 5  | 929  | 4.04E-08    |
| Chr3 | 1968901  | 1970421  | 9  | 1521 | 2.94E-14    |
| Chr3 | 3809823  | 3810727  | 5  | 905  | 1.61E-08    |
| Chr3 | 9785746  | 9786581  | 4  | 836  | 6.53E-08    |
| Chr3 | 10106549 | 10107771 | 4  | 1223 | 1.9567E-05  |
| Chr3 | 10634531 | 10634629 | 4  | 99   | 1.6123E-05  |
| Chr3 | 10920102 | 10921079 | 4  | 978  | 1.3536E-05  |
| Chr3 | 10970598 | 10972984 | 5  | 2387 | 0.000668079 |
| Chr3 | 11145014 | 11147236 | 5  | 2223 | 3.80E-08    |
| Chr3 | 11492242 | 11493109 | 6  | 868  | 8.28675E-07 |
| Chr3 | 11681017 | 11682434 | 5  | 1418 | 9.36E-08    |
| Chr3 | 11874636 | 11876793 | 5  | 2158 | 1.62E-08    |
| Chr3 | 12102494 | 12103667 | 5  | 1174 | 4.38E-08    |
| Chr3 | 12195295 | 12197961 | 6  | 2667 | 9.84E-09    |
| Chr3 | 12203088 | 12203668 | 4  | 581  | 1.13176E-05 |
| Chr3 | 12205213 | 12207293 | 9  | 2081 | 1.80E-10    |
| Chr3 | 12220600 | 12222265 | 4  | 1666 | 3.48E-07    |
| Chr3 | 12291294 | 12292280 | 4  | 987  | 2.44694E-05 |
| Chr3 | 12402781 | 12403477 | 5  | 697  | 7.98185E-06 |
| Chr3 | 12441569 | 12442897 | 5  | 1329 | 2.42436E-05 |
| Chr3 | 12463427 | 12465030 | 6  | 1604 | 8.81697E-06 |
| Chr3 | 12525880 | 12526882 | 4  | 1003 | 9.87559E-05 |
| Chr3 | 12533700 | 12535025 | 6  | 1326 | 7.69E-10    |
| Chr3 | 12556044 | 12557202 | 4  | 1159 | 9.33108E-06 |
| Chr3 | 12723521 | 12724325 | 4  | 805  | 1.38829E-05 |
| Chr3 | 12965819 | 12966912 | 11 | 1094 | 3.53E-12    |
| Chr3 | 13169542 | 13170553 | 4  | 1012 | 0.000567459 |
| Chr3 | 13362750 | 13366521 | 8  | 3772 | 1.90E-10    |
| Chr3 | 13467978 | 13469133 | 6  | 1156 | 1.31E-07    |
| Chr3 | 13515836 | 13517420 | 6  | 1585 | 4.05E-08    |
| Chr3 | 13636486 | 13639538 | 7  | 3053 | 7.92E-13    |
| Chr3 | 13706114 | 13707200 | 9  | 1087 | 2.77E-16    |
| Chr3 | 13709806 | 13711098 | 6  | 1293 | 2.90205E-06 |
| Chr3 | 13714104 | 13714669 | 4  | 566  | 5.62077E-06 |
| Chr3 | 13813953 | 13815886 | 4  | 1934 | 0.001005696 |
| Chr3 | 13826921 | 13828121 | 4  | 1201 | 1.14E-07    |
| Chr3 | 13831010 | 13833248 | 4  | 2239 | 2.40144E-05 |
| Chr3 | 13865830 | 13866789 | 4  | 960  | 5.51298E-05 |
| Chr3 | 13881037 | 13882169 | 4  | 1133 | 0.003462901 |
| Chr3 | 14078489 | 14080462 | 5  | 1974 | 5.26E-07    |
| Chr3 | 14151822 | 14153315 | 5  | 1494 | 6.13E-08    |
| Chr3 | 14172711 | 14173291 | 5  | 581  | 9.65065E-05 |

|      |          |          |    |      |             |
|------|----------|----------|----|------|-------------|
| Chr3 | 14185764 | 14187177 | 8  | 1414 | 6.61E-09    |
| Chr3 | 14190824 | 14190914 | 4  | 91   | 7.00E-07    |
| Chr3 | 14205692 | 14208913 | 11 | 3222 | 1.72E-11    |
| Chr3 | 14211248 | 14215110 | 11 | 3863 | 1.67E-09    |
| Chr3 | 14357741 | 14359201 | 4  | 1461 | 4.25895E-06 |
| Chr3 | 14410129 | 14411621 | 4  | 1493 | 1.48619E-05 |
| Chr3 | 14420451 | 14420963 | 4  | 513  | 1.58316E-05 |
| Chr3 | 14426722 | 14428060 | 5  | 1339 | 6.43E-08    |
| Chr3 | 14557000 | 14558052 | 4  | 1053 | 4.72603E-05 |
| Chr3 | 14579204 | 14579494 | 4  | 291  | 3.99307E-06 |
| Chr3 | 14769734 | 14771373 | 4  | 1640 | 2.93915E-06 |
| Chr3 | 14846753 | 14848435 | 4  | 1683 | 1.92937E-06 |
| Chr3 | 14862393 | 14863185 | 5  | 793  | 1.09548E-05 |
| Chr3 | 15114733 | 15117220 | 5  | 2488 | 2.01E-09    |
| Chr3 | 15119701 | 15121368 | 7  | 1668 | 1.12E-13    |
| Chr3 | 15134379 | 15135430 | 4  | 1052 | 0.00221785  |
| Chr3 | 15153760 | 15155590 | 4  | 1831 | 8.18E-08    |
| Chr3 | 15251098 | 15252931 | 4  | 1834 | 1.63519E-06 |
| Chr3 | 15305405 | 15306457 | 6  | 1053 | 3.44E-08    |
| Chr3 | 15330054 | 15331418 | 9  | 1365 | 1.11E-11    |
| Chr3 | 15443691 | 15445506 | 6  | 1816 | 4.79E-07    |
| Chr3 | 15496998 | 15497769 | 5  | 772  | 2.07491E-06 |
| Chr3 | 15581640 | 15582182 | 4  | 543  | 1.31193E-06 |
| Chr3 | 15719135 | 15720282 | 4  | 1148 | 2.58571E-05 |
| Chr3 | 15963412 | 15964267 | 4  | 856  | 4.15908E-06 |
| Chr3 | 15998931 | 15999516 | 4  | 586  | 3.92E-07    |
| Chr3 | 16437687 | 16438622 | 4  | 936  | 8.98E-07    |
| Chr3 | 16640190 | 16640910 | 4  | 721  | 7.76702E-06 |
| Chr3 | 16809536 | 16810827 | 5  | 1292 | 7.07E-07    |
| Chr3 | 16812289 | 16813768 | 6  | 1480 | 1.91E-08    |
| Chr3 | 16957477 | 16960445 | 6  | 2969 | 1.36E-08    |
| Chr3 | 17472718 | 17472785 | 4  | 68   | 6.35E-09    |
| Chr3 | 18793023 | 18794690 | 5  | 1668 | 1.45099E-06 |
| Chr3 | 22232642 | 22233732 | 4  | 1091 | 6.0564E-05  |
| Chr3 | 23108942 | 23110173 | 5  | 1232 | 9.78E-08    |
| Chr4 | 226396   | 226550   | 4  | 155  | 3.55E-09    |
| Chr4 | 330736   | 331272   | 4  | 537  | 0.000503862 |
| Chr4 | 1230859  | 1230879  | 4  | 21   | 4.46E-09    |
| Chr4 | 1694171  | 1696023  | 4  | 1853 | 8.82956E-05 |
| Chr4 | 1763473  | 1765492  | 5  | 2020 | 7.99E-08    |
| Chr4 | 1812283  | 1812948  | 5  | 666  | 4.14E-08    |
| Chr4 | 1986512  | 1988789  | 5  | 2278 | 8.94E-09    |
| Chr4 | 2013487  | 2014736  | 4  | 1250 | 8.76E-08    |
| Chr4 | 2141084  | 2141929  | 4  | 846  | 8.00886E-07 |
| Chr4 | 2197566  | 2199298  | 4  | 1733 | 5.37438E-06 |
| Chr4 | 2202129  | 2202849  | 4  | 721  | 0.000219421 |
| Chr4 | 2284887  | 2287724  | 6  | 2838 | 1.80E-09    |
| Chr4 | 2353758  | 2354955  | 4  | 1198 | 0.000148306 |
| Chr4 | 2834722  | 2835561  | 4  | 840  | 0.000231095 |
| Chr4 | 2854256  | 2855894  | 4  | 1639 | 3.08284E-05 |
| Chr4 | 3016930  | 3018323  | 4  | 1394 | 4.71E-08    |
| Chr4 | 3030585  | 3032193  | 4  | 1609 | 2.62053E-05 |
| Chr4 | 3040767  | 3042287  | 4  | 1521 | 0.000110302 |
| Chr4 | 3054479  | 3056242  | 9  | 1764 | 8.20405E-06 |
| Chr4 | 3139805  | 3140480  | 4  | 676  | 1.85E-07    |
| Chr4 | 3180691  | 3182755  | 5  | 2065 | 5.95E-08    |
| Chr4 | 3187405  | 3188530  | 4  | 1126 | 3.6706E-06  |
| Chr4 | 3224031  | 3225274  | 4  | 1244 | 6.45055E-07 |
| Chr4 | 3494225  | 3495308  | 4  | 1084 | 7.85662E-06 |
| Chr4 | 3538726  | 3540074  | 5  | 1349 | 1.72E-07    |
| Chr4 | 3554175  | 3555009  | 4  | 835  | 5.31825E-06 |
| Chr4 | 3566215  | 3567449  | 5  | 1235 | 7.49E-10    |
| Chr4 | 3691942  | 3693729  | 8  | 1788 | 6.30E-10    |

|      |          |          |    |      |             |
|------|----------|----------|----|------|-------------|
| Chr4 | 3740951  | 3743125  | 5  | 2175 | 0.00010464  |
| Chr4 | 3776872  | 3779244  | 5  | 2373 | 8.54974E-07 |
| Chr4 | 3795778  | 3796935  | 4  | 1158 | 6.73E-08    |
| Chr4 | 3846379  | 3846560  | 4  | 182  | 3.80827E-05 |
| Chr4 | 3849459  | 3850723  | 4  | 1265 | 1.18556E-05 |
| Chr4 | 3871695  | 3872309  | 4  | 615  | 0.000842282 |
| Chr4 | 3911709  | 3913591  | 4  | 1883 | 3.66228E-05 |
| Chr4 | 3927341  | 3929869  | 6  | 2529 | 1.54E-09    |
| Chr4 | 3954031  | 3955233  | 5  | 1203 | 1.13128E-05 |
| Chr4 | 3963594  | 3966798  | 6  | 3205 | 2.96755E-05 |
| Chr4 | 3968069  | 3969249  | 5  | 1181 | 0.000171015 |
| Chr4 | 3974079  | 3975065  | 5  | 987  | 2.20E-09    |
| Chr4 | 3979281  | 3980385  | 4  | 1105 | 6.41991E-05 |
| Chr4 | 3994607  | 3996253  | 5  | 1647 | 3.43163E-05 |
| Chr4 | 4110581  | 4112485  | 4  | 1905 | 7.43696E-05 |
| Chr4 | 4181506  | 4184017  | 6  | 2512 | 5.42E-09    |
| Chr4 | 4212106  | 4213228  | 4  | 1123 | 1.83476E-06 |
| Chr4 | 4214388  | 4215291  | 4  | 904  | 4.64E-07    |
| Chr4 | 4306993  | 4307669  | 5  | 677  | 2.50924E-06 |
| Chr4 | 4348640  | 4350322  | 4  | 1683 | 0.000222957 |
| Chr4 | 4427710  | 4428179  | 4  | 470  | 3.17048E-05 |
| Chr4 | 4437840  | 4441795  | 8  | 3956 | 1.11E-08    |
| Chr4 | 4601235  | 4601659  | 5  | 425  | 3.93E-07    |
| Chr4 | 4753773  | 4755583  | 4  | 1811 | 6.82527E-06 |
| Chr4 | 4763049  | 4763976  | 5  | 928  | 4.73E-09    |
| Chr4 | 4770093  | 4771546  | 4  | 1454 | 1.466E-06   |
| Chr4 | 5044201  | 5044360  | 4  | 160  | 5.32901E-05 |
| Chr4 | 5062279  | 5063786  | 6  | 1508 | 1.77E-10    |
| Chr4 | 5065053  | 5065845  | 5  | 793  | 4.04E-10    |
| Chr4 | 5069017  | 5070078  | 4  | 1062 | 1.23946E-06 |
| Chr4 | 5081271  | 5083125  | 6  | 1855 | 2.67E-08    |
| Chr4 | 5116472  | 5117731  | 4  | 1260 | 1.00642E-05 |
| Chr4 | 5489575  | 5490542  | 5  | 968  | 2.73E-08    |
| Chr4 | 5534279  | 5536150  | 5  | 1872 | 1.53E-07    |
| Chr4 | 5955409  | 5957803  | 5  | 2395 | 3.24001E-05 |
| Chr4 | 6726826  | 6729006  | 6  | 2181 | 1.37E-09    |
| Chr4 | 6919275  | 6919832  | 4  | 558  | 5.62169E-05 |
| Chr4 | 10993608 | 10995061 | 5  | 1454 | 2.65613E-05 |
| Chr4 | 11036787 | 11038308 | 4  | 1522 | 0.000659936 |
| Chr4 | 14146220 | 14146674 | 5  | 455  | 9.23E-09    |
| Chr5 | 2394285  | 2395916  | 5  | 1632 | 2.13322E-05 |
| Chr5 | 2401826  | 2402038  | 4  | 213  | 2.98484E-06 |
| Chr5 | 3899070  | 3900107  | 4  | 1038 | 2.87E-07    |
| Chr5 | 9093207  | 9094448  | 5  | 1242 | 9.89E-07    |
| Chr5 | 10736158 | 10737449 | 5  | 1292 | 6.69E-07    |
| Chr5 | 10838180 | 10839291 | 4  | 1112 | 1.57803E-06 |
| Chr5 | 10887172 | 10891040 | 10 | 3869 | 7.82E-14    |
| Chr5 | 10994325 | 10995144 | 4  | 820  | 9.70091E-05 |
| Chr5 | 11161317 | 11162778 | 7  | 1462 | 1.26E-07    |
| Chr5 | 11184699 | 11188654 | 16 | 3956 | 7.66E-08    |
| Chr5 | 11206908 | 11209387 | 8  | 2480 | 3.43E-10    |
| Chr5 | 11343565 | 11344646 | 4  | 1082 | 9.40766E-06 |
| Chr5 | 11363320 | 11365816 | 6  | 2497 | 1.32E-07    |
| Chr5 | 11429226 | 11430862 | 5  | 1637 | 6.03E-08    |
| Chr5 | 11460646 | 11462462 | 6  | 1817 | 3.83E-10    |
| Chr5 | 11472747 | 11473618 | 4  | 872  | 3.63967E-06 |
| Chr5 | 11474715 | 11475787 | 4  | 1073 | 4.67E-07    |
| Chr5 | 11508428 | 11509886 | 5  | 1459 | 6.63E-10    |
| Chr5 | 11590735 | 11591605 | 4  | 871  | 2.12E-08    |
| Chr5 | 11642192 | 11644701 | 5  | 2510 | 1.57665E-06 |
| Chr5 | 11649220 | 11650642 | 5  | 1423 | 3.01164E-06 |
| Chr5 | 11700106 | 11700631 | 4  | 526  | 3.4119E-06  |
| Chr5 | 11702274 | 11702862 | 4  | 589  | 0.004682368 |

|      |          |          |    |      |             |
|------|----------|----------|----|------|-------------|
| Chr5 | 11727723 | 11728774 | 4  | 1052 | 0.000726177 |
| Chr5 | 11737004 | 11738183 | 4  | 1180 | 1.2583E-05  |
| Chr5 | 11751709 | 11753285 | 6  | 1577 | 7.84E-07    |
| Chr5 | 11783237 | 11784749 | 4  | 1513 | 4.50206E-06 |
| Chr5 | 11937662 | 11939508 | 10 | 1847 | 1.02E-10    |
| Chr5 | 11941041 | 11942247 | 4  | 1207 | 0.002540336 |
| Chr5 | 12009302 | 12011390 | 8  | 2089 | 2.55E-07    |
| Chr5 | 12014020 | 12015107 | 4  | 1088 | 1.17702E-05 |
| Chr5 | 12022550 | 12024538 | 6  | 1989 | 2.77E-08    |
| Chr5 | 12028884 | 12030013 | 5  | 1130 | 1.38E-07    |
| Chr5 | 12039331 | 12039966 | 4  | 636  | 0.000160615 |
| Chr5 | 12051498 | 12052567 | 4  | 1070 | 8.06817E-06 |
| Chr5 | 12109205 | 12110103 | 4  | 899  | 1.03536E-05 |
| Chr5 | 12118934 | 12121101 | 4  | 2168 | 3.13E-07    |
| Chr5 | 12153060 | 12155297 | 7  | 2238 | 7.18E-11    |
| Chr5 | 12190091 | 12191964 | 4  | 1874 | 2.69E-07    |
| Chr5 | 12234617 | 12235366 | 4  | 750  | 4.65E-07    |
| Chr5 | 12317554 | 12318773 | 4  | 1220 | 3.4131E-06  |
| Chr5 | 12326280 | 12328754 | 5  | 2475 | 1.12E-08    |
| Chr5 | 12403796 | 12404738 | 4  | 943  | 6.38534E-06 |
| Chr5 | 12458576 | 12462732 | 7  | 4157 | 1.92E-09    |
| Chr5 | 12473705 | 12474448 | 4  | 744  | 4.25E-07    |
| Chr5 | 12502530 | 12503764 | 4  | 1235 | 6.551E-06   |
| Chr5 | 12528981 | 12530193 | 4  | 1213 | 0.000371285 |
| Chr5 | 12572168 | 12574273 | 6  | 2106 | 1.35E-07    |
| Chr5 | 12641714 | 12643040 | 4  | 1327 | 3.12682E-05 |
| Chr5 | 12762824 | 12763852 | 4  | 1029 | 2.35E-08    |
| Chr5 | 12946730 | 12948182 | 4  | 1453 | 3.03445E-06 |
| Chr5 | 12951796 | 12953234 | 4  | 1439 | 3.40E-07    |
| Chr5 | 12954318 | 12955721 | 4  | 1404 | 9.82464E-06 |
| Chr5 | 12998507 | 13001032 | 7  | 2526 | 2.96E-09    |
| Chr5 | 13002467 | 13004082 | 4  | 1616 | 6.50191E-06 |
| Chr5 | 13023428 | 13025611 | 4  | 2184 | 1.40864E-05 |
| Chr5 | 13122094 | 13123205 | 4  | 1112 | 1.94E-07    |
| Chr5 | 13135266 | 13136452 | 4  | 1187 | 2.34E-07    |
| Chr5 | 13185417 | 13186387 | 4  | 971  | 4.05887E-05 |
| Chr5 | 13259458 | 13261200 | 7  | 1743 | 2.00E-09    |
| Chr5 | 13296920 | 13298102 | 4  | 1183 | 2.23198E-06 |
| Chr5 | 13324903 | 13325962 | 4  | 1060 | 4.32E-08    |
| Chr5 | 13398671 | 13401907 | 7  | 3237 | 1.28E-08    |
| Chr5 | 13529325 | 13530897 | 6  | 1573 | 1.10916E-08 |
| Chr5 | 13966378 | 13967874 | 5  | 1497 | 1.96E-08    |
| Chr5 | 14172970 | 14174010 | 4  | 1041 | 2.50013E-05 |
| Chr5 | 15354515 | 15355887 | 4  | 1373 | 8.89998E-06 |
| Chr5 | 15561859 | 15562091 | 8  | 233  | 2.33E-13    |
| Chr5 | 15841031 | 15841196 | 4  | 166  | 2.4573E-06  |
| Chr5 | 16470846 | 16471462 | 4  | 617  | 2.44985E-06 |
| Chr5 | 16702892 | 16704623 | 5  | 1732 | 4.41465E-07 |
| Chr5 | 18196366 | 18197835 | 5  | 1470 | 4.64E-08    |
| Chr5 | 19891228 | 19892180 | 5  | 953  | 1.34233E-06 |
| Chr5 | 21167611 | 21168442 | 4  | 832  | 1.55044E-05 |

**-Pit Root 7dat (Hyper-DMRs)**

| Chromosome | Start   | End     | number of DMCs | DMR lenght | P-value     |
|------------|---------|---------|----------------|------------|-------------|
| Chr1       | 5694500 | 5695522 | 5              | 1023       | 1.63554E-06 |
| Chr1       | 6590349 | 6591039 | 5              | 691        | 7.38E-07    |
| Chr1       | 7069397 | 7069777 | 4              | 381        | 1.28222E-06 |
| Chr1       | 7353322 | 7355168 | 9              | 1847       | 1.01E-07    |
| Chr1       | 7358200 | 7365105 | 25             | 6906       | 6.33E-21    |
| Chr1       | 8731206 | 8732783 | 6              | 1578       | 2.57E-09    |
| Chr1       | 8928203 | 8930006 | 5              | 1804       | 4.15E-08    |
| Chr1       | 9371307 | 9372664 | 4              | 1358       | 0.000232174 |



|      |          |          |    |      |             |
|------|----------|----------|----|------|-------------|
| Chr1 | 9678242  | 9679633  | 5  | 1392 | 3.02532E-06 |
| Chr1 | 13005187 | 13006465 | 4  | 1279 | 3.90464E-05 |
| Chr1 | 13099961 | 13101629 | 4  | 1669 | 2.07059E-05 |
| Chr1 | 13299251 | 13299993 | 4  | 743  | 3.35912E-07 |
| Chr1 | 13328799 | 13330714 | 7  | 1916 | 1.15E-09    |
| Chr1 | 13335202 | 13336520 | 4  | 1319 | 2.62E-07    |
| Chr1 | 13391839 | 13393325 | 4  | 1487 | 3.05768E-06 |
| Chr1 | 13493078 | 13494473 | 4  | 1396 | 1.10822E-05 |
| Chr1 | 13652115 | 13653922 | 4  | 1808 | 4.13655E-06 |
| Chr1 | 13661124 | 13662559 | 6  | 1436 | 1.22E-07    |
| Chr1 | 13794104 | 13795567 | 5  | 1464 | 9.68314E-06 |
| Chr1 | 13828763 | 13831820 | 6  | 3058 | 1.51E-07    |
| Chr1 | 13862742 | 13863592 | 4  | 851  | 2.69853E-05 |
| Chr1 | 13884748 | 13885708 | 4  | 961  | 1.14553E-06 |
| Chr1 | 13924409 | 13925092 | 4  | 684  | 1.12698E-06 |
| Chr1 | 13942856 | 13944088 | 5  | 1233 | 1.55E-07    |
| Chr1 | 13948865 | 13949748 | 4  | 884  | 5.1178E-05  |
| Chr1 | 13956360 | 13957440 | 4  | 1081 | 1.90524E-06 |
| Chr1 | 14044951 | 14045914 | 4  | 964  | 0.000301473 |
| Chr1 | 14081655 | 14082144 | 4  | 490  | 0.000285338 |
| Chr1 | 14083264 | 14085747 | 4  | 2484 | 1.99877E-05 |
| Chr1 | 14105244 | 14105752 | 4  | 509  | 5.53926E-05 |
| Chr1 | 14183116 | 14183541 | 4  | 426  | 3.68283E-05 |
| Chr1 | 14189649 | 14190753 | 5  | 1105 | 0.001213201 |
| Chr1 | 14193656 | 14195245 | 4  | 1590 | 2.02852E-06 |
| Chr1 | 14199458 | 14202183 | 6  | 2726 | 4.27E-09    |
| Chr1 | 14221929 | 14223664 | 6  | 1736 | 7.07E-09    |
| Chr1 | 14229360 | 14231203 | 5  | 1844 | 1.48E-07    |
| Chr1 | 14233971 | 14236792 | 9  | 2822 | 1.50E-10    |
| Chr1 | 14241842 | 14243112 | 6  | 1271 | 7.05E-08    |
| Chr1 | 14253270 | 14254409 | 4  | 1140 | 1.58611E-05 |
| Chr1 | 14269329 | 14270183 | 6  | 855  | 1.55162E-06 |
| Chr1 | 14271393 | 14272487 | 4  | 1095 | 4.39E-07    |
| Chr1 | 14321437 | 14322807 | 5  | 1371 | 3.3022E-06  |
| Chr1 | 14334366 | 14335925 | 5  | 1560 | 5.7398E-06  |
| Chr1 | 14387385 | 14389465 | 6  | 2081 | 2.21E-07    |
| Chr1 | 14466739 | 14467154 | 4  | 416  | 0.00023684  |
| Chr1 | 14582344 | 14582615 | 4  | 272  | 4.82106E-06 |
| Chr1 | 14600759 | 14604031 | 9  | 3273 | 5.75E-10    |
| Chr1 | 14849454 | 14851195 | 7  | 1742 | 2.24E-10    |
| Chr1 | 15067271 | 15068324 | 7  | 1054 | 1.21E-08    |
| Chr1 | 15073101 | 15073626 | 5  | 526  | 8.46593E-06 |
| Chr1 | 15081492 | 15085829 | 30 | 4338 | 1.53E-27    |
| Chr1 | 15151078 | 15152573 | 4  | 1496 | 1.44406E-05 |
| Chr1 | 15156864 | 15158355 | 6  | 1492 | 1.94E-07    |
| Chr1 | 15200051 | 15201180 | 5  | 1130 | 1.76499E-05 |
| Chr1 | 15442312 | 15444207 | 4  | 1896 | 1.4715E-05  |
| Chr1 | 15464877 | 15465043 | 4  | 167  | 5.31781E-05 |
| Chr1 | 15500787 | 15501779 | 4  | 993  | 6.31E-09    |
| Chr1 | 15506338 | 15507693 | 6  | 1356 | 4.23E-09    |
| Chr1 | 15510196 | 15511551 | 4  | 1356 | 3.94E-07    |
| Chr1 | 15538187 | 15541750 | 10 | 3564 | 9.14E-14    |
| Chr1 | 15560880 | 15562219 | 4  | 1340 | 9.17311E-05 |
| Chr1 | 15573317 | 15575471 | 8  | 2155 | 9.33E-15    |
| Chr1 | 15639389 | 15640681 | 4  | 1293 | 2.48953E-06 |
| Chr1 | 15667252 | 15669102 | 5  | 1851 | 4.32E-09    |
| Chr1 | 15671023 | 15671626 | 4  | 604  | 5.77E-07    |
| Chr1 | 15687140 | 15688753 | 4  | 1614 | 3.13084E-05 |
| Chr1 | 15698954 | 15700145 | 5  | 1192 | 4.52915E-06 |
| Chr1 | 15712329 | 15715809 | 11 | 3481 | 7.36E-16    |
| Chr1 | 15738285 | 15739099 | 4  | 815  | 5.08766E-06 |
| Chr1 | 15956648 | 15958077 | 4  | 1430 | 2.98634E-06 |
| Chr1 | 16015804 | 16017868 | 5  | 2065 | 7.77734E-07 |

|      |          |          |     |       |             |
|------|----------|----------|-----|-------|-------------|
| Chr1 | 16094864 | 16097549 | 7   | 2686  | 3.62E-10    |
| Chr1 | 16102961 | 16105058 | 4   | 2098  | 4.59124E-06 |
| Chr1 | 16369874 | 16371755 | 5   | 1882  | 2.71898E-06 |
| Chr1 | 16391898 | 16392918 | 4   | 1021  | 1.29337E-05 |
| Chr1 | 16491491 | 16491818 | 4   | 328   | 5.77E-07    |
| Chr1 | 16513359 | 16514985 | 9   | 1627  | 4.44E-10    |
| Chr1 | 16523619 | 16524601 | 5   | 983   | 8.48E-08    |
| Chr1 | 16526521 | 16528402 | 5   | 1882  | 5.45E-08    |
| Chr1 | 16538829 | 16539336 | 4   | 508   | 3.92E-07    |
| Chr1 | 16626998 | 16628678 | 5   | 1681  | 4.90E-08    |
| Chr1 | 16635151 | 16636839 | 6   | 1689  | 8.70E-09    |
| Chr1 | 16694729 | 16695434 | 4   | 706   | 5.14113E-06 |
| Chr1 | 17027895 | 17029372 | 7   | 1478  | 4.02E-09    |
| Chr1 | 17036626 | 17039000 | 7   | 2375  | 1.31E-08    |
| Chr1 | 18002440 | 18003975 | 6   | 1536  | 1.59E-07    |
| Chr1 | 19336964 | 19337651 | 4   | 688   | 2.59792E-05 |
| Chr1 | 20085286 | 20088597 | 8   | 3312  | 4.57E-12    |
| Chr1 | 20709996 | 20710643 | 5   | 648   | 1.96E-07    |
| Chr1 | 21747900 | 21750374 | 7   | 2475  | 2.98E-09    |
| Chr1 | 21751552 | 21752647 | 7   | 1096  | 3.97E-10    |
| Chr1 | 24273579 | 24275839 | 39  | 2261  | 4.30E-50    |
| Chr1 | 26366858 | 26368261 | 4   | 1404  | 2.29E-08    |
| Chr2 | 1247     | 3743     | 87  | 2497  | 1.48E-174   |
| Chr2 | 5552     | 5915     | 7   | 364   | 5.54E-07    |
| Chr2 | 8552     | 12512    | 8   | 3961  | 0.000931465 |
| Chr2 | 17636    | 18621    | 5   | 986   | 7.35E-10    |
| Chr2 | 47098    | 47690    | 7   | 593   | 6.02E-08    |
| Chr2 | 303346   | 303396   | 5   | 51    | 5.72E-11    |
| Chr2 | 375999   | 377963   | 9   | 1965  | 5.89E-12    |
| Chr2 | 821730   | 822102   | 4   | 373   | 1.02227E-05 |
| Chr2 | 1784044  | 1786839  | 7   | 2796  | 5.96E-08    |
| Chr2 | 1907987  | 1909469  | 4   | 1483  | 3.24144E-05 |
| Chr2 | 1910589  | 1911759  | 4   | 1171  | 4.1679E-05  |
| Chr2 | 2079823  | 2080322  | 6   | 500   | 1.25552E-07 |
| Chr2 | 2202822  | 2205615  | 9   | 2794  | 5.28E-12    |
| Chr2 | 2377724  | 2381774  | 10  | 4051  | 3.07E-12    |
| Chr2 | 2392029  | 2394844  | 10  | 2816  | 1.79E-16    |
| Chr2 | 2401452  | 2404121  | 7   | 2670  | 1.44749E-06 |
| Chr2 | 2407004  | 2409049  | 6   | 2046  | 1.58631E-05 |
| Chr2 | 2448912  | 2449391  | 4   | 480   | 7.92943E-05 |
| Chr2 | 2450497  | 2452175  | 5   | 1679  | 1.24E-07    |
| Chr2 | 2466610  | 2467331  | 4   | 722   | 1.06138E-05 |
| Chr2 | 2505143  | 2506798  | 4   | 1656  | 3.78791E-06 |
| Chr2 | 2576951  | 2578930  | 4   | 1980  | 2.65739E-05 |
| Chr2 | 2644766  | 2645791  | 4   | 1026  | 4.44998E-06 |
| Chr2 | 2692064  | 2694955  | 5   | 2892  | 2.72589E-05 |
| Chr2 | 2707925  | 2708582  | 6   | 658   | 2.34E-07    |
| Chr2 | 2717674  | 2718486  | 4   | 813   | 0.000773636 |
| Chr2 | 2742122  | 2743321  | 4   | 1200  | 4.11488E-05 |
| Chr2 | 2746394  | 2747099  | 4   | 706   | 2.42442E-05 |
| Chr2 | 2856465  | 2857015  | 6   | 551   | 3.99E-09    |
| Chr2 | 3084132  | 3085576  | 5   | 1445  | 9.07E-07    |
| Chr2 | 3093456  | 3095017  | 6   | 1562  | 2.74E-09    |
| Chr2 | 3101408  | 3103870  | 7   | 2463  | 2.78E-10    |
| Chr2 | 3160728  | 3162188  | 4   | 1461  | 1.33032E-06 |
| Chr2 | 3226869  | 3228120  | 4   | 1252  | 1.04891E-05 |
| Chr2 | 3240687  | 3242048  | 21  | 1362  | 2.07E-20    |
| Chr2 | 3247282  | 3247952  | 13  | 671   | 1.44E-19    |
| Chr2 | 3249266  | 3253259  | 39  | 3994  | 9.34E-48    |
| Chr2 | 3254818  | 3259190  | 29  | 4373  | 1.46E-27    |
| Chr2 | 3260253  | 3263946  | 49  | 3694  | 3.07E-68    |
| Chr2 | 3265366  | 3280730  | 160 | 15365 | 1.56E-193   |
| Chr2 | 3282238  | 3283522  | 6   | 1285  | 1.03E-07    |

|      |         |         |     |       |             |
|------|---------|---------|-----|-------|-------------|
| Chr2 | 3285308 | 3306620 | 212 | 21313 | 7.93E-242   |
| Chr2 | 3307632 | 3338270 | 271 | 30639 | 2.97E-308   |
| Chr2 | 3339836 | 3344762 | 66  | 4927  | 8.86E-67    |
| Chr2 | 3346256 | 3352004 | 57  | 5749  | 3.16E-64    |
| Chr2 | 3353458 | 3355862 | 22  | 2405  | 8.15E-27    |
| Chr2 | 3356904 | 3359550 | 20  | 2647  | 3.21E-25    |
| Chr2 | 3360814 | 3367952 | 99  | 7139  | 1.53E-112   |
| Chr2 | 3377482 | 3379110 | 10  | 1629  | 6.53E-15    |
| Chr2 | 3393393 | 3393848 | 10  | 456   | 2.87E-13    |
| Chr2 | 3398749 | 3398880 | 11  | 132   | 1.50E-16    |
| Chr2 | 3431385 | 3431570 | 4   | 186   | 2.31614E-06 |
| Chr2 | 3455834 | 3455904 | 4   | 71    | 1.1508E-06  |
| Chr2 | 3459037 | 3461024 | 10  | 1988  | 9.80E-12    |
| Chr2 | 3485144 | 3486571 | 9   | 1428  | 1.49E-13    |
| Chr2 | 3487585 | 3489119 | 9   | 1535  | 2.30E-13    |
| Chr2 | 3490190 | 3490453 | 5   | 264   | 2.41E-07    |
| Chr2 | 3491597 | 3493336 | 14  | 1740  | 1.58E-19    |
| Chr2 | 3497893 | 3500110 | 8   | 2218  | 1.98E-10    |
| Chr2 | 3543017 | 3543786 | 5   | 770   | 3.13E-11    |
| Chr2 | 3548487 | 3550185 | 4   | 1699  | 1.6208E-06  |
| Chr2 | 3605740 | 3607297 | 14  | 1558  | 3.18E-08    |
| Chr2 | 3615021 | 3627437 | 86  | 12417 | 3.49E-78    |
| Chr2 | 3687348 | 3689525 | 5   | 2178  | 8.54E-10    |
| Chr2 | 3728437 | 3730241 | 5   | 1805  | 7.24E-07    |
| Chr2 | 3764978 | 3765549 | 4   | 572   | 1.08065E-06 |
| Chr2 | 3786566 | 3787241 | 5   | 676   | 1.05882E-06 |
| Chr2 | 3817148 | 3817209 | 4   | 62    | 8.71175E-06 |
| Chr2 | 3821818 | 3823175 | 4   | 1358  | 1.21559E-06 |
| Chr2 | 3881193 | 3883872 | 6   | 2680  | 4.86E-09    |
| Chr2 | 3886480 | 3887908 | 5   | 1429  | 3.18E-07    |
| Chr2 | 3905756 | 3907826 | 4   | 2071  | 1.14918E-05 |
| Chr2 | 3951451 | 3953104 | 11  | 1654  | 2.00E-12    |
| Chr2 | 3968177 | 3970190 | 7   | 2014  | 3.29E-07    |
| Chr2 | 4007571 | 4008529 | 6   | 959   | 2.23E-08    |
| Chr2 | 4010944 | 4012485 | 4   | 1542  | 4.32351E-05 |
| Chr2 | 4041984 | 4043057 | 4   | 1074  | 2.82724E-05 |
| Chr2 | 4051527 | 4052105 | 4   | 579   | 1.85567E-06 |
| Chr2 | 4054753 | 4055691 | 4   | 939   | 2.93317E-06 |
| Chr2 | 4090991 | 4093136 | 6   | 2146  | 1.51E-08    |
| Chr2 | 4129916 | 4130148 | 6   | 233   | 5.00E-09    |
| Chr2 | 4200905 | 4201994 | 4   | 1090  | 9.42E-08    |
| Chr2 | 4234049 | 4235049 | 4   | 1001  | 0.000112808 |
| Chr2 | 4238359 | 4241010 | 9   | 2652  | 2.38E-09    |
| Chr2 | 4504310 | 4505757 | 5   | 1448  | 1.50E-08    |
| Chr2 | 4519289 | 4520240 | 4   | 952   | 9.29611E-05 |
| Chr2 | 4627597 | 4629130 | 4   | 1534  | 3.31843E-06 |
| Chr2 | 4688149 | 4689565 | 6   | 1417  | 2.29E-07    |
| Chr2 | 4722411 | 4724105 | 5   | 1695  | 2.13671E-06 |
| Chr2 | 4728568 | 4729075 | 4   | 508   | 1.48064E-06 |
| Chr2 | 4734125 | 4736192 | 4   | 2068  | 9.19E-09    |
| Chr2 | 4808417 | 4809174 | 4   | 758   | 2.57627E-05 |
| Chr2 | 4813616 | 4817263 | 9   | 3648  | 5.40E-12    |
| Chr2 | 4844011 | 4844487 | 13  | 477   | 6.05E-19    |
| Chr2 | 4849542 | 4852578 | 7   | 3037  | 1.67E-09    |
| Chr2 | 4951972 | 4953408 | 5   | 1437  | 2.11E-08    |
| Chr2 | 4978562 | 4980670 | 4   | 2109  | 0.000522976 |
| Chr2 | 4983931 | 4987379 | 9   | 3449  | 2.01E-11    |
| Chr2 | 4990136 | 4991801 | 4   | 1666  | 8.20891E-06 |
| Chr2 | 5041248 | 5043432 | 5   | 2185  | 8.99E-07    |
| Chr2 | 5044774 | 5047711 | 7   | 2938  | 7.03E-08    |
| Chr2 | 5100872 | 5102680 | 6   | 1809  | 6.25E-08    |
| Chr2 | 5103728 | 5105024 | 6   | 1297  | 5.58E-11    |
| Chr2 | 5134905 | 5136629 | 4   | 1725  | 0.000194024 |

|      |          |          |    |      |             |
|------|----------|----------|----|------|-------------|
| Chr2 | 5253362  | 5254863  | 5  | 1502 | 2.25E-09    |
| Chr2 | 5277398  | 5279953  | 6  | 2556 | 1.58E-09    |
| Chr2 | 5280965  | 5282751  | 6  | 1787 | 1.12E-09    |
| Chr2 | 5287307  | 5289241  | 6  | 1935 | 4.55E-08    |
| Chr2 | 5301997  | 5303345  | 5  | 1349 | 4.42E-13    |
| Chr2 | 5310956  | 5311924  | 4  | 969  | 6.2175E-06  |
| Chr2 | 5334917  | 5336443  | 7  | 1527 | 1.47E-08    |
| Chr2 | 5369042  | 5370187  | 5  | 1146 | 2.10E-08    |
| Chr2 | 5377037  | 5378454  | 5  | 1418 | 2.48E-07    |
| Chr2 | 5379723  | 5380858  | 6  | 1136 | 3.70E-11    |
| Chr2 | 5384248  | 5385076  | 4  | 829  | 7.05E-08    |
| Chr2 | 5530430  | 5532246  | 6  | 1817 | 1.60553E-06 |
| Chr2 | 5566580  | 5567809  | 11 | 1230 | 9.78E-15    |
| Chr2 | 5573123  | 5575060  | 6  | 1938 | 5.25E-10    |
| Chr2 | 5579462  | 5580504  | 4  | 1043 | 3.66075E-06 |
| Chr2 | 5850238  | 5851309  | 4  | 1072 | 1.52905E-05 |
| Chr2 | 5984154  | 5985232  | 4  | 1079 | 1.83356E-06 |
| Chr2 | 6008464  | 6010382  | 4  | 1919 | 5.84E-10    |
| Chr2 | 6027881  | 6030044  | 6  | 2164 | 4.58E-07    |
| Chr2 | 6116290  | 6118558  | 7  | 2269 | 1.05E-07    |
| Chr2 | 6120246  | 6120291  | 5  | 46   | 2.01E-07    |
| Chr2 | 6462451  | 6463067  | 4  | 617  | 1.66884E-06 |
| Chr2 | 6555452  | 6557523  | 5  | 2072 | 7.44E-09    |
| Chr2 | 6702022  | 6703275  | 4  | 1254 | 1.2081E-06  |
| Chr2 | 6942884  | 6943449  | 5  | 566  | 5.71E-08    |
| Chr2 | 6975105  | 6975389  | 4  | 285  | 0.000130141 |
| Chr2 | 7009288  | 7011746  | 7  | 2459 | 1.36E-07    |
| Chr2 | 7173681  | 7175389  | 4  | 1709 | 0.000298909 |
| Chr2 | 7227279  | 7228161  | 5  | 883  | 5.96E-10    |
| Chr2 | 7778442  | 7780331  | 5  | 1890 | 1.05E-09    |
| Chr2 | 8819108  | 8820400  | 5  | 1293 | 7.54E-07    |
| Chr2 | 8911389  | 8911509  | 4  | 121  | 1.54E-08    |
| Chr2 | 9122904  | 9123922  | 5  | 1019 | 6.21E-08    |
| Chr2 | 9528992  | 9529356  | 4  | 365  | 2.15E-08    |
| Chr2 | 10408819 | 10409601 | 5  | 783  | 6.45E-10    |
| Chr2 | 11867364 | 11867899 | 4  | 536  | 4.11049E-06 |
| Chr2 | 17339210 | 17340084 | 6  | 875  | 1.32517E-05 |
| Chr2 | 18165845 | 18166069 | 5  | 225  | 9.24E-08    |
| Chr2 | 18651522 | 18653327 | 6  | 1806 | 1.77E-09    |
| Chr3 | 2810702  | 2813255  | 5  | 2554 | 5.42E-07    |
| Chr3 | 3664368  | 3664444  | 4  | 77   | 5.34E-07    |
| Chr3 | 7949389  | 7950126  | 5  | 738  | 9.08E-08    |
| Chr3 | 9185383  | 9187118  | 4  | 1736 | 1.0307E-06  |
| Chr3 | 9310344  | 9311902  | 4  | 1559 | 3.19E-07    |
| Chr3 | 9617771  | 9619606  | 5  | 1836 | 1.85E-08    |
| Chr3 | 9708245  | 9708578  | 4  | 334  | 4.54E-07    |
| Chr3 | 10110348 | 10111930 | 5  | 1583 | 7.2076E-06  |
| Chr3 | 10167298 | 10168340 | 4  | 1043 | 1.31383E-05 |
| Chr3 | 10339745 | 10341317 | 6  | 1573 | 1.87E-09    |
| Chr3 | 10478832 | 10479743 | 4  | 912  | 7.51E-07    |
| Chr3 | 10559175 | 10561317 | 5  | 2143 | 1.92E-08    |
| Chr3 | 11018200 | 11018750 | 4  | 551  | 3.11E-07    |
| Chr3 | 11059797 | 11060778 | 4  | 982  | 2.39442E-06 |
| Chr3 | 11065625 | 11066566 | 4  | 942  | 4.70418E-05 |
| Chr3 | 11330457 | 11331657 | 5  | 1201 | 3.54E-07    |
| Chr3 | 11356740 | 11357659 | 4  | 920  | 2.21801E-06 |
| Chr3 | 11416296 | 11417633 | 5  | 1338 | 4.98E-09    |
| Chr3 | 11548954 | 11550250 | 5  | 1297 | 2.28E-07    |
| Chr3 | 11575569 | 11576801 | 4  | 1233 | 0.000112206 |
| Chr3 | 11581957 | 11582658 | 4  | 702  | 2.15E-07    |
| Chr3 | 11632466 | 11633335 | 4  | 870  | 6.92948E-05 |
| Chr3 | 11636756 | 11637799 | 5  | 1044 | 1.40E-07    |
| Chr3 | 11721877 | 11721923 | 5  | 47   | 8.48E-12    |

|      |          |          |     |      |             |
|------|----------|----------|-----|------|-------------|
| Chr3 | 12037282 | 12040950 | 9   | 3669 | 2.97E-14    |
| Chr3 | 12051350 | 12052445 | 5   | 1096 | 3.52938E-06 |
| Chr3 | 12070657 | 12071801 | 4   | 1145 | 2.33653E-06 |
| Chr3 | 12178105 | 12180589 | 9   | 2485 | 4.14E-14    |
| Chr3 | 12192921 | 12194863 | 5   | 1943 | 2.73E-08    |
| Chr3 | 12202598 | 12204280 | 5   | 1683 | 1.43E-07    |
| Chr3 | 12209248 | 12210630 | 5   | 1383 | 8.78E-08    |
| Chr3 | 12251716 | 12253234 | 6   | 1519 | 1.05E-08    |
| Chr3 | 12283894 | 12284936 | 4   | 1043 | 1.67237E-05 |
| Chr3 | 12288531 | 12290146 | 5   | 1616 | 5.83339E-07 |
| Chr3 | 12324966 | 12326886 | 4   | 1921 | 1.22061E-06 |
| Chr3 | 12334807 | 12335488 | 4   | 682  | 4.27E-07    |
| Chr3 | 12382064 | 12384248 | 4   | 2185 | 5.297E-06   |
| Chr3 | 12402486 | 12403698 | 6   | 1213 | 4.49E-08    |
| Chr3 | 12427047 | 12428899 | 5   | 1853 | 1.22651E-06 |
| Chr3 | 12440082 | 12443293 | 7   | 3212 | 1.18E-09    |
| Chr3 | 12467786 | 12470723 | 7   | 2938 | 2.92E-10    |
| Chr3 | 12494402 | 12495161 | 4   | 760  | 4.80E-07    |
| Chr3 | 12499959 | 12502064 | 5   | 2106 | 2.36E-07    |
| Chr3 | 12532559 | 12534472 | 5   | 1914 | 1.41E-07    |
| Chr3 | 12679206 | 12680575 | 4   | 1370 | 0.00013369  |
| Chr3 | 13084897 | 13088388 | 10  | 3492 | 1.10E-11    |
| Chr3 | 13099028 | 13100760 | 4   | 1733 | 0.00023208  |
| Chr3 | 13113803 | 13115424 | 4   | 1622 | 9.37E-07    |
| Chr3 | 13144484 | 13144968 | 4   | 485  | 0.001051588 |
| Chr3 | 13246541 | 13248752 | 5   | 2212 | 4.32E-10    |
| Chr3 | 13285484 | 13286687 | 6   | 1204 | 8.29E-09    |
| Chr3 | 13408288 | 13410583 | 9   | 2296 | 6.99E-16    |
| Chr3 | 13468712 | 13470397 | 4   | 1686 | 6.19289E-06 |
| Chr3 | 13476492 | 13477793 | 4   | 1302 | 0.002753498 |
| Chr3 | 13547845 | 13550464 | 5   | 2620 | 1.35E-07    |
| Chr3 | 13574947 | 13577276 | 6   | 2330 | 9.60E-08    |
| Chr3 | 13580344 | 13582484 | 7   | 2141 | 1.06E-08    |
| Chr3 | 13586196 | 13587693 | 13  | 1498 | 6.12E-10    |
| Chr3 | 13588954 | 13592267 | 39  | 3314 | 8.01E-34    |
| Chr3 | 13608292 | 13611440 | 8   | 3149 | 1.55E-11    |
| Chr3 | 13625151 | 13626130 | 4   | 980  | 1.85019E-05 |
| Chr3 | 13636205 | 13637314 | 7   | 1110 | 1.74E-12    |
| Chr3 | 13663914 | 13667115 | 8   | 3202 | 1.87E-07    |
| Chr3 | 13675149 | 13676292 | 6   | 1144 | 5.52E-07    |
| Chr3 | 13712225 | 13712397 | 4   | 173  | 1.0535E-06  |
| Chr3 | 13813360 | 13814609 | 5   | 1250 | 3.29931E-06 |
| Chr3 | 13826502 | 13827885 | 7   | 1384 | 1.43E-08    |
| Chr3 | 13829266 | 13834644 | 15  | 5379 | 7.95E-16    |
| Chr3 | 13901794 | 13904565 | 5   | 2772 | 8.41E-09    |
| Chr3 | 13911109 | 13911839 | 4   | 731  | 3.71821E-06 |
| Chr3 | 13996822 | 13998620 | 5   | 1799 | 8.39E-08    |
| Chr3 | 13999772 | 14001583 | 9   | 1812 | 2.06E-12    |
| Chr3 | 14037536 | 14038798 | 5   | 1263 | 1.04E-07    |
| Chr3 | 14122003 | 14123093 | 5   | 1091 | 3.85E-08    |
| Chr3 | 14156827 | 14157095 | 4   | 269  | 1.14407E-06 |
| Chr3 | 14172047 | 14173296 | 7   | 1250 | 5.60018E-05 |
| Chr3 | 14180470 | 14181737 | 11  | 1268 | 1.22E-11    |
| Chr3 | 14190459 | 14190945 | 4   | 487  | 0.000240295 |
| Chr3 | 14195461 | 14203872 | 160 | 8412 | 2.08E-213   |
| Chr3 | 14207719 | 14208627 | 4   | 909  | 2.20458E-05 |
| Chr3 | 14212836 | 14213619 | 4   | 784  | 1.86042E-05 |
| Chr3 | 14217754 | 14218658 | 4   | 905  | 0.000273013 |
| Chr3 | 14221744 | 14222214 | 5   | 471  | 1.65865E-06 |
| Chr3 | 14254732 | 14256239 | 4   | 1508 | 1.12685E-06 |
| Chr3 | 14257468 | 14259589 | 4   | 2122 | 4.66E-07    |
| Chr3 | 14344012 | 14344087 | 4   | 76   | 2.33713E-06 |
| Chr3 | 14374337 | 14375237 | 4   | 901  | 2.25276E-06 |

|      |          |          |    |      |             |
|------|----------|----------|----|------|-------------|
| Chr3 | 14410493 | 14411160 | 4  | 668  | 1.02977E-06 |
| Chr3 | 14434199 | 14436751 | 5  | 2553 | 1.54367E-06 |
| Chr3 | 14548914 | 14550517 | 7  | 1604 | 7.75196E-06 |
| Chr3 | 14552245 | 14553458 | 4  | 1214 | 3.97848E-05 |
| Chr3 | 14555113 | 14556817 | 4  | 1705 | 1.74018E-07 |
| Chr3 | 14565026 | 14568426 | 8  | 3401 | 5.16E-12    |
| Chr3 | 14739447 | 14741622 | 5  | 2176 | 2.84006E-06 |
| Chr3 | 14795899 | 14798559 | 10 | 2661 | 5.05E-12    |
| Chr3 | 14799573 | 14800534 | 4  | 962  | 0.000118256 |
| Chr3 | 14803718 | 14805850 | 4  | 2133 | 4.12248E-06 |
| Chr3 | 14830120 | 14830530 | 4  | 411  | 1.73776E-05 |
| Chr3 | 14849700 | 14850752 | 7  | 1053 | 7.57E-09    |
| Chr3 | 14857297 | 14858169 | 4  | 873  | 4.57955E-06 |
| Chr3 | 15041081 | 15042602 | 4  | 1522 | 1.26861E-05 |
| Chr3 | 15056926 | 15057567 | 4  | 642  | 2.83799E-06 |
| Chr3 | 15114042 | 15115184 | 4  | 1143 | 4.48E-07    |
| Chr3 | 15144162 | 15145709 | 5  | 1548 | 1.94E-07    |
| Chr3 | 15246014 | 15246408 | 4  | 395  | 4.30775E-06 |
| Chr3 | 15262655 | 15264002 | 6  | 1348 | 4.17E-10    |
| Chr3 | 15304034 | 15305747 | 6  | 1714 | 7.42525E-05 |
| Chr3 | 15328363 | 15329142 | 5  | 780  | 1.72656E-08 |
| Chr3 | 15376791 | 15377291 | 5  | 501  | 2.01757E-06 |
| Chr3 | 15411041 | 15411562 | 4  | 522  | 1.70845E-06 |
| Chr3 | 15441380 | 15442428 | 4  | 1049 | 5.72021E-06 |
| Chr3 | 15461675 | 15463424 | 4  | 1750 | 1.0241E-05  |
| Chr3 | 15465698 | 15467050 | 6  | 1353 | 2.83E-09    |
| Chr3 | 15497751 | 15498840 | 4  | 1090 | 4.61381E-06 |
| Chr3 | 15533866 | 15535028 | 4  | 1163 | 5.72204E-06 |
| Chr3 | 15574153 | 15575627 | 4  | 1475 | 4.8672E-05  |
| Chr3 | 15580772 | 15582898 | 8  | 2127 | 6.20E-09    |
| Chr3 | 15711388 | 15712384 | 4  | 997  | 1.1425E-05  |
| Chr3 | 15719319 | 15719977 | 4  | 659  | 7.53346E-05 |
| Chr3 | 15933496 | 15933868 | 4  | 373  | 9.7493E-06  |
| Chr3 | 16337417 | 16337950 | 4  | 534  | 0.000111421 |
| Chr3 | 16339477 | 16339885 | 4  | 409  | 3.22E-08    |
| Chr3 | 16959029 | 16960496 | 4  | 1468 | 8.7519E-05  |
| Chr3 | 17683391 | 17684026 | 5  | 636  | 8.89E-08    |
| Chr3 | 17978925 | 17980950 | 6  | 2026 | 1.83E-07    |
| Chr3 | 20202657 | 20203400 | 6  | 744  | 2.97E-08    |
| Chr3 | 20306930 | 20307538 | 4  | 609  | 2.00915E-06 |
| Chr3 | 21326230 | 21329116 | 6  | 2887 | 2.66E-11    |
| Chr3 | 23111574 | 23113756 | 4  | 2183 | 0.000123466 |
| Chr4 | 1673480  | 1675746  | 8  | 2267 | 1.62E-11    |
| Chr4 | 1685052  | 1685591  | 6  | 540  | 2.26E-08    |
| Chr4 | 1688732  | 1689546  | 5  | 815  | 7.49783E-06 |
| Chr4 | 1692587  | 1694716  | 4  | 2130 | 7.46234E-05 |
| Chr4 | 1787881  | 1788761  | 4  | 881  | 5.36E-08    |
| Chr4 | 1799515  | 1800690  | 4  | 1176 | 2.91E-08    |
| Chr4 | 1804827  | 1806279  | 4  | 1453 | 9.97219E-06 |
| Chr4 | 1822043  | 1823289  | 4  | 1247 | 1.07E-08    |
| Chr4 | 1855442  | 1856233  | 4  | 792  | 2.29195E-05 |
| Chr4 | 1937009  | 1938192  | 4  | 1184 | 5.1998E-06  |
| Chr4 | 1948394  | 1949765  | 4  | 1372 | 1.84471E-06 |
| Chr4 | 2003469  | 2006857  | 10 | 3389 | 2.71E-11    |
| Chr4 | 2206915  | 2208317  | 4  | 1403 | 1.80767E-05 |
| Chr4 | 2212297  | 2214011  | 5  | 1715 | 2.55E-07    |
| Chr4 | 2270656  | 2272525  | 6  | 1870 | 5.57249E-07 |
| Chr4 | 2284525  | 2286192  | 4  | 1668 | 1.36045E-06 |
| Chr4 | 2357830  | 2358073  | 4  | 244  | 7.96096E-06 |
| Chr4 | 2599333  | 2601902  | 6  | 2570 | 1.84897E-06 |
| Chr4 | 2705767  | 2707787  | 4  | 2021 | 8.45719E-05 |
| Chr4 | 2762597  | 2763510  | 4  | 914  | 3.32701E-05 |
| Chr4 | 2785290  | 2786245  | 4  | 956  | 1.00E-06    |

|      |         |         |    |      |             |
|------|---------|---------|----|------|-------------|
| Chr4 | 2830239 | 2832086 | 6  | 1848 | 6.18E-09    |
| Chr4 | 2837381 | 2839349 | 6  | 1969 | 6.93E-10    |
| Chr4 | 2852217 | 2854211 | 5  | 1995 | 4.14135E-06 |
| Chr4 | 2894860 | 2896133 | 5  | 1274 | 1.63998E-06 |
| Chr4 | 3009813 | 3012865 | 7  | 3053 | 5.52E-09    |
| Chr4 | 3054384 | 3055369 | 6  | 986  | 3.78297E-06 |
| Chr4 | 3061186 | 3061339 | 5  | 154  | 1.20404E-06 |
| Chr4 | 3085933 | 3086979 | 4  | 1047 | 1.46647E-05 |
| Chr4 | 3091549 | 3091590 | 4  | 42   | 1.64E-10    |
| Chr4 | 3095278 | 3096848 | 4  | 1571 | 2.35884E-07 |
| Chr4 | 3106781 | 3108406 | 5  | 1626 | 1.37E-08    |
| Chr4 | 3109431 | 3111355 | 5  | 1925 | 6.43E-09    |
| Chr4 | 3134556 | 3137029 | 8  | 2474 | 2.32E-13    |
| Chr4 | 3139391 | 3140800 | 4  | 1410 | 2.18064E-05 |
| Chr4 | 3175179 | 3175961 | 4  | 783  | 6.26E-08    |
| Chr4 | 3180350 | 3181087 | 4  | 738  | 0.000474792 |
| Chr4 | 3349415 | 3350347 | 4  | 933  | 1.76565E-06 |
| Chr4 | 3364968 | 3365682 | 4  | 715  | 1.47023E-06 |
| Chr4 | 3408663 | 3409910 | 4  | 1248 | 5.55229E-05 |
| Chr4 | 3482169 | 3482994 | 5  | 826  | 4.44E-07    |
| Chr4 | 3500255 | 3500860 | 5  | 606  | 1.0523E-05  |
| Chr4 | 3561301 | 3563123 | 5  | 1823 | 4.18E-07    |
| Chr4 | 3620590 | 3623264 | 7  | 2675 | 1.48711E-06 |
| Chr4 | 3624345 | 3625036 | 4  | 692  | 0.000140404 |
| Chr4 | 3626791 | 3627599 | 4  | 809  | 1.97742E-05 |
| Chr4 | 3633610 | 3634821 | 4  | 1212 | 1.08385E-06 |
| Chr4 | 3677505 | 3679345 | 6  | 1841 | 2.27E-07    |
| Chr4 | 3683372 | 3684295 | 4  | 924  | 2.26E-07    |
| Chr4 | 3698566 | 3699884 | 6  | 1319 | 6.74E-08    |
| Chr4 | 3738363 | 3739483 | 4  | 1121 | 8.49E-08    |
| Chr4 | 3740672 | 3741183 | 4  | 512  | 1.04E-08    |
| Chr4 | 3777924 | 3779394 | 4  | 1471 | 1.51984E-06 |
| Chr4 | 3784477 | 3786064 | 4  | 1588 | 1.97655E-05 |
| Chr4 | 3795868 | 3796870 | 4  | 1003 | 3.18E-07    |
| Chr4 | 3839413 | 3840813 | 7  | 1401 | 1.49467E-07 |
| Chr4 | 3844144 | 3845891 | 4  | 1748 | 0.000123769 |
| Chr4 | 3871992 | 3873400 | 4  | 1409 | 2.54E-07    |
| Chr4 | 3903089 | 3904808 | 5  | 1720 | 1.07673E-06 |
| Chr4 | 3913937 | 3915490 | 6  | 1554 | 1.02E-09    |
| Chr4 | 3933819 | 3934503 | 4  | 685  | 1.24767E-06 |
| Chr4 | 3946579 | 3947142 | 5  | 564  | 1.01705E-06 |
| Chr4 | 3950538 | 3955910 | 56 | 5373 | 2.85E-75    |
| Chr4 | 3959213 | 3961629 | 7  | 2417 | 7.66E-10    |
| Chr4 | 3966407 | 3969592 | 9  | 3186 | 1.07E-11    |
| Chr4 | 3977492 | 3978906 | 12 | 1415 | 1.61E-13    |
| Chr4 | 3992525 | 3996580 | 16 | 4056 | 1.84E-16    |
| Chr4 | 3998201 | 3998381 | 4  | 181  | 6.97E-07    |
| Chr4 | 4019727 | 4020157 | 4  | 431  | 2.32E-07    |
| Chr4 | 4023291 | 4024706 | 4  | 1416 | 8.3411E-07  |
| Chr4 | 4041084 | 4042513 | 7  | 1430 | 1.31E-08    |
| Chr4 | 4067919 | 4069452 | 5  | 1534 | 1.95E-07    |
| Chr4 | 4160068 | 4160878 | 5  | 811  | 2.92389E-05 |
| Chr4 | 4240980 | 4243201 | 5  | 2222 | 8.32322E-06 |
| Chr4 | 4244221 | 4246201 | 4  | 1981 | 6.66E-08    |
| Chr4 | 4249146 | 4249572 | 4  | 427  | 9.47348E-06 |
| Chr4 | 4277487 | 4279435 | 7  | 1949 | 1.80E-08    |
| Chr4 | 4286768 | 4287617 | 6  | 850  | 5.74E-11    |
| Chr4 | 4289151 | 4290141 | 8  | 991  | 1.82E-09    |
| Chr4 | 4294758 | 4295998 | 5  | 1241 | 9.09E-07    |
| Chr4 | 4306678 | 4307048 | 4  | 371  | 1.49974E-05 |
| Chr4 | 4326928 | 4327967 | 5  | 1040 | 4.27E-10    |
| Chr4 | 4384736 | 4386663 | 4  | 1928 | 1.42506E-06 |
| Chr4 | 4412706 | 4413439 | 4  | 734  | 5.06E-08    |

|      |          |          |    |      |             |
|------|----------|----------|----|------|-------------|
| Chr4 | 4599191  | 4601821  | 6  | 2631 | 3.49E-08    |
| Chr4 | 4680920  | 4683037  | 4  | 2118 | 6.95E-07    |
| Chr4 | 4720605  | 4721502  | 4  | 898  | 5.60423E-05 |
| Chr4 | 4724074  | 4725135  | 4  | 1062 | 2.47E-07    |
| Chr4 | 4777623  | 4778463  | 5  | 841  | 2.53035E-06 |
| Chr4 | 4853708  | 4854813  | 7  | 1106 | 2.64E-11    |
| Chr4 | 4975041  | 4975108  | 4  | 68   | 1.59E-07    |
| Chr4 | 4997103  | 4998246  | 4  | 1144 | 8.92417E-06 |
| Chr4 | 5039810  | 5042296  | 5  | 2487 | 1.99E-07    |
| Chr4 | 5046745  | 5049517  | 5  | 2773 | 1.54E-08    |
| Chr4 | 5059831  | 5062249  | 6  | 2419 | 8.78E-08    |
| Chr4 | 5064923  | 5067074  | 4  | 2152 | 2.82622E-07 |
| Chr4 | 5069755  | 5070883  | 5  | 1129 | 4.41E-10    |
| Chr4 | 5074025  | 5077555  | 9  | 3531 | 6.57E-12    |
| Chr4 | 5530406  | 5531118  | 4  | 713  | 1.17E-08    |
| Chr4 | 5583551  | 5584673  | 4  | 1123 | 2.68466E-06 |
| Chr4 | 5688660  | 5689859  | 4  | 1200 | 7.88E-07    |
| Chr4 | 5940636  | 5941110  | 5  | 475  | 7.80E-07    |
| Chr4 | 5955403  | 5955923  | 5  | 521  | 5.90E-08    |
| Chr4 | 5957115  | 5959669  | 5  | 2555 | 2.50E-08    |
| Chr4 | 5966883  | 5969351  | 7  | 2469 | 4.60E-12    |
| Chr4 | 6467932  | 6469399  | 8  | 1468 | 5.11E-12    |
| Chr4 | 8903315  | 8904201  | 4  | 887  | 0.00010328  |
| Chr4 | 9509839  | 9510917  | 4  | 1079 | 1.23E-07    |
| Chr4 | 10051545 | 10053110 | 4  | 1566 | 8.48E-07    |
| Chr4 | 11036787 | 11037505 | 5  | 719  | 1.89E-07    |
| Chr4 | 13329548 | 13332295 | 9  | 2748 | 1.23E-08    |
| Chr4 | 14967496 | 14967810 | 4  | 315  | 4.71697E-06 |
| Chr4 | 17712661 | 17714101 | 4  | 1441 | 1.01302E-06 |
| Chr5 | 2259797  | 2260526  | 4  | 730  | 6.20E-07    |
| Chr5 | 3253162  | 3253235  | 4  | 74   | 1.41926E-06 |
| Chr5 | 4320399  | 4321242  | 4  | 844  | 3.18794E-07 |
| Chr5 | 5644133  | 5645567  | 4  | 1435 | 1.84E-07    |
| Chr5 | 6437297  | 6438383  | 4  | 1087 | 1.32413E-06 |
| Chr5 | 6631672  | 6632575  | 4  | 904  | 1.05678E-05 |
| Chr5 | 7038383  | 7039171  | 4  | 789  | 7.76736E-06 |
| Chr5 | 9206908  | 9207228  | 4  | 321  | 4.10183E-05 |
| Chr5 | 9996723  | 9998301  | 4  | 1579 | 7.73E-07    |
| Chr5 | 10052027 | 10054365 | 5  | 2339 | 4.49E-08    |
| Chr5 | 10098006 | 10099931 | 4  | 1926 | 2.39869E-06 |
| Chr5 | 10106448 | 10107241 | 4  | 794  | 2.3277E-06  |
| Chr5 | 10144730 | 10147469 | 6  | 2740 | 2.1743E-07  |
| Chr5 | 10258988 | 10260229 | 4  | 1242 | 6.26514E-05 |
| Chr5 | 10363754 | 10364717 | 4  | 964  | 6.47E-07    |
| Chr5 | 10365819 | 10367269 | 6  | 1451 | 1.29E-09    |
| Chr5 | 10557904 | 10558783 | 4  | 880  | 2.69663E-06 |
| Chr5 | 10592186 | 10594359 | 5  | 2174 | 5.22E-07    |
| Chr5 | 10888099 | 10888366 | 4  | 268  | 6.35E-08    |
| Chr5 | 10976277 | 10977532 | 4  | 1256 | 2.99716E-05 |
| Chr5 | 11079617 | 11081417 | 5  | 1801 | 6.93038E-05 |
| Chr5 | 11135814 | 11138001 | 4  | 2188 | 7.43E-07    |
| Chr5 | 11175716 | 11176304 | 4  | 589  | 3.51698E-06 |
| Chr5 | 11184651 | 11186219 | 21 | 1569 | 1.37E-12    |
| Chr5 | 11187788 | 11188495 | 5  | 708  | 1.0299E-05  |
| Chr5 | 11212940 | 11214329 | 7  | 1390 | 4.18E-10    |
| Chr5 | 11295197 | 11296767 | 7  | 1571 | 2.61E-07    |
| Chr5 | 11328415 | 11328823 | 4  | 409  | 9.06E-07    |
| Chr5 | 11341207 | 11342799 | 4  | 1593 | 8.86005E-05 |
| Chr5 | 11373659 | 11374974 | 4  | 1316 | 2.94E-08    |
| Chr5 | 11394485 | 11395826 | 4  | 1342 | 0.000105862 |
| Chr5 | 11407477 | 11409027 | 5  | 1551 | 1.43865E-06 |
| Chr5 | 11429190 | 11430364 | 4  | 1175 | 2.41601E-05 |
| Chr5 | 11438492 | 11439317 | 5  | 826  | 1.00373E-07 |



|      |          |          |    |      |             |
|------|----------|----------|----|------|-------------|
| Chr5 | 11478511 | 11480280 | 7  | 1770 | 1.09E-08    |
| Chr5 | 11505383 | 11506267 | 5  | 885  | 2.39E-08    |
| Chr5 | 11535891 | 11537222 | 4  | 1332 | 7.92913E-06 |
| Chr5 | 11572388 | 11573135 | 5  | 748  | 2.67E-08    |
| Chr5 | 11592910 | 11594987 | 5  | 2078 | 5.42E-09    |
| Chr5 | 11602174 | 11603576 | 5  | 1403 | 6.65E-09    |
| Chr5 | 11701665 | 11704223 | 15 | 2559 | 1.82E-10    |
| Chr5 | 11705352 | 11709217 | 15 | 3866 | 2.42E-18    |
| Chr5 | 11711005 | 11712175 | 4  | 1171 | 5.10702E-06 |
| Chr5 | 11723431 | 11724855 | 13 | 1425 | 5.03E-08    |
| Chr5 | 11726439 | 11729412 | 22 | 2974 | 1.57E-15    |
| Chr5 | 11730691 | 11738141 | 30 | 7451 | 2.82E-21    |
| Chr5 | 11763400 | 11766653 | 8  | 3254 | 3.27E-08    |
| Chr5 | 11768047 | 11770062 | 8  | 2016 | 9.37E-10    |
| Chr5 | 11771857 | 11772332 | 4  | 476  | 7.85774E-06 |
| Chr5 | 11833285 | 11835498 | 6  | 2214 | 3.15E-07    |
| Chr5 | 11842699 | 11843823 | 6  | 1125 | 7.56327E-05 |
| Chr5 | 11847045 | 11847698 | 4  | 654  | 4.66399E-05 |
| Chr5 | 11912596 | 11913604 | 5  | 1009 | 2.60E-08    |
| Chr5 | 11936485 | 11937697 | 7  | 1213 | 9.03E-07    |
| Chr5 | 11939288 | 11944595 | 26 | 5308 | 8.14E-27    |
| Chr5 | 11952502 | 11952756 | 4  | 255  | 2.26196E-06 |
| Chr5 | 11990523 | 11993066 | 12 | 2544 | 1.51E-07    |
| Chr5 | 11994970 | 11996157 | 4  | 1188 | 7.23E-07    |
| Chr5 | 12001740 | 12003413 | 4  | 1674 | 1.99837E-05 |
| Chr5 | 12012703 | 12014664 | 4  | 1962 | 6.41092E-05 |
| Chr5 | 12019620 | 12022411 | 7  | 2792 | 6.82E-10    |
| Chr5 | 12036605 | 12041730 | 14 | 5126 | 3.01E-15    |
| Chr5 | 12073443 | 12075192 | 5  | 1750 | 1.25E-07    |
| Chr5 | 12110338 | 12113056 | 5  | 2719 | 3.75E-08    |
| Chr5 | 12114123 | 12116614 | 5  | 2492 | 3.69E-08    |
| Chr5 | 12123515 | 12126532 | 11 | 3018 | 8.26E-11    |
| Chr5 | 12143433 | 12144412 | 6  | 980  | 3.48E-08    |
| Chr5 | 12146672 | 12148503 | 12 | 1832 | 4.22E-12    |
| Chr5 | 12210861 | 12210895 | 4  | 35   | 5.72E-07    |
| Chr5 | 12223170 | 12224088 | 4  | 919  | 3.51927E-06 |
| Chr5 | 12226048 | 12227252 | 5  | 1205 | 1.73E-09    |
| Chr5 | 12245592 | 12250616 | 9  | 5025 | 1.44E-09    |
| Chr5 | 12263827 | 12264066 | 5  | 240  | 9.55E-09    |
| Chr5 | 12293147 | 12294036 | 4  | 890  | 2.43882E-06 |
| Chr5 | 12326741 | 12328057 | 4  | 1317 | 9.51917E-06 |
| Chr5 | 12348352 | 12349621 | 5  | 1270 | 1.42E-08    |
| Chr5 | 12362061 | 12363402 | 4  | 1342 | 0.000117623 |
| Chr5 | 12375594 | 12377193 | 6  | 1600 | 6.44E-07    |
| Chr5 | 12431053 | 12431962 | 4  | 910  | 3.35239E-05 |
| Chr5 | 12458275 | 12460608 | 6  | 2334 | 1.38E-07    |
| Chr5 | 12574268 | 12577144 | 7  | 2877 | 3.91E-12    |
| Chr5 | 12581583 | 12582524 | 5  | 942  | 5.69E-07    |
| Chr5 | 12611312 | 12612489 | 4  | 1178 | 1.13E-07    |
| Chr5 | 12614009 | 12614965 | 4  | 957  | 9.6744E-05  |
| Chr5 | 12744142 | 12745033 | 4  | 892  | 2.095E-05   |
| Chr5 | 12754016 | 12755026 | 4  | 1011 | 0.000190239 |
| Chr5 | 12757140 | 12757959 | 5  | 820  | 1.06E-07    |
| Chr5 | 12770914 | 12773803 | 6  | 2890 | 5.63E-08    |
| Chr5 | 12967726 | 12968663 | 4  | 938  | 0.000113146 |
| Chr5 | 12998064 | 12999241 | 5  | 1178 | 2.12E-07    |
| Chr5 | 13071723 | 13072188 | 4  | 466  | 0.000510951 |
| Chr5 | 13173435 | 13174299 | 5  | 865  | 1.71576E-06 |
| Chr5 | 13254807 | 13255138 | 4  | 332  | 5.94253E-07 |
| Chr5 | 13309044 | 13310850 | 4  | 1807 | 4.02E-08    |
| Chr5 | 13401009 | 13401548 | 4  | 540  | 8.51E-08    |
| Chr5 | 13846043 | 13847280 | 4  | 1238 | 1.18922E-06 |
| Chr5 | 13884311 | 13885210 | 4  | 900  | 7.47189E-05 |

|      |          |          |   |      |             |
|------|----------|----------|---|------|-------------|
| Chr5 | 14267933 | 14269345 | 4 | 1413 | 2.58E-08    |
| Chr5 | 14702654 | 14703779 | 5 | 1126 | 1.17184E-05 |
| Chr5 | 15337178 | 15338499 | 4 | 1322 | 6.71E-07    |
| Chr5 | 17093222 | 17095321 | 6 | 2100 | 5.97E-12    |
| Chr5 | 17603745 | 17604305 | 4 | 561  | 2.37089E-06 |
| Chr5 | 18472099 | 18473360 | 6 | 1262 | 1.32E-09    |
| Chr5 | 19360756 | 19362585 | 6 | 1830 | 2.57E-10    |
| Chr5 | 22615209 | 22615411 | 4 | 203  | 7.75E-07    |
| Chr5 | 24722999 | 24723680 | 5 | 682  | 5.31E-08    |
| Chr5 | 25282679 | 25283572 | 5 | 894  | 5.33E-07    |

**-Pit Root 7dat (Hypo-DMRs)**

| Chromosome | Start    | End      | number of DMCs | DMR lenght | P-value     |
|------------|----------|----------|----------------|------------|-------------|
| Chr1       | 2719399  | 2720580  | 5              | 1182       | 3.77E-07    |
| Chr1       | 6273963  | 6275024  | 4              | 1062       | 0.000243688 |
| Chr1       | 7068092  | 7070951  | 6              | 2860       | 4.10E-09    |
| Chr1       | 7353108  | 7357715  | 15             | 4608       | 1.24E-15    |
| Chr1       | 7362656  | 7365072  | 10             | 2417       | 2.76E-13    |
| Chr1       | 8729700  | 8731065  | 5              | 1366       | 1.44373E-06 |
| Chr1       | 8790318  | 8791385  | 4              | 1068       | 0.000271185 |
| Chr1       | 8928521  | 8929144  | 5              | 624        | 6.21E-07    |
| Chr1       | 8931577  | 8932596  | 4              | 1020       | 1.80175E-05 |
| Chr1       | 9372060  | 9373271  | 4              | 1212       | 1.38861E-05 |
| Chr1       | 9687265  | 9687706  | 4              | 442        | 8.36021E-06 |
| Chr1       | 10357469 | 10359127 | 5              | 1659       | 3.10503E-05 |
| Chr1       | 10699157 | 10700480 | 6              | 1324       | 2.18E-08    |
| Chr1       | 12016205 | 12017206 | 4              | 1002       | 1.91305E-05 |
| Chr1       | 12408004 | 12409648 | 5              | 1645       | 2.70E-07    |
| Chr1       | 12569097 | 12570592 | 4              | 1496       | 2.18281E-06 |
| Chr1       | 12671445 | 12672024 | 4              | 580        | 0.000291127 |
| Chr1       | 12678082 | 12679494 | 6              | 1413       | 7.39E-07    |
| Chr1       | 13003305 | 13003834 | 6              | 530        | 5.21E-08    |
| Chr1       | 13381807 | 13382582 | 4              | 776        | 7.38171E-05 |
| Chr1       | 13560150 | 13561369 | 4              | 1220       | 1.1596E-05  |
| Chr1       | 13579013 | 13579967 | 4              | 955        | 0.00038736  |
| Chr1       | 13605328 | 13606257 | 4              | 930        | 7.39426E-06 |
| Chr1       | 13631872 | 13634292 | 6              | 2421       | 7.83E-08    |
| Chr1       | 13678615 | 13681440 | 6              | 2826       | 1.19E-10    |
| Chr1       | 13690565 | 13692610 | 6              | 2046       | 5.82E-08    |
| Chr1       | 13773717 | 13774625 | 5              | 909        | 8.03475E-06 |
| Chr1       | 13787826 | 13789458 | 5              | 1633       | 3.75E-10    |
| Chr1       | 13821470 | 13823284 | 5              | 1815       | 5.09994E-06 |
| Chr1       | 13917849 | 13919888 | 7              | 2040       | 2.05E-08    |
| Chr1       | 13954173 | 13956087 | 7              | 1915       | 1.75E-09    |
| Chr1       | 13960203 | 13960985 | 5              | 783        | 2.70E-09    |
| Chr1       | 14087004 | 14089128 | 5              | 2125       | 7.88004E-06 |
| Chr1       | 14119851 | 14123062 | 5              | 3212       | 3.26E-08    |
| Chr1       | 14133649 | 14133737 | 5              | 89         | 2.58E-09    |
| Chr1       | 14182626 | 14183608 | 5              | 983        | 8.45E-07    |
| Chr1       | 14198383 | 14200128 | 5              | 1746       | 4.2543E-06  |
| Chr1       | 14224428 | 14226025 | 4              | 1598       | 5.4148E-05  |
| Chr1       | 14231298 | 14232498 | 4              | 1201       | 2.44105E-06 |
| Chr1       | 14259243 | 14260559 | 4              | 1317       | 1.17E-07    |
| Chr1       | 14261858 | 14262799 | 4              | 942        | 1.23816E-06 |
| Chr1       | 14273436 | 14274574 | 4              | 1139       | 1.33058E-05 |
| Chr1       | 14316434 | 14316903 | 5              | 470        | 1.26E-09    |
| Chr1       | 14336333 | 14338381 | 5              | 2049       | 5.88E-08    |
| Chr1       | 14449978 | 14451141 | 4              | 1164       | 3.09169E-05 |
| Chr1       | 14454817 | 14455678 | 4              | 862        | 1.60393E-05 |
| Chr1       | 14462559 | 14464242 | 4              | 1684       | 2.41621E-05 |
| Chr1       | 14471243 | 14472002 | 5              | 760        | 1.58E-08    |
| Chr1       | 14486384 | 14488133 | 4              | 1750       | 2.05232E-06 |

|      |          |          |    |      |             |
|------|----------|----------|----|------|-------------|
| Chr1 | 14490418 | 14491173 | 4  | 756  | 6.54E-08    |
| Chr1 | 14493523 | 14495341 | 5  | 1819 | 2.85184E-06 |
| Chr1 | 14502883 | 14503779 | 6  | 897  | 4.02E-08    |
| Chr1 | 14541042 | 14545440 | 10 | 4399 | 2.35E-13    |
| Chr1 | 14600776 | 14601593 | 4  | 818  | 6.30E-10    |
| Chr1 | 14850596 | 14851806 | 4  | 1211 | 6.66202E-06 |
| Chr1 | 15074428 | 15076458 | 9  | 2031 | 1.26E-13    |
| Chr1 | 15082202 | 15085683 | 11 | 3482 | 2.09E-09    |
| Chr1 | 15179446 | 15180545 | 4  | 1100 | 1.41225E-06 |
| Chr1 | 15191637 | 15193328 | 6  | 1692 | 6.55922E-06 |
| Chr1 | 15205150 | 15207646 | 6  | 2497 | 3.05E-08    |
| Chr1 | 15214605 | 15216866 | 5  | 2262 | 1.20E-07    |
| Chr1 | 15446589 | 15446787 | 4  | 199  | 2.47286E-05 |
| Chr1 | 15503388 | 15505819 | 6  | 2432 | 2.86E-11    |
| Chr1 | 15507040 | 15508404 | 4  | 1365 | 1.44448E-06 |
| Chr1 | 15516162 | 15516939 | 4  | 778  | 0.000525576 |
| Chr1 | 15522462 | 15524068 | 6  | 1607 | 1.69E-07    |
| Chr1 | 15550183 | 15551765 | 4  | 1583 | 2.7446E-06  |
| Chr1 | 15559532 | 15561341 | 4  | 1810 | 2.58499E-05 |
| Chr1 | 15678165 | 15679074 | 5  | 910  | 1.65E-07    |
| Chr1 | 15705407 | 15708484 | 9  | 3078 | 2.63E-17    |
| Chr1 | 15709969 | 15711626 | 5  | 1658 | 2.96E-07    |
| Chr1 | 15869643 | 15870373 | 4  | 731  | 2.66932E-05 |
| Chr1 | 16046139 | 16047884 | 4  | 1746 | 1.53E-07    |
| Chr1 | 16102169 | 16102848 | 5  | 680  | 3.48893E-06 |
| Chr1 | 16107738 | 16108789 | 5  | 1052 | 1.25E-08    |
| Chr1 | 16122385 | 16124106 | 5  | 1722 | 5.47E-08    |
| Chr1 | 16382161 | 16384082 | 6  | 1922 | 3.55E-08    |
| Chr1 | 16510381 | 16511404 | 4  | 1024 | 0.000107294 |
| Chr1 | 16513427 | 16514395 | 6  | 969  | 0.000363995 |
| Chr1 | 16517543 | 16519027 | 5  | 1485 | 2.14059E-06 |
| Chr1 | 16522407 | 16525151 | 9  | 2745 | 6.34E-10    |
| Chr1 | 16526901 | 16528138 | 6  | 1238 | 7.94E-07    |
| Chr1 | 16627426 | 16628052 | 5  | 627  | 7.10E-08    |
| Chr1 | 16676462 | 16677741 | 4  | 1280 | 3.41443E-05 |
| Chr1 | 17034844 | 17035685 | 5  | 842  | 3.57E-07    |
| Chr1 | 17036834 | 17037532 | 4  | 699  | 1.0185E-05  |
| Chr1 | 17044785 | 17045441 | 4  | 657  | 1.13204E-06 |
| Chr1 | 17256104 | 17257237 | 4  | 1134 | 2.05E-07    |
| Chr1 | 17258354 | 17259785 | 4  | 1432 | 7.68E-07    |
| Chr1 | 17530826 | 17531667 | 4  | 842  | 2.14857E-06 |
| Chr1 | 17532932 | 17534479 | 6  | 1548 | 3.53E-09    |
| Chr1 | 18111252 | 18111294 | 5  | 43   | 3.65E-08    |
| Chr1 | 18180462 | 18181413 | 4  | 952  | 9.35415E-05 |
| Chr1 | 18967004 | 18967699 | 5  | 696  | 1.41E-07    |
| Chr1 | 22696756 | 22697952 | 5  | 1197 | 0.00076923  |
| Chr2 | 2714     | 3671     | 6  | 958  | 3.09E-07    |
| Chr2 | 9579     | 11391    | 7  | 1813 | 0.031335111 |
| Chr2 | 13089    | 16032    | 7  | 2944 | 3.27E-09    |
| Chr2 | 29024    | 30106    | 5  | 1083 | 3.78E-08    |
| Chr2 | 39802    | 42264    | 8  | 2463 | 2.00E-07    |
| Chr2 | 529990   | 531544   | 6  | 1555 | 6.06E-09    |
| Chr2 | 536289   | 536927   | 4  | 639  | 5.37629E-05 |
| Chr2 | 1420916  | 1421814  | 4  | 899  | 6.06938E-05 |
| Chr2 | 1511121  | 1512953  | 5  | 1833 | 6.93E-09    |
| Chr2 | 1649476  | 1649618  | 4  | 143  | 2.73983E-05 |
| Chr2 | 1884655  | 1886247  | 6  | 1593 | 4.90E-08    |
| Chr2 | 1906744  | 1909610  | 6  | 2867 | 2.5652E-06  |
| Chr2 | 2401493  | 2403392  | 4  | 1900 | 1.45186E-06 |
| Chr2 | 2420889  | 2422434  | 4  | 1546 | 6.30469E-06 |
| Chr2 | 2476956  | 2478123  | 4  | 1168 | 0.000467908 |
| Chr2 | 2482270  | 2483951  | 7  | 1682 | 9.58E-09    |
| Chr2 | 2486849  | 2490373  | 11 | 3525 | 8.81E-12    |

|      |         |         |    |       |             |
|------|---------|---------|----|-------|-------------|
| Chr2 | 2491532 | 2491858 | 4  | 327   | 4.91231E-06 |
| Chr2 | 2595807 | 2597249 | 5  | 1443  | 1.15E-07    |
| Chr2 | 2647059 | 2648461 | 4  | 1403  | 2.53511E-05 |
| Chr2 | 2649634 | 2649793 | 4  | 160   | 1.25E-07    |
| Chr2 | 2749552 | 2751319 | 4  | 1768  | 1.56581E-05 |
| Chr2 | 2770612 | 2771314 | 5  | 703   | 1.86E-08    |
| Chr2 | 2972137 | 2973951 | 4  | 1815  | 9.24E-07    |
| Chr2 | 3071640 | 3072248 | 5  | 609   | 2.55801E-06 |
| Chr2 | 3089439 | 3090364 | 4  | 926   | 7.66478E-05 |
| Chr2 | 3098262 | 3100332 | 5  | 2071  | 4.19333E-06 |
| Chr2 | 3247456 | 3248583 | 6  | 1128  | 5.76E-07    |
| Chr2 | 3267897 | 3268490 | 5  | 594   | 3.58E-08    |
| Chr2 | 3276302 | 3276530 | 5  | 229   | 1.39E-07    |
| Chr2 | 3278981 | 3289374 | 34 | 10394 | 1.64E-38    |
| Chr2 | 3291298 | 3291933 | 4  | 636   | 2.48225E-05 |
| Chr2 | 3310454 | 3311930 | 4  | 1477  | 0.000132593 |
| Chr2 | 3352872 | 3353110 | 4  | 239   | 6.04647E-06 |
| Chr2 | 3357514 | 3359249 | 6  | 1736  | 1.05E-08    |
| Chr2 | 3458956 | 3459428 | 4  | 473   | 2.64171E-06 |
| Chr2 | 3551971 | 3553406 | 4  | 1436  | 2.30333E-06 |
| Chr2 | 3565030 | 3567833 | 6  | 2804  | 1.1526E-06  |
| Chr2 | 3600843 | 3601700 | 4  | 858   | 5.96678E-05 |
| Chr2 | 3606487 | 3607140 | 6  | 654   | 3.55E-07    |
| Chr2 | 3615020 | 3615119 | 5  | 100   | 5.04E-08    |
| Chr2 | 3616851 | 3624539 | 28 | 7689  | 2.02E-25    |
| Chr2 | 3625600 | 3626958 | 8  | 1359  | 0.000502076 |
| Chr2 | 3635918 | 3636990 | 4  | 1073  | 0.000517677 |
| Chr2 | 3677183 | 3678330 | 4  | 1148  | 1.89E-07    |
| Chr2 | 3682703 | 3684863 | 5  | 2161  | 6.84E-09    |
| Chr2 | 3732431 | 3733388 | 4  | 958   | 1.53142E-05 |
| Chr2 | 3758383 | 3761511 | 11 | 3129  | 4.52E-15    |
| Chr2 | 3763973 | 3766199 | 9  | 2227  | 1.03E-12    |
| Chr2 | 3821669 | 3823869 | 5  | 2201  | 6.76E-10    |
| Chr2 | 3836538 | 3838581 | 4  | 2044  | 1.27E-08    |
| Chr2 | 3847864 | 3848237 | 4  | 374   | 4.33514E-06 |
| Chr2 | 3871530 | 3873990 | 6  | 2461  | 4.82E-09    |
| Chr2 | 3878062 | 3879446 | 5  | 1385  | 5.21E-08    |
| Chr2 | 3885364 | 3888273 | 8  | 2910  | 1.67E-09    |
| Chr2 | 3897431 | 3899513 | 4  | 2083  | 1.41015E-06 |
| Chr2 | 3946317 | 3947498 | 5  | 1182  | 2.05809E-06 |
| Chr2 | 3950877 | 3952840 | 7  | 1964  | 1.92E-07    |
| Chr2 | 3974182 | 3975357 | 4  | 1176  | 2.07E-07    |
| Chr2 | 3992996 | 3994013 | 4  | 1018  | 1.03493E-05 |
| Chr2 | 4124778 | 4125938 | 4  | 1161  | 1.77088E-06 |
| Chr2 | 4151417 | 4152661 | 4  | 1245  | 6.41032E-07 |
| Chr2 | 4173255 | 4175429 | 5  | 2175  | 6.61E-07    |
| Chr2 | 4192899 | 4193077 | 4  | 179   | 5.00E-07    |
| Chr2 | 4208004 | 4209446 | 7  | 1443  | 1.60E-10    |
| Chr2 | 4277407 | 4278053 | 5  | 647   | 1.24E-08    |
| Chr2 | 4288732 | 4291392 | 8  | 2661  | 2.93E-10    |
| Chr2 | 4383936 | 4385742 | 6  | 1807  | 7.02E-11    |
| Chr2 | 4396489 | 4398209 | 6  | 1721  | 1.92E-07    |
| Chr2 | 4461661 | 4465523 | 8  | 3863  | 1.91E-11    |
| Chr2 | 4492668 | 4495726 | 9  | 3059  | 2.95E-15    |
| Chr2 | 4595951 | 4599315 | 8  | 3365  | 1.21E-09    |
| Chr2 | 4693844 | 4694615 | 6  | 772   | 1.39E-09    |
| Chr2 | 4699272 | 4701774 | 8  | 2503  | 4.44E-10    |
| Chr2 | 4716111 | 4717607 | 4  | 1497  | 3.33997E-06 |
| Chr2 | 4727882 | 4728473 | 4  | 592   | 0.000100139 |
| Chr2 | 4779736 | 4780126 | 5  | 391   | 1.06E-09    |
| Chr2 | 4782449 | 4783298 | 6  | 850   | 1.05363E-06 |
| Chr2 | 4816914 | 4818314 | 6  | 1401  | 2.26E-10    |
| Chr2 | 4850535 | 4853850 | 8  | 3316  | 6.82E-10    |

|      |          |          |   |      |             |
|------|----------|----------|---|------|-------------|
| Chr2 | 4855804  | 4856625  | 4 | 822  | 1.06178E-05 |
| Chr2 | 4901296  | 4902483  | 4 | 1188 | 0.000168068 |
| Chr2 | 4907635  | 4908811  | 4 | 1177 | 2.92753E-06 |
| Chr2 | 4983102  | 4983874  | 4 | 773  | 1.53795E-06 |
| Chr2 | 4988171  | 4989525  | 5 | 1355 | 2.64E-07    |
| Chr2 | 4992386  | 4994038  | 6 | 1653 | 3.69E-08    |
| Chr2 | 5090797  | 5093735  | 9 | 2939 | 1.58E-12    |
| Chr2 | 5232947  | 5235337  | 5 | 2391 | 3.57E-08    |
| Chr2 | 5329976  | 5331080  | 4 | 1105 | 0.000164206 |
| Chr2 | 5340148  | 5340570  | 4 | 423  | 3.45303E-06 |
| Chr2 | 5367546  | 5368486  | 5 | 941  | 2.20687E-06 |
| Chr2 | 5443805  | 5445280  | 4 | 1476 | 1.20925E-06 |
| Chr2 | 5472820  | 5473814  | 4 | 995  | 0.000161893 |
| Chr2 | 5477692  | 5479772  | 5 | 2081 | 1.54843E-06 |
| Chr2 | 5570595  | 5571904  | 5 | 1310 | 1.10E-07    |
| Chr2 | 5602345  | 5604405  | 4 | 2061 | 6.43908E-06 |
| Chr2 | 5626782  | 5628509  | 4 | 1728 | 8.04855E-06 |
| Chr2 | 5635655  | 5636483  | 4 | 829  | 6.31441E-06 |
| Chr2 | 5729492  | 5730976  | 4 | 1485 | 2.86E-07    |
| Chr2 | 5786728  | 5787650  | 4 | 923  | 5.8686E-06  |
| Chr2 | 5848639  | 5850780  | 6 | 2142 | 2.74E-07    |
| Chr2 | 5995016  | 5997638  | 5 | 2623 | 4.04E-07    |
| Chr2 | 6222032  | 6223093  | 4 | 1062 | 2.69975E-05 |
| Chr2 | 6436924  | 6437521  | 4 | 598  | 2.21E-07    |
| Chr2 | 6623501  | 6624132  | 4 | 632  | 9.6402E-06  |
| Chr2 | 6719678  | 6720925  | 5 | 1248 | 1.29E-08    |
| Chr2 | 6770052  | 6772310  | 5 | 2259 | 6.23E-07    |
| Chr2 | 6781657  | 6783257  | 5 | 1601 | 2.89E-07    |
| Chr2 | 6846619  | 6846959  | 5 | 341  | 5.11E-09    |
| Chr2 | 6936090  | 6937748  | 4 | 1659 | 8.14986E-06 |
| Chr2 | 6954626  | 6956171  | 5 | 1546 | 4.23E-07    |
| Chr2 | 7015608  | 7016870  | 5 | 1263 | 1.02E-07    |
| Chr2 | 7226122  | 7227240  | 5 | 1119 | 4.01E-08    |
| Chr2 | 7230698  | 7231765  | 5 | 1068 | 2.50604E-07 |
| Chr2 | 9194013  | 9195123  | 4 | 1111 | 0.000116797 |
| Chr2 | 9692155  | 9692175  | 6 | 21   | 3.00E-14    |
| Chr2 | 10598287 | 10599639 | 4 | 1353 | 2.4673E-05  |
| Chr2 | 10875725 | 10877209 | 6 | 1485 | 1.08904E-07 |
| Chr2 | 12452751 | 12453923 | 4 | 1173 | 1.24E-07    |
| Chr2 | 18703085 | 18703179 | 5 | 95   | 1.68E-08    |
| Chr3 | 6470650  | 6470976  | 4 | 327  | 9.21E-07    |
| Chr3 | 8101233  | 8101571  | 4 | 339  | 9.16829E-06 |
| Chr3 | 9692664  | 9695345  | 6 | 2682 | 5.69E-09    |
| Chr3 | 10342724 | 10343601 | 4 | 878  | 2.22E-09    |
| Chr3 | 10480434 | 10481933 | 8 | 1500 | 1.22E-08    |
| Chr3 | 11145066 | 11146851 | 4 | 1786 | 1.97733E-06 |
| Chr3 | 11174476 | 11175408 | 4 | 933  | 3.66E-08    |
| Chr3 | 11356397 | 11356413 | 4 | 17   | 1.12E-09    |
| Chr3 | 11417117 | 11419292 | 4 | 2176 | 3.24761E-07 |
| Chr3 | 11579452 | 11580235 | 4 | 784  | 1.78E-07    |
| Chr3 | 11583233 | 11584387 | 5 | 1155 | 3.20E-09    |
| Chr3 | 11634342 | 11635210 | 4 | 869  | 2.92557E-06 |
| Chr3 | 11636246 | 11639250 | 7 | 3005 | 4.02E-09    |
| Chr3 | 11685014 | 11686798 | 7 | 1785 | 9.78E-11    |
| Chr3 | 11881306 | 11882520 | 4 | 1215 | 6.09E-08    |
| Chr3 | 12026033 | 12027294 | 5 | 1262 | 2.39E-07    |
| Chr3 | 12028784 | 12029541 | 4 | 758  | 3.57E-07    |
| Chr3 | 12033468 | 12034048 | 4 | 581  | 2.62E-07    |
| Chr3 | 12044489 | 12046920 | 6 | 2432 | 8.39E-08    |
| Chr3 | 12069155 | 12070530 | 5 | 1376 | 5.74E-08    |
| Chr3 | 12180868 | 12182595 | 4 | 1728 | 1.83672E-05 |
| Chr3 | 12199567 | 12200661 | 4 | 1095 | 0.000384517 |
| Chr3 | 12202117 | 12204810 | 6 | 2694 | 7.91E-10    |

|      |          |          |    |      |             |
|------|----------|----------|----|------|-------------|
| Chr3 | 12293304 | 12294434 | 4  | 1131 | 0.000239854 |
| Chr3 | 12395647 | 12396995 | 6  | 1349 | 5.70E-07    |
| Chr3 | 12484938 | 12485577 | 4  | 640  | 2.28566E-06 |
| Chr3 | 12493258 | 12494939 | 5  | 1682 | 2.47E-07    |
| Chr3 | 12496546 | 12499095 | 8  | 2550 | 2.70E-10    |
| Chr3 | 12528707 | 12531872 | 6  | 3166 | 1.33E-08    |
| Chr3 | 12534351 | 12536291 | 6  | 1941 | 1.07E-07    |
| Chr3 | 12539196 | 12540441 | 5  | 1246 | 2.98474E-06 |
| Chr3 | 12652536 | 12653498 | 4  | 963  | 4.77411E-06 |
| Chr3 | 12700924 | 12701557 | 4  | 634  | 1.74355E-06 |
| Chr3 | 12749385 | 12750997 | 5  | 1613 | 7.93E-08    |
| Chr3 | 12762829 | 12765693 | 6  | 2865 | 1.6157E-06  |
| Chr3 | 12826152 | 12827509 | 4  | 1358 | 4.04E-07    |
| Chr3 | 12862570 | 12864134 | 4  | 1565 | 8.87E-07    |
| Chr3 | 12939261 | 12941244 | 5  | 1984 | 4.851E-06   |
| Chr3 | 12944298 | 12945884 | 7  | 1587 | 1.11E-09    |
| Chr3 | 12961553 | 12964962 | 11 | 3410 | 1.06E-14    |
| Chr3 | 13025330 | 13026327 | 4  | 998  | 3.43834E-06 |
| Chr3 | 13112931 | 13114591 | 4  | 1661 | 4.33861E-06 |
| Chr3 | 13122499 | 13123773 | 4  | 1275 | 1.71634E-05 |
| Chr3 | 13150569 | 13151463 | 4  | 895  | 3.16E-07    |
| Chr3 | 13160008 | 13162274 | 6  | 2267 | 3.66E-11    |
| Chr3 | 13189672 | 13191972 | 7  | 2301 | 5.71E-10    |
| Chr3 | 13196176 | 13197341 | 6  | 1166 | 2.75E-07    |
| Chr3 | 13316736 | 13320420 | 7  | 3685 | 9.31E-09    |
| Chr3 | 13321828 | 13323204 | 4  | 1377 | 5.12301E-06 |
| Chr3 | 13361236 | 13364440 | 6  | 3205 | 6.02E-09    |
| Chr3 | 13366987 | 13368707 | 5  | 1721 | 6.11E-10    |
| Chr3 | 13406630 | 13406912 | 4  | 283  | 1.3403E-06  |
| Chr3 | 13410523 | 13412548 | 5  | 2026 | 1.97E-07    |
| Chr3 | 13423906 | 13425370 | 4  | 1465 | 3.82253E-06 |
| Chr3 | 13444148 | 13446292 | 7  | 2145 | 1.98567E-07 |
| Chr3 | 13467893 | 13469336 | 6  | 1444 | 1.30E-07    |
| Chr3 | 13476614 | 13477917 | 4  | 1304 | 1.03E-07    |
| Chr3 | 13587020 | 13587696 | 5  | 677  | 0.000555821 |
| Chr3 | 13588831 | 13592567 | 22 | 3737 | 5.01E-11    |
| Chr3 | 13604895 | 13606199 | 6  | 1305 | 2.10E-10    |
| Chr3 | 13616967 | 13619680 | 7  | 2714 | 3.85E-10    |
| Chr3 | 13645960 | 13647186 | 5  | 1227 | 6.33E-07    |
| Chr3 | 13648382 | 13649619 | 4  | 1238 | 2.00319E-06 |
| Chr3 | 13661035 | 13661536 | 4  | 502  | 2.50625E-05 |
| Chr3 | 13663080 | 13663565 | 5  | 486  | 5.19045E-06 |
| Chr3 | 13673381 | 13675687 | 6  | 2307 | 1.69E-08    |
| Chr3 | 13678014 | 13678719 | 5  | 706  | 4.58E-09    |
| Chr3 | 13801618 | 13802298 | 4  | 681  | 2.13932E-05 |
| Chr3 | 13813502 | 13816425 | 7  | 2924 | 1.29E-11    |
| Chr3 | 13872340 | 13873295 | 5  | 956  | 8.17178E-06 |
| Chr3 | 13879598 | 13879876 | 5  | 279  | 2.79E-07    |
| Chr3 | 13887649 | 13888580 | 4  | 932  | 1.0332E-05  |
| Chr3 | 13893175 | 13894425 | 6  | 1251 | 1.81E-09    |
| Chr3 | 13909858 | 13911641 | 4  | 1784 | 1.27099E-05 |
| Chr3 | 13950479 | 13951509 | 5  | 1031 | 4.66E-08    |
| Chr3 | 13979523 | 13980866 | 4  | 1344 | 1.05044E-06 |
| Chr3 | 14005725 | 14006847 | 7  | 1123 | 3.74689E-07 |
| Chr3 | 14009031 | 14009305 | 4  | 275  | 1.01E-07    |
| Chr3 | 14116393 | 14117244 | 4  | 852  | 2.84186E-05 |
| Chr3 | 14194883 | 14198373 | 17 | 3491 | 6.84E-10    |
| Chr3 | 14199603 | 14199988 | 4  | 386  | 6.97E-07    |
| Chr3 | 14203000 | 14204013 | 10 | 1014 | 3.72E-18    |
| Chr3 | 14206919 | 14208858 | 9  | 1940 | 1.31739E-06 |
| Chr3 | 14212517 | 14212730 | 5  | 214  | 0.004716606 |
| Chr3 | 14213929 | 14216439 | 7  | 2511 | 2.38E-10    |
| Chr3 | 14223171 | 14224129 | 9  | 959  | 2.72556E-06 |

|      |          |          |   |      |             |
|------|----------|----------|---|------|-------------|
| Chr3 | 14246959 | 14250014 | 6 | 3056 | 2.71593E-06 |
| Chr3 | 14330575 | 14331787 | 4 | 1213 | 9.99E-08    |
| Chr3 | 14431389 | 14434952 | 6 | 3564 | 1.12E-08    |
| Chr3 | 14504715 | 14506132 | 4 | 1418 | 3.93361E-06 |
| Chr3 | 14529171 | 14530701 | 4 | 1531 | 2.1765E-05  |
| Chr3 | 14552389 | 14554624 | 7 | 2236 | 2.15E-10    |
| Chr3 | 14556254 | 14557112 | 4 | 859  | 6.50411E-05 |
| Chr3 | 14619987 | 14621657 | 6 | 1671 | 1.17E-07    |
| Chr3 | 14633289 | 14635327 | 5 | 2039 | 4.35E-07    |
| Chr3 | 14657288 | 14658191 | 4 | 904  | 1.2122E-05  |
| Chr3 | 14729930 | 14731688 | 7 | 1759 | 1.93E-10    |
| Chr3 | 14796558 | 14798096 | 6 | 1539 | 2.91E-08    |
| Chr3 | 14820174 | 14823067 | 6 | 2894 | 2.34E-08    |
| Chr3 | 14824426 | 14827122 | 6 | 2697 | 9.84359E-07 |
| Chr3 | 14954677 | 14955557 | 4 | 881  | 7.04403E-06 |
| Chr3 | 14977526 | 14978593 | 4 | 1068 | 3.71971E-05 |
| Chr3 | 14997540 | 14998438 | 4 | 899  | 4.21E-07    |
| Chr3 | 15032469 | 15033476 | 5 | 1008 | 1.74E-07    |
| Chr3 | 15045749 | 15046865 | 4 | 1117 | 7.1068E-07  |
| Chr3 | 15101630 | 15103123 | 4 | 1494 | 1.34724E-05 |
| Chr3 | 15119675 | 15122758 | 9 | 3084 | 2.26E-12    |
| Chr3 | 15147159 | 15148837 | 6 | 1679 | 1.51E-09    |
| Chr3 | 15248835 | 15250641 | 4 | 1807 | 1.27966E-05 |
| Chr3 | 15257615 | 15258117 | 8 | 503  | 1.22E-10    |
| Chr3 | 15261045 | 15261935 | 4 | 891  | 5.15865E-07 |
| Chr3 | 15327100 | 15328151 | 4 | 1052 | 6.15E-07    |
| Chr3 | 15379379 | 15380124 | 5 | 746  | 9.72E-07    |
| Chr3 | 15422633 | 15424612 | 4 | 1980 | 8.34E-07    |
| Chr3 | 15489825 | 15492003 | 4 | 2179 | 4.28E-08    |
| Chr3 | 15540970 | 15543403 | 5 | 2434 | 1.65966E-07 |
| Chr3 | 15591638 | 15593714 | 4 | 2077 | 0.000430403 |
| Chr3 | 15716030 | 15717440 | 8 | 1411 | 5.89E-09    |
| Chr3 | 16691988 | 16693105 | 4 | 1118 | 0.000532208 |
| Chr3 | 18792205 | 18794297 | 5 | 2093 | 2.34394E-06 |
| Chr3 | 22233097 | 22234436 | 4 | 1340 | 1.32E-08    |
| Chr3 | 23108975 | 23110240 | 4 | 1266 | 1.13207E-06 |
| Chr4 | 632097   | 635880   | 9 | 3784 | 1.91E-12    |
| Chr4 | 655207   | 655943   | 4 | 737  | 4.62836E-06 |
| Chr4 | 1097945  | 1099690  | 5 | 1746 | 6.37E-07    |
| Chr4 | 1668208  | 1670162  | 5 | 1955 | 1.04769E-05 |
| Chr4 | 1689339  | 1690339  | 9 | 1001 | 9.10E-11    |
| Chr4 | 1764802  | 1766616  | 5 | 1815 | 1.17659E-07 |
| Chr4 | 1807830  | 1809410  | 4 | 1581 | 5.99E-07    |
| Chr4 | 1827824  | 1828634  | 4 | 811  | 2.19741E-06 |
| Chr4 | 1858329  | 1859422  | 5 | 1094 | 3.79E-10    |
| Chr4 | 1945158  | 1946674  | 7 | 1517 | 1.03E-07    |
| Chr4 | 1950589  | 1953491  | 7 | 2903 | 2.61E-10    |
| Chr4 | 1969458  | 1970996  | 6 | 1539 | 1.81E-08    |
| Chr4 | 2043898  | 2044660  | 6 | 763  | 4.40E-09    |
| Chr4 | 2159581  | 2161265  | 4 | 1685 | 2.34352E-06 |
| Chr4 | 2195393  | 2198151  | 6 | 2759 | 1.35649E-05 |
| Chr4 | 2245732  | 2247821  | 5 | 2090 | 7.88E-08    |
| Chr4 | 2281047  | 2283242  | 5 | 2196 | 1.78684E-06 |
| Chr4 | 2643699  | 2644120  | 4 | 422  | 1.48262E-05 |
| Chr4 | 2645159  | 2647255  | 4 | 2097 | 6.64E-07    |
| Chr4 | 2830896  | 2833040  | 6 | 2145 | 4.17E-09    |
| Chr4 | 2882963  | 2886834  | 8 | 3872 | 2.32E-11    |
| Chr4 | 2910953  | 2912120  | 6 | 1168 | 8.29971E-06 |
| Chr4 | 2915449  | 2916545  | 5 | 1097 | 0.000134229 |
| Chr4 | 2974229  | 2975970  | 6 | 1742 | 1.45E-08    |
| Chr4 | 3005154  | 3006341  | 4 | 1188 | 5.04E-07    |
| Chr4 | 3015514  | 3016902  | 4 | 1389 | 8.0723E-06  |
| Chr4 | 3031416  | 3034214  | 7 | 2799 | 9.05E-07    |

|      |         |         |    |      |             |
|------|---------|---------|----|------|-------------|
| Chr4 | 3037107 | 3038081 | 4  | 975  | 3.92864E-05 |
| Chr4 | 3061041 | 3062277 | 4  | 1237 | 2.87465E-06 |
| Chr4 | 3067407 | 3069792 | 5  | 2386 | 8.04139E-06 |
| Chr4 | 3092236 | 3093572 | 7  | 1337 | 4.67E-11    |
| Chr4 | 3180224 | 3183348 | 8  | 3125 | 6.09E-11    |
| Chr4 | 3189067 | 3190532 | 4  | 1466 | 2.77581E-05 |
| Chr4 | 3264901 | 3266191 | 5  | 1291 | 2.30E-07    |
| Chr4 | 3287227 | 3288901 | 4  | 1675 | 3.18033E-06 |
| Chr4 | 3318365 | 3319223 | 6  | 859  | 1.23287E-07 |
| Chr4 | 3375123 | 3376488 | 4  | 1366 | 0.000231128 |
| Chr4 | 3397499 | 3398545 | 6  | 1047 | 2.10084E-06 |
| Chr4 | 3401290 | 3403433 | 6  | 2144 | 3.85E-08    |
| Chr4 | 3408698 | 3409374 | 4  | 677  | 2.42834E-06 |
| Chr4 | 3411127 | 3411975 | 4  | 849  | 0.000906672 |
| Chr4 | 3457981 | 3459088 | 4  | 1108 | 6.05E-08    |
| Chr4 | 3461772 | 3461999 | 4  | 228  | 1.1542E-06  |
| Chr4 | 3468608 | 3470062 | 6  | 1455 | 2.40367E-05 |
| Chr4 | 3495224 | 3496865 | 6  | 1642 | 4.58E-10    |
| Chr4 | 3568801 | 3570301 | 6  | 1501 | 4.20759E-07 |
| Chr4 | 3580869 | 3584534 | 9  | 3666 | 4.13E-09    |
| Chr4 | 3585620 | 3588977 | 7  | 3358 | 3.33E-10    |
| Chr4 | 3594955 | 3595542 | 4  | 588  | 1.32107E-05 |
| Chr4 | 3596577 | 3598202 | 5  | 1626 | 1.87E-07    |
| Chr4 | 3626845 | 3627924 | 5  | 1080 | 7.10516E-06 |
| Chr4 | 3676525 | 3677469 | 5  | 945  | 7.0913E-07  |
| Chr4 | 3693750 | 3694575 | 6  | 826  | 1.67E-10    |
| Chr4 | 3706658 | 3708708 | 8  | 2051 | 2.22E-10    |
| Chr4 | 3744975 | 3747837 | 5  | 2863 | 3.62598E-06 |
| Chr4 | 3756785 | 3758270 | 4  | 1486 | 1.32752E-06 |
| Chr4 | 3782128 | 3782680 | 4  | 553  | 7.09E-07    |
| Chr4 | 3786816 | 3787700 | 4  | 885  | 8.07E-07    |
| Chr4 | 3796930 | 3797777 | 4  | 848  | 9.40681E-05 |
| Chr4 | 3878787 | 3880281 | 4  | 1495 | 1.94875E-06 |
| Chr4 | 3881499 | 3883376 | 4  | 1878 | 1.30233E-06 |
| Chr4 | 3931849 | 3934278 | 6  | 2430 | 1.45E-07    |
| Chr4 | 3947779 | 3948278 | 4  | 500  | 6.38E-07    |
| Chr4 | 3950612 | 3953717 | 26 | 3106 | 4.12E-30    |
| Chr4 | 3954748 | 3955925 | 4  | 1178 | 4.54E-07    |
| Chr4 | 3963594 | 3966645 | 11 | 3052 | 2.44917E-06 |
| Chr4 | 3977729 | 3979632 | 7  | 1904 | 0.00148965  |
| Chr4 | 3992710 | 3996755 | 17 | 4046 | 9.01E-15    |
| Chr4 | 4029383 | 4030359 | 4  | 977  | 4.28505E-05 |
| Chr4 | 4181697 | 4185386 | 7  | 3690 | 1.20E-08    |
| Chr4 | 4240741 | 4243753 | 8  | 3013 | 1.07E-13    |
| Chr4 | 4307143 | 4307951 | 4  | 809  | 0.000119233 |
| Chr4 | 4365406 | 4366548 | 5  | 1143 | 2.19744E-05 |
| Chr4 | 4388680 | 4390421 | 4  | 1742 | 1.05914E-05 |
| Chr4 | 4392919 | 4394903 | 8  | 1985 | 3.72E-07    |
| Chr4 | 4409558 | 4411917 | 8  | 2360 | 6.05E-12    |
| Chr4 | 4432950 | 4434343 | 4  | 1394 | 4.17697E-05 |
| Chr4 | 4438461 | 4440025 | 4  | 1565 | 2.53E-07    |
| Chr4 | 4489994 | 4490174 | 4  | 181  | 1.73E-07    |
| Chr4 | 4491356 | 4492825 | 4  | 1470 | 0.000348197 |
| Chr4 | 4528486 | 4530467 | 4  | 1982 | 1.17682E-06 |
| Chr4 | 4599532 | 4601296 | 5  | 1765 | 2.26E-07    |
| Chr4 | 4701485 | 4702062 | 4  | 578  | 5.72676E-06 |
| Chr4 | 4704313 | 4705602 | 5  | 1290 | 6.72E-07    |
| Chr4 | 4711076 | 4712998 | 4  | 1923 | 3.44337E-05 |
| Chr4 | 4752593 | 4754055 | 6  | 1463 | 4.50E-10    |
| Chr4 | 4760577 | 4761369 | 4  | 793  | 2.64E-07    |
| Chr4 | 4778663 | 4779517 | 5  | 855  | 0.000166908 |
| Chr4 | 4900256 | 4902906 | 4  | 2651 | 3.19378E-06 |
| Chr4 | 4959193 | 4961504 | 7  | 2312 | 2.12E-09    |



|      |          |          |    |      |             |
|------|----------|----------|----|------|-------------|
| Chr4 | 4965560  | 4968442  | 7  | 2883 | 5.26E-09    |
| Chr4 | 4982747  | 4983299  | 6  | 553  | 5.03E-09    |
| Chr4 | 5015101  | 5016225  | 4  | 1125 | 9.06E-08    |
| Chr4 | 5023205  | 5025576  | 5  | 2372 | 7.11E-08    |
| Chr4 | 5041629  | 5043142  | 5  | 1514 | 8.45635E-06 |
| Chr4 | 5049354  | 5050720  | 5  | 1367 | 6.81871E-05 |
| Chr4 | 5055109  | 5055972  | 7  | 864  | 3.44E-09    |
| Chr4 | 5058508  | 5060870  | 6  | 2363 | 1.73E-10    |
| Chr4 | 5076736  | 5078032  | 4  | 1297 | 1.41042E-06 |
| Chr4 | 5080790  | 5081496  | 4  | 707  | 1.408E-05   |
| Chr4 | 5307042  | 5308827  | 6  | 1786 | 1.23E-07    |
| Chr4 | 5941456  | 5943178  | 4  | 1723 | 1.77621E-05 |
| Chr4 | 6131370  | 6132155  | 4  | 786  | 6.47537E-05 |
| Chr4 | 6332404  | 6333233  | 4  | 830  | 2.17659E-05 |
| Chr4 | 6917152  | 6918424  | 4  | 1273 | 2.3181E-05  |
| Chr4 | 8318205  | 8318677  | 6  | 473  | 6.28E-10    |
| Chr4 | 9489100  | 9489837  | 4  | 738  | 2.69525E-06 |
| Chr4 | 9733111  | 9734294  | 5  | 1184 | 2.57E-07    |
| Chr4 | 10993713 | 10995146 | 5  | 1434 | 6.61642E-06 |
| Chr4 | 11366136 | 11366841 | 4  | 706  | 7.40E-07    |
| Chr4 | 13329274 | 13330468 | 6  | 1195 | 4.15E-08    |
| Chr4 | 13628045 | 13629303 | 4  | 1259 | 6.16456E-06 |
| Chr5 | 136671   | 138020   | 4  | 1350 | 7.89E-08    |
| Chr5 | 2260550  | 2262472  | 4  | 1923 | 0.000131935 |
| Chr5 | 4320868  | 4324850  | 9  | 3983 | 2.52E-09    |
| Chr5 | 7037180  | 7038845  | 5  | 1666 | 1.02E-08    |
| Chr5 | 8573987  | 8574967  | 4  | 981  | 2.10491E-06 |
| Chr5 | 9093185  | 9094174  | 4  | 990  | 4.70E-08    |
| Chr5 | 9183147  | 9185799  | 7  | 2653 | 1.20E-08    |
| Chr5 | 9413560  | 9415073  | 5  | 1514 | 5.49296E-06 |
| Chr5 | 9564752  | 9568438  | 8  | 3687 | 1.81E-11    |
| Chr5 | 9892884  | 9894395  | 4  | 1512 | 2.1852E-06  |
| Chr5 | 9906758  | 9907966  | 4  | 1209 | 4.09863E-05 |
| Chr5 | 9925343  | 9927482  | 7  | 2140 | 7.91E-09    |
| Chr5 | 9982586  | 9983423  | 4  | 838  | 1.55421E-05 |
| Chr5 | 10054483 | 10056222 | 4  | 1740 | 8.11789E-06 |
| Chr5 | 10157532 | 10158164 | 4  | 633  | 4.87664E-06 |
| Chr5 | 10352097 | 10353580 | 5  | 1484 | 1.25E-09    |
| Chr5 | 10359950 | 10362762 | 11 | 2813 | 3.52E-12    |
| Chr5 | 10364658 | 10365303 | 4  | 646  | 3.67E-08    |
| Chr5 | 10577045 | 10578326 | 4  | 1282 | 9.84957E-07 |
| Chr5 | 10624307 | 10626545 | 5  | 2239 | 4.0695E-05  |
| Chr5 | 10729323 | 10729896 | 4  | 574  | 4.89593E-07 |
| Chr5 | 10739635 | 10741850 | 4  | 2216 | 6.8267E-05  |
| Chr5 | 10972104 | 10972800 | 4  | 697  | 1.33E-07    |
| Chr5 | 11056169 | 11057824 | 5  | 1656 | 4.30893E-06 |
| Chr5 | 11082049 | 11083114 | 5  | 1066 | 5.15E-08    |
| Chr5 | 11087736 | 11089308 | 5  | 1573 | 2.45951E-06 |
| Chr5 | 11101038 | 11103159 | 4  | 2122 | 1.3363E-05  |
| Chr5 | 11139512 | 11141039 | 4  | 1528 | 2.58435E-05 |
| Chr5 | 11151189 | 11153526 | 7  | 2338 | 2.71E-09    |
| Chr5 | 11181307 | 11183651 | 7  | 2345 | 6.67891E-05 |
| Chr5 | 11185246 | 11186349 | 4  | 1104 | 0.061883927 |
| Chr5 | 11188360 | 11188740 | 9  | 381  | 7.77511E-06 |
| Chr5 | 11208938 | 11209178 | 4  | 241  | 9.81E-07    |
| Chr5 | 11211547 | 11212919 | 11 | 1373 | 3.69E-12    |
| Chr5 | 11347620 | 11350364 | 7  | 2745 | 1.54E-09    |
| Chr5 | 11352033 | 11353255 | 7  | 1223 | 1.00781E-07 |
| Chr5 | 11355255 | 11356966 | 4  | 1712 | 3.56386E-05 |
| Chr5 | 11358844 | 11359904 | 4  | 1061 | 1.01438E-06 |
| Chr5 | 11369196 | 11369973 | 5  | 778  | 2.15568E-06 |
| Chr5 | 11402694 | 11403196 | 4  | 503  | 1.859E-05   |
| Chr5 | 11410187 | 11414390 | 8  | 4204 | 1.93E-09    |

|      |          |          |    |      |             |
|------|----------|----------|----|------|-------------|
| Chr5 | 11429402 | 11430161 | 5  | 760  | 8.04E-07    |
| Chr5 | 11529652 | 11530645 | 4  | 994  | 5.69008E-06 |
| Chr5 | 11549272 | 11549829 | 4  | 558  | 9.04791E-06 |
| Chr5 | 11589490 | 11590864 | 5  | 1375 | 1.31E-08    |
| Chr5 | 11593121 | 11594393 | 4  | 1273 | 4.28585E-05 |
| Chr5 | 11703087 | 11703692 | 5  | 606  | 2.45304E-06 |
| Chr5 | 11704745 | 11708854 | 12 | 4110 | 1.30E-07    |
| Chr5 | 11722642 | 11724812 | 8  | 2171 | 4.19E-07    |
| Chr5 | 11727456 | 11731445 | 12 | 3990 | 0.478063695 |
| Chr5 | 11735268 | 11736342 | 6  | 1075 | 7.05E-10    |
| Chr5 | 11749554 | 11751320 | 5  | 1767 | 6.05E-07    |
| Chr5 | 11773797 | 11774988 | 4  | 1192 | 1.52191E-05 |
| Chr5 | 11787657 | 11788948 | 4  | 1292 | 2.9599E-06  |
| Chr5 | 11804831 | 11807446 | 5  | 2616 | 3.92E-07    |
| Chr5 | 11842610 | 11843429 | 4  | 820  | 5.17E-07    |
| Chr5 | 11908176 | 11909143 | 4  | 968  | 4.29715E-06 |
| Chr5 | 11910237 | 11912171 | 4  | 1935 | 4.63661E-06 |
| Chr5 | 11918662 | 11922210 | 7  | 3549 | 3.64E-09    |
| Chr5 | 11923421 | 11923967 | 4  | 547  | 3.85E-07    |
| Chr5 | 11936602 | 11939872 | 24 | 3271 | 1.08E-22    |
| Chr5 | 11941321 | 11942680 | 10 | 1360 | 4.18E-13    |
| Chr5 | 11980009 | 11980609 | 4  | 601  | 1.18068E-06 |
| Chr5 | 11984673 | 11987458 | 12 | 2786 | 2.51E-14    |
| Chr5 | 11997692 | 11999126 | 6  | 1435 | 1.78E-09    |
| Chr5 | 12008215 | 12011177 | 10 | 2963 | 2.58E-13    |
| Chr5 | 12013512 | 12015101 | 5  | 1590 | 8.05E-09    |
| Chr5 | 12034696 | 12035206 | 5  | 511  | 4.68E-08    |
| Chr5 | 12040023 | 12041365 | 9  | 1343 | 6.18E-10    |
| Chr5 | 12102997 | 12104363 | 6  | 1367 | 1.21692E-06 |
| Chr5 | 12124711 | 12126592 | 7  | 1882 | 3.73E-10    |
| Chr5 | 12130495 | 12133315 | 10 | 2821 | 3.75E-10    |
| Chr5 | 12155645 | 12156186 | 4  | 542  | 8.22E-07    |
| Chr5 | 12158737 | 12160436 | 6  | 1700 | 3.25E-08    |
| Chr5 | 12166679 | 12168459 | 4  | 1781 | 9.50601E-05 |
| Chr5 | 12174932 | 12175488 | 5  | 557  | 2.00E-07    |
| Chr5 | 12213328 | 12215854 | 5  | 2527 | 9.66E-08    |
| Chr5 | 12222743 | 12223779 | 4  | 1037 | 1.04E-07    |
| Chr5 | 12233191 | 12236588 | 11 | 3398 | 1.41E-15    |
| Chr5 | 12237870 | 12239916 | 7  | 2047 | 5.06E-09    |
| Chr5 | 12242824 | 12244418 | 6  | 1595 | 1.24E-08    |
| Chr5 | 12255097 | 12256290 | 5  | 1194 | 2.10E-07    |
| Chr5 | 12290697 | 12292383 | 4  | 1687 | 4.68434E-06 |
| Chr5 | 12319420 | 12320849 | 4  | 1430 | 4.08E-07    |
| Chr5 | 12340512 | 12341867 | 4  | 1356 | 5.93926E-06 |
| Chr5 | 12347728 | 12348766 | 5  | 1039 | 3.27783E-06 |
| Chr5 | 12366632 | 12367522 | 4  | 891  | 7.27265E-06 |
| Chr5 | 12398893 | 12399412 | 6  | 520  | 2.96E-07    |
| Chr5 | 12406830 | 12408688 | 5  | 1859 | 7.51E-08    |
| Chr5 | 12427465 | 12428913 | 5  | 1449 | 2.25172E-05 |
| Chr5 | 12460700 | 12462618 | 4  | 1919 | 9.99E-07    |
| Chr5 | 12471081 | 12475623 | 11 | 4543 | 8.54E-16    |
| Chr5 | 12515059 | 12517525 | 8  | 2467 | 3.16E-11    |
| Chr5 | 12612518 | 12612562 | 4  | 45   | 4.07006E-06 |
| Chr5 | 12633409 | 12634037 | 4  | 629  | 1.95069E-05 |
| Chr5 | 12640645 | 12642060 | 5  | 1416 | 4.18168E-05 |
| Chr5 | 12711232 | 12713598 | 4  | 2367 | 1.81078E-05 |
| Chr5 | 12715279 | 12716784 | 5  | 1506 | 1.26891E-05 |
| Chr5 | 12775046 | 12777551 | 9  | 2506 | 8.68E-11    |
| Chr5 | 12784496 | 12786153 | 5  | 1658 | 1.73E-08    |
| Chr5 | 12792796 | 12795160 | 6  | 2365 | 1.79916E-07 |
| Chr5 | 12916904 | 12917716 | 4  | 813  | 2.3333E-05  |
| Chr5 | 12948010 | 12949475 | 6  | 1466 | 4.7124E-07  |
| Chr5 | 12954953 | 12956287 | 4  | 1335 | 3.25E-07    |

|      |          |          |   |      |             |
|------|----------|----------|---|------|-------------|
| Chr5 | 12969539 | 12971052 | 4 | 1514 | 1.31392E-06 |
| Chr5 | 12972522 | 12974071 | 4 | 1550 | 0.000133768 |
| Chr5 | 13015805 | 13017399 | 4 | 1595 | 2.90E-08    |
| Chr5 | 13030396 | 13032607 | 4 | 2212 | 0.009583002 |
| Chr5 | 13162147 | 13164562 | 5 | 2416 | 1.91E-11    |
| Chr5 | 13289417 | 13291553 | 4 | 2137 | 1.41706E-05 |
| Chr5 | 13326130 | 13327366 | 4 | 1237 | 1.50691E-06 |
| Chr5 | 13374902 | 13375798 | 4 | 897  | 3.37662E-06 |
| Chr5 | 13737041 | 13737869 | 4 | 829  | 1.59412E-05 |
| Chr5 | 13888151 | 13889914 | 4 | 1764 | 8.71E-07    |
| Chr5 | 14253440 | 14253624 | 5 | 185  | 2.27431E-05 |
| Chr5 | 14381687 | 14382502 | 5 | 816  | 1.56E-09    |
| Chr5 | 14576964 | 14578592 | 5 | 1629 | 1.57E-07    |
| Chr5 | 15637677 | 15638289 | 4 | 613  | 6.25098E-07 |
| Chr5 | 15646619 | 15648619 | 4 | 2001 | 0.000355547 |
| Chr5 | 15926072 | 15927262 | 6 | 1191 | 7.27E-09    |
| Chr5 | 16261249 | 16261405 | 4 | 157  | 6.60043E-05 |
| Chr5 | 17443006 | 17445388 | 5 | 2383 | 3.35706E-06 |
| Chr5 | 19361508 | 19362793 | 4 | 1286 | 2.01927E-05 |
| Chr5 | 21168967 | 21169614 | 5 | 648  | 1.54063E-06 |

**-Pit Shoot 16 dat (Hyper-DMRs)**

| Chromosome | Start    | End      | number of DMCs | DMR lenght | P-value     |
|------------|----------|----------|----------------|------------|-------------|
| Chr1       | 1211865  | 1212769  | 4              | 905        | 3.16E-09    |
| Chr1       | 4333119  | 4334436  | 4              | 1318       | 3.27554E-06 |
| Chr1       | 6590998  | 6593230  | 7              | 2233       | 4.30E-09    |
| Chr1       | 6658336  | 6659229  | 4              | 894        | 4.88896E-06 |
| Chr1       | 7358648  | 7360096  | 5              | 1449       | 0.000396044 |
| Chr1       | 7361145  | 7363508  | 5              | 2364       | 0.002797563 |
| Chr1       | 7430464  | 7431925  | 4              | 1462       | 3.36952E-05 |
| Chr1       | 8458478  | 8459555  | 4              | 1078       | 3.4937E-05  |
| Chr1       | 8644321  | 8645675  | 5              | 1355       | 1.24641E-06 |
| Chr1       | 8729113  | 8732424  | 12             | 3312       | 8.13E-19    |
| Chr1       | 8929448  | 8930630  | 4              | 1183       | 2.40066E-06 |
| Chr1       | 9686846  | 9687810  | 4              | 965        | 2.07579E-05 |
| Chr1       | 10359130 | 10361787 | 15             | 2658       | 3.36E-20    |
| Chr1       | 10697740 | 10700392 | 4              | 2653       | 2.55661E-05 |
| Chr1       | 11302930 | 11303224 | 4              | 295        | 3.62479E-05 |
| Chr1       | 11304842 | 11306271 | 5              | 1430       | 2.66E-08    |
| Chr1       | 11505076 | 11508096 | 6              | 3021       | 1.79E-07    |
| Chr1       | 12175592 | 12176336 | 4              | 745        | 2.05963E-05 |
| Chr1       | 12402715 | 12403421 | 4              | 707        | 0.000126042 |
| Chr1       | 12856230 | 12858099 | 7              | 1870       | 2.64E-09    |
| Chr1       | 12860890 | 12861146 | 4              | 257        | 9.42074E-06 |
| Chr1       | 13648345 | 13650503 | 4              | 2159       | 6.1722E-06  |
| Chr1       | 13830638 | 13832884 | 5              | 2247       | 2.57E-08    |
| Chr1       | 13885395 | 13887535 | 7              | 2141       | 1.96E-09    |
| Chr1       | 13956654 | 13957540 | 5              | 887        | 7.38E-08    |
| Chr1       | 14089816 | 14091031 | 5              | 1216       | 9.71E-07    |
| Chr1       | 14125700 | 14127674 | 5              | 1975       | 8.0478E-06  |
| Chr1       | 14228150 | 14229851 | 5              | 1702       | 3.1614E-06  |
| Chr1       | 14259288 | 14260219 | 4              | 932        | 3.80E-07    |
| Chr1       | 14261916 | 14264612 | 5              | 2697       | 3.80722E-07 |
| Chr1       | 14269356 | 14270030 | 6              | 675        | 4.15E-10    |
| Chr1       | 14324596 | 14325421 | 4              | 826        | 2.25171E-05 |
| Chr1       | 14493392 | 14496609 | 6              | 3218       | 5.48219E-06 |
| Chr1       | 14508655 | 14510103 | 5              | 1449       | 7.04E-08    |
| Chr1       | 14544849 | 14545558 | 5              | 710        | 3.06E-08    |
| Chr1       | 15081309 | 15085481 | 42             | 4173       | 2.41E-51    |
| Chr1       | 15436467 | 15440262 | 11             | 3796       | 1.82E-11    |
| Chr1       | 15492999 | 15493526 | 4              | 528        | 3.24054E-05 |
| Chr1       | 15497779 | 15500218 | 7              | 2440       | 1.53E-11    |

|      |          |          |      |        |             |
|------|----------|----------|------|--------|-------------|
| Chr1 | 15509514 | 15509657 | 4    | 144    | 7.54901E-06 |
| Chr1 | 15533717 | 15534935 | 6    | 1219   | 9.51E-09    |
| Chr1 | 15539772 | 15540663 | 6    | 892    | 3.52E-12    |
| Chr1 | 15697817 | 15699761 | 9    | 1945   | 7.58E-14    |
| Chr1 | 15707520 | 15708344 | 4    | 825    | 1.15818E-05 |
| Chr1 | 15802891 | 15804772 | 4    | 1882   | 2.34051E-05 |
| Chr1 | 16378674 | 16379995 | 4    | 1322   | 1.35147E-05 |
| Chr1 | 16513019 | 16514853 | 10   | 1835   | 2.46E-12    |
| Chr1 | 16526291 | 16530372 | 12   | 4082   | 7.39E-16    |
| Chr1 | 16632286 | 16634038 | 8    | 1753   | 1.67E-13    |
| Chr1 | 16635151 | 16636545 | 6    | 1395   | 8.83E-08    |
| Chr1 | 16674931 | 16676346 | 4    | 1416   | 1.24543E-05 |
| Chr1 | 16726910 | 16728426 | 4    | 1517   | 3.10479E-05 |
| Chr1 | 16732628 | 16733705 | 4    | 1078   | 1.29E-08    |
| Chr1 | 16959353 | 16961218 | 4    | 1866   | 2.37671E-05 |
| Chr1 | 17028098 | 17029748 | 5    | 1651   | 1.42E-07    |
| Chr1 | 17036106 | 17040220 | 9    | 4115   | 2.74E-09    |
| Chr1 | 17677306 | 17679249 | 4    | 1944   | 2.50895E-05 |
| Chr1 | 17680354 | 17681250 | 4    | 897    | 5.77409E-06 |
| Chr1 | 18158498 | 18159468 | 4    | 971    | 8.51E-08    |
| Chr1 | 18969049 | 18969760 | 4    | 712    | 7.87E-07    |
| Chr1 | 20086086 | 20087825 | 5    | 1740   | 2.53E-08    |
| Chr1 | 21751173 | 21751957 | 4    | 785    | 6.49208E-05 |
| Chr1 | 24272882 | 24275823 | 139  | 2942   | 2.21E-224   |
| Chr1 | 24526905 | 24528168 | 5    | 1264   | 6.89709E-06 |
| Chr1 | 26360727 | 26361120 | 6    | 394    | 1.34E-09    |
| Chr1 | 26371026 | 26371617 | 5    | 592    | 5.38E-09    |
| Chr2 | 1229     | 3722     | 84   | 2494   | 2.99E-177   |
| Chr2 | 5537     | 5981     | 14   | 445    | 6.02E-16    |
| Chr2 | 9594     | 10571    | 42   | 978    | 9.53E-70    |
| Chr2 | 39645    | 40088    | 6    | 444    | 3.13E-07    |
| Chr2 | 43405    | 44434    | 4    | 1030   | 3.98E-08    |
| Chr2 | 47118    | 48312    | 6    | 1195   | 3.71E-10    |
| Chr2 | 362455   | 362519   | 4    | 65     | 2.24764E-06 |
| Chr2 | 375292   | 375976   | 6    | 685    | 2.71746E-06 |
| Chr2 | 822876   | 824402   | 4    | 1527   | 9.55E-07    |
| Chr2 | 1263936  | 1263970  | 4    | 35     | 2.61864E-06 |
| Chr2 | 1548702  | 1549094  | 6    | 393    | 6.78E-12    |
| Chr2 | 1761941  | 1764376  | 5    | 2436   | 9.53E-08    |
| Chr2 | 2036017  | 2037702  | 5    | 1686   | 8.61E-07    |
| Chr2 | 2466794  | 2468172  | 4    | 1379   | 6.18E-07    |
| Chr2 | 2489981  | 2492334  | 5    | 2354   | 4.89E-08    |
| Chr2 | 2509896  | 2511048  | 4    | 1153   | 3.52509E-06 |
| Chr2 | 2708073  | 2709522  | 4    | 1450   | 5.37E-07    |
| Chr2 | 2805875  | 2807936  | 6    | 2062   | 2.65E-08    |
| Chr2 | 2832894  | 2834332  | 4    | 1439   | 2.13406E-05 |
| Chr2 | 3078385  | 3080276  | 4    | 1892   | 3.28586E-05 |
| Chr2 | 3087078  | 3088045  | 4    | 968    | 2.05076E-06 |
| Chr2 | 3097760  | 3098516  | 5    | 757    | 6.65E-07    |
| Chr2 | 3161107  | 3162245  | 5    | 1139   | 5.08033E-05 |
| Chr2 | 3163646  | 3166069  | 4    | 2424   | 6.74942E-06 |
| Chr2 | 3240754  | 3242210  | 74   | 1457   | 2.10E-139   |
| Chr2 | 3245294  | 3245499  | 14   | 206    | 7.33E-23    |
| Chr2 | 3247280  | 3367914  | 7284 | 120635 | 0           |
| Chr2 | 3375070  | 3379103  | 103  | 4034   | 1.13E-157   |
| Chr2 | 3381730  | 3382098  | 30   | 369    | 1.14E-69    |
| Chr2 | 3389197  | 3389545  | 6    | 349    | 4.80E-12    |
| Chr2 | 3393395  | 3400972  | 220  | 7578   | 0           |
| Chr2 | 3404754  | 3406630  | 29   | 1877   | 6.59E-49    |
| Chr2 | 3411078  | 3411276  | 5    | 199    | 1.34E-08    |
| Chr2 | 3412612  | 3412877  | 15   | 266    | 1.93E-21    |
| Chr2 | 3418590  | 3418799  | 16   | 210    | 5.21E-23    |
| Chr2 | 3428917  | 3429171  | 11   | 255    | 1.27E-22    |

|      |         |         |     |      |             |
|------|---------|---------|-----|------|-------------|
| Chr2 | 3431386 | 3431579 | 6   | 194  | 2.56E-08    |
| Chr2 | 3434012 | 3434416 | 13  | 405  | 2.38E-17    |
| Chr2 | 3438292 | 3439777 | 54  | 1486 | 5.77E-139   |
| Chr2 | 3447423 | 3447643 | 13  | 221  | 5.24E-23    |
| Chr2 | 3451820 | 3452101 | 7   | 282  | 9.19E-11    |
| Chr2 | 3453832 | 3454208 | 12  | 377  | 6.88E-21    |
| Chr2 | 3455789 | 3456075 | 12  | 287  | 3.93E-19    |
| Chr2 | 3457914 | 3461256 | 81  | 3343 | 5.95E-165   |
| Chr2 | 3462992 | 3465642 | 52  | 2651 | 1.65E-116   |
| Chr2 | 3468270 | 3469482 | 26  | 1213 | 5.71E-46    |
| Chr2 | 3471459 | 3471655 | 10  | 197  | 2.44E-12    |
| Chr2 | 3474764 | 3476303 | 34  | 1540 | 1.02E-61    |
| Chr2 | 3478009 | 3478522 | 30  | 514  | 1.40E-63    |
| Chr2 | 3482443 | 3482674 | 5   | 232  | 7.12E-07    |
| Chr2 | 3483767 | 3485127 | 26  | 1361 | 1.06E-37    |
| Chr2 | 3486361 | 3487585 | 22  | 1225 | 1.83E-33    |
| Chr2 | 3488724 | 3493588 | 127 | 4865 | 9.15E-234   |
| Chr2 | 3495332 | 3502057 | 95  | 6726 | 4.13E-153   |
| Chr2 | 3509226 | 3509734 | 31  | 509  | 3.43E-49    |
| Chr2 | 3519665 | 3520673 | 4   | 1009 | 2.87999E-06 |
| Chr2 | 3547437 | 3549156 | 4   | 1720 | 4.93571E-05 |
| Chr2 | 3550866 | 3551789 | 5   | 924  | 0.000268106 |
| Chr2 | 3605800 | 3607322 | 19  | 1523 | 9.15E-21    |
| Chr2 | 3615092 | 3623604 | 91  | 8513 | 7.59E-80    |
| Chr2 | 3624611 | 3628052 | 39  | 3442 | 3.84E-55    |
| Chr2 | 3689138 | 3690266 | 4   | 1129 | 1.37262E-06 |
| Chr2 | 3830681 | 3831709 | 4   | 1029 | 1.76172E-06 |
| Chr2 | 3843434 | 3845009 | 4   | 1576 | 2.7452E-06  |
| Chr2 | 3859091 | 3861826 | 6   | 2736 | 9.22E-07    |
| Chr2 | 3871208 | 3872247 | 5   | 1040 | 1.18E-08    |
| Chr2 | 3877959 | 3880951 | 7   | 2993 | 1.01E-09    |
| Chr2 | 3922365 | 3923807 | 5   | 1443 | 1.57E-10    |
| Chr2 | 4054851 | 4056664 | 5   | 1814 | 7.69586E-06 |
| Chr2 | 4124726 | 4127009 | 4   | 2284 | 5.16E-08    |
| Chr2 | 4189661 | 4190381 | 4   | 721  | 1.1656E-06  |
| Chr2 | 4209044 | 4210227 | 4   | 1184 | 0.000189553 |
| Chr2 | 4236897 | 4240861 | 7   | 3965 | 8.05E-07    |
| Chr2 | 4311645 | 4311886 | 4   | 242  | 5.74553E-06 |
| Chr2 | 4387980 | 4389833 | 5   | 1854 | 9.06054E-05 |
| Chr2 | 4582050 | 4582618 | 4   | 569  | 2.41915E-05 |
| Chr2 | 4679232 | 4681674 | 5   | 2443 | 1.84E-08    |
| Chr2 | 4692227 | 4692828 | 4   | 602  | 3.35316E-06 |
| Chr2 | 4694879 | 4695639 | 5   | 761  | 7.87E-08    |
| Chr2 | 4710872 | 4714196 | 9   | 3325 | 7.57E-11    |
| Chr2 | 4722411 | 4723465 | 4   | 1055 | 9.04E-07    |
| Chr2 | 4726753 | 4728418 | 4   | 1666 | 0.000112574 |
| Chr2 | 4730551 | 4731361 | 4   | 811  | 3.65E-07    |
| Chr2 | 4733091 | 4736675 | 12  | 3585 | 5.76E-16    |
| Chr2 | 4739703 | 4740479 | 6   | 777  | 8.45E-10    |
| Chr2 | 4844008 | 4844137 | 14  | 130  | 1.99E-38    |
| Chr2 | 4897103 | 4898106 | 4   | 1004 | 1.41E-07    |
| Chr2 | 4977971 | 4979253 | 4   | 1283 | 5.46949E-05 |
| Chr2 | 4988167 | 4989925 | 4   | 1759 | 0.000127979 |
| Chr2 | 5085567 | 5087836 | 7   | 2270 | 7.16E-08    |
| Chr2 | 5104371 | 5106266 | 6   | 1896 | 3.12982E-06 |
| Chr2 | 5202794 | 5203795 | 4   | 1002 | 3.56921E-05 |
| Chr2 | 5209349 | 5210849 | 5   | 1501 | 2.70893E-06 |
| Chr2 | 5302571 | 5304457 | 4   | 1887 | 0.000136065 |
| Chr2 | 5310700 | 5310995 | 4   | 296  | 1.04624E-05 |
| Chr2 | 5333306 | 5335483 | 5   | 2178 | 4.86E-08    |
| Chr2 | 5371076 | 5372622 | 5   | 1547 | 2.73031E-06 |
| Chr2 | 5454656 | 5456286 | 4   | 1631 | 2.05E-07    |
| Chr2 | 5531399 | 5532163 | 4   | 765  | 2.98266E-05 |

|      |          |          |     |      |             |
|------|----------|----------|-----|------|-------------|
| Chr2 | 5810940  | 5813305  | 6   | 2366 | 9.92E-08    |
| Chr2 | 5847818  | 5848911  | 6   | 1094 | 2.85E-09    |
| Chr2 | 5880315  | 5882609  | 8   | 2295 | 1.40E-12    |
| Chr2 | 6112370  | 6113125  | 7   | 756  | 8.17E-11    |
| Chr2 | 6228694  | 6229819  | 7   | 1126 | 2.50E-09    |
| Chr2 | 6529782  | 6532075  | 6   | 2294 | 3.11E-07    |
| Chr2 | 6555167  | 6557019  | 5   | 1853 | 4.26E-07    |
| Chr2 | 6701109  | 6703432  | 5   | 2324 | 6.18E-07    |
| Chr2 | 6704564  | 6706677  | 6   | 2114 | 9.04E-09    |
| Chr2 | 6767033  | 6768924  | 4   | 1892 | 5.01824E-06 |
| Chr2 | 6971179  | 6972751  | 4   | 1573 | 5.22148E-06 |
| Chr2 | 7005780  | 7006904  | 5   | 1125 | 2.47E-07    |
| Chr2 | 7226083  | 7228723  | 6   | 2641 | 5.35E-07    |
| Chr2 | 8565071  | 8566532  | 6   | 1462 | 1.37856E-06 |
| Chr2 | 9122587  | 9125209  | 8   | 2623 | 1.31E-07    |
| Chr2 | 10001895 | 10003424 | 5   | 1530 | 1.68E-08    |
| Chr2 | 10592479 | 10593305 | 4   | 827  | 9.44841E-06 |
| Chr2 | 12450107 | 12451254 | 4   | 1148 | 1.25E-09    |
| Chr2 | 12810650 | 12810774 | 4   | 125  | 5.89166E-06 |
| Chr2 | 18651868 | 18654517 | 6   | 2650 | 3.10452E-07 |
| Chr3 | 2809255  | 2810716  | 6   | 1462 | 6.17E-10    |
| Chr3 | 5278527  | 5280623  | 7   | 2097 | 3.89E-07    |
| Chr3 | 6275067  | 6275585  | 4   | 519  | 7.32E-10    |
| Chr3 | 7104162  | 7104241  | 4   | 80   | 7.58E-08    |
| Chr3 | 8537525  | 8538225  | 4   | 701  | 1.94385E-06 |
| Chr3 | 9016237  | 9016985  | 4   | 749  | 1.44253E-05 |
| Chr3 | 9239060  | 9240694  | 6   | 1635 | 3.19E-10    |
| Chr3 | 9695345  | 9697373  | 6   | 2029 | 1.25E-07    |
| Chr3 | 9785700  | 9788265  | 6   | 2566 | 1.01E-09    |
| Chr3 | 10339890 | 10341737 | 8   | 1848 | 1.60E-09    |
| Chr3 | 10342788 | 10345250 | 7   | 2463 | 3.39E-10    |
| Chr3 | 10480437 | 10481801 | 4   | 1365 | 1.87058E-05 |
| Chr3 | 10970345 | 10972925 | 7   | 2581 | 4.75E-08    |
| Chr3 | 11056579 | 11056866 | 4   | 288  | 5.57E-07    |
| Chr3 | 11495282 | 11496681 | 4   | 1400 | 3.22E-07    |
| Chr3 | 11687506 | 11688265 | 4   | 760  | 3.1036E-06  |
| Chr3 | 11872172 | 11874053 | 6   | 1882 | 8.58E-09    |
| Chr3 | 12033083 | 12035210 | 5   | 2128 | 2.68E-07    |
| Chr3 | 12068888 | 12069892 | 4   | 1005 | 3.51E-08    |
| Chr3 | 12194790 | 12195473 | 4   | 684  | 8.48251E-07 |
| Chr3 | 12222725 | 12223696 | 4   | 972  | 1.70E-07    |
| Chr3 | 12288905 | 12291223 | 5   | 2319 | 5.47E-07    |
| Chr3 | 12306034 | 12307899 | 4   | 1866 | 1.54802E-06 |
| Chr3 | 12402654 | 12403438 | 4   | 785  | 0.000163995 |
| Chr3 | 12404559 | 12405624 | 4   | 1066 | 4.47E-07    |
| Chr3 | 12500587 | 12502218 | 6   | 1632 | 3.28E-08    |
| Chr3 | 12544974 | 12545519 | 4   | 546  | 1.98E-08    |
| Chr3 | 12952065 | 12954026 | 4   | 1962 | 7.64005E-06 |
| Chr3 | 12986005 | 12987851 | 5   | 1847 | 8.21E-07    |
| Chr3 | 13117459 | 13119461 | 7   | 2003 | 4.39E-08    |
| Chr3 | 13160738 | 13161397 | 4   | 660  | 6.10E-09    |
| Chr3 | 13191522 | 13192440 | 4   | 919  | 6.87E-09    |
| Chr3 | 13407713 | 13410462 | 5   | 2750 | 9.15E-08    |
| Chr3 | 13414722 | 13417379 | 4   | 2658 | 1.06209E-06 |
| Chr3 | 13447925 | 13448672 | 6   | 748  | 1.33E-09    |
| Chr3 | 13587086 | 13587773 | 13  | 688  | 7.01E-26    |
| Chr3 | 13588800 | 13592495 | 125 | 3696 | 3.62E-178   |
| Chr3 | 13630848 | 13633664 | 6   | 2817 | 2.39817E-06 |
| Chr3 | 13641556 | 13643741 | 5   | 2186 | 1.99E-07    |
| Chr3 | 13801985 | 13804385 | 5   | 2401 | 6.94E-07    |
| Chr3 | 13809357 | 13811115 | 4   | 1759 | 3.02464E-06 |
| Chr3 | 13821085 | 13822606 | 5   | 1522 | 6.33E-10    |
| Chr3 | 13877366 | 13879041 | 5   | 1676 | 1.26718E-06 |

|      |          |          |     |      |             |
|------|----------|----------|-----|------|-------------|
| Chr3 | 13889137 | 13891666 | 6   | 2530 | 3.36E-08    |
| Chr3 | 13894569 | 13898018 | 6   | 3450 | 3.44E-09    |
| Chr3 | 13909054 | 13909907 | 4   | 854  | 1.36826E-06 |
| Chr3 | 13951119 | 13953397 | 7   | 2279 | 5.60E-11    |
| Chr3 | 14033235 | 14033477 | 5   | 243  | 1.78E-07    |
| Chr3 | 14106499 | 14108458 | 4   | 1960 | 4.31477E-05 |
| Chr3 | 14162519 | 14163791 | 4   | 1273 | 4.72E-07    |
| Chr3 | 14165593 | 14167815 | 7   | 2223 | 8.10E-10    |
| Chr3 | 14194635 | 14197485 | 111 | 2851 | 1.38E-120   |
| Chr3 | 14199391 | 14204031 | 127 | 4641 | 3.39E-216   |
| Chr3 | 14236414 | 14238269 | 7   | 1856 | 3.79E-12    |
| Chr3 | 14249075 | 14249483 | 4   | 409  | 1.39603E-06 |
| Chr3 | 14256311 | 14257635 | 6   | 1325 | 6.94E-07    |
| Chr3 | 14391870 | 14393453 | 4   | 1584 | 0.000190138 |
| Chr3 | 14409890 | 14411814 | 4   | 1925 | 4.79082E-05 |
| Chr3 | 14431934 | 14434176 | 6   | 2243 | 4.63E-07    |
| Chr3 | 14638614 | 14640046 | 4   | 1433 | 2.71165E-05 |
| Chr3 | 15043420 | 15044634 | 5   | 1215 | 7.84E-08    |
| Chr3 | 15137943 | 15138863 | 4   | 921  | 1.12703E-05 |
| Chr3 | 15143903 | 15146269 | 5   | 2367 | 2.61E-08    |
| Chr3 | 15154775 | 15155053 | 4   | 279  | 1.97161E-06 |
| Chr3 | 15229831 | 15230546 | 4   | 716  | 2.73322E-05 |
| Chr3 | 15255680 | 15257011 | 6   | 1332 | 1.17E-10    |
| Chr3 | 15309306 | 15311894 | 9   | 2589 | 1.73E-14    |
| Chr3 | 15374980 | 15377230 | 5   | 2251 | 1.14E-09    |
| Chr3 | 15535989 | 15537784 | 5   | 1796 | 4.95E-08    |
| Chr3 | 15543431 | 15544426 | 4   | 996  | 1.65344E-06 |
| Chr3 | 15574854 | 15576492 | 5   | 1639 | 1.66693E-06 |
| Chr3 | 15584317 | 15587651 | 13  | 3335 | 3.92E-16    |
| Chr3 | 15719293 | 15719986 | 5   | 694  | 6.12092E-06 |
| Chr3 | 15724081 | 15726173 | 6   | 2093 | 2.23E-08    |
| Chr3 | 15922924 | 15923895 | 4   | 972  | 2.14477E-05 |
| Chr3 | 16641811 | 16642856 | 4   | 1046 | 8.63525E-06 |
| Chr3 | 20308994 | 20309351 | 4   | 358  | 0.000134826 |
| Chr3 | 21322737 | 21324425 | 9   | 1689 | 1.23E-10    |
| Chr3 | 23110014 | 23110960 | 4   | 947  | 0.00014976  |
| Chr4 | 413752   | 414314   | 11  | 563  | 9.39E-16    |
| Chr4 | 635857   | 636858   | 5   | 1002 | 3.48E-07    |
| Chr4 | 1675143  | 1678403  | 5   | 3261 | 1.62E-09    |
| Chr4 | 1826172  | 1827540  | 6   | 1369 | 9.11E-10    |
| Chr4 | 1829523  | 1830693  | 4   | 1171 | 4.31E-07    |
| Chr4 | 1936988  | 1937710  | 4   | 723  | 1.79217E-05 |
| Chr4 | 1951043  | 1953009  | 6   | 1967 | 1.17E-08    |
| Chr4 | 1990373  | 1992090  | 4   | 1718 | 1.04E-07    |
| Chr4 | 2016083  | 2018030  | 7   | 1948 | 6.04E-08    |
| Chr4 | 2195315  | 2196596  | 5   | 1282 | 3.44585E-05 |
| Chr4 | 2200091  | 2203086  | 8   | 2996 | 8.60E-13    |
| Chr4 | 2212736  | 2213994  | 6   | 1259 | 3.56E-10    |
| Chr4 | 2275292  | 2276284  | 6   | 993  | 3.63E-07    |
| Chr4 | 2280437  | 2285735  | 13  | 5299 | 1.10E-16    |
| Chr4 | 2287731  | 2288334  | 4   | 604  | 0.000400844 |
| Chr4 | 2304930  | 2305859  | 4   | 930  | 5.97797E-06 |
| Chr4 | 2597477  | 2598559  | 4   | 1083 | 0.000964097 |
| Chr4 | 2707085  | 2708753  | 5   | 1669 | 2.79434E-06 |
| Chr4 | 2857089  | 2858356  | 4   | 1268 | 2.50E-07    |
| Chr4 | 3019567  | 3020997  | 6   | 1431 | 1.69E-08    |
| Chr4 | 3071284  | 3072522  | 5   | 1239 | 2.09223E-05 |
| Chr4 | 3078674  | 3080446  | 4   | 1773 | 3.58674E-05 |
| Chr4 | 3155203  | 3156053  | 4   | 851  | 3.59739E-05 |
| Chr4 | 3181581  | 3183973  | 5   | 2393 | 1.81245E-05 |
| Chr4 | 3290610  | 3291118  | 4   | 509  | 7.63E-07    |
| Chr4 | 3367607  | 3368536  | 4   | 930  | 3.24225E-06 |
| Chr4 | 3462827  | 3465257  | 6   | 2431 | 2.70E-08    |

|      |          |          |     |      |             |
|------|----------|----------|-----|------|-------------|
| Chr4 | 3546773  | 3548025  | 4   | 1253 | 1.70367E-06 |
| Chr4 | 3551466  | 3552975  | 4   | 1510 | 3.005E-05   |
| Chr4 | 3619500  | 3622940  | 9   | 3441 | 3.32E-10    |
| Chr4 | 3627355  | 3628112  | 4   | 758  | 3.13618E-06 |
| Chr4 | 3676947  | 3678252  | 5   | 1306 | 7.53E-08    |
| Chr4 | 3712492  | 3714190  | 5   | 1699 | 6.26E-07    |
| Chr4 | 3776813  | 3777590  | 4   | 778  | 2.29976E-05 |
| Chr4 | 3920992  | 3922194  | 4   | 1203 | 6.47202E-05 |
| Chr4 | 3950074  | 3955903  | 120 | 5830 | 1.07E-139   |
| Chr4 | 3965385  | 3966790  | 5   | 1406 | 2.89111E-05 |
| Chr4 | 3968149  | 3969441  | 5   | 1293 | 1.34E-07    |
| Chr4 | 3992253  | 3992962  | 5   | 710  | 2.26203E-06 |
| Chr4 | 4241098  | 4243270  | 5   | 2173 | 3.49124E-05 |
| Chr4 | 4249779  | 4251135  | 4   | 1357 | 7.03556E-07 |
| Chr4 | 4387528  | 4390255  | 6   | 2728 | 1.30E-09    |
| Chr4 | 4437162  | 4440425  | 5   | 3264 | 2.66827E-06 |
| Chr4 | 4600333  | 4601555  | 4   | 1223 | 9.41042E-06 |
| Chr4 | 4730270  | 4730479  | 4   | 210  | 0.00011449  |
| Chr4 | 4731634  | 4734037  | 9   | 2404 | 1.15E-10    |
| Chr4 | 4899575  | 4900062  | 4   | 488  | 1.88814E-05 |
| Chr4 | 4961185  | 4965949  | 12  | 4765 | 1.78E-15    |
| Chr4 | 5014747  | 5016492  | 5   | 1746 | 1.32826E-05 |
| Chr4 | 5026759  | 5029160  | 5   | 2402 | 1.18E-07    |
| Chr4 | 5054146  | 5056569  | 6   | 2424 | 6.78E-09    |
| Chr4 | 5069864  | 5070694  | 4   | 831  | 1.10756E-06 |
| Chr4 | 5073268  | 5075612  | 7   | 2345 | 6.01E-09    |
| Chr4 | 5399052  | 5401895  | 6   | 2844 | 2.71E-08    |
| Chr4 | 5521738  | 5523324  | 6   | 1587 | 2.57E-07    |
| Chr4 | 5622855  | 5625009  | 5   | 2155 | 9.66437E-06 |
| Chr4 | 5627329  | 5629022  | 4   | 1694 | 4.94501E-06 |
| Chr4 | 5647058  | 5647128  | 4   | 71   | 5.87E-07    |
| Chr4 | 5822387  | 5823161  | 4   | 775  | 1.85E-09    |
| Chr4 | 5966464  | 5967604  | 5   | 1141 | 1.24178E-05 |
| Chr4 | 6130158  | 6132414  | 6   | 2257 | 3.90E-10    |
| Chr4 | 6652699  | 6654087  | 5   | 1389 | 3.79661E-06 |
| Chr4 | 6723455  | 6724722  | 10  | 1268 | 1.18E-11    |
| Chr4 | 6727699  | 6729747  | 8   | 2049 | 3.94E-14    |
| Chr4 | 7390161  | 7390954  | 4   | 794  | 8.70E-07    |
| Chr4 | 7688192  | 7688559  | 4   | 368  | 1.18E-08    |
| Chr4 | 8901251  | 8903385  | 5   | 2135 | 1.67E-08    |
| Chr4 | 9484424  | 9485331  | 4   | 908  | 4.13098E-05 |
| Chr4 | 9491628  | 9491940  | 4   | 313  | 2.33086E-05 |
| Chr4 | 11037510 | 11040617 | 8   | 3108 | 1.58E-11    |
| Chr4 | 17712917 | 17714568 | 7   | 1652 | 8.63E-09    |
| Chr5 | 65503    | 66385    | 4   | 883  | 1.96837E-05 |
| Chr5 | 724923   | 726354   | 4   | 1432 | 1.85E-07    |
| Chr5 | 2040059  | 2040175  | 4   | 117  | 4.96128E-06 |
| Chr5 | 2258120  | 2262558  | 12  | 4439 | 1.02E-15    |
| Chr5 | 3253148  | 3253276  | 23  | 129  | 7.71E-43    |
| Chr5 | 4324081  | 4325638  | 4   | 1558 | 6.9593E-06  |
| Chr5 | 5008048  | 5008343  | 4   | 296  | 3.50343E-06 |
| Chr5 | 6208714  | 6208881  | 4   | 168  | 0.000110144 |
| Chr5 | 7027636  | 7028655  | 5   | 1020 | 1.43E-07    |
| Chr5 | 9250695  | 9253590  | 6   | 2896 | 2.4521E-06  |
| Chr5 | 9412260  | 9412897  | 4   | 638  | 5.98E-07    |
| Chr5 | 9925797  | 9927234  | 7   | 1438 | 3.00E-12    |
| Chr5 | 9982017  | 9983146  | 4   | 1130 | 4.6004E-05  |
| Chr5 | 10049683 | 10050919 | 5   | 1237 | 4.56E-09    |
| Chr5 | 10054792 | 10055966 | 4   | 1175 | 1.14036E-06 |
| Chr5 | 10105789 | 10106785 | 4   | 997  | 3.85003E-06 |
| Chr5 | 10518377 | 10519011 | 4   | 635  | 0.000856418 |
| Chr5 | 10739116 | 10740540 | 5   | 1425 | 1.10227E-05 |
| Chr5 | 10885035 | 10887052 | 4   | 2018 | 1.28E-08    |



|      |          |          |    |      |             |
|------|----------|----------|----|------|-------------|
| Chr5 | 11070697 | 11072199 | 4  | 1503 | 4.32919E-06 |
| Chr5 | 11100550 | 11103234 | 7  | 2685 | 3.98E-11    |
| Chr5 | 11154233 | 11154617 | 4  | 385  | 2.06682E-05 |
| Chr5 | 11328351 | 11328583 | 4  | 233  | 1.43058E-06 |
| Chr5 | 11342995 | 11344277 | 4  | 1283 | 2.82E-09    |
| Chr5 | 11397789 | 11398790 | 4  | 1002 | 4.80E-07    |
| Chr5 | 11559553 | 11560647 | 4  | 1095 | 2.62182E-05 |
| Chr5 | 11582099 | 11582704 | 4  | 606  | 2.56213E-06 |
| Chr5 | 11626393 | 11627859 | 4  | 1467 | 5.17609E-05 |
| Chr5 | 11658802 | 11660431 | 4  | 1630 | 1.4237E-05  |
| Chr5 | 11701698 | 11704122 | 10 | 2425 | 5.04E-10    |
| Chr5 | 11706034 | 11709953 | 13 | 3920 | 7.69E-14    |
| Chr5 | 11723414 | 11724979 | 10 | 1566 | 1.10E-12    |
| Chr5 | 11726216 | 11736116 | 75 | 9901 | 4.91E-86    |
| Chr5 | 11749690 | 11751269 | 5  | 1580 | 2.01167E-06 |
| Chr5 | 11753621 | 11754837 | 5  | 1217 | 0.002872112 |
| Chr5 | 11764999 | 11765921 | 12 | 923  | 1.46E-29    |
| Chr5 | 11768934 | 11770801 | 7  | 1868 | 1.93E-07    |
| Chr5 | 11796417 | 11797877 | 5  | 1461 | 0.000961448 |
| Chr5 | 11904330 | 11904906 | 4  | 577  | 2.69E-07    |
| Chr5 | 11919038 | 11920542 | 5  | 1505 | 1.33778E-05 |
| Chr5 | 11935843 | 11937823 | 6  | 1981 | 3.29931E-06 |
| Chr5 | 11939401 | 11940635 | 8  | 1235 | 2.87E-13    |
| Chr5 | 11982451 | 11983712 | 6  | 1262 | 1.27E-09    |
| Chr5 | 11993085 | 11995390 | 7  | 2306 | 2.39E-10    |
| Chr5 | 12000700 | 12001981 | 4  | 1282 | 5.95447E-05 |
| Chr5 | 12006927 | 12007994 | 4  | 1068 | 1.08089E-06 |
| Chr5 | 12048660 | 12050517 | 4  | 1858 | 1.76644E-07 |
| Chr5 | 12228155 | 12230044 | 6  | 1890 | 4.75E-08    |
| Chr5 | 12289242 | 12291543 | 8  | 2302 | 3.68E-07    |
| Chr5 | 12402337 | 12404221 | 5  | 1885 | 7.88244E-07 |
| Chr5 | 12431925 | 12432856 | 4  | 932  | 1.04048E-05 |
| Chr5 | 12610433 | 12611992 | 4  | 1560 | 2.11E-08    |
| Chr5 | 12742197 | 12742381 | 5  | 185  | 4.95342E-07 |
| Chr5 | 12747457 | 12748479 | 6  | 1023 | 1.75601E-06 |
| Chr5 | 12770478 | 12772952 | 7  | 2475 | 1.76E-09    |
| Chr5 | 12969819 | 12970391 | 4  | 573  | 7.8795E-05  |
| Chr5 | 12977652 | 12980305 | 7  | 2654 | 1.95E-10    |
| Chr5 | 13023996 | 13025582 | 4  | 1587 | 0.001260716 |
| Chr5 | 13282340 | 13283956 | 4  | 1617 | 4.97424E-05 |
| Chr5 | 13538190 | 13539372 | 5  | 1183 | 1.29398E-06 |
| Chr5 | 13847297 | 13848176 | 4  | 880  | 8.47E-07    |
| Chr5 | 14038311 | 14038888 | 4  | 578  | 6.79043E-06 |
| Chr5 | 14702397 | 14703779 | 4  | 1383 | 3.63754E-06 |
| Chr5 | 15239782 | 15240321 | 4  | 540  | 6.93E-07    |
| Chr5 | 15241515 | 15243006 | 4  | 1492 | 2.64006E-05 |
| Chr5 | 15353375 | 15356882 | 6  | 3508 | 2.69E-08    |
| Chr5 | 15493104 | 15494980 | 4  | 1877 | 6.16333E-06 |
| Chr5 | 15925443 | 15926778 | 4  | 1336 | 7.94796E-06 |
| Chr5 | 17601048 | 17603089 | 5  | 2042 | 8.67E-07    |
| Chr5 | 18491034 | 18493041 | 4  | 2008 | 5.30278E-05 |
| Chr5 | 19359938 | 19361884 | 6  | 1947 | 6.18E-09    |
| Chr5 | 21172759 | 21172804 | 4  | 46   | 7.70E-18    |
| Chr5 | 21689891 | 21691711 | 7  | 1821 | 3.49E-11    |

**-Pit Shoot 16 dat (Hypo-DMRs)**

| <b>Chromosome</b> | <b>Start</b> | <b>End</b> | <b>number of DMCs</b> | <b>DMR lenght</b> | <b>P-value</b> |
|-------------------|--------------|------------|-----------------------|-------------------|----------------|
| Chr1              | 76910        | 77399      | 4                     | 490               | 5.51E-08       |
| Chr1              | 789649       | 789666     | 4                     | 18                | 2.59E-07       |
| Chr1              | 2342395      | 2342850    | 10                    | 456               | 3.58E-25       |
| Chr1              | 2719344      | 2720761    | 8                     | 1418              | 7.01E-16       |
| Chr1              | 3819733      | 3820601    | 11                    | 869               | 5.60E-16       |

|      |          |          |    |       |             |
|------|----------|----------|----|-------|-------------|
| Chr1 | 4093309  | 4093982  | 4  | 674   | 5.63E-08    |
| Chr1 | 4176483  | 4177330  | 4  | 848   | 7.40518E-06 |
| Chr1 | 4329878  | 4330265  | 4  | 388   | 6.03E-07    |
| Chr1 | 4570623  | 4570854  | 4  | 232   | 1.53928E-06 |
| Chr1 | 5694636  | 5695795  | 5  | 1160  | 3.99E-08    |
| Chr1 | 5913446  | 5914785  | 4  | 1340  | 2.94E-07    |
| Chr1 | 6589065  | 6589731  | 4  | 667   | 1.97494E-06 |
| Chr1 | 7065987  | 7067941  | 4  | 1955  | 1.00821E-05 |
| Chr1 | 7353082  | 7365034  | 66 | 11953 | 3.93E-65    |
| Chr1 | 7440786  | 7441206  | 6  | 421   | 4.89E-13    |
| Chr1 | 7972206  | 7973255  | 6  | 1050  | 3.95932E-06 |
| Chr1 | 8458595  | 8459553  | 4  | 959   | 1.90E-07    |
| Chr1 | 8461027  | 8461402  | 5  | 376   | 2.59E-07    |
| Chr1 | 8526022  | 8526223  | 5  | 202   | 3.72E-16    |
| Chr1 | 8790575  | 8792576  | 10 | 2002  | 1.97E-14    |
| Chr1 | 8929168  | 8929812  | 4  | 645   | 5.4577E-06  |
| Chr1 | 9677175  | 9677557  | 5  | 383   | 5.54169E-06 |
| Chr1 | 10215778 | 10216025 | 5  | 248   | 6.64E-07    |
| Chr1 | 10698542 | 10700241 | 5  | 1700  | 1.22E-08    |
| Chr1 | 10807547 | 10807620 | 4  | 74    | 1.32E-16    |
| Chr1 | 11561005 | 11561145 | 4  | 141   | 4.33E-08    |
| Chr1 | 11807669 | 11807817 | 5  | 149   | 3.13E-08    |
| Chr1 | 11888680 | 11890223 | 6  | 1544  | 3.22E-07    |
| Chr1 | 11900871 | 11901620 | 4  | 750   | 2.72E-07    |
| Chr1 | 12140114 | 12141704 | 4  | 1591  | 2.3936E-06  |
| Chr1 | 12404985 | 12406765 | 5  | 1781  | 2.69349E-06 |
| Chr1 | 12408438 | 12410067 | 7  | 1630  | 1.89E-11    |
| Chr1 | 12679962 | 12680618 | 4  | 657   | 7.18E-09    |
| Chr1 | 12681646 | 12682721 | 4  | 1076  | 1.75428E-06 |
| Chr1 | 12715307 | 12716582 | 4  | 1276  | 1.45913E-05 |
| Chr1 | 12807396 | 12809095 | 4  | 1700  | 1.32892E-05 |
| Chr1 | 12820558 | 12822767 | 5  | 2210  | 7.22E-07    |
| Chr1 | 12830652 | 12832040 | 4  | 1389  | 8.27E-07    |
| Chr1 | 13001178 | 13001797 | 5  | 620   | 1.44E-08    |
| Chr1 | 13008603 | 13011834 | 8  | 3232  | 1.37E-12    |
| Chr1 | 13019749 | 13020684 | 4  | 936   | 1.25E-07    |
| Chr1 | 13098962 | 13100197 | 6  | 1236  | 4.01E-09    |
| Chr1 | 13127047 | 13127791 | 4  | 745   | 1.13125E-05 |
| Chr1 | 13173865 | 13176528 | 5  | 2664  | 8.72E-08    |
| Chr1 | 13185173 | 13187206 | 5  | 2034  | 4.13514E-06 |
| Chr1 | 13188514 | 13190176 | 4  | 1663  | 9.96097E-06 |
| Chr1 | 13233376 | 13234058 | 4  | 683   | 1.11E-07    |
| Chr1 | 13266986 | 13268326 | 7  | 1341  | 2.40E-13    |
| Chr1 | 13295954 | 13297109 | 4  | 1156  | 2.08E-07    |
| Chr1 | 13326998 | 13328454 | 4  | 1457  | 8.88427E-05 |
| Chr1 | 13335365 | 13336438 | 4  | 1074  | 5.80388E-06 |
| Chr1 | 13375839 | 13376825 | 4  | 987   | 0.000360447 |
| Chr1 | 13381570 | 13384070 | 6  | 2501  | 1.86E-10    |
| Chr1 | 13399812 | 13401005 | 5  | 1194  | 9.36E-08    |
| Chr1 | 13493017 | 13494804 | 5  | 1788  | 1.29E-07    |
| Chr1 | 13505552 | 13506871 | 4  | 1320  | 2.43124E-05 |
| Chr1 | 13512504 | 13514293 | 8  | 1790  | 8.73E-13    |
| Chr1 | 13561224 | 13563768 | 8  | 2545  | 1.63E-11    |
| Chr1 | 13574374 | 13575998 | 7  | 1625  | 1.86E-09    |
| Chr1 | 13595263 | 13596532 | 7  | 1270  | 3.38E-09    |
| Chr1 | 13630060 | 13631552 | 6  | 1493  | 5.48E-08    |
| Chr1 | 13644196 | 13645189 | 4  | 994   | 1.99218E-06 |
| Chr1 | 13649914 | 13650981 | 6  | 1068  | 3.37E-07    |
| Chr1 | 13652284 | 13654171 | 5  | 1888  | 1.34E-08    |
| Chr1 | 13662475 | 13664026 | 5  | 1552  | 1.04472E-06 |
| Chr1 | 13690631 | 13692981 | 6  | 2351  | 4.64E-09    |
| Chr1 | 13711486 | 13712876 | 6  | 1391  | 3.38E-08    |
| Chr1 | 13723880 | 13725024 | 4  | 1145  | 8.67E-07    |

|      |          |          |    |      |             |
|------|----------|----------|----|------|-------------|
| Chr1 | 13751455 | 13752859 | 5  | 1405 | 4.83E-07    |
| Chr1 | 13769145 | 13771058 | 10 | 1914 | 1.86E-10    |
| Chr1 | 13772108 | 13775305 | 10 | 3198 | 2.26E-08    |
| Chr1 | 13787913 | 13790027 | 8  | 2115 | 7.11E-11    |
| Chr1 | 13796396 | 13799214 | 8  | 2819 | 1.17E-13    |
| Chr1 | 13823413 | 13824513 | 5  | 1101 | 2.23617E-07 |
| Chr1 | 13828634 | 13830128 | 7  | 1495 | 1.02904E-06 |
| Chr1 | 13832768 | 13836422 | 16 | 3655 | 2.40E-20    |
| Chr1 | 13840540 | 13842501 | 6  | 1962 | 1.33E-10    |
| Chr1 | 13845046 | 13847192 | 4  | 2147 | 8.10605E-06 |
| Chr1 | 13871458 | 13872995 | 4  | 1538 | 2.18E-08    |
| Chr1 | 13888282 | 13889335 | 6  | 1054 | 1.05E-08    |
| Chr1 | 13919271 | 13922326 | 11 | 3056 | 6.83E-16    |
| Chr1 | 13945222 | 13947955 | 6  | 2734 | 3.41E-08    |
| Chr1 | 13950595 | 13953025 | 6  | 2431 | 1.53E-08    |
| Chr1 | 13954743 | 13956010 | 9  | 1268 | 1.35E-08    |
| Chr1 | 13957563 | 13960695 | 7  | 3133 | 1.45E-09    |
| Chr1 | 13970023 | 13972508 | 8  | 2486 | 4.17E-11    |
| Chr1 | 13977640 | 13978491 | 4  | 852  | 1.89828E-05 |
| Chr1 | 14035394 | 14037114 | 5  | 1721 | 2.96017E-06 |
| Chr1 | 14053326 | 14054551 | 6  | 1226 | 9.20E-10    |
| Chr1 | 14059161 | 14060296 | 5  | 1136 | 4.21E-08    |
| Chr1 | 14071943 | 14073235 | 4  | 1293 | 6.68689E-06 |
| Chr1 | 14077111 | 14080382 | 9  | 3272 | 1.86E-10    |
| Chr1 | 14088457 | 14093110 | 11 | 4654 | 7.96E-15    |
| Chr1 | 14104845 | 14106081 | 8  | 1237 | 6.28E-12    |
| Chr1 | 14109400 | 14112126 | 7  | 2727 | 4.87E-07    |
| Chr1 | 14122088 | 14122903 | 7  | 816  | 1.62E-07    |
| Chr1 | 14124276 | 14125756 | 4  | 1481 | 7.17015E-07 |
| Chr1 | 14139598 | 14140419 | 4  | 822  | 4.30918E-06 |
| Chr1 | 14143856 | 14145999 | 7  | 2144 | 2.05E-09    |
| Chr1 | 14181616 | 14182841 | 4  | 1226 | 2.37858E-06 |
| Chr1 | 14199604 | 14201578 | 8  | 1975 | 3.16E-10    |
| Chr1 | 14203016 | 14204576 | 4  | 1561 | 0.000940535 |
| Chr1 | 14208830 | 14213389 | 11 | 4560 | 1.86E-12    |
| Chr1 | 14215813 | 14216607 | 4  | 795  | 3.89232E-06 |
| Chr1 | 14221689 | 14224470 | 9  | 2782 | 3.89E-12    |
| Chr1 | 14225892 | 14227169 | 4  | 1278 | 2.02064E-06 |
| Chr1 | 14228253 | 14229687 | 8  | 1435 | 8.84E-09    |
| Chr1 | 14233853 | 14234172 | 4  | 320  | 7.53E-08    |
| Chr1 | 14235208 | 14237204 | 9  | 1997 | 8.69E-13    |
| Chr1 | 14239739 | 14241594 | 5  | 1856 | 2.44E-10    |
| Chr1 | 14247016 | 14248278 | 14 | 1263 | 1.44E-16    |
| Chr1 | 14250200 | 14250997 | 6  | 798  | 4.27E-10    |
| Chr1 | 14252847 | 14255227 | 7  | 2381 | 8.93E-09    |
| Chr1 | 14259166 | 14260186 | 7  | 1021 | 1.24E-09    |
| Chr1 | 14267211 | 14270510 | 12 | 3300 | 5.34E-11    |
| Chr1 | 14271589 | 14272846 | 5  | 1258 | 2.90072E-06 |
| Chr1 | 14275072 | 14276468 | 4  | 1397 | 0.000497763 |
| Chr1 | 14279510 | 14280496 | 4  | 987  | 1.092E-05   |
| Chr1 | 14310667 | 14314441 | 9  | 3775 | 6.75E-11    |
| Chr1 | 14315630 | 14318668 | 16 | 3039 | 9.51E-17    |
| Chr1 | 14321559 | 14323430 | 5  | 1872 | 5.61E-09    |
| Chr1 | 14328220 | 14329198 | 5  | 979  | 5.79E-07    |
| Chr1 | 14387385 | 14389570 | 5  | 2186 | 1.54E-07    |
| Chr1 | 14433114 | 14434760 | 6  | 1647 | 7.81E-10    |
| Chr1 | 14450447 | 14451735 | 6  | 1289 | 1.92E-08    |
| Chr1 | 14457165 | 14460139 | 6  | 2975 | 3.23E-08    |
| Chr1 | 14474159 | 14474310 | 4  | 152  | 4.1183E-06  |
| Chr1 | 14479398 | 14481089 | 5  | 1692 | 3.97E-10    |
| Chr1 | 14486088 | 14488724 | 6  | 2637 | 1.31E-07    |
| Chr1 | 14491693 | 14494545 | 7  | 2853 | 2.39E-09    |
| Chr1 | 14495763 | 14497339 | 7  | 1577 | 1.52E-07    |

|      |          |          |    |       |             |
|------|----------|----------|----|-------|-------------|
| Chr1 | 14500262 | 14507663 | 22 | 7402  | 5.89E-31    |
| Chr1 | 14539579 | 14540847 | 5  | 1269  | 1.3185E-05  |
| Chr1 | 14542074 | 14545363 | 11 | 3290  | 7.40E-14    |
| Chr1 | 14582192 | 14584968 | 11 | 2777  | 4.93E-11    |
| Chr1 | 14587274 | 14588212 | 4  | 939   | 5.85554E-06 |
| Chr1 | 14590153 | 14590501 | 6  | 349   | 2.00E-10    |
| Chr1 | 14597497 | 14603563 | 11 | 6067  | 5.51E-15    |
| Chr1 | 14609511 | 14610114 | 4  | 604   | 2.97595E-05 |
| Chr1 | 14670726 | 14672266 | 5  | 1541  | 1.40E-07    |
| Chr1 | 14683734 | 14683973 | 4  | 240   | 7.77E-07    |
| Chr1 | 14715265 | 14716298 | 4  | 1034  | 1.46838E-05 |
| Chr1 | 14721244 | 14722344 | 19 | 1101  | 1.65E-30    |
| Chr1 | 14812743 | 14814262 | 5  | 1520  | 1.79E-07    |
| Chr1 | 14837259 | 14838395 | 5  | 1137  | 4.50E-07    |
| Chr1 | 14846157 | 14850623 | 15 | 4467  | 4.55E-16    |
| Chr1 | 14887203 | 14887742 | 4  | 540   | 5.30694E-07 |
| Chr1 | 14893255 | 14894981 | 4  | 1727  | 0.000541765 |
| Chr1 | 14896548 | 14897514 | 4  | 967   | 8.29E-08    |
| Chr1 | 15007078 | 15008528 | 5  | 1451  | 7.27E-10    |
| Chr1 | 15045982 | 15047252 | 4  | 1271  | 0.004099481 |
| Chr1 | 15060197 | 15061191 | 4  | 995   | 7.81E-07    |
| Chr1 | 15063758 | 15075231 | 37 | 11474 | 7.78E-43    |
| Chr1 | 15079461 | 15084916 | 42 | 5456  | 9.12E-180   |
| Chr1 | 15092203 | 15095647 | 14 | 3445  | 6.07E-11    |
| Chr1 | 15103707 | 15104592 | 4  | 886   | 2.20611E-06 |
| Chr1 | 15136068 | 15136955 | 4  | 888   | 0.000303963 |
| Chr1 | 15138275 | 15138976 | 4  | 702   | 2.90E-08    |
| Chr1 | 15140022 | 15140382 | 4  | 361   | 0.000122879 |
| Chr1 | 15141650 | 15142349 | 4  | 700   | 4.22E-08    |
| Chr1 | 15144668 | 15145071 | 4  | 404   | 8.5428E-06  |
| Chr1 | 15147686 | 15148851 | 5  | 1166  | 1.79E-09    |
| Chr1 | 15153561 | 15157968 | 13 | 4408  | 1.98E-14    |
| Chr1 | 15163943 | 15164958 | 4  | 1016  | 9.59E-09    |
| Chr1 | 15184453 | 15185902 | 7  | 1450  | 1.28E-07    |
| Chr1 | 15188654 | 15190866 | 8  | 2213  | 7.48E-12    |
| Chr1 | 15200339 | 15201306 | 9  | 968   | 3.23E-09    |
| Chr1 | 15208530 | 15208707 | 4  | 178   | 5.26E-09    |
| Chr1 | 15413817 | 15413909 | 4  | 93    | 7.08E-07    |
| Chr1 | 15417715 | 15421256 | 10 | 3542  | 8.22E-11    |
| Chr1 | 15426925 | 15428039 | 4  | 1115  | 8.09885E-06 |
| Chr1 | 15437559 | 15439278 | 7  | 1720  | 1.64E-10    |
| Chr1 | 15444920 | 15453022 | 21 | 8103  | 5.87E-25    |
| Chr1 | 15485973 | 15487650 | 5  | 1678  | 1.60E-08    |
| Chr1 | 15488741 | 15490565 | 9  | 1825  | 5.15E-09    |
| Chr1 | 15492383 | 15493748 | 8  | 1366  | 1.86E-09    |
| Chr1 | 15503911 | 15507059 | 11 | 3149  | 1.75E-15    |
| Chr1 | 15510820 | 15511388 | 4  | 569   | 2.70E-07    |
| Chr1 | 15532593 | 15535186 | 8  | 2594  | 6.32E-14    |
| Chr1 | 15536455 | 15537158 | 5  | 704   | 1.20251E-05 |
| Chr1 | 15541695 | 15542600 | 4  | 906   | 5.60541E-05 |
| Chr1 | 15543619 | 15545259 | 7  | 1641  | 6.32E-10    |
| Chr1 | 15551326 | 15552964 | 6  | 1639  | 1.49777E-05 |
| Chr1 | 15556910 | 15562166 | 18 | 5257  | 3.94E-22    |
| Chr1 | 15564188 | 15565351 | 4  | 1164  | 7.15E-07    |
| Chr1 | 15566641 | 15572303 | 19 | 5663  | 1.29E-23    |
| Chr1 | 15633220 | 15634993 | 5  | 1774  | 4.85E-08    |
| Chr1 | 15654321 | 15656718 | 5  | 2398  | 5.33757E-06 |
| Chr1 | 15670745 | 15672756 | 8  | 2012  | 3.95E-10    |
| Chr1 | 15677065 | 15678061 | 4  | 997   | 2.75381E-06 |
| Chr1 | 15683276 | 15684357 | 6  | 1082  | 1.26E-11    |
| Chr1 | 15685483 | 15687140 | 5  | 1658  | 2.03E-07    |
| Chr1 | 15690859 | 15692323 | 6  | 1465  | 4.16562E-07 |
| Chr1 | 15694612 | 15696106 | 4  | 1495  | 0.000376934 |

|      |          |          |    |      |             |
|------|----------|----------|----|------|-------------|
| Chr1 | 15697176 | 15703147 | 20 | 5972 | 2.29E-27    |
| Chr1 | 15704303 | 15706065 | 5  | 1763 | 1.37E-07    |
| Chr1 | 15707084 | 15708623 | 5  | 1540 | 7.64E-07    |
| Chr1 | 15717028 | 15717766 | 5  | 739  | 1.51E-07    |
| Chr1 | 15735393 | 15736383 | 4  | 991  | 1.21346E-05 |
| Chr1 | 15757035 | 15758383 | 7  | 1349 | 5.22E-09    |
| Chr1 | 15759488 | 15760107 | 6  | 620  | 1.94E-08    |
| Chr1 | 15804821 | 15805319 | 5  | 499  | 6.39981E-05 |
| Chr1 | 15812968 | 15814160 | 4  | 1193 | 8.02327E-05 |
| Chr1 | 15822375 | 15825320 | 10 | 2946 | 9.40E-14    |
| Chr1 | 15831971 | 15833334 | 4  | 1364 | 1.00E-08    |
| Chr1 | 15845629 | 15846928 | 5  | 1300 | 2.28E-07    |
| Chr1 | 15851886 | 15852861 | 7  | 976  | 1.68E-11    |
| Chr1 | 15872777 | 15873774 | 4  | 998  | 2.5294E-06  |
| Chr1 | 15876094 | 15878262 | 8  | 2169 | 8.77E-11    |
| Chr1 | 15935662 | 15935688 | 6  | 27   | 2.66E-14    |
| Chr1 | 15950686 | 15952380 | 4  | 1695 | 1.79766E-06 |
| Chr1 | 16016607 | 16018775 | 6  | 2169 | 8.46E-10    |
| Chr1 | 16046993 | 16049409 | 9  | 2417 | 1.86E-12    |
| Chr1 | 16079058 | 16080057 | 4  | 1000 | 4.59E-07    |
| Chr1 | 16093818 | 16095025 | 7  | 1208 | 8.65E-10    |
| Chr1 | 16098111 | 16104976 | 29 | 6866 | 8.78E-31    |
| Chr1 | 16110011 | 16114203 | 13 | 4193 | 5.77E-20    |
| Chr1 | 16116515 | 16117957 | 6  | 1443 | 8.62E-13    |
| Chr1 | 16119378 | 16121155 | 7  | 1778 | 1.75E-10    |
| Chr1 | 16122445 | 16125286 | 8  | 2842 | 1.44E-12    |
| Chr1 | 16196112 | 16197459 | 4  | 1348 | 1.0303E-07  |
| Chr1 | 16198494 | 16200125 | 6  | 1632 | 3.03E-08    |
| Chr1 | 16201230 | 16203460 | 5  | 2231 | 2.64E-09    |
| Chr1 | 16207622 | 16208902 | 5  | 1281 | 2.34E-08    |
| Chr1 | 16238423 | 16239902 | 4  | 1480 | 3.64E-07    |
| Chr1 | 16298803 | 16299891 | 5  | 1089 | 1.05E-07    |
| Chr1 | 16317987 | 16320122 | 4  | 2136 | 0.000835308 |
| Chr1 | 16321127 | 16322276 | 4  | 1150 | 7.86213E-06 |
| Chr1 | 16329491 | 16331674 | 8  | 2184 | 2.26E-11    |
| Chr1 | 16368579 | 16369385 | 4  | 807  | 1.01609E-06 |
| Chr1 | 16370676 | 16372270 | 4  | 1595 | 1.32507E-05 |
| Chr1 | 16373664 | 16377688 | 10 | 4025 | 6.62E-13    |
| Chr1 | 16384716 | 16386307 | 6  | 1592 | 3.65E-09    |
| Chr1 | 16489019 | 16491321 | 9  | 2303 | 1.20E-12    |
| Chr1 | 16495847 | 16496389 | 4  | 543  | 1.20E-09    |
| Chr1 | 16503603 | 16504502 | 5  | 900  | 1.96E-08    |
| Chr1 | 16507054 | 16510317 | 10 | 3264 | 3.33725E-06 |
| Chr1 | 16511402 | 16514550 | 11 | 3149 | 5.02E-17    |
| Chr1 | 16520045 | 16524030 | 15 | 3986 | 6.13E-15    |
| Chr1 | 16525110 | 16532930 | 22 | 7821 | 1.97E-23    |
| Chr1 | 16538551 | 16538611 | 5  | 61   | 3.19E-09    |
| Chr1 | 16572156 | 16573142 | 4  | 987  | 3.42E-07    |
| Chr1 | 16584802 | 16586997 | 7  | 2196 | 4.31E-09    |
| Chr1 | 16605809 | 16607066 | 4  | 1258 | 1.65998E-06 |
| Chr1 | 16629623 | 16631111 | 4  | 1489 | 0.000311544 |
| Chr1 | 16633842 | 16637030 | 8  | 3189 | 1.13E-12    |
| Chr1 | 16656167 | 16657039 | 6  | 873  | 2.41E-14    |
| Chr1 | 16679696 | 16681986 | 8  | 2291 | 2.43E-09    |
| Chr1 | 16743220 | 16743927 | 6  | 708  | 1.79E-08    |
| Chr1 | 17023477 | 17025950 | 7  | 2474 | 1.20E-09    |
| Chr1 | 17036037 | 17037990 | 4  | 1954 | 0.000701323 |
| Chr1 | 17039653 | 17041025 | 4  | 1373 | 4.16E-07    |
| Chr1 | 17044897 | 17046175 | 7  | 1279 | 2.46E-11    |
| Chr1 | 17047191 | 17049187 | 8  | 1997 | 5.13E-08    |
| Chr1 | 17257963 | 17260427 | 10 | 2465 | 4.41E-18    |
| Chr1 | 17261889 | 17265081 | 9  | 3193 | 1.46E-11    |
| Chr1 | 17341824 | 17342801 | 4  | 978  | 2.8759E-05  |

|      |          |          |    |      |             |
|------|----------|----------|----|------|-------------|
| Chr1 | 17361873 | 17363435 | 5  | 1563 | 6.25E-08    |
| Chr1 | 17489200 | 17489993 | 4  | 794  | 5.36E-07    |
| Chr1 | 17676635 | 17678192 | 6  | 1558 | 4.87E-07    |
| Chr1 | 17842344 | 17844528 | 9  | 2185 | 2.07E-12    |
| Chr1 | 18297509 | 18297687 | 5  | 179  | 2.88E-09    |
| Chr1 | 18338680 | 18339913 | 8  | 1234 | 1.52E-12    |
| Chr1 | 18643946 | 18644079 | 4  | 134  | 2.88E-07    |
| Chr1 | 19336379 | 19338732 | 9  | 2354 | 1.15E-11    |
| Chr1 | 19344640 | 19345557 | 7  | 918  | 2.45E-10    |
| Chr1 | 19714603 | 19714838 | 4  | 236  | 2.25E-07    |
| Chr1 | 19727903 | 19728973 | 4  | 1071 | 1.32E-07    |
| Chr1 | 19885420 | 19887261 | 6  | 1842 | 2.16E-23    |
| Chr1 | 19904214 | 19904497 | 5  | 284  | 5.10E-09    |
| Chr1 | 19963195 | 19964071 | 5  | 877  | 2.99E-08    |
| Chr1 | 20086568 | 20088191 | 4  | 1624 | 3.01481E-06 |
| Chr1 | 20317031 | 20318549 | 6  | 1519 | 4.17E-08    |
| Chr1 | 20412357 | 20412504 | 7  | 148  | 2.59E-10    |
| Chr1 | 20685688 | 20685800 | 4  | 113  | 1.99001E-06 |
| Chr1 | 21453103 | 21453391 | 4  | 289  | 1.31E-07    |
| Chr1 | 21691696 | 21692418 | 4  | 723  | 2.22564E-06 |
| Chr1 | 21747456 | 21753122 | 22 | 5667 | 7.03E-31    |
| Chr1 | 21860568 | 21860624 | 4  | 57   | 1.23018E-05 |
| Chr1 | 22644357 | 22644936 | 9  | 580  | 2.26E-19    |
| Chr1 | 22662791 | 22663114 | 5  | 324  | 2.90E-08    |
| Chr1 | 22697561 | 22699358 | 8  | 1798 | 1.77E-10    |
| Chr1 | 23355979 | 23356814 | 5  | 836  | 1.95E-07    |
| Chr1 | 23805873 | 23806063 | 5  | 191  | 3.29E-09    |
| Chr1 | 24275851 | 24277431 | 5  | 1581 | 1.27552E-05 |
| Chr1 | 25159700 | 25160064 | 4  | 365  | 8.70E-07    |
| Chr1 | 26367310 | 26368405 | 4  | 1096 | 2.08E-07    |
| Chr1 | 26940007 | 26940065 | 4  | 59   | 6.39E-10    |
| Chr1 | 27515040 | 27515145 | 4  | 106  | 3.74E-07    |
| Chr1 | 27863736 | 27864613 | 6  | 878  | 1.44E-10    |
| Chr1 | 28910203 | 28910847 | 4  | 645  | 8.40E-07    |
| Chr1 | 29476766 | 29477922 | 5  | 1157 | 1.39016E-05 |
| Chr1 | 29589827 | 29590036 | 4  | 210  | 1.40E-07    |
| Chr1 | 29611703 | 29611711 | 4  | 9    | 1.11E-07    |
| Chr1 | 30385021 | 30385206 | 4  | 186  | 1.39E-10    |
| Chr2 | 1267     | 3783     | 92 | 2517 | 2.98E-243   |
| Chr2 | 5416     | 5997     | 16 | 582  | 2.13E-22    |
| Chr2 | 9621     | 11209    | 30 | 1589 | 6.49E-176   |
| Chr2 | 39262    | 40919    | 6  | 1658 | 1.03127E-05 |
| Chr2 | 303259   | 303404   | 8  | 146  | 2.30E-14    |
| Chr2 | 373272   | 379543   | 17 | 6272 | 2.99E-24    |
| Chr2 | 533222   | 534841   | 6  | 1620 | 5.19E-09    |
| Chr2 | 567150   | 569435   | 4  | 2286 | 9.21E-07    |
| Chr2 | 585037   | 586010   | 5  | 974  | 3.41E-10    |
| Chr2 | 819943   | 820084   | 4  | 142  | 3.85E-07    |
| Chr2 | 1228906  | 1232077  | 8  | 3172 | 1.91E-12    |
| Chr2 | 1335666  | 1335926  | 4  | 261  | 1.69E-09    |
| Chr2 | 1828438  | 1829605  | 5  | 1168 | 5.77E-08    |
| Chr2 | 1883355  | 1884405  | 5  | 1051 | 3.07E-07    |
| Chr2 | 1889447  | 1890175  | 4  | 729  | 8.53584E-06 |
| Chr2 | 2036499  | 2038659  | 7  | 2161 | 5.35E-09    |
| Chr2 | 2077394  | 2078286  | 7  | 893  | 2.70E-10    |
| Chr2 | 2091814  | 2092662  | 4  | 849  | 5.58055E-06 |
| Chr2 | 2187773  | 2189482  | 7  | 1710 | 5.35E-10    |
| Chr2 | 2278580  | 2279947  | 8  | 1368 | 5.25E-12    |
| Chr2 | 2302620  | 2304782  | 6  | 2163 | 1.38E-07    |
| Chr2 | 2326026  | 2326457  | 4  | 432  | 4.79676E-05 |
| Chr2 | 2373448  | 2374254  | 4  | 807  | 9.46447E-06 |
| Chr2 | 2375804  | 2376678  | 4  | 875  | 0.000131401 |
| Chr2 | 2380287  | 2382109  | 7  | 1823 | 1.45E-12    |

|      |         |         |    |      |             |
|------|---------|---------|----|------|-------------|
| Chr2 | 2384271 | 2385147 | 4  | 877  | 1.49295E-06 |
| Chr2 | 2401267 | 2403371 | 6  | 2105 | 5.01E-11    |
| Chr2 | 2406212 | 2406951 | 5  | 740  | 1.03E-09    |
| Chr2 | 2448030 | 2454034 | 14 | 6005 | 3.33E-20    |
| Chr2 | 2464937 | 2465941 | 6  | 1005 | 4.25E-07    |
| Chr2 | 2474826 | 2476745 | 4  | 1920 | 0.000332279 |
| Chr2 | 2487824 | 2489669 | 8  | 1846 | 5.40E-09    |
| Chr2 | 2491164 | 2494270 | 11 | 3107 | 7.33E-15    |
| Chr2 | 2495788 | 2501618 | 18 | 5831 | 9.51E-18    |
| Chr2 | 2504846 | 2507777 | 11 | 2932 | 2.93E-12    |
| Chr2 | 2528371 | 2529758 | 6  | 1388 | 4.34E-09    |
| Chr2 | 2532304 | 2533933 | 7  | 1630 | 5.22E-11    |
| Chr2 | 2576371 | 2578057 | 4  | 1687 | 3.53E-07    |
| Chr2 | 2592015 | 2593944 | 4  | 1930 | 7.72E-09    |
| Chr2 | 2602858 | 2605019 | 8  | 2162 | 5.89E-12    |
| Chr2 | 2622199 | 2625838 | 9  | 3640 | 7.92E-15    |
| Chr2 | 2626891 | 2627563 | 4  | 673  | 1.53021E-06 |
| Chr2 | 2647712 | 2649634 | 6  | 1923 | 2.16E-08    |
| Chr2 | 2666829 | 2669972 | 6  | 3144 | 3.77E-09    |
| Chr2 | 2677359 | 2677442 | 4  | 84   | 1.16166E-05 |
| Chr2 | 2683758 | 2686889 | 9  | 3132 | 1.92E-12    |
| Chr2 | 2699724 | 2700530 | 4  | 807  | 5.65E-10    |
| Chr2 | 2703433 | 2704990 | 5  | 1558 | 2.16E-08    |
| Chr2 | 2711947 | 2713983 | 7  | 2037 | 3.55E-10    |
| Chr2 | 2718037 | 2720414 | 6  | 2378 | 4.06067E-06 |
| Chr2 | 2741778 | 2743279 | 5  | 1502 | 3.30623E-06 |
| Chr2 | 2768941 | 2770846 | 4  | 1906 | 2.16E-07    |
| Chr2 | 2796788 | 2798860 | 4  | 2073 | 1.64301E-06 |
| Chr2 | 2800074 | 2801910 | 4  | 1837 | 3.22968E-06 |
| Chr2 | 2809048 | 2810098 | 7  | 1051 | 4.27E-09    |
| Chr2 | 2824327 | 2826896 | 7  | 2570 | 1.37E-10    |
| Chr2 | 2879281 | 2881993 | 8  | 2713 | 7.45E-11    |
| Chr2 | 2902394 | 2904683 | 5  | 2290 | 4.29873E-06 |
| Chr2 | 3057779 | 3061164 | 6  | 3386 | 1.99E-10    |
| Chr2 | 3065335 | 3067222 | 4  | 1888 | 1.66883E-05 |
| Chr2 | 3075581 | 3077503 | 5  | 1923 | 7.51E-08    |
| Chr2 | 3080180 | 3081560 | 4  | 1381 | 1.78382E-05 |
| Chr2 | 3084179 | 3086278 | 4  | 2100 | 8.43947E-05 |
| Chr2 | 3091057 | 3093167 | 8  | 2111 | 3.20E-11    |
| Chr2 | 3098565 | 3102569 | 10 | 4005 | 6.13E-14    |
| Chr2 | 3104364 | 3105500 | 4  | 1137 | 1.04129E-05 |
| Chr2 | 3120121 | 3124812 | 10 | 4692 | 2.00E-13    |
| Chr2 | 3154345 | 3155632 | 4  | 1288 | 1.78E-08    |
| Chr2 | 3161765 | 3163582 | 4  | 1818 | 1.98381E-05 |
| Chr2 | 3215285 | 3216927 | 4  | 1643 | 5.96994E-07 |
| Chr2 | 3247334 | 3248181 | 4  | 848  | 1.73271E-05 |
| Chr2 | 3283492 | 3283791 | 8  | 300  | 2.14E-12    |
| Chr2 | 3286874 | 3287448 | 7  | 575  | 1.14E-12    |
| Chr2 | 3544082 | 3545299 | 5  | 1218 | 1.64E-07    |
| Chr2 | 3548837 | 3551971 | 10 | 3135 | 2.09E-13    |
| Chr2 | 3554334 | 3556733 | 7  | 2400 | 2.12E-12    |
| Chr2 | 3559025 | 3559774 | 4  | 750  | 7.37506E-06 |
| Chr2 | 3570057 | 3571508 | 4  | 1452 | 4.64608E-05 |
| Chr2 | 3584757 | 3586820 | 6  | 2064 | 1.54E-08    |
| Chr2 | 3605330 | 3607324 | 28 | 1995 | 3.97E-67    |
| Chr2 | 3614983 | 3617225 | 22 | 2243 | 5.52E-49    |
| Chr2 | 3618462 | 3627836 | 83 | 9375 | 4.43E-74    |
| Chr2 | 3638541 | 3642045 | 8  | 3505 | 4.11E-12    |
| Chr2 | 3643808 | 3644731 | 8  | 924  | 1.54E-10    |
| Chr2 | 3687901 | 3689420 | 12 | 1520 | 2.08E-12    |
| Chr2 | 3732945 | 3735141 | 9  | 2197 | 8.24E-13    |
| Chr2 | 3752269 | 3753348 | 5  | 1080 | 2.31311E-06 |
| Chr2 | 3754795 | 3754971 | 4  | 177  | 7.84605E-06 |

|      |         |         |    |      |             |
|------|---------|---------|----|------|-------------|
| Chr2 | 3768670 | 3772281 | 14 | 3612 | 3.09E-17    |
| Chr2 | 3790500 | 3791370 | 6  | 871  | 4.29E-07    |
| Chr2 | 3826208 | 3827525 | 4  | 1318 | 1.77703E-06 |
| Chr2 | 3835826 | 3839740 | 14 | 3915 | 1.14E-19    |
| Chr2 | 3855497 | 3857542 | 6  | 2046 | 3.46E-10    |
| Chr2 | 3865410 | 3865441 | 4  | 32   | 4.52E-07    |
| Chr2 | 3869192 | 3870448 | 5  | 1257 | 2.81E-09    |
| Chr2 | 3876109 | 3881054 | 12 | 4946 | 1.40E-15    |
| Chr2 | 3883481 | 3890823 | 16 | 7343 | 9.45E-23    |
| Chr2 | 3899941 | 3901837 | 10 | 1897 | 3.83E-13    |
| Chr2 | 3923809 | 3924937 | 5  | 1129 | 2.1597E-06  |
| Chr2 | 3942664 | 3944293 | 5  | 1630 | 1.32E-07    |
| Chr2 | 3946622 | 3949759 | 20 | 3138 | 6.75E-21    |
| Chr2 | 3950919 | 3954740 | 19 | 3822 | 1.20E-20    |
| Chr2 | 3955882 | 3956716 | 7  | 835  | 9.67E-09    |
| Chr2 | 3958378 | 3959919 | 8  | 1542 | 2.30E-11    |
| Chr2 | 3963653 | 3967252 | 15 | 3600 | 2.94E-23    |
| Chr2 | 3968482 | 3971871 | 12 | 3390 | 1.29E-16    |
| Chr2 | 3973581 | 3976044 | 5  | 2464 | 1.35E-07    |
| Chr2 | 3982784 | 3985169 | 8  | 2386 | 1.37E-10    |
| Chr2 | 4009430 | 4011313 | 6  | 1884 | 2.16503E-06 |
| Chr2 | 4061496 | 4062267 | 4  | 772  | 0.000660383 |
| Chr2 | 4111453 | 4113228 | 5  | 1776 | 6.94E-10    |
| Chr2 | 4114591 | 4115452 | 4  | 862  | 3.2882E-05  |
| Chr2 | 4129028 | 4132603 | 9  | 3576 | 2.89873E-05 |
| Chr2 | 4151541 | 4156575 | 12 | 5035 | 5.24E-16    |
| Chr2 | 4165667 | 4166395 | 5  | 729  | 1.71E-07    |
| Chr2 | 4167587 | 4168206 | 5  | 620  | 1.01E-08    |
| Chr2 | 4173007 | 4180026 | 24 | 7020 | 2.71E-36    |
| Chr2 | 4181388 | 4183387 | 5  | 2000 | 1.06E-07    |
| Chr2 | 4184849 | 4185485 | 4  | 637  | 3.82366E-06 |
| Chr2 | 4188066 | 4190388 | 10 | 2323 | 3.35E-13    |
| Chr2 | 4191531 | 4193372 | 12 | 1842 | 3.95E-16    |
| Chr2 | 4198618 | 4201903 | 11 | 3286 | 3.48E-13    |
| Chr2 | 4204501 | 4206339 | 6  | 1839 | 1.16E-10    |
| Chr2 | 4238559 | 4240138 | 6  | 1580 | 7.76E-09    |
| Chr2 | 4241282 | 4242119 | 9  | 838  | 8.32E-22    |
| Chr2 | 4250678 | 4251775 | 4  | 1098 | 2.67842E-06 |
| Chr2 | 4253731 | 4254903 | 5  | 1173 | 1.83E-07    |
| Chr2 | 4256777 | 4259143 | 7  | 2367 | 5.51E-10    |
| Chr2 | 4260362 | 4261608 | 4  | 1247 | 2.78272E-05 |
| Chr2 | 4278031 | 4281854 | 19 | 3824 | 2.00E-22    |
| Chr2 | 4284308 | 4285536 | 4  | 1229 | 1.79E-08    |
| Chr2 | 4286542 | 4288032 | 4  | 1491 | 1.40436E-06 |
| Chr2 | 4289536 | 4293776 | 13 | 4241 | 3.99E-17    |
| Chr2 | 4311272 | 4311957 | 7  | 686  | 7.72E-08    |
| Chr2 | 4367903 | 4369991 | 9  | 2089 | 1.73E-14    |
| Chr2 | 4378060 | 4380014 | 8  | 1955 | 8.15E-09    |
| Chr2 | 4386375 | 4387213 | 4  | 839  | 1.66261E-05 |
| Chr2 | 4392334 | 4395085 | 8  | 2752 | 3.65E-11    |
| Chr2 | 4396430 | 4398621 | 10 | 2192 | 4.76E-09    |
| Chr2 | 4400050 | 4403825 | 10 | 3776 | 4.18E-13    |
| Chr2 | 4408334 | 4410360 | 4  | 2027 | 2.56E-07    |
| Chr2 | 4412893 | 4413502 | 5  | 610  | 1.04787E-06 |
| Chr2 | 4452528 | 4453847 | 4  | 1320 | 1.89258E-06 |
| Chr2 | 4465331 | 4467006 | 8  | 1676 | 1.08E-13    |
| Chr2 | 4494607 | 4495875 | 6  | 1269 | 2.40E-08    |
| Chr2 | 4515584 | 4517761 | 4  | 2178 | 5.26E-07    |
| Chr2 | 4519463 | 4520247 | 6  | 785  | 1.03E-07    |
| Chr2 | 4522859 | 4523115 | 4  | 257  | 3.29004E-06 |
| Chr2 | 4533059 | 4534022 | 4  | 964  | 2.03E-07    |
| Chr2 | 4561111 | 4561555 | 4  | 445  | 4.04E-09    |
| Chr2 | 4569903 | 4570841 | 4  | 939  | 6.03572E-06 |



|      |         |         |    |      |             |
|------|---------|---------|----|------|-------------|
| Chr2 | 4572441 | 4579022 | 20 | 6582 | 2.23E-25    |
| Chr2 | 4580262 | 4582650 | 11 | 2389 | 6.55E-15    |
| Chr2 | 4595268 | 4597474 | 6  | 2207 | 3.69E-09    |
| Chr2 | 4605180 | 4606293 | 4  | 1114 | 1.29E-07    |
| Chr2 | 4612157 | 4613865 | 5  | 1709 | 9.54E-07    |
| Chr2 | 4616770 | 4617681 | 4  | 912  | 1.89135E-05 |
| Chr2 | 4676804 | 4677742 | 4  | 939  | 2.90E-07    |
| Chr2 | 4703879 | 4707660 | 7  | 3782 | 1.21901E-06 |
| Chr2 | 4778285 | 4779134 | 4  | 850  | 2.59204E-06 |
| Chr2 | 4780169 | 4784318 | 8  | 4150 | 4.96E-14    |
| Chr2 | 4808244 | 4808785 | 4  | 542  | 1.09055E-06 |
| Chr2 | 4812090 | 4814008 | 7  | 1919 | 2.62E-10    |
| Chr2 | 4818828 | 4820230 | 5  | 1403 | 2.72718E-06 |
| Chr2 | 4835998 | 4836651 | 4  | 654  | 3.16E-07    |
| Chr2 | 4840663 | 4842040 | 4  | 1378 | 5.66E-07    |
| Chr2 | 4846252 | 4847525 | 4  | 1274 | 4.22868E-06 |
| Chr2 | 4853150 | 4854216 | 4  | 1067 | 0.001592927 |
| Chr2 | 4863437 | 4864738 | 5  | 1302 | 6.22E-08    |
| Chr2 | 4895287 | 4895560 | 4  | 274  | 5.84E-07    |
| Chr2 | 4901051 | 4902248 | 5  | 1198 | 1.22972E-05 |
| Chr2 | 4904313 | 4905294 | 4  | 982  | 3.67E-07    |
| Chr2 | 4906312 | 4908376 | 9  | 2065 | 1.79E-08    |
| Chr2 | 4927057 | 4928239 | 5  | 1183 | 1.94E-07    |
| Chr2 | 4934847 | 4936940 | 6  | 2094 | 2.59E-07    |
| Chr2 | 4953292 | 4954491 | 5  | 1200 | 1.83E-10    |
| Chr2 | 4985991 | 4989364 | 9  | 3374 | 2.02E-17    |
| Chr2 | 4993000 | 4994621 | 5  | 1622 | 2.13E-07    |
| Chr2 | 4999851 | 5002112 | 8  | 2262 | 8.69E-12    |
| Chr2 | 5041850 | 5044530 | 6  | 2681 | 2.77E-10    |
| Chr2 | 5045759 | 5047744 | 7  | 1986 | 1.61E-08    |
| Chr2 | 5058322 | 5058740 | 4  | 419  | 0.000105136 |
| Chr2 | 5080609 | 5081718 | 4  | 1110 | 9.91242E-06 |
| Chr2 | 5088888 | 5092006 | 11 | 3119 | 2.86E-15    |
| Chr2 | 5119656 | 5119920 | 5  | 265  | 8.34E-07    |
| Chr2 | 5122504 | 5123504 | 4  | 1001 | 6.46135E-06 |
| Chr2 | 5127236 | 5129445 | 11 | 2210 | 1.52E-15    |
| Chr2 | 5135259 | 5136043 | 5  | 785  | 4.18E-07    |
| Chr2 | 5137628 | 5139112 | 6  | 1485 | 6.20E-11    |
| Chr2 | 5182995 | 5184343 | 4  | 1349 | 1.83E-07    |
| Chr2 | 5187431 | 5187957 | 4  | 527  | 7.91E-07    |
| Chr2 | 5200097 | 5201038 | 4  | 942  | 0.000365708 |
| Chr2 | 5217562 | 5219046 | 7  | 1485 | 2.05E-15    |
| Chr2 | 5235082 | 5237594 | 4  | 2513 | 5.33E-07    |
| Chr2 | 5241648 | 5243245 | 6  | 1598 | 2.54E-08    |
| Chr2 | 5244641 | 5245779 | 5  | 1139 | 1.61314E-05 |
| Chr2 | 5250473 | 5251720 | 5  | 1248 | 4.17144E-07 |
| Chr2 | 5253148 | 5255557 | 8  | 2410 | 1.51E-11    |
| Chr2 | 5261961 | 5263880 | 4  | 1920 | 1.23E-08    |
| Chr2 | 5277578 | 5283111 | 13 | 5534 | 7.44E-17    |
| Chr2 | 5300318 | 5301352 | 5  | 1035 | 5.24267E-06 |
| Chr2 | 5302563 | 5303214 | 4  | 652  | 1.73223E-06 |
| Chr2 | 5328342 | 5329965 | 6  | 1624 | 1.63431E-05 |
| Chr2 | 5333633 | 5335149 | 4  | 1517 | 2.28E-07    |
| Chr2 | 5338833 | 5340079 | 4  | 1247 | 2.68776E-06 |
| Chr2 | 5342943 | 5344767 | 5  | 1825 | 1.84E-08    |
| Chr2 | 5356475 | 5358508 | 5  | 2034 | 5.62E-08    |
| Chr2 | 5364098 | 5365146 | 4  | 1049 | 6.5312E-07  |
| Chr2 | 5368185 | 5369853 | 6  | 1669 | 1.01E-09    |
| Chr2 | 5379358 | 5381349 | 6  | 1992 | 3.27E-09    |
| Chr2 | 5441247 | 5442180 | 4  | 934  | 2.31725E-06 |
| Chr2 | 5469764 | 5475767 | 14 | 6004 | 1.36E-12    |
| Chr2 | 5494919 | 5497336 | 9  | 2418 | 2.00E-11    |
| Chr2 | 5560217 | 5565224 | 16 | 5008 | 1.40E-16    |

|      |         |         |    |      |             |
|------|---------|---------|----|------|-------------|
| Chr2 | 5566942 | 5567811 | 5  | 870  | 5.87E-07    |
| Chr2 | 5569397 | 5571031 | 5  | 1635 | 1.29E-09    |
| Chr2 | 5573457 | 5575045 | 9  | 1589 | 1.22E-12    |
| Chr2 | 5582205 | 5583269 | 4  | 1065 | 2.86E-09    |
| Chr2 | 5589995 | 5590034 | 4  | 40   | 3.29E-09    |
| Chr2 | 5598755 | 5602489 | 21 | 3735 | 2.88E-21    |
| Chr2 | 5612308 | 5614127 | 6  | 1820 | 1.33E-08    |
| Chr2 | 5624646 | 5626247 | 5  | 1602 | 2.81621E-05 |
| Chr2 | 5630332 | 5631392 | 4  | 1061 | 5.5813E-05  |
| Chr2 | 5635776 | 5636709 | 4  | 934  | 5.75725E-06 |
| Chr2 | 5780676 | 5782573 | 4  | 1898 | 1.51809E-05 |
| Chr2 | 5810587 | 5811830 | 4  | 1244 | 3.70954E-06 |
| Chr2 | 5817046 | 5818694 | 4  | 1649 | 1.51192E-06 |
| Chr2 | 5848341 | 5849429 | 4  | 1089 | 4.87E-09    |
| Chr2 | 5894505 | 5895806 | 5  | 1302 | 2.81E-11    |
| Chr2 | 5897715 | 5898463 | 4  | 749  | 2.37E-08    |
| Chr2 | 5901069 | 5905107 | 8  | 4039 | 7.78E-08    |
| Chr2 | 5982538 | 5985135 | 6  | 2598 | 5.45E-08    |
| Chr2 | 5991145 | 5994306 | 7  | 3162 | 5.51E-08    |
| Chr2 | 5999134 | 6000356 | 5  | 1223 | 3.71E-07    |
| Chr2 | 6027074 | 6028679 | 5  | 1606 | 5.61E-08    |
| Chr2 | 6076436 | 6080371 | 8  | 3936 | 3.96E-13    |
| Chr2 | 6095913 | 6097997 | 5  | 2085 | 1.15284E-06 |
| Chr2 | 6107141 | 6109159 | 7  | 2019 | 7.72E-09    |
| Chr2 | 6111849 | 6112690 | 4  | 842  | 9.94E-07    |
| Chr2 | 6119430 | 6121100 | 5  | 1671 | 2.92E-07    |
| Chr2 | 6124277 | 6125866 | 7  | 1590 | 7.86E-12    |
| Chr2 | 6133956 | 6134742 | 4  | 787  | 1.13E-07    |
| Chr2 | 6160570 | 6162093 | 7  | 1524 | 2.14E-14    |
| Chr2 | 6255811 | 6256816 | 6  | 1006 | 4.61E-09    |
| Chr2 | 6258763 | 6259635 | 5  | 873  | 2.59E-07    |
| Chr2 | 6265535 | 6268840 | 9  | 3306 | 5.42E-11    |
| Chr2 | 6314908 | 6315283 | 7  | 376  | 6.07E-19    |
| Chr2 | 6390451 | 6391806 | 8  | 1356 | 2.68E-12    |
| Chr2 | 6507723 | 6509128 | 12 | 1406 | 5.70E-21    |
| Chr2 | 6528671 | 6530134 | 4  | 1464 | 0.000231744 |
| Chr2 | 6548684 | 6549513 | 4  | 830  | 1.16E-08    |
| Chr2 | 6770028 | 6770962 | 4  | 935  | 1.40E-07    |
| Chr2 | 6838445 | 6843341 | 14 | 4897 | 1.08E-18    |
| Chr2 | 6845767 | 6846187 | 4  | 421  | 7.01205E-07 |
| Chr2 | 6881439 | 6883902 | 6  | 2464 | 5.23E-10    |
| Chr2 | 6892303 | 6893097 | 16 | 795  | 4.40E-20    |
| Chr2 | 6942769 | 6945540 | 13 | 2772 | 3.62E-14    |
| Chr2 | 6971571 | 6972753 | 5  | 1183 | 3.30382E-06 |
| Chr2 | 6975039 | 6977587 | 4  | 2549 | 0.000113212 |
| Chr2 | 7005293 | 7005328 | 4  | 36   | 1.02994E-05 |
| Chr2 | 7007589 | 7010133 | 7  | 2545 | 2.06E-11    |
| Chr2 | 7013313 | 7019020 | 12 | 5708 | 7.52E-18    |
| Chr2 | 7067434 | 7067734 | 4  | 301  | 7.06E-08    |
| Chr2 | 7151115 | 7151994 | 5  | 880  | 3.66816E-06 |
| Chr2 | 7159929 | 7160083 | 4  | 155  | 3.14144E-06 |
| Chr2 | 7190949 | 7191426 | 16 | 478  | 1.12E-35    |
| Chr2 | 7230538 | 7233318 | 9  | 2781 | 5.03E-13    |
| Chr2 | 8040017 | 8040487 | 5  | 471  | 1.57E-10    |
| Chr2 | 8562293 | 8563770 | 6  | 1478 | 6.37E-08    |
| Chr2 | 8565273 | 8566249 | 4  | 977  | 8.37E-07    |
| Chr2 | 8575163 | 8575259 | 4  | 97   | 4.06E-07    |
| Chr2 | 8819364 | 8820624 | 4  | 1261 | 4.48E-07    |
| Chr2 | 8911214 | 8911467 | 6  | 254  | 1.72E-09    |
| Chr2 | 8948405 | 8948654 | 5  | 250  | 8.16587E-06 |
| Chr2 | 8995306 | 8998072 | 6  | 2767 | 2.61E-09    |
| Chr2 | 9123247 | 9125004 | 5  | 1758 | 1.5012E-06  |
| Chr2 | 9189820 | 9190854 | 6  | 1035 | 3.01E-08    |

|      |          |          |    |      |             |
|------|----------|----------|----|------|-------------|
| Chr2 | 9653347  | 9654688  | 5  | 1342 | 2.09E-07    |
| Chr2 | 10597555 | 10599989 | 4  | 2435 | 5.28E-08    |
| Chr2 | 10604511 | 10605493 | 4  | 983  | 5.16531E-06 |
| Chr2 | 10607708 | 10608434 | 4  | 727  | 3.19E-07    |
| Chr2 | 10875711 | 10876923 | 9  | 1213 | 5.20E-12    |
| Chr2 | 10877941 | 10880145 | 7  | 2205 | 1.85E-09    |
| Chr2 | 11325397 | 11327089 | 5  | 1693 | 2.22E-07    |
| Chr2 | 11546883 | 11547705 | 5  | 823  | 2.08813E-06 |
| Chr2 | 11952697 | 11953102 | 4  | 406  | 8.70756E-06 |
| Chr2 | 12450695 | 12451984 | 4  | 1290 | 9.60354E-05 |
| Chr2 | 12472630 | 12473239 | 4  | 610  | 0.001252191 |
| Chr2 | 14281732 | 14281814 | 4  | 83   | 5.96E-11    |
| Chr2 | 14472494 | 14472942 | 4  | 449  | 3.15135E-06 |
| Chr2 | 15405297 | 15405909 | 8  | 613  | 1.17E-29    |
| Chr2 | 15815267 | 15815464 | 4  | 198  | 3.75E-09    |
| Chr2 | 16589812 | 16590637 | 13 | 826  | 7.97E-28    |
| Chr2 | 17338114 | 17341476 | 13 | 3363 | 9.92E-18    |
| Chr2 | 17363451 | 17363679 | 4  | 229  | 2.45E-08    |
| Chr2 | 17492226 | 17492579 | 7  | 354  | 7.39E-09    |
| Chr2 | 18296060 | 18296385 | 5  | 326  | 4.53E-10    |
| Chr2 | 19320214 | 19320769 | 14 | 556  | 6.26E-30    |
| Chr3 | 347471   | 348173   | 10 | 703  | 7.38E-28    |
| Chr3 | 382003   | 382140   | 4  | 138  | 3.44E-08    |
| Chr3 | 932800   | 932935   | 5  | 136  | 1.14E-09    |
| Chr3 | 1555487  | 1556836  | 9  | 1350 | 1.45E-08    |
| Chr3 | 1559935  | 1560668  | 10 | 734  | 1.08E-12    |
| Chr3 | 1675177  | 1675326  | 4  | 150  | 1.09355E-06 |
| Chr3 | 1962150  | 1967839  | 13 | 5690 | 1.31E-13    |
| Chr3 | 2138501  | 2138933  | 4  | 433  | 6.52619E-06 |
| Chr3 | 2814210  | 2817116  | 9  | 2907 | 5.08E-09    |
| Chr3 | 4913512  | 4914279  | 13 | 768  | 2.35E-26    |
| Chr3 | 4925515  | 4925685  | 6  | 171  | 1.25E-09    |
| Chr3 | 5027680  | 5028526  | 6  | 847  | 1.62E-10    |
| Chr3 | 5249414  | 5249973  | 4  | 560  | 1.21E-08    |
| Chr3 | 5930635  | 5930653  | 5  | 19   | 3.03E-12    |
| Chr3 | 5955253  | 5955349  | 6  | 97   | 1.03E-08    |
| Chr3 | 6091378  | 6091869  | 6  | 492  | 8.80E-14    |
| Chr3 | 6470637  | 6470798  | 5  | 162  | 9.41E-10    |
| Chr3 | 7040452  | 7041361  | 4  | 910  | 3.808E-06   |
| Chr3 | 7803966  | 7805872  | 4  | 1907 | 8.23394E-06 |
| Chr3 | 8097042  | 8097214  | 6  | 173  | 4.07E-09    |
| Chr3 | 8256006  | 8256246  | 4  | 241  | 4.48623E-06 |
| Chr3 | 8385091  | 8386603  | 4  | 1513 | 5.85964E-05 |
| Chr3 | 8541399  | 8542862  | 4  | 1464 | 1.01233E-06 |
| Chr3 | 9618391  | 9620477  | 7  | 2087 | 3.34E-11    |
| Chr3 | 9692533  | 9694267  | 5  | 1735 | 8.27E-09    |
| Chr3 | 9852215  | 9852528  | 4  | 314  | 0.001700148 |
| Chr3 | 10108635 | 10110549 | 7  | 1915 | 6.17E-11    |
| Chr3 | 10478473 | 10480087 | 4  | 1615 | 2.6863E-05  |
| Chr3 | 10481124 | 10483118 | 5  | 1995 | 7.96E-07    |
| Chr3 | 10514139 | 10514939 | 6  | 801  | 7.79E-08    |
| Chr3 | 10587840 | 10587856 | 6  | 17   | 9.48E-10    |
| Chr3 | 10849339 | 10849559 | 4  | 221  | 8.93E-07    |
| Chr3 | 10885158 | 10887265 | 6  | 2108 | 5.16E-09    |
| Chr3 | 10919158 | 10920027 | 5  | 870  | 2.67E-08    |
| Chr3 | 11079226 | 11079270 | 4  | 45   | 3.84375E-07 |
| Chr3 | 11117273 | 11117763 | 6  | 491  | 6.44E-09    |
| Chr3 | 11119151 | 11120363 | 6  | 1213 | 5.74E-09    |
| Chr3 | 11177367 | 11179836 | 5  | 2470 | 7.51E-08    |
| Chr3 | 11354615 | 11356330 | 4  | 1716 | 8.49E-07    |
| Chr3 | 11387803 | 11389211 | 5  | 1409 | 3.54628E-06 |
| Chr3 | 11414006 | 11415518 | 5  | 1513 | 2.56396E-06 |
| Chr3 | 11473639 | 11474562 | 5  | 924  | 1.06444E-05 |

|      |          |          |    |      |             |
|------|----------|----------|----|------|-------------|
| Chr3 | 11491594 | 11493287 | 5  | 1694 | 1.58811E-06 |
| Chr3 | 11495789 | 11496948 | 5  | 1160 | 3.21E-07    |
| Chr3 | 11563587 | 11565773 | 7  | 2187 | 1.01E-11    |
| Chr3 | 11575027 | 11576434 | 5  | 1408 | 6.39E-07    |
| Chr3 | 11579940 | 11581128 | 7  | 1189 | 6.84E-09    |
| Chr3 | 11583394 | 11583697 | 4  | 304  | 4.94E-07    |
| Chr3 | 11633454 | 11636733 | 13 | 3280 | 1.06E-14    |
| Chr3 | 11658389 | 11658408 | 4  | 20   | 1.09083E-06 |
| Chr3 | 11681555 | 11682235 | 4  | 681  | 1.10737E-05 |
| Chr3 | 11700708 | 11701770 | 5  | 1063 | 1.20108E-06 |
| Chr3 | 11871897 | 11876013 | 8  | 4117 | 6.93E-13    |
| Chr3 | 11880224 | 11883428 | 7  | 3205 | 2.32E-10    |
| Chr3 | 11942919 | 11944150 | 5  | 1232 | 2.98E-10    |
| Chr3 | 12000614 | 12001923 | 4  | 1310 | 5.27E-07    |
| Chr3 | 12004331 | 12008271 | 7  | 3941 | 1.15E-08    |
| Chr3 | 12024045 | 12026777 | 6  | 2733 | 2.31E-10    |
| Chr3 | 12028056 | 12030775 | 6  | 2720 | 1.96E-09    |
| Chr3 | 12031890 | 12034463 | 10 | 2574 | 3.78E-12    |
| Chr3 | 12037854 | 12042698 | 11 | 4845 | 1.05E-21    |
| Chr3 | 12048384 | 12049791 | 4  | 1408 | 2.36235E-05 |
| Chr3 | 12052908 | 12054172 | 7  | 1265 | 1.90E-11    |
| Chr3 | 12069456 | 12070682 | 6  | 1227 | 3.38E-09    |
| Chr3 | 12095583 | 12096707 | 4  | 1125 | 1.76219E-06 |
| Chr3 | 12173023 | 12174681 | 4  | 1659 | 2.02811E-05 |
| Chr3 | 12175744 | 12176741 | 4  | 998  | 1.49523E-07 |
| Chr3 | 12183724 | 12184457 | 5  | 734  | 5.39E-08    |
| Chr3 | 12189797 | 12195179 | 13 | 5383 | 4.08E-14    |
| Chr3 | 12204685 | 12207994 | 10 | 3310 | 1.09E-12    |
| Chr3 | 12210977 | 12212613 | 7  | 1637 | 7.36E-08    |
| Chr3 | 12220547 | 12222721 | 10 | 2175 | 9.82E-10    |
| Chr3 | 12224257 | 12225786 | 6  | 1530 | 4.39E-09    |
| Chr3 | 12227111 | 12229063 | 5  | 1953 | 6.1317E-08  |
| Chr3 | 12250548 | 12251716 | 5  | 1169 | 1.07164E-05 |
| Chr3 | 12253234 | 12254537 | 7  | 1304 | 4.66E-07    |
| Chr3 | 12285033 | 12286255 | 5  | 1223 | 2.00E-07    |
| Chr3 | 12294771 | 12296350 | 6  | 1580 | 6.39E-08    |
| Chr3 | 12313508 | 12314335 | 8  | 828  | 6.16E-11    |
| Chr3 | 12321513 | 12323087 | 5  | 1575 | 2.45016E-06 |
| Chr3 | 12325387 | 12325771 | 4  | 385  | 3.37615E-06 |
| Chr3 | 12329068 | 12333442 | 10 | 4375 | 6.02E-14    |
| Chr3 | 12388829 | 12390615 | 4  | 1787 | 8.27E-07    |
| Chr3 | 12395499 | 12396595 | 4  | 1097 | 0.000353362 |
| Chr3 | 12401767 | 12403698 | 10 | 1932 | 1.15E-15    |
| Chr3 | 12405138 | 12406183 | 8  | 1046 | 2.09E-10    |
| Chr3 | 12426758 | 12428821 | 6  | 2064 | 1.29E-09    |
| Chr3 | 12430674 | 12432705 | 5  | 2032 | 1.52273E-05 |
| Chr3 | 12434251 | 12435839 | 7  | 1589 | 1.87E-09    |
| Chr3 | 12444733 | 12447790 | 6  | 3058 | 8.38E-07    |
| Chr3 | 12461543 | 12465363 | 14 | 3821 | 8.72E-14    |
| Chr3 | 12473662 | 12474447 | 6  | 786  | 4.70E-08    |
| Chr3 | 12479988 | 12482480 | 6  | 2493 | 5.86E-12    |
| Chr3 | 12484871 | 12485090 | 4  | 220  | 3.98E-08    |
| Chr3 | 12515248 | 12516479 | 5  | 1232 | 3.88742E-05 |
| Chr3 | 12519664 | 12522030 | 12 | 2367 | 3.23E-14    |
| Chr3 | 12524425 | 12525988 | 4  | 1564 | 6.71E-08    |
| Chr3 | 12538900 | 12539256 | 5  | 357  | 2.57676E-07 |
| Chr3 | 12540628 | 12541139 | 5  | 512  | 1.03E-08    |
| Chr3 | 12542850 | 12544390 | 4  | 1541 | 2.03352E-05 |
| Chr3 | 12545413 | 12546974 | 5  | 1562 | 8.51E-07    |
| Chr3 | 12548098 | 12549176 | 4  | 1079 | 2.87799E-05 |
| Chr3 | 12550610 | 12552567 | 4  | 1958 | 2.64935E-05 |
| Chr3 | 12556773 | 12557894 | 7  | 1122 | 4.12E-09    |
| Chr3 | 12560319 | 12561688 | 5  | 1370 | 1.57E-07    |

|      |          |          |    |      |             |
|------|----------|----------|----|------|-------------|
| Chr3 | 12576643 | 12577608 | 4  | 966  | 4.95633E-06 |
| Chr3 | 12580896 | 12582257 | 6  | 1362 | 6.86E-08    |
| Chr3 | 12602886 | 12604716 | 4  | 1831 | 2.35197E-06 |
| Chr3 | 12698490 | 12699688 | 4  | 1199 | 3.57909E-06 |
| Chr3 | 12701623 | 12703690 | 7  | 2068 | 2.37E-09    |
| Chr3 | 12716234 | 12718460 | 7  | 2227 | 2.52E-10    |
| Chr3 | 12764636 | 12765399 | 4  | 764  | 2.80E-07    |
| Chr3 | 12781674 | 12783385 | 4  | 1712 | 7.02967E-05 |
| Chr3 | 12799696 | 12801962 | 5  | 2267 | 2.43E-07    |
| Chr3 | 12824796 | 12828016 | 8  | 3221 | 3.19E-14    |
| Chr3 | 12839096 | 12841378 | 5  | 2283 | 2.15026E-06 |
| Chr3 | 12856005 | 12858377 | 5  | 2373 | 1.45E-08    |
| Chr3 | 12922426 | 12923500 | 4  | 1075 | 7.22763E-05 |
| Chr3 | 12925087 | 12928445 | 6  | 3359 | 5.14E-10    |
| Chr3 | 12935100 | 12936474 | 5  | 1375 | 1.58704E-06 |
| Chr3 | 12937558 | 12939265 | 6  | 1708 | 4.54E-10    |
| Chr3 | 12944037 | 12946776 | 6  | 2740 | 2.98E-10    |
| Chr3 | 12949417 | 12950850 | 5  | 1434 | 5.60E-09    |
| Chr3 | 12958092 | 12958607 | 4  | 516  | 1.71787E-05 |
| Chr3 | 12984783 | 12987929 | 9  | 3147 | 5.67E-10    |
| Chr3 | 12989058 | 12990452 | 4  | 1395 | 4.06322E-07 |
| Chr3 | 12992122 | 12993296 | 4  | 1175 | 1.69E-08    |
| Chr3 | 13017209 | 13018879 | 4  | 1671 | 1.23218E-06 |
| Chr3 | 13025223 | 13025642 | 4  | 420  | 3.49E-07    |
| Chr3 | 13084874 | 13086597 | 4  | 1724 | 4.66729E-06 |
| Chr3 | 13087971 | 13090717 | 7  | 2747 | 1.94E-09    |
| Chr3 | 13092576 | 13092832 | 4  | 257  | 3.42539E-06 |
| Chr3 | 13097386 | 13101155 | 13 | 3770 | 2.22E-17    |
| Chr3 | 13113371 | 13116958 | 8  | 3588 | 2.49E-11    |
| Chr3 | 13148649 | 13149876 | 5  | 1228 | 8.11E-10    |
| Chr3 | 13175518 | 13176461 | 4  | 944  | 3.69E-08    |
| Chr3 | 13190569 | 13193093 | 9  | 2525 | 3.10E-15    |
| Chr3 | 13194200 | 13195471 | 4  | 1272 | 4.36637E-05 |
| Chr3 | 13205371 | 13206396 | 4  | 1026 | 6.59028E-06 |
| Chr3 | 13214296 | 13215590 | 5  | 1295 | 9.67E-08    |
| Chr3 | 13244741 | 13246056 | 4  | 1316 | 3.28E-07    |
| Chr3 | 13285492 | 13287182 | 5  | 1691 | 4.02E-08    |
| Chr3 | 13322301 | 13323928 | 4  | 1628 | 3.69771E-06 |
| Chr3 | 13333522 | 13334008 | 4  | 487  | 6.92E-07    |
| Chr3 | 13353307 | 13354392 | 4  | 1086 | 4.39654E-06 |
| Chr3 | 13364005 | 13367540 | 11 | 3536 | 4.16E-12    |
| Chr3 | 13381494 | 13383394 | 5  | 1901 | 6.49697E-06 |
| Chr3 | 13389907 | 13390038 | 4  | 132  | 5.57024E-06 |
| Chr3 | 13405056 | 13407229 | 7  | 2174 | 1.45E-11    |
| Chr3 | 13409665 | 13412899 | 9  | 3235 | 1.21E-10    |
| Chr3 | 13415472 | 13416685 | 7  | 1214 | 9.21E-12    |
| Chr3 | 13417878 | 13421522 | 13 | 3645 | 6.31E-18    |
| Chr3 | 13425331 | 13426420 | 4  | 1090 | 1.30308E-06 |
| Chr3 | 13429518 | 13431040 | 4  | 1523 | 9.73251E-05 |
| Chr3 | 13435469 | 13437041 | 6  | 1573 | 1.28E-09    |
| Chr3 | 13438694 | 13441389 | 8  | 2696 | 1.39E-11    |
| Chr3 | 13445736 | 13447976 | 13 | 2241 | 2.70E-16    |
| Chr3 | 13456169 | 13458077 | 6  | 1909 | 1.48E-09    |
| Chr3 | 13468346 | 13470145 | 5  | 1800 | 1.57346E-06 |
| Chr3 | 13477081 | 13479216 | 10 | 2136 | 2.16E-14    |
| Chr3 | 13515946 | 13516705 | 4  | 760  | 5.92947E-06 |
| Chr3 | 13523750 | 13524115 | 4  | 366  | 1.73986E-06 |
| Chr3 | 13550848 | 13551583 | 5  | 736  | 1.06E-07    |
| Chr3 | 13554922 | 13556249 | 4  | 1328 | 2.02136E-05 |
| Chr3 | 13559722 | 13565880 | 14 | 6159 | 2.25E-18    |
| Chr3 | 13571502 | 13572646 | 5  | 1145 | 3.67E-08    |
| Chr3 | 13576590 | 13577545 | 6  | 956  | 1.30E-09    |
| Chr3 | 13579111 | 13581463 | 5  | 2353 | 3.58E-09    |

|      |          |          |    |      |             |
|------|----------|----------|----|------|-------------|
| Chr3 | 13586110 | 13587734 | 13 | 1625 | 5.19E-08    |
| Chr3 | 13588831 | 13592511 | 52 | 3681 | 4.26E-197   |
| Chr3 | 13593549 | 13599066 | 26 | 5518 | 7.20E-22    |
| Chr3 | 13600252 | 13601481 | 4  | 1230 | 1.42687E-05 |
| Chr3 | 13608671 | 13610133 | 5  | 1463 | 4.37946E-06 |
| Chr3 | 13612949 | 13613925 | 4  | 977  | 4.11215E-05 |
| Chr3 | 13618073 | 13619060 | 4  | 988  | 4.49E-07    |
| Chr3 | 13620585 | 13623036 | 13 | 2452 | 5.32E-19    |
| Chr3 | 13624604 | 13626505 | 5  | 1902 | 1.07E-09    |
| Chr3 | 13638370 | 13639980 | 8  | 1611 | 2.74E-09    |
| Chr3 | 13644759 | 13649589 | 14 | 4831 | 3.93E-18    |
| Chr3 | 13652338 | 13656759 | 12 | 4422 | 2.30E-13    |
| Chr3 | 13659867 | 13662482 | 6  | 2616 | 2.00341E-06 |
| Chr3 | 13664697 | 13668136 | 7  | 3440 | 1.75E-10    |
| Chr3 | 13678167 | 13679204 | 5  | 1038 | 5.58E-08    |
| Chr3 | 13681836 | 13685510 | 13 | 3675 | 1.68E-15    |
| Chr3 | 13693221 | 13693430 | 5  | 210  | 3.29E-07    |
| Chr3 | 13699364 | 13700400 | 6  | 1037 | 2.26E-10    |
| Chr3 | 13705945 | 13708533 | 13 | 2589 | 1.02E-10    |
| Chr3 | 13709626 | 13710963 | 20 | 1338 | 2.56E-23    |
| Chr3 | 13712323 | 13713405 | 6  | 1083 | 3.47E-07    |
| Chr3 | 13737030 | 13737750 | 6  | 721  | 3.21E-08    |
| Chr3 | 13738916 | 13741644 | 6  | 2729 | 9.92E-09    |
| Chr3 | 13742736 | 13744017 | 5  | 1282 | 2.52309E-06 |
| Chr3 | 13746328 | 13746889 | 5  | 562  | 2.75E-09    |
| Chr3 | 13750219 | 13751164 | 4  | 946  | 9.00678E-05 |
| Chr3 | 13756148 | 13756930 | 6  | 783  | 2.66502E-06 |
| Chr3 | 13770891 | 13772265 | 6  | 1375 | 5.0875E-06  |
| Chr3 | 13779140 | 13779951 | 6  | 812  | 2.62E-07    |
| Chr3 | 13794126 | 13795804 | 6  | 1679 | 6.21E-08    |
| Chr3 | 13803495 | 13805718 | 8  | 2224 | 3.59E-10    |
| Chr3 | 13809422 | 13811162 | 11 | 1741 | 4.43E-10    |
| Chr3 | 13812240 | 13816708 | 52 | 4469 | 1.61E-45    |
| Chr3 | 13819052 | 13822262 | 10 | 3211 | 1.66E-13    |
| Chr3 | 13826465 | 13835215 | 22 | 8751 | 1.30E-23    |
| Chr3 | 13838858 | 13840776 | 17 | 1919 | 1.53E-19    |
| Chr3 | 13853827 | 13853982 | 19 | 156  | 4.31E-27    |
| Chr3 | 13865851 | 13866789 | 4  | 939  | 1.36606E-05 |
| Chr3 | 13869862 | 13871817 | 7  | 1956 | 2.22E-09    |
| Chr3 | 13893596 | 13895142 | 4  | 1547 | 2.55118E-06 |
| Chr3 | 13899687 | 13902879 | 6  | 3193 | 3.88E-07    |
| Chr3 | 13928406 | 13930622 | 6  | 2217 | 3.94E-08    |
| Chr3 | 13937125 | 13939708 | 8  | 2584 | 8.37E-13    |
| Chr3 | 13946672 | 13947598 | 4  | 927  | 1.81E-08    |
| Chr3 | 13950092 | 13951970 | 8  | 1879 | 2.56E-08    |
| Chr3 | 13964539 | 13966633 | 5  | 2095 | 4.8446E-06  |
| Chr3 | 13970000 | 13970986 | 5  | 987  | 5.50578E-06 |
| Chr3 | 13973093 | 13974570 | 4  | 1478 | 5.08E-07    |
| Chr3 | 13980477 | 13983718 | 8  | 3242 | 2.02E-13    |
| Chr3 | 13998324 | 14000386 | 7  | 2063 | 6.61E-09    |
| Chr3 | 14011620 | 14012749 | 5  | 1130 | 6.69E-07    |
| Chr3 | 14025863 | 14026813 | 5  | 951  | 1.58E-08    |
| Chr3 | 14033536 | 14035274 | 6  | 1739 | 4.59E-10    |
| Chr3 | 14066513 | 14069368 | 8  | 2856 | 1.44E-12    |
| Chr3 | 14106479 | 14107836 | 8  | 1358 | 5.52E-13    |
| Chr3 | 14124955 | 14125874 | 4  | 920  | 2.52833E-05 |
| Chr3 | 14149529 | 14150387 | 5  | 859  | 2.74E-08    |
| Chr3 | 14158443 | 14160165 | 5  | 1723 | 4.35E-07    |
| Chr3 | 14163030 | 14163727 | 4  | 698  | 7.40561E-05 |
| Chr3 | 14165372 | 14168968 | 11 | 3597 | 5.91E-12    |
| Chr3 | 14171864 | 14174072 | 14 | 2209 | 5.59E-15    |
| Chr3 | 14179381 | 14181621 | 31 | 2241 | 2.72E-32    |
| Chr3 | 14185627 | 14187188 | 37 | 1562 | 2.72E-47    |

|      |          |          |     |      |             |
|------|----------|----------|-----|------|-------------|
| Chr3 | 14190210 | 14190851 | 7   | 642  | 5.09E-09    |
| Chr3 | 14195608 | 14199834 | 158 | 4227 | 0           |
| Chr3 | 14200860 | 14204077 | 199 | 3218 | 0           |
| Chr3 | 14205291 | 14208913 | 113 | 3623 | 1.73E-98    |
| Chr3 | 14210218 | 14217107 | 51  | 6890 | 3.72E-45    |
| Chr3 | 14218290 | 14220561 | 19  | 2272 | 3.09E-25    |
| Chr3 | 14221790 | 14225908 | 41  | 4119 | 5.01E-34    |
| Chr3 | 14241346 | 14246039 | 14  | 4694 | 9.40E-23    |
| Chr3 | 14250042 | 14251502 | 5   | 1461 | 3.14967E-06 |
| Chr3 | 14258247 | 14259149 | 6   | 903  | 1.47E-08    |
| Chr3 | 14262153 | 14263466 | 7   | 1314 | 1.42E-11    |
| Chr3 | 14293065 | 14293754 | 4   | 690  | 6.99091E-06 |
| Chr3 | 14337270 | 14337958 | 4   | 689  | 8.16E-08    |
| Chr3 | 14339081 | 14339249 | 4   | 169  | 0.000174524 |
| Chr3 | 14365982 | 14366839 | 4   | 858  | 4.35504E-05 |
| Chr3 | 14375530 | 14377934 | 5   | 2405 | 6.67E-07    |
| Chr3 | 14389443 | 14390366 | 5   | 924  | 3.27E-08    |
| Chr3 | 14393077 | 14394535 | 5   | 1459 | 8.79E-07    |
| Chr3 | 14409884 | 14413215 | 10  | 3332 | 4.48E-14    |
| Chr3 | 14422019 | 14424616 | 5   | 2598 | 8.01E-08    |
| Chr3 | 14426289 | 14430502 | 9   | 4214 | 2.00E-10    |
| Chr3 | 14435315 | 14437137 | 5   | 1823 | 3.65141E-06 |
| Chr3 | 14438643 | 14442126 | 10  | 3484 | 8.62E-11    |
| Chr3 | 14449200 | 14450584 | 6   | 1385 | 6.44E-08    |
| Chr3 | 14467161 | 14467690 | 4   | 530  | 4.92E-07    |
| Chr3 | 14485557 | 14487172 | 6   | 1616 | 5.56E-08    |
| Chr3 | 14494790 | 14496807 | 6   | 2018 | 9.83E-12    |
| Chr3 | 14498984 | 14501812 | 6   | 2829 | 3.70E-09    |
| Chr3 | 14521095 | 14522936 | 4   | 1842 | 1.61E-07    |
| Chr3 | 14541044 | 14541483 | 6   | 440  | 8.06E-09    |
| Chr3 | 14544371 | 14545605 | 5   | 1235 | 6.60945E-06 |
| Chr3 | 14546672 | 14551571 | 20  | 4900 | 6.35E-21    |
| Chr3 | 14552636 | 14553290 | 4   | 655  | 4.90825E-06 |
| Chr3 | 14556072 | 14558618 | 8   | 2547 | 2.03E-09    |
| Chr3 | 14564672 | 14569250 | 12  | 4579 | 3.13E-10    |
| Chr3 | 14579834 | 14583003 | 7   | 3170 | 1.02E-10    |
| Chr3 | 14616549 | 14617500 | 4   | 952  | 7.61E-08    |
| Chr3 | 14620790 | 14623006 | 5   | 2217 | 5.84E-08    |
| Chr3 | 14638157 | 14638772 | 6   | 616  | 2.47E-08    |
| Chr3 | 14642579 | 14644247 | 4   | 1669 | 6.18E-07    |
| Chr3 | 14657352 | 14659258 | 6   | 1907 | 1.45E-07    |
| Chr3 | 14661445 | 14662386 | 7   | 942  | 1.42E-10    |
| Chr3 | 14702267 | 14703101 | 6   | 835  | 1.91E-11    |
| Chr3 | 14706488 | 14713281 | 13  | 6794 | 2.82E-17    |
| Chr3 | 14715856 | 14719252 | 9   | 3397 | 1.71E-13    |
| Chr3 | 14729221 | 14731223 | 6   | 2003 | 6.05E-11    |
| Chr3 | 14739409 | 14740058 | 5   | 650  | 1.00976E-05 |
| Chr3 | 14742843 | 14744785 | 6   | 1943 | 6.44E-11    |
| Chr3 | 14762324 | 14762981 | 4   | 658  | 1.40301E-06 |
| Chr3 | 14774593 | 14775636 | 5   | 1044 | 1.13916E-07 |
| Chr3 | 14781948 | 14783048 | 8   | 1101 | 1.25E-11    |
| Chr3 | 14786483 | 14787227 | 4   | 745  | 5.28E-08    |
| Chr3 | 14788867 | 14789319 | 4   | 453  | 4.90054E-06 |
| Chr3 | 14794816 | 14798777 | 16  | 3962 | 1.69E-22    |
| Chr3 | 14820532 | 14823724 | 7   | 3193 | 1.78E-08    |
| Chr3 | 14828381 | 14830244 | 5   | 1864 | 7.74E-08    |
| Chr3 | 14838465 | 14841388 | 11  | 2924 | 4.92E-12    |
| Chr3 | 14847098 | 14847839 | 4   | 742  | 2.07025E-06 |
| Chr3 | 14861359 | 14863638 | 13  | 2280 | 2.90E-18    |
| Chr3 | 14871828 | 14872143 | 4   | 316  | 5.67712E-06 |
| Chr3 | 14894200 | 14894827 | 4   | 628  | 1.65472E-06 |
| Chr3 | 14924377 | 14925409 | 4   | 1033 | 6.12E-07    |
| Chr3 | 14977304 | 14979476 | 6   | 2173 | 4.61E-07    |

|      |          |          |    |      |             |
|------|----------|----------|----|------|-------------|
| Chr3 | 14980960 | 14982717 | 6  | 1758 | 7.14E-08    |
| Chr3 | 14984924 | 14986751 | 7  | 1828 | 4.65E-12    |
| Chr3 | 15000579 | 15002672 | 5  | 2094 | 5.16928E-06 |
| Chr3 | 15035270 | 15036913 | 8  | 1644 | 7.64E-14    |
| Chr3 | 15042568 | 15043947 | 4  | 1380 | 7.65262E-05 |
| Chr3 | 15045256 | 15047627 | 10 | 2372 | 2.10E-13    |
| Chr3 | 15056281 | 15058450 | 5  | 2170 | 5.78E-07    |
| Chr3 | 15064531 | 15066084 | 4  | 1554 | 0.000417032 |
| Chr3 | 15105545 | 15110280 | 11 | 4736 | 2.05E-12    |
| Chr3 | 15113926 | 15115110 | 5  | 1185 | 2.80E-07    |
| Chr3 | 15127885 | 15128524 | 4  | 640  | 6.4433E-05  |
| Chr3 | 15137479 | 15140729 | 10 | 3251 | 6.88E-17    |
| Chr3 | 15141985 | 15148877 | 19 | 6893 | 9.50E-25    |
| Chr3 | 15154301 | 15155358 | 5  | 1058 | 5.92E-09    |
| Chr3 | 15161204 | 15162611 | 5  | 1408 | 4.88E-07    |
| Chr3 | 15251027 | 15251718 | 7  | 692  | 2.95E-10    |
| Chr3 | 15252861 | 15254260 | 9  | 1400 | 6.18E-11    |
| Chr3 | 15258605 | 15259636 | 4  | 1032 | 8.04011E-05 |
| Chr3 | 15261117 | 15261434 | 4  | 318  | 6.63099E-06 |
| Chr3 | 15263340 | 15264289 | 4  | 950  | 1.09025E-05 |
| Chr3 | 15300592 | 15304789 | 13 | 4198 | 1.53E-18    |
| Chr3 | 15305971 | 15306214 | 4  | 244  | 8.17E-07    |
| Chr3 | 15318173 | 15320205 | 4  | 2033 | 7.33056E-05 |
| Chr3 | 15325157 | 15325721 | 4  | 565  | 2.85795E-06 |
| Chr3 | 15328151 | 15328806 | 4  | 656  | 3.2714E-06  |
| Chr3 | 15331009 | 15331399 | 6  | 391  | 3.15E-08    |
| Chr3 | 15364320 | 15365410 | 5  | 1091 | 1.41E-09    |
| Chr3 | 15374907 | 15377816 | 8  | 2910 | 3.42E-10    |
| Chr3 | 15385899 | 15386985 | 4  | 1087 | 3.25054E-05 |
| Chr3 | 15412090 | 15412964 | 4  | 875  | 1.23E-08    |
| Chr3 | 15444731 | 15446198 | 4  | 1468 | 9.02053E-05 |
| Chr3 | 15459694 | 15460709 | 4  | 1016 | 1.76646E-06 |
| Chr3 | 15461872 | 15464273 | 7  | 2402 | 3.55E-09    |
| Chr3 | 15479065 | 15480801 | 5  | 1737 | 3.06E-08    |
| Chr3 | 15488338 | 15489825 | 4  | 1488 | 3.77E-07    |
| Chr3 | 15496421 | 15499217 | 6  | 2797 | 5.01008E-06 |
| Chr3 | 15501160 | 15501376 | 4  | 217  | 3.34765E-05 |
| Chr3 | 15507917 | 15509035 | 6  | 1119 | 3.50E-08    |
| Chr3 | 15528248 | 15530828 | 4  | 2581 | 1.19004E-06 |
| Chr3 | 15534682 | 15535798 | 5  | 1117 | 1.61733E-05 |
| Chr3 | 15549176 | 15550897 | 4  | 1722 | 7.83E-07    |
| Chr3 | 15572965 | 15573636 | 4  | 672  | 3.76904E-06 |
| Chr3 | 15580810 | 15583139 | 8  | 2330 | 9.83E-09    |
| Chr3 | 15589156 | 15594008 | 12 | 4853 | 9.40E-13    |
| Chr3 | 15595630 | 15596593 | 6  | 964  | 6.52092E-06 |
| Chr3 | 15621687 | 15623052 | 4  | 1366 | 3.87408E-06 |
| Chr3 | 15635166 | 15636231 | 4  | 1066 | 2.04465E-05 |
| Chr3 | 15688007 | 15688400 | 5  | 394  | 3.33962E-06 |
| Chr3 | 15693103 | 15694100 | 5  | 998  | 1.14E-07    |
| Chr3 | 15715934 | 15720116 | 22 | 4183 | 1.32E-25    |
| Chr3 | 15848553 | 15851643 | 9  | 3091 | 6.48E-11    |
| Chr3 | 15915906 | 15916169 | 4  | 264  | 4.49471E-06 |
| Chr3 | 15962732 | 15964955 | 4  | 2224 | 4.60E-07    |
| Chr3 | 15997858 | 15999463 | 4  | 1606 | 0.000165325 |
| Chr3 | 16011239 | 16011372 | 7  | 134  | 9.90E-11    |
| Chr3 | 16070792 | 16071652 | 5  | 861  | 2.24E-07    |
| Chr3 | 16159022 | 16161672 | 8  | 2651 | 5.20E-10    |
| Chr3 | 16248674 | 16249113 | 4  | 440  | 1.57352E-06 |
| Chr3 | 16526176 | 16528996 | 20 | 2821 | 4.92E-27    |
| Chr3 | 16590407 | 16591795 | 9  | 1389 | 1.25E-10    |
| Chr3 | 16594744 | 16595875 | 5  | 1132 | 1.07772E-05 |
| Chr3 | 16694843 | 16696964 | 7  | 2122 | 1.80E-11    |
| Chr3 | 16829952 | 16830803 | 4  | 852  | 3.83027E-06 |



|      |          |          |    |      |             |
|------|----------|----------|----|------|-------------|
| Chr3 | 16958918 | 16961570 | 5  | 2653 | 2.16E-07    |
| Chr3 | 17057063 | 17057952 | 4  | 890  | 5.92337E-05 |
| Chr3 | 17430571 | 17433026 | 6  | 2456 | 6.67E-08    |
| Chr3 | 17472698 | 17472821 | 4  | 124  | 3.49398E-05 |
| Chr3 | 17981442 | 17983845 | 6  | 2404 | 1.66E-09    |
| Chr3 | 18359732 | 18360709 | 4  | 978  | 1.8127E-06  |
| Chr3 | 18794155 | 18795384 | 9  | 1230 | 1.95E-12    |
| Chr3 | 18860986 | 18861144 | 4  | 159  | 9.70E-07    |
| Chr3 | 20304738 | 20305822 | 5  | 1085 | 1.15E-07    |
| Chr3 | 20485236 | 20486002 | 4  | 767  | 8.59E-09    |
| Chr3 | 22124066 | 22124633 | 4  | 568  | 6.18E-26    |
| Chr3 | 22696991 | 22697028 | 4  | 38   | 1.82E-08    |
| Chr3 | 23108925 | 23109685 | 4  | 761  | 3.32866E-07 |
| Chr3 | 23376255 | 23376312 | 5  | 58   | 4.03E-09    |
| Chr3 | 23408999 | 23410006 | 6  | 1008 | 3.37E-10    |
| Chr4 | 226396   | 226695   | 5  | 300  | 9.13E-26    |
| Chr4 | 331390   | 331641   | 8  | 252  | 3.69E-14    |
| Chr4 | 631203   | 633109   | 9  | 1907 | 3.95E-11    |
| Chr4 | 634170   | 636827   | 10 | 2658 | 1.82E-12    |
| Chr4 | 782475   | 783256   | 4  | 782  | 4.12543E-06 |
| Chr4 | 861949   | 863637   | 5  | 1689 | 8.05E-08    |
| Chr4 | 1230840  | 1232543  | 9  | 1704 | 6.96E-13    |
| Chr4 | 1314673  | 1315537  | 5  | 865  | 4.41E-08    |
| Chr4 | 1455391  | 1456361  | 4  | 971  | 1.27054E-05 |
| Chr4 | 1593053  | 1594335  | 4  | 1283 | 8.10278E-06 |
| Chr4 | 1596236  | 1597117  | 6  | 882  | 1.48E-08    |
| Chr4 | 1620082  | 1620552  | 4  | 471  | 5.48E-08    |
| Chr4 | 1621934  | 1622825  | 4  | 892  | 2.4196E-06  |
| Chr4 | 1668952  | 1669868  | 5  | 917  | 3.99749E-06 |
| Chr4 | 1673775  | 1675203  | 6  | 1429 | 7.90E-07    |
| Chr4 | 1676441  | 1677949  | 4  | 1509 | 4.19281E-06 |
| Chr4 | 1682344  | 1685373  | 7  | 3030 | 1.61E-09    |
| Chr4 | 1686546  | 1687654  | 4  | 1109 | 4.41111E-05 |
| Chr4 | 1691803  | 1694252  | 11 | 2450 | 8.58E-14    |
| Chr4 | 1696183  | 1698643  | 9  | 2461 | 1.27E-12    |
| Chr4 | 1787533  | 1789015  | 6  | 1483 | 4.65E-07    |
| Chr4 | 1792128  | 1792609  | 5  | 482  | 1.36726E-06 |
| Chr4 | 1796373  | 1797315  | 5  | 943  | 1.70E-07    |
| Chr4 | 1798402  | 1798701  | 4  | 300  | 3.12433E-06 |
| Chr4 | 1803351  | 1806775  | 13 | 3425 | 2.85E-20    |
| Chr4 | 1815752  | 1817679  | 6  | 1928 | 9.79E-10    |
| Chr4 | 1825192  | 1826642  | 5  | 1451 | 4.22E-07    |
| Chr4 | 1844512  | 1845939  | 4  | 1428 | 2.24E-09    |
| Chr4 | 1859718  | 1860795  | 7  | 1078 | 8.87E-11    |
| Chr4 | 1914851  | 1916204  | 4  | 1354 | 1.3626E-06  |
| Chr4 | 1918561  | 1919867  | 4  | 1307 | 5.40372E-06 |
| Chr4 | 1921300  | 1924617  | 11 | 3318 | 3.36E-15    |
| Chr4 | 1936824  | 1938395  | 6  | 1572 | 1.78E-08    |
| Chr4 | 1950995  | 1951955  | 4  | 961  | 6.40E-07    |
| Chr4 | 1953265  | 1954698  | 5  | 1434 | 4.69E-08    |
| Chr4 | 1978624  | 1981131  | 5  | 2508 | 7.60885E-06 |
| Chr4 | 2000903  | 2002273  | 4  | 1371 | 8.62E-07    |
| Chr4 | 2004058  | 2007486  | 10 | 3429 | 2.05E-13    |
| Chr4 | 2013686  | 2014130  | 4  | 445  | 4.70991E-05 |
| Chr4 | 2018192  | 2020230  | 7  | 2039 | 1.57E-10    |
| Chr4 | 2041083  | 2042699  | 5  | 1617 | 0.000303966 |
| Chr4 | 2068521  | 2071347  | 6  | 2827 | 1.08E-07    |
| Chr4 | 2117615  | 2117631  | 4  | 17   | 1.30E-10    |
| Chr4 | 2139485  | 2142835  | 10 | 3351 | 1.20133E-08 |
| Chr4 | 2191520  | 2193761  | 4  | 2242 | 1.80E-07    |
| Chr4 | 2202187  | 2203366  | 4  | 1180 | 4.60537E-05 |
| Chr4 | 2233659  | 2233858  | 5  | 200  | 4.86E-09    |
| Chr4 | 2245593  | 2246793  | 4  | 1201 | 9.54316E-05 |

|      |         |         |    |      |             |
|------|---------|---------|----|------|-------------|
| Chr4 | 2249662 | 2250303 | 4  | 642  | 3.48E-08    |
| Chr4 | 2255050 | 2257612 | 5  | 2563 | 1.53E-08    |
| Chr4 | 2273436 | 2273774 | 4  | 339  | 7.83029E-06 |
| Chr4 | 2280464 | 2282115 | 7  | 1652 | 2.79E-08    |
| Chr4 | 2287511 | 2288654 | 10 | 1144 | 1.29E-12    |
| Chr4 | 2292276 | 2292649 | 4  | 374  | 2.49532E-05 |
| Chr4 | 2303836 | 2305449 | 5  | 1614 | 1.66E-07    |
| Chr4 | 2326012 | 2326451 | 15 | 440  | 3.06E-44    |
| Chr4 | 2348285 | 2348720 | 4  | 436  | 1.30081E-06 |
| Chr4 | 2361815 | 2364505 | 8  | 2691 | 1.04E-09    |
| Chr4 | 2533934 | 2534389 | 6  | 456  | 4.60E-12    |
| Chr4 | 2597078 | 2598883 | 8  | 1806 | 4.66E-09    |
| Chr4 | 2643722 | 2644868 | 5  | 1147 | 2.33928E-05 |
| Chr4 | 2709178 | 2710820 | 5  | 1643 | 4.37925E-06 |
| Chr4 | 2834132 | 2837197 | 7  | 3066 | 4.50E-11    |
| Chr4 | 2865826 | 2866362 | 4  | 537  | 8.34298E-06 |
| Chr4 | 2869009 | 2869921 | 4  | 913  | 3.06412E-05 |
| Chr4 | 2870977 | 2871991 | 5  | 1015 | 6.04E-07    |
| Chr4 | 2873517 | 2875023 | 6  | 1507 | 9.44E-09    |
| Chr4 | 2878602 | 2881572 | 11 | 2971 | 1.43E-13    |
| Chr4 | 2890251 | 2891878 | 5  | 1628 | 1.87E-07    |
| Chr4 | 2893048 | 2893644 | 5  | 597  | 1.67E-07    |
| Chr4 | 2898899 | 2899859 | 4  | 961  | 7.22E-08    |
| Chr4 | 2910753 | 2912910 | 5  | 2158 | 1.59E-07    |
| Chr4 | 2915436 | 2916621 | 4  | 1186 | 1.20E-08    |
| Chr4 | 2920475 | 2920862 | 6  | 388  | 2.65E-08    |
| Chr4 | 2967071 | 2970140 | 11 | 3070 | 1.92E-17    |
| Chr4 | 2973187 | 2976066 | 9  | 2880 | 2.49E-12    |
| Chr4 | 3017183 | 3019017 | 5  | 1835 | 3.79E-09    |
| Chr4 | 3023424 | 3024963 | 5  | 1540 | 5.16357E-06 |
| Chr4 | 3047624 | 3049145 | 4  | 1522 | 1.82E-09    |
| Chr4 | 3054346 | 3056871 | 71 | 2526 | 9.39E-58    |
| Chr4 | 3061072 | 3062411 | 21 | 1340 | 1.60E-24    |
| Chr4 | 3071425 | 3072008 | 4  | 584  | 3.07E-07    |
| Chr4 | 3074454 | 3075952 | 4  | 1499 | 3.80432E-06 |
| Chr4 | 3079750 | 3083476 | 14 | 3727 | 7.16E-19    |
| Chr4 | 3086182 | 3087335 | 4  | 1154 | 4.9576E-07  |
| Chr4 | 3088854 | 3093950 | 15 | 5097 | 2.12E-20    |
| Chr4 | 3095278 | 3096417 | 5  | 1140 | 1.69E-08    |
| Chr4 | 3102582 | 3102719 | 4  | 138  | 8.78163E-06 |
| Chr4 | 3109376 | 3110869 | 5  | 1494 | 1.24E-09    |
| Chr4 | 3116918 | 3118359 | 6  | 1442 | 1.47E-08    |
| Chr4 | 3126393 | 3127989 | 5  | 1597 | 1.22E-07    |
| Chr4 | 3135134 | 3137828 | 7  | 2695 | 1.61E-10    |
| Chr4 | 3156701 | 3160061 | 8  | 3361 | 2.42E-10    |
| Chr4 | 3164129 | 3166655 | 9  | 2527 | 4.18E-13    |
| Chr4 | 3176982 | 3178081 | 4  | 1100 | 1.15491E-06 |
| Chr4 | 3180224 | 3181553 | 4  | 1330 | 4.93072E-06 |
| Chr4 | 3187405 | 3189117 | 5  | 1713 | 4.94326E-06 |
| Chr4 | 3263894 | 3265783 | 6  | 1890 | 8.24E-10    |
| Chr4 | 3268420 | 3269239 | 6  | 820  | 2.05E-10    |
| Chr4 | 3270340 | 3272808 | 14 | 2469 | 1.12E-21    |
| Chr4 | 3275656 | 3280911 | 16 | 5256 | 8.37E-19    |
| Chr4 | 3288901 | 3290317 | 4  | 1417 | 1.48489E-05 |
| Chr4 | 3317941 | 3319451 | 6  | 1511 | 7.54524E-06 |
| Chr4 | 3341512 | 3343570 | 6  | 2059 | 2.23043E-06 |
| Chr4 | 3349415 | 3351566 | 7  | 2152 | 1.25E-08    |
| Chr4 | 3353603 | 3354473 | 4  | 871  | 1.11035E-05 |
| Chr4 | 3364497 | 3367314 | 7  | 2818 | 3.65E-08    |
| Chr4 | 3372957 | 3373620 | 4  | 664  | 5.26894E-06 |
| Chr4 | 3383053 | 3384422 | 5  | 1370 | 2.69E-07    |
| Chr4 | 3386340 | 3388783 | 6  | 2444 | 6.04E-07    |
| Chr4 | 3389967 | 3391315 | 5  | 1349 | 4.92E-08    |

|      |         |         |    |      |             |
|------|---------|---------|----|------|-------------|
| Chr4 | 3396577 | 3398234 | 4  | 1658 | 0.018321304 |
| Chr4 | 3416354 | 3417452 | 5  | 1099 | 2.06989E-06 |
| Chr4 | 3431945 | 3433094 | 5  | 1150 | 7.26E-10    |
| Chr4 | 3434144 | 3435446 | 7  | 1303 | 5.41E-10    |
| Chr4 | 3470321 | 3470774 | 4  | 454  | 6.66E-08    |
| Chr4 | 3487900 | 3490362 | 7  | 2463 | 6.05E-08    |
| Chr4 | 3491678 | 3500751 | 24 | 9074 | 8.01E-29    |
| Chr4 | 3507529 | 3510090 | 5  | 2562 | 4.93E-10    |
| Chr4 | 3540754 | 3542771 | 9  | 2018 | 2.48E-12    |
| Chr4 | 3548643 | 3550607 | 10 | 1965 | 1.64E-14    |
| Chr4 | 3562243 | 3563725 | 5  | 1483 | 5.5446E-06  |
| Chr4 | 3566085 | 3566531 | 4  | 447  | 0.000139521 |
| Chr4 | 3570943 | 3572007 | 4  | 1065 | 2.22221E-05 |
| Chr4 | 3584421 | 3586508 | 9  | 2088 | 8.70E-13    |
| Chr4 | 3588095 | 3588977 | 4  | 883  | 1.39601E-05 |
| Chr4 | 3593527 | 3595542 | 8  | 2016 | 4.12E-13    |
| Chr4 | 3599311 | 3601412 | 8  | 2102 | 4.89E-12    |
| Chr4 | 3602678 | 3603711 | 4  | 1034 | 1.39E-08    |
| Chr4 | 3616681 | 3620609 | 10 | 3929 | 7.64E-15    |
| Chr4 | 3624232 | 3627736 | 9  | 3505 | 2.46E-08    |
| Chr4 | 3629744 | 3631361 | 5  | 1618 | 1.46043E-06 |
| Chr4 | 3632648 | 3635989 | 12 | 3342 | 9.55E-18    |
| Chr4 | 3638412 | 3640618 | 6  | 2207 | 1.06E-07    |
| Chr4 | 3641745 | 3643792 | 6  | 2048 | 2.52E-08    |
| Chr4 | 3648578 | 3651195 | 6  | 2618 | 2.10E-08    |
| Chr4 | 3661214 | 3661998 | 7  | 785  | 5.34E-08    |
| Chr4 | 3689750 | 3690520 | 4  | 771  | 9.64E-08    |
| Chr4 | 3694354 | 3696007 | 11 | 1654 | 7.54E-14    |
| Chr4 | 3703264 | 3704121 | 6  | 858  | 3.60E-08    |
| Chr4 | 3709150 | 3711354 | 5  | 2205 | 5.06E-08    |
| Chr4 | 3712850 | 3713301 | 5  | 452  | 7.54E-07    |
| Chr4 | 3715919 | 3716447 | 4  | 529  | 2.75E-07    |
| Chr4 | 3737094 | 3742497 | 27 | 5404 | 4.09E-25    |
| Chr4 | 3747144 | 3749265 | 9  | 2122 | 2.39E-09    |
| Chr4 | 3778893 | 3781211 | 5  | 2319 | 4.09E-08    |
| Chr4 | 3790729 | 3793264 | 6  | 2536 | 4.88E-08    |
| Chr4 | 3832451 | 3834525 | 4  | 2075 | 1.9999E-05  |
| Chr4 | 3840472 | 3841049 | 4  | 578  | 1.99003E-05 |
| Chr4 | 3847704 | 3852380 | 13 | 4677 | 6.68E-17    |
| Chr4 | 3865125 | 3866307 | 4  | 1183 | 1.01446E-05 |
| Chr4 | 3871587 | 3872088 | 5  | 502  | 0.000135159 |
| Chr4 | 3873377 | 3873847 | 4  | 471  | 3.80E-07    |
| Chr4 | 3882336 | 3884978 | 9  | 2643 | 7.20E-12    |
| Chr4 | 3906235 | 3908800 | 10 | 2566 | 4.78E-14    |
| Chr4 | 3913197 | 3915626 | 10 | 2430 | 9.29E-16    |
| Chr4 | 3923469 | 3927512 | 10 | 4044 | 7.27E-16    |
| Chr4 | 3929439 | 3931396 | 4  | 1958 | 6.36E-08    |
| Chr4 | 3935915 | 3938759 | 8  | 2845 | 6.66E-13    |
| Chr4 | 3943570 | 3946860 | 5  | 3291 | 5.11E-07    |
| Chr4 | 3949129 | 3955922 | 86 | 6794 | 5.13E-88    |
| Chr4 | 3957097 | 3958489 | 5  | 1393 | 9.51E-07    |
| Chr4 | 3960764 | 3968629 | 36 | 7866 | 7.12E-37    |
| Chr4 | 3977492 | 3979981 | 21 | 2490 | 5.37E-15    |
| Chr4 | 3982343 | 3983571 | 14 | 1229 | 1.78E-11    |
| Chr4 | 3987384 | 3988674 | 8  | 1291 | 1.06E-11    |
| Chr4 | 3992490 | 3996193 | 29 | 3704 | 5.28E-26    |
| Chr4 | 3998149 | 3998361 | 5  | 213  | 0.000137615 |
| Chr4 | 4000106 | 4000821 | 9  | 716  | 4.17E-09    |
| Chr4 | 4003309 | 4004102 | 8  | 794  | 0.018720822 |
| Chr4 | 4007092 | 4007365 | 7  | 274  | 1.94E-12    |
| Chr4 | 4008403 | 4012337 | 28 | 3935 | 1.34E-22    |
| Chr4 | 4015549 | 4018867 | 8  | 3319 | 1.28E-09    |
| Chr4 | 4023142 | 4024373 | 4  | 1232 | 7.14084E-05 |

|      |         |         |    |      |             |
|------|---------|---------|----|------|-------------|
| Chr4 | 4026160 | 4028630 | 8  | 2471 | 3.72E-10    |
| Chr4 | 4036070 | 4037399 | 7  | 1330 | 1.59E-10    |
| Chr4 | 4041581 | 4044364 | 7  | 2784 | 5.21E-08    |
| Chr4 | 4047738 | 4049835 | 9  | 2098 | 1.46E-12    |
| Chr4 | 4053650 | 4054455 | 7  | 806  | 8.82E-11    |
| Chr4 | 4061753 | 4063595 | 6  | 1843 | 7.80E-09    |
| Chr4 | 4064735 | 4065703 | 4  | 969  | 1.02E-07    |
| Chr4 | 4100062 | 4101379 | 4  | 1318 | 5.94371E-05 |
| Chr4 | 4111748 | 4114571 | 8  | 2824 | 2.39E-12    |
| Chr4 | 4124732 | 4126007 | 6  | 1276 | 8.59E-08    |
| Chr4 | 4135623 | 4137690 | 8  | 2068 | 4.66E-13    |
| Chr4 | 4158296 | 4161303 | 10 | 3008 | 1.59E-12    |
| Chr4 | 4174678 | 4175462 | 4  | 785  | 3.20E-07    |
| Chr4 | 4177755 | 4178698 | 5  | 944  | 2.21E-07    |
| Chr4 | 4179928 | 4181276 | 5  | 1349 | 2.70E-07    |
| Chr4 | 4182506 | 4186822 | 16 | 4317 | 2.79E-18    |
| Chr4 | 4212111 | 4213869 | 5  | 1759 | 4.64966E-06 |
| Chr4 | 4236437 | 4239676 | 12 | 3240 | 1.24E-13    |
| Chr4 | 4241749 | 4248076 | 20 | 6328 | 3.50E-21    |
| Chr4 | 4249275 | 4250825 | 4  | 1551 | 4.93618E-06 |
| Chr4 | 4260118 | 4263607 | 9  | 3490 | 5.29E-11    |
| Chr4 | 4276341 | 4282451 | 20 | 6111 | 8.91E-26    |
| Chr4 | 4287107 | 4288515 | 9  | 1409 | 6.18E-13    |
| Chr4 | 4289827 | 4293279 | 8  | 3453 | 4.33E-11    |
| Chr4 | 4294324 | 4298282 | 8  | 3959 | 2.13E-09    |
| Chr4 | 4303917 | 4305534 | 7  | 1618 | 5.46E-08    |
| Chr4 | 4308409 | 4309620 | 5  | 1212 | 1.09E-08    |
| Chr4 | 4321968 | 4322366 | 4  | 399  | 3.14674E-05 |
| Chr4 | 4326803 | 4328161 | 4  | 1359 | 3.45854E-06 |
| Chr4 | 4340056 | 4341315 | 7  | 1260 | 5.68E-14    |
| Chr4 | 4346679 | 4348078 | 5  | 1400 | 6.23E-08    |
| Chr4 | 4350141 | 4354240 | 8  | 4100 | 1.87E-12    |
| Chr4 | 4355432 | 4357494 | 5  | 2063 | 1.35631E-05 |
| Chr4 | 4358830 | 4362012 | 6  | 3183 | 1.33E-07    |
| Chr4 | 4365313 | 4366510 | 4  | 1198 | 9.71662E-07 |
| Chr4 | 4380990 | 4382075 | 5  | 1086 | 8.3252E-05  |
| Chr4 | 4386922 | 4388066 | 5  | 1145 | 2.21E-07    |
| Chr4 | 4389462 | 4390784 | 5  | 1323 | 1.80E-08    |
| Chr4 | 4392037 | 4393477 | 6  | 1441 | 3.06E-08    |
| Chr4 | 4401338 | 4403565 | 6  | 2228 | 1.33E-10    |
| Chr4 | 4406894 | 4407793 | 4  | 900  | 3.08E-08    |
| Chr4 | 4409472 | 4410663 | 7  | 1192 | 1.53E-10    |
| Chr4 | 4414714 | 4416188 | 4  | 1475 | 5.88E-09    |
| Chr4 | 4418333 | 4421697 | 7  | 3365 | 2.43E-11    |
| Chr4 | 4423049 | 4427106 | 14 | 4058 | 5.30E-21    |
| Chr4 | 4429130 | 4429504 | 4  | 375  | 2.5826E-05  |
| Chr4 | 4431233 | 4436002 | 13 | 4770 | 7.23E-17    |
| Chr4 | 4438345 | 4442065 | 11 | 3721 | 4.65E-16    |
| Chr4 | 4450513 | 4452322 | 5  | 1810 | 5.38499E-06 |
| Chr4 | 4454686 | 4455353 | 4  | 668  | 2.82261E-06 |
| Chr4 | 4487112 | 4488076 | 5  | 965  | 2.34E-09    |
| Chr4 | 4505885 | 4507524 | 6  | 1640 | 8.95E-08    |
| Chr4 | 4514969 | 4517625 | 11 | 2657 | 3.33E-12    |
| Chr4 | 4524633 | 4525397 | 4  | 765  | 4.58E-07    |
| Chr4 | 4527279 | 4528220 | 4  | 942  | 8.27E-07    |
| Chr4 | 4543867 | 4545935 | 6  | 2069 | 1.20E-10    |
| Chr4 | 4553198 | 4556252 | 8  | 3055 | 3.14E-10    |
| Chr4 | 4558096 | 4560772 | 7  | 2677 | 1.77672E-08 |
| Chr4 | 4563633 | 4564462 | 7  | 830  | 7.84E-08    |
| Chr4 | 4565914 | 4572238 | 17 | 6325 | 1.94E-24    |
| Chr4 | 4645552 | 4647274 | 5  | 1723 | 5.27E-07    |
| Chr4 | 4710081 | 4712171 | 7  | 2091 | 3.06E-08    |
| Chr4 | 4720499 | 4721263 | 5  | 765  | 7.19E-09    |

|      |         |         |    |      |             |
|------|---------|---------|----|------|-------------|
| Chr4 | 4722914 | 4726441 | 11 | 3528 | 7.95E-11    |
| Chr4 | 4731063 | 4732277 | 6  | 1215 | 3.98E-10    |
| Chr4 | 4735325 | 4735998 | 5  | 674  | 1.10E-09    |
| Chr4 | 4744279 | 4748969 | 11 | 4691 | 2.33E-18    |
| Chr4 | 4750222 | 4751872 | 5  | 1651 | 3.74E-08    |
| Chr4 | 4752886 | 4754067 | 5  | 1182 | 3.70749E-06 |
| Chr4 | 4758711 | 4761585 | 13 | 2875 | 1.39E-19    |
| Chr4 | 4762791 | 4768931 | 17 | 6141 | 2.53E-18    |
| Chr4 | 4770469 | 4772091 | 6  | 1623 | 1.85E-08    |
| Chr4 | 4774708 | 4778578 | 10 | 3871 | 2.16E-13    |
| Chr4 | 4780632 | 4782600 | 11 | 1969 | 3.77E-13    |
| Chr4 | 4785515 | 4787509 | 5  | 1995 | 2.97E-07    |
| Chr4 | 4832069 | 4833649 | 6  | 1581 | 1.79E-08    |
| Chr4 | 4835740 | 4837885 | 5  | 2146 | 4.87E-07    |
| Chr4 | 4852807 | 4854285 | 4  | 1479 | 1.41826E-05 |
| Chr4 | 4856285 | 4858814 | 9  | 2530 | 4.96E-18    |
| Chr4 | 4900567 | 4901346 | 5  | 780  | 3.5524E-06  |
| Chr4 | 4924925 | 4926793 | 7  | 1869 | 1.99E-11    |
| Chr4 | 4932639 | 4935487 | 9  | 2849 | 1.09E-14    |
| Chr4 | 4958580 | 4964495 | 21 | 5916 | 4.34E-25    |
| Chr4 | 4997173 | 4998491 | 4  | 1319 | 3.58289E-06 |
| Chr4 | 5003717 | 5006021 | 6  | 2305 | 8.08E-10    |
| Chr4 | 5014862 | 5018840 | 9  | 3979 | 1.00E-11    |
| Chr4 | 5021850 | 5022868 | 5  | 1019 | 1.74E-08    |
| Chr4 | 5024584 | 5027438 | 9  | 2855 | 4.27E-08    |
| Chr4 | 5042911 | 5049487 | 24 | 6577 | 6.78E-27    |
| Chr4 | 5054070 | 5055289 | 5  | 1220 | 1.02366E-05 |
| Chr4 | 5056941 | 5059091 | 6  | 2151 | 6.42E-07    |
| Chr4 | 5060527 | 5068426 | 24 | 7900 | 2.09E-20    |
| Chr4 | 5069696 | 5071246 | 9  | 1551 | 2.30E-10    |
| Chr4 | 5074223 | 5081206 | 33 | 6984 | 6.46E-39    |
| Chr4 | 5082566 | 5083639 | 8  | 1074 | 9.70E-11    |
| Chr4 | 5091294 | 5092317 | 4  | 1024 | 5.13E-07    |
| Chr4 | 5100627 | 5102024 | 4  | 1398 | 2.07E-07    |
| Chr4 | 5103047 | 5105218 | 9  | 2172 | 1.31E-11    |
| Chr4 | 5129293 | 5132350 | 11 | 3058 | 2.33E-15    |
| Chr4 | 5137289 | 5139439 | 5  | 2151 | 2.51809E-06 |
| Chr4 | 5307176 | 5308700 | 4  | 1525 | 1.6749E-06  |
| Chr4 | 5402703 | 5403039 | 4  | 337  | 8.06E-08    |
| Chr4 | 5489932 | 5490172 | 6  | 241  | 2.32E-09    |
| Chr4 | 5509535 | 5511540 | 6  | 2006 | 7.87E-09    |
| Chr4 | 5521238 | 5523524 | 8  | 2287 | 4.38E-13    |
| Chr4 | 5525255 | 5527596 | 4  | 2342 | 1.28769E-06 |
| Chr4 | 5533945 | 5535328 | 5  | 1384 | 5.37E-08    |
| Chr4 | 5570632 | 5571156 | 4  | 525  | 8.08358E-05 |
| Chr4 | 5638951 | 5639329 | 5  | 379  | 2.06E-14    |
| Chr4 | 5915514 | 5916997 | 4  | 1484 | 1.55379E-05 |
| Chr4 | 5940635 | 5943372 | 6  | 2738 | 1.22E-07    |
| Chr4 | 5968687 | 5970203 | 4  | 1517 | 1.58E-08    |
| Chr4 | 6057992 | 6059073 | 4  | 1082 | 2.25E-08    |
| Chr4 | 6070200 | 6071706 | 6  | 1507 | 5.77E-08    |
| Chr4 | 6126480 | 6128745 | 5  | 2266 | 6.78E-08    |
| Chr4 | 6314947 | 6315823 | 4  | 877  | 7.42E-12    |
| Chr4 | 6467219 | 6468573 | 5  | 1355 | 3.20E-11    |
| Chr4 | 6529676 | 6532217 | 4  | 2542 | 0.000389207 |
| Chr4 | 6536289 | 6536819 | 4  | 531  | 9.81E-09    |
| Chr4 | 6651627 | 6653748 | 4  | 2122 | 2.96E-09    |
| Chr4 | 6723516 | 6724876 | 4  | 1361 | 1.51636E-06 |
| Chr4 | 6915220 | 6918455 | 6  | 3236 | 8.75E-10    |
| Chr4 | 7089631 | 7089807 | 4  | 177  | 1.12789E-07 |
| Chr4 | 7132003 | 7132447 | 4  | 445  | 1.61E-08    |
| Chr4 | 7687935 | 7688381 | 8  | 447  | 5.07E-19    |
| Chr4 | 7784284 | 7785034 | 5  | 751  | 1.15185E-06 |

|      |          |          |    |      |             |
|------|----------|----------|----|------|-------------|
| Chr4 | 8044896  | 8045021  | 4  | 126  | 1.79E-15    |
| Chr4 | 8367389  | 8368422  | 4  | 1034 | 5.18E-09    |
| Chr4 | 8904948  | 8906200  | 5  | 1253 | 8.63E-09    |
| Chr4 | 9022496  | 9022656  | 4  | 161  | 2.49951E-06 |
| Chr4 | 9733152  | 9734415  | 6  | 1264 | 3.39E-11    |
| Chr4 | 9902331  | 9902343  | 4  | 13   | 1.0963E-06  |
| Chr4 | 10053433 | 10054541 | 5  | 1109 | 1.56E-11    |
| Chr4 | 10173087 | 10173720 | 5  | 634  | 3.00E-08    |
| Chr4 | 10544793 | 10545611 | 4  | 819  | 6.42E-08    |
| Chr4 | 10648472 | 10649077 | 5  | 606  | 1.67E-08    |
| Chr4 | 10994804 | 10995932 | 4  | 1129 | 6.67377E-06 |
| Chr4 | 11040989 | 11042270 | 4  | 1282 | 6.54E-09    |
| Chr4 | 11137402 | 11137612 | 4  | 211  | 7.61E-07    |
| Chr4 | 11173387 | 11173887 | 6  | 501  | 1.00E-08    |
| Chr4 | 11208587 | 11209799 | 5  | 1213 | 2.56696E-06 |
| Chr4 | 11347897 | 11349545 | 7  | 1649 | 3.2021E-07  |
| Chr4 | 11657497 | 11657830 | 7  | 334  | 1.27E-17    |
| Chr4 | 11822433 | 11824777 | 8  | 2345 | 1.17E-11    |
| Chr4 | 12368111 | 12369093 | 4  | 983  | 2.04387E-06 |
| Chr4 | 12570156 | 12571370 | 4  | 1215 | 0.000483324 |
| Chr4 | 13328284 | 13329548 | 4  | 1265 | 5.1559E-05  |
| Chr4 | 13627248 | 13629436 | 10 | 2189 | 2.60E-16    |
| Chr4 | 13630514 | 13630742 | 5  | 229  | 1.02E-07    |
| Chr4 | 14146220 | 14147007 | 13 | 788  | 4.43E-13    |
| Chr4 | 14282360 | 14283038 | 4  | 679  | 1.95621E-05 |
| Chr4 | 14682487 | 14683398 | 4  | 912  | 7.87828E-06 |
| Chr4 | 15391053 | 15392000 | 5  | 948  | 6.58E-12    |
| Chr4 | 16111535 | 16111746 | 8  | 212  | 4.74E-17    |
| Chr4 | 16325609 | 16325973 | 4  | 365  | 3.42E-08    |
| Chr4 | 16374536 | 16375298 | 5  | 763  | 2.68E-11    |
| Chr4 | 16442224 | 16442389 | 4  | 166  | 6.5484E-06  |
| Chr4 | 18026164 | 18027126 | 10 | 963  | 4.69E-16    |
| Chr5 | 64895    | 66433    | 11 | 1539 | 1.49E-12    |
| Chr5 | 68603    | 69591    | 7  | 989  | 1.44E-09    |
| Chr5 | 2393392  | 2394755  | 7  | 1364 | 2.30072E-06 |
| Chr5 | 2401733  | 2402463  | 7  | 731  | 1.90E-11    |
| Chr5 | 3249104  | 3249875  | 13 | 772  | 6.64E-19    |
| Chr5 | 3253146  | 3253246  | 5  | 101  | 1.53E-20    |
| Chr5 | 4988071  | 4988565  | 4  | 495  | 0.000111793 |
| Chr5 | 5391290  | 5391749  | 4  | 460  | 4.68471E-06 |
| Chr5 | 5644859  | 5646630  | 5  | 1772 | 6.88E-08    |
| Chr5 | 5855579  | 5856518  | 4  | 940  | 6.43659E-06 |
| Chr5 | 6210981  | 6212229  | 6  | 1249 | 2.5422E-06  |
| Chr5 | 6632791  | 6633391  | 4  | 601  | 2.42858E-06 |
| Chr5 | 6897604  | 6897753  | 4  | 150  | 6.14E-08    |
| Chr5 | 7027902  | 7028400  | 4  | 499  | 9.58E-08    |
| Chr5 | 7030274  | 7031962  | 5  | 1689 | 7.97E-07    |
| Chr5 | 7236340  | 7236857  | 4  | 518  | 9.50203E-05 |
| Chr5 | 7378007  | 7378181  | 4  | 175  | 4.7759E-07  |
| Chr5 | 8549731  | 8550473  | 4  | 743  | 8.65E-07    |
| Chr5 | 8572382  | 8574574  | 12 | 2193 | 1.49E-14    |
| Chr5 | 8718504  | 8720874  | 6  | 2371 | 1.7194E-05  |
| Chr5 | 8930733  | 8931943  | 4  | 1211 | 9.8385E-06  |
| Chr5 | 8952476  | 8952615  | 4  | 140  | 5.01042E-05 |
| Chr5 | 9186222  | 9188883  | 6  | 2662 | 6.76E-08    |
| Chr5 | 9273782  | 9275003  | 5  | 1222 | 1.49E-08    |
| Chr5 | 9414877  | 9416372  | 4  | 1496 | 1.18436E-05 |
| Chr5 | 9755905  | 9756904  | 6  | 1000 | 3.97E-09    |
| Chr5 | 9829106  | 9829764  | 4  | 659  | 1.15648E-05 |
| Chr5 | 9891346  | 9892447  | 4  | 1102 | 1.42296E-06 |
| Chr5 | 9904656  | 9906604  | 5  | 1949 | 2.0955E-06  |
| Chr5 | 9926264  | 9929112  | 10 | 2849 | 8.50E-14    |
| Chr5 | 9949570  | 9954897  | 13 | 5328 | 3.16E-17    |

|      |          |          |     |      |             |
|------|----------|----------|-----|------|-------------|
| Chr5 | 9980861  | 9982086  | 4   | 1226 | 6.72E-09    |
| Chr5 | 9996002  | 9998926  | 7   | 2925 | 3.68E-11    |
| Chr5 | 10095327 | 10098111 | 8   | 2785 | 5.80E-11    |
| Chr5 | 10105235 | 10105818 | 4   | 584  | 0.000157007 |
| Chr5 | 10126846 | 10127150 | 4   | 305  | 2.693E-05   |
| Chr5 | 10140833 | 10141348 | 4   | 516  | 7.54E-08    |
| Chr5 | 10199932 | 10203981 | 8   | 4050 | 8.91E-11    |
| Chr5 | 10256038 | 10257849 | 7   | 1812 | 1.93E-09    |
| Chr5 | 10351608 | 10354237 | 7   | 2630 | 5.13E-08    |
| Chr5 | 10355254 | 10356317 | 4   | 1064 | 9.63055E-06 |
| Chr5 | 10360199 | 10361421 | 5   | 1223 | 7.95E-09    |
| Chr5 | 10372695 | 10374119 | 4   | 1425 | 1.7484E-05  |
| Chr5 | 10410970 | 10411158 | 4   | 189  | 4.02E-07    |
| Chr5 | 10413571 | 10414238 | 4   | 668  | 0.000118311 |
| Chr5 | 10514190 | 10515605 | 5   | 1416 | 8.33826E-06 |
| Chr5 | 10548011 | 10551067 | 7   | 3057 | 8.67E-11    |
| Chr5 | 10552954 | 10554149 | 5   | 1196 | 4.28E-09    |
| Chr5 | 10578837 | 10580009 | 4   | 1173 | 5.26E-07    |
| Chr5 | 10587938 | 10590486 | 7   | 2549 | 3.73E-09    |
| Chr5 | 10592366 | 10595822 | 8   | 3457 | 6.51E-10    |
| Chr5 | 10623061 | 10624407 | 4   | 1347 | 7.29033E-05 |
| Chr5 | 10634663 | 10635295 | 5   | 633  | 3.87E-10    |
| Chr5 | 10685373 | 10686504 | 4   | 1132 | 1.97385E-06 |
| Chr5 | 10738661 | 10739583 | 4   | 923  | 1.52793E-05 |
| Chr5 | 10742540 | 10746299 | 11  | 3760 | 1.22E-15    |
| Chr5 | 10765410 | 10769466 | 14  | 4057 | 3.88E-20    |
| Chr5 | 10778309 | 10779533 | 4   | 1225 | 0.000251707 |
| Chr5 | 10789921 | 10791862 | 4   | 1942 | 0.000240982 |
| Chr5 | 10795127 | 10795469 | 4   | 343  | 1.58E-07    |
| Chr5 | 10846736 | 10848325 | 4   | 1590 | 1.82782E-07 |
| Chr5 | 10889645 | 10891381 | 5   | 1737 | 8.51476E-06 |
| Chr5 | 10902934 | 10904533 | 5   | 1600 | 1.82E-07    |
| Chr5 | 11050255 | 11052025 | 5   | 1771 | 0.000751352 |
| Chr5 | 11056490 | 11058583 | 6   | 2094 | 8.84E-09    |
| Chr5 | 11067781 | 11068312 | 4   | 532  | 0.000170705 |
| Chr5 | 11101698 | 11104605 | 5   | 2908 | 1.21E-07    |
| Chr5 | 11122246 | 11123419 | 6   | 1174 | 7.89E-09    |
| Chr5 | 11141639 | 11142296 | 4   | 658  | 2.85E-08    |
| Chr5 | 11145146 | 11146649 | 4   | 1504 | 8.98468E-06 |
| Chr5 | 11161242 | 11162145 | 5   | 904  | 9.00E-07    |
| Chr5 | 11167087 | 11168205 | 4   | 1119 | 4.80E-08    |
| Chr5 | 11180040 | 11181340 | 8   | 1301 | 5.96E-09    |
| Chr5 | 11184744 | 11188843 | 289 | 4100 | 0           |
| Chr5 | 11206710 | 11208044 | 8   | 1335 | 1.47E-10    |
| Chr5 | 11214769 | 11215535 | 6   | 767  | 1.34893E-06 |
| Chr5 | 11219440 | 11220614 | 5   | 1175 | 1.34E-09    |
| Chr5 | 11298987 | 11300120 | 4   | 1134 | 1.08632E-05 |
| Chr5 | 11318988 | 11321449 | 7   | 2462 | 3.75E-08    |
| Chr5 | 11324088 | 11324609 | 6   | 522  | 3.21E-07    |
| Chr5 | 11335784 | 11340568 | 12  | 4785 | 8.21E-16    |
| Chr5 | 11349469 | 11350951 | 6   | 1483 | 1.18E-07    |
| Chr5 | 11352005 | 11353131 | 5   | 1127 | 1.53E-07    |
| Chr5 | 11356468 | 11359341 | 10  | 2874 | 6.05E-13    |
| Chr5 | 11363476 | 11366914 | 10  | 3439 | 9.06E-16    |
| Chr5 | 11396671 | 11404413 | 21  | 7743 | 1.32E-21    |
| Chr5 | 11407828 | 11409173 | 4   | 1346 | 0.000270868 |
| Chr5 | 11411117 | 11412187 | 4   | 1071 | 8.1147E-05  |
| Chr5 | 11430314 | 11431245 | 4   | 932  | 5.03152E-06 |
| Chr5 | 11435723 | 11438198 | 8   | 2476 | 3.40E-14    |
| Chr5 | 11454528 | 11455935 | 5   | 1408 | 1.0224E-06  |
| Chr5 | 11466800 | 11469072 | 6   | 2273 | 8.40E-09    |
| Chr5 | 11475464 | 11477250 | 10  | 1787 | 1.01E-14    |
| Chr5 | 11478653 | 11479413 | 4   | 761  | 6.82047E-05 |

|      |          |          |     |       |             |
|------|----------|----------|-----|-------|-------------|
| Chr5 | 11499390 | 11500558 | 5   | 1169  | 6.89E-07    |
| Chr5 | 11520078 | 11521727 | 5   | 1650  | 5.54E-08    |
| Chr5 | 11568560 | 11569236 | 4   | 677   | 2.50E-08    |
| Chr5 | 11573182 | 11573708 | 4   | 527   | 7.8084E-06  |
| Chr5 | 11578029 | 11579968 | 6   | 1940  | 8.17E-08    |
| Chr5 | 11582266 | 11583631 | 4   | 1366  | 2.35431E-06 |
| Chr5 | 11584908 | 11587110 | 7   | 2203  | 9.48E-09    |
| Chr5 | 11593029 | 11593297 | 4   | 269   | 6.67E-08    |
| Chr5 | 11624423 | 11624749 | 4   | 327   | 5.84E-07    |
| Chr5 | 11630506 | 11632198 | 5   | 1693  | 1.67409E-06 |
| Chr5 | 11642687 | 11644675 | 4   | 1989  | 1.28917E-05 |
| Chr5 | 11650324 | 11652579 | 6   | 2256  | 4.35807E-06 |
| Chr5 | 11687927 | 11688209 | 4   | 283   | 2.54E-07    |
| Chr5 | 11692891 | 11693781 | 4   | 891   | 0.000554744 |
| Chr5 | 11697749 | 11699201 | 5   | 1453  | 8.54E-07    |
| Chr5 | 11700504 | 11705352 | 46  | 4849  | 9.04E-35    |
| Chr5 | 11707038 | 11711067 | 16  | 4030  | 1.48E-12    |
| Chr5 | 11723350 | 11725006 | 14  | 1657  | 1.33E-15    |
| Chr5 | 11726094 | 11729764 | 44  | 3671  | 4.52E-120   |
| Chr5 | 11730770 | 11735114 | 24  | 4345  | 2.09E-31    |
| Chr5 | 11737277 | 11739332 | 8   | 2056  | 1.06E-08    |
| Chr5 | 11742649 | 11744458 | 8   | 1810  | 3.39E-13    |
| Chr5 | 11751241 | 11752878 | 10  | 1638  | 9.27E-14    |
| Chr5 | 11754476 | 11755546 | 6   | 1071  | 0.000141691 |
| Chr5 | 11757038 | 11757770 | 4   | 733   | 7.58E-08    |
| Chr5 | 11765754 | 11766176 | 5   | 423   | 3.61E-08    |
| Chr5 | 11767982 | 11768492 | 4   | 511   | 1.63075E-06 |
| Chr5 | 11771745 | 11773019 | 5   | 1275  | 6.91181E-06 |
| Chr5 | 11776581 | 11778901 | 12  | 2321  | 2.14E-19    |
| Chr5 | 11782543 | 11784749 | 12  | 2207  | 7.35E-18    |
| Chr5 | 11787922 | 11789429 | 7   | 1508  | 5.65E-08    |
| Chr5 | 11799039 | 11807426 | 20  | 8388  | 1.81E-18    |
| Chr5 | 11821953 | 11825732 | 9   | 3780  | 1.80E-11    |
| Chr5 | 11833139 | 11835056 | 11  | 1918  | 9.70E-13    |
| Chr5 | 11842588 | 11845483 | 8   | 2896  | 3.26E-08    |
| Chr5 | 11850506 | 11852886 | 5   | 2381  | 3.57E-07    |
| Chr5 | 11868763 | 11869675 | 4   | 913   | 0.00021503  |
| Chr5 | 11897382 | 11899393 | 8   | 2012  | 8.96E-12    |
| Chr5 | 11903854 | 11904626 | 4   | 773   | 2.72E-07    |
| Chr5 | 11906488 | 11908725 | 4   | 2238  | 5.30865E-05 |
| Chr5 | 11911311 | 11914325 | 11  | 3015  | 3.85E-18    |
| Chr5 | 11915730 | 11917173 | 4   | 1444  | 1.71906E-06 |
| Chr5 | 11918185 | 11919261 | 4   | 1077  | 2.69069E-06 |
| Chr5 | 11935192 | 11943120 | 101 | 7929  | 1.16E-93    |
| Chr5 | 11944290 | 11945683 | 9   | 1394  | 6.12E-12    |
| Chr5 | 11952258 | 11955025 | 8   | 2768  | 5.92E-10    |
| Chr5 | 11971056 | 11971871 | 4   | 816   | 5.64E-07    |
| Chr5 | 11972915 | 11973125 | 4   | 211   | 1.03925E-05 |
| Chr5 | 11974798 | 11976997 | 9   | 2200  | 1.38E-11    |
| Chr5 | 11979755 | 11995032 | 77  | 15278 | 8.01E-67    |
| Chr5 | 11997692 | 11998163 | 7   | 472   | 4.50E-08    |
| Chr5 | 11999473 | 12001309 | 4   | 1837  | 2.39688E-05 |
| Chr5 | 12002464 | 12003787 | 5   | 1324  | 2.20056E-07 |
| Chr5 | 12007525 | 12008835 | 4   | 1311  | 1.89416E-06 |
| Chr5 | 12009852 | 12015198 | 20  | 5347  | 4.85E-20    |
| Chr5 | 12018060 | 12020470 | 10  | 2411  | 4.30E-16    |
| Chr5 | 12021926 | 12025405 | 18  | 3480  | 1.48E-26    |
| Chr5 | 12027766 | 12029606 | 5   | 1841  | 5.42992E-06 |
| Chr5 | 12030655 | 12031617 | 5   | 963   | 2.27277E-06 |
| Chr5 | 12034527 | 12043190 | 26  | 8664  | 3.68E-26    |
| Chr5 | 12044672 | 12045748 | 7   | 1077  | 2.36E-09    |
| Chr5 | 12052454 | 12055408 | 9   | 2955  | 3.09E-08    |
| Chr5 | 12056963 | 12059723 | 9   | 2761  | 5.17E-14    |



|      |          |          |    |      |             |
|------|----------|----------|----|------|-------------|
| Chr5 | 12061878 | 12062947 | 6  | 1070 | 1.01E-07    |
| Chr5 | 12063948 | 12065509 | 5  | 1562 | 0.000468256 |
| Chr5 | 12069629 | 12076439 | 15 | 6811 | 1.60E-15    |
| Chr5 | 12103724 | 12104567 | 6  | 844  | 3.98E-10    |
| Chr5 | 12105989 | 12112753 | 23 | 6765 | 9.63E-27    |
| Chr5 | 12124261 | 12125470 | 8  | 1210 | 1.14E-11    |
| Chr5 | 12127294 | 12127609 | 4  | 316  | 1.21814E-06 |
| Chr5 | 12137083 | 12139308 | 10 | 2226 | 7.86E-11    |
| Chr5 | 12140496 | 12142934 | 9  | 2439 | 5.13E-10    |
| Chr5 | 12145638 | 12150092 | 16 | 4455 | 9.01E-19    |
| Chr5 | 12154263 | 12157330 | 10 | 3068 | 2.61E-11    |
| Chr5 | 12159327 | 12159661 | 4  | 335  | 0.000162582 |
| Chr5 | 12161518 | 12163954 | 9  | 2437 | 3.24E-08    |
| Chr5 | 12165539 | 12170076 | 16 | 4538 | 3.18E-17    |
| Chr5 | 12175167 | 12180477 | 18 | 5311 | 6.58E-23    |
| Chr5 | 12199412 | 12201860 | 4  | 2449 | 4.18128E-06 |
| Chr5 | 12210929 | 12212089 | 5  | 1161 | 2.61052E-06 |
| Chr5 | 12213525 | 12213905 | 4  | 381  | 1.37715E-05 |
| Chr5 | 12214928 | 12219342 | 9  | 4415 | 3.32E-11    |
| Chr5 | 12221366 | 12226868 | 17 | 5503 | 2.51E-27    |
| Chr5 | 12228410 | 12235570 | 24 | 7161 | 3.45E-28    |
| Chr5 | 12237542 | 12239258 | 7  | 1717 | 6.58E-11    |
| Chr5 | 12245716 | 12246698 | 4  | 983  | 3.62375E-06 |
| Chr5 | 12255628 | 12256848 | 6  | 1221 | 2.53E-09    |
| Chr5 | 12265284 | 12266838 | 4  | 1555 | 2.54E-09    |
| Chr5 | 12270422 | 12272077 | 5  | 1656 | 2.55E-07    |
| Chr5 | 12284998 | 12287349 | 8  | 2352 | 6.31E-17    |
| Chr5 | 12296766 | 12300516 | 9  | 3751 | 7.65E-15    |
| Chr5 | 12311790 | 12316142 | 12 | 4353 | 1.99E-12    |
| Chr5 | 12320245 | 12322696 | 7  | 2452 | 4.20E-09    |
| Chr5 | 12327012 | 12328130 | 8  | 1119 | 1.24E-09    |
| Chr5 | 12329193 | 12330149 | 7  | 957  | 7.74E-10    |
| Chr5 | 12333415 | 12335226 | 4  | 1812 | 3.52E-07    |
| Chr5 | 12342321 | 12349089 | 17 | 6769 | 2.56E-23    |
| Chr5 | 12353013 | 12353156 | 4  | 144  | 5.64E-08    |
| Chr5 | 12357881 | 12358628 | 4  | 748  | 3.2887E-06  |
| Chr5 | 12360568 | 12363717 | 9  | 3150 | 3.75E-08    |
| Chr5 | 12368658 | 12374065 | 14 | 5408 | 4.59E-14    |
| Chr5 | 12380018 | 12381500 | 4  | 1483 | 9.38E-08    |
| Chr5 | 12382691 | 12383972 | 5  | 1282 | 3.29309E-07 |
| Chr5 | 12387199 | 12390669 | 8  | 3471 | 1.93E-07    |
| Chr5 | 12396836 | 12400255 | 9  | 3420 | 9.56E-12    |
| Chr5 | 12403526 | 12404409 | 5  | 884  | 8.00E-08    |
| Chr5 | 12407210 | 12407807 | 4  | 598  | 4.79418E-05 |
| Chr5 | 12409163 | 12411603 | 9  | 2441 | 6.94E-09    |
| Chr5 | 12412875 | 12414637 | 5  | 1763 | 4.43E-07    |
| Chr5 | 12428555 | 12431594 | 10 | 3040 | 4.55E-11    |
| Chr5 | 12469264 | 12470426 | 4  | 1163 | 2.79635E-05 |
| Chr5 | 12471706 | 12472666 | 4  | 961  | 5.12573E-06 |
| Chr5 | 12473669 | 12476909 | 14 | 3241 | 2.09E-15    |
| Chr5 | 12479548 | 12481130 | 5  | 1583 | 5.66711E-05 |
| Chr5 | 12488818 | 12489702 | 5  | 885  | 9.50E-07    |
| Chr5 | 12500618 | 12504835 | 17 | 4218 | 3.74E-18    |
| Chr5 | 12512847 | 12513449 | 4  | 603  | 3.70395E-06 |
| Chr5 | 12518354 | 12518835 | 4  | 482  | 7.42604E-06 |
| Chr5 | 12520167 | 12523079 | 10 | 2913 | 7.43E-11    |
| Chr5 | 12524406 | 12526007 | 4  | 1602 | 5.70179E-05 |
| Chr5 | 12530340 | 12536279 | 21 | 5940 | 8.64E-25    |
| Chr5 | 12566796 | 12566807 | 4  | 12   | 6.32E-07    |
| Chr5 | 12573230 | 12575380 | 6  | 2151 | 5.89E-10    |
| Chr5 | 12579521 | 12580445 | 5  | 925  | 7.13E-07    |
| Chr5 | 12610391 | 12613067 | 8  | 2677 | 1.46E-14    |
| Chr5 | 12614081 | 12615701 | 6  | 1621 | 2.64444E-06 |

|      |          |          |    |      |             |
|------|----------|----------|----|------|-------------|
| Chr5 | 12621748 | 12622658 | 4  | 911  | 9.41E-07    |
| Chr5 | 12623741 | 12625651 | 5  | 1911 | 4.19E-07    |
| Chr5 | 12633044 | 12633506 | 4  | 463  | 5.45014E-06 |
| Chr5 | 12635123 | 12636929 | 7  | 1807 | 1.21887E-06 |
| Chr5 | 12641731 | 12643765 | 6  | 2035 | 1.65E-08    |
| Chr5 | 12645923 | 12646770 | 4  | 848  | 1.00E-06    |
| Chr5 | 12649867 | 12650806 | 6  | 940  | 9.90E-07    |
| Chr5 | 12711006 | 12712588 | 8  | 1583 | 2.91E-10    |
| Chr5 | 12713864 | 12714043 | 4  | 180  | 1.19264E-06 |
| Chr5 | 12715279 | 12717117 | 8  | 1839 | 4.05E-10    |
| Chr5 | 12740617 | 12741648 | 5  | 1032 | 1.76E-08    |
| Chr5 | 12746349 | 12748263 | 5  | 1915 | 5.15E-07    |
| Chr5 | 12755774 | 12758165 | 8  | 2392 | 8.50E-11    |
| Chr5 | 12759287 | 12760086 | 5  | 800  | 1.81405E-06 |
| Chr5 | 12770229 | 12770914 | 4  | 686  | 0.000213362 |
| Chr5 | 12774195 | 12775054 | 5  | 860  | 5.29E-07    |
| Chr5 | 12785843 | 12789903 | 9  | 4061 | 1.81E-13    |
| Chr5 | 12792982 | 12795160 | 8  | 2179 | 3.85E-11    |
| Chr5 | 12809414 | 12809444 | 5  | 31   | 1.80543E-05 |
| Chr5 | 12810864 | 12811099 | 8  | 236  | 2.28E-07    |
| Chr5 | 12924373 | 12925888 | 8  | 1516 | 9.48E-08    |
| Chr5 | 12927911 | 12928875 | 4  | 965  | 5.02075E-06 |
| Chr5 | 12936116 | 12937321 | 4  | 1206 | 2.80427E-06 |
| Chr5 | 12940931 | 12943384 | 8  | 2454 | 2.17E-11    |
| Chr5 | 12945984 | 12947198 | 5  | 1215 | 1.93E-08    |
| Chr5 | 12948597 | 12950009 | 4  | 1413 | 9.06E-07    |
| Chr5 | 12953355 | 12954658 | 4  | 1304 | 2.0677E-06  |
| Chr5 | 12956804 | 12957896 | 5  | 1093 | 1.06E-11    |
| Chr5 | 12967254 | 12970789 | 12 | 3536 | 3.44E-13    |
| Chr5 | 12972549 | 12974491 | 11 | 1943 | 2.51E-14    |
| Chr5 | 12983492 | 12985173 | 5  | 1682 | 9.69224E-05 |
| Chr5 | 12997614 | 13000977 | 16 | 3364 | 3.30E-20    |
| Chr5 | 13011625 | 13012687 | 4  | 1063 | 5.50417E-07 |
| Chr5 | 13021007 | 13024918 | 13 | 3912 | 2.51E-17    |
| Chr5 | 13028666 | 13029102 | 5  | 437  | 2.51E-07    |
| Chr5 | 13035121 | 13037924 | 9  | 2804 | 1.95E-11    |
| Chr5 | 13039771 | 13043253 | 7  | 3483 | 5.58E-09    |
| Chr5 | 13073054 | 13074511 | 6  | 1458 | 3.69E-08    |
| Chr5 | 13115220 | 13117071 | 4  | 1852 | 2.18E-07    |
| Chr5 | 13118611 | 13118886 | 4  | 276  | 0.00017288  |
| Chr5 | 13120512 | 13120611 | 4  | 100  | 3.92625E-06 |
| Chr5 | 13123581 | 13125127 | 4  | 1547 | 8.79111E-06 |
| Chr5 | 13142097 | 13143387 | 4  | 1291 | 3.23E-07    |
| Chr5 | 13145136 | 13146456 | 7  | 1321 | 5.24E-12    |
| Chr5 | 13148937 | 13150928 | 4  | 1992 | 9.68E-08    |
| Chr5 | 13160318 | 13161880 | 5  | 1563 | 8.52E-07    |
| Chr5 | 13170235 | 13175774 | 18 | 5540 | 9.38E-23    |
| Chr5 | 13188330 | 13188946 | 4  | 617  | 1.45455E-06 |
| Chr5 | 13262456 | 13264611 | 5  | 2156 | 4.23E-08    |
| Chr5 | 13285520 | 13287372 | 6  | 1853 | 5.80E-07    |
| Chr5 | 13290097 | 13292559 | 5  | 2463 | 7.34E-07    |
| Chr5 | 13295304 | 13297776 | 9  | 2473 | 3.40E-10    |
| Chr5 | 13300803 | 13302017 | 5  | 1215 | 1.45E-09    |
| Chr5 | 13303394 | 13304959 | 6  | 1566 | 3.38E-09    |
| Chr5 | 13316440 | 13319609 | 7  | 3170 | 7.27E-11    |
| Chr5 | 13320801 | 13321207 | 5  | 407  | 6.31E-08    |
| Chr5 | 13324067 | 13326845 | 11 | 2779 | 5.33E-20    |
| Chr5 | 13334060 | 13335239 | 9  | 1180 | 2.13E-13    |
| Chr5 | 13338682 | 13339874 | 6  | 1193 | 7.13E-09    |
| Chr5 | 13373637 | 13378196 | 11 | 4560 | 1.29E-11    |
| Chr5 | 13379209 | 13382536 | 11 | 3328 | 2.29E-16    |
| Chr5 | 13394587 | 13396743 | 6  | 2157 | 4.41E-10    |
| Chr5 | 13397947 | 13400883 | 8  | 2937 | 5.40E-13    |

|      |          |          |    |      |             |
|------|----------|----------|----|------|-------------|
| Chr5 | 13403527 | 13404481 | 4  | 955  | 1.43287E-06 |
| Chr5 | 13405517 | 13406584 | 9  | 1068 | 4.05E-10    |
| Chr5 | 13409847 | 13412337 | 13 | 2491 | 3.98E-17    |
| Chr5 | 13536022 | 13540126 | 10 | 4105 | 3.05E-10    |
| Chr5 | 13782204 | 13783067 | 4  | 864  | 1.89333E-05 |
| Chr5 | 13790118 | 13791829 | 4  | 1712 | 2.6765E-06  |
| Chr5 | 13794090 | 13795289 | 4  | 1200 | 1.86282E-05 |
| Chr5 | 13822641 | 13823755 | 4  | 1115 | 9.23141E-06 |
| Chr5 | 13851774 | 13851822 | 6  | 49   | 2.05E-09    |
| Chr5 | 13926427 | 13929666 | 7  | 3240 | 5.81E-09    |
| Chr5 | 13961352 | 13962979 | 4  | 1628 | 1.85345E-05 |
| Chr5 | 13965212 | 13967421 | 8  | 2210 | 1.18E-10    |
| Chr5 | 13997504 | 13999246 | 10 | 1743 | 7.15E-15    |
| Chr5 | 14085952 | 14087772 | 6  | 1821 | 7.04E-08    |
| Chr5 | 14204573 | 14205245 | 4  | 673  | 6.87238E-06 |
| Chr5 | 14380695 | 14382968 | 10 | 2274 | 1.31E-14    |
| Chr5 | 14610784 | 14611192 | 4  | 409  | 1.0863E-05  |
| Chr5 | 14678662 | 14680936 | 6  | 2275 | 4.24E-09    |
| Chr5 | 14962302 | 14962871 | 5  | 570  | 1.28E-08    |
| Chr5 | 15235763 | 15236688 | 4  | 926  | 1.76E-08    |
| Chr5 | 15337315 | 15337719 | 5  | 405  | 3.21009E-06 |
| Chr5 | 15339106 | 15339691 | 4  | 586  | 1.79E-08    |
| Chr5 | 15385833 | 15386805 | 9  | 973  | 5.32E-12    |
| Chr5 | 15498110 | 15498242 | 4  | 133  | 1.70899E-06 |
| Chr5 | 15647729 | 15648787 | 5  | 1059 | 1.06545E-06 |
| Chr5 | 16262007 | 16262447 | 4  | 441  | 2.16519E-05 |
| Chr5 | 16470318 | 16471618 | 4  | 1301 | 3.29E-07    |
| Chr5 | 17094036 | 17095163 | 5  | 1128 | 2.52443E-06 |
| Chr5 | 17252267 | 17254218 | 4  | 1952 | 3.0791E-06  |
| Chr5 | 17707407 | 17708241 | 5  | 835  | 8.69E-09    |
| Chr5 | 18015989 | 18016382 | 4  | 394  | 8.17739E-06 |
| Chr5 | 18193958 | 18196111 | 6  | 2154 | 4.15E-07    |
| Chr5 | 18427561 | 18428692 | 4  | 1132 | 2.05288E-06 |
| Chr5 | 18477091 | 18477847 | 6  | 757  | 7.38E-07    |
| Chr5 | 18545316 | 18546100 | 4  | 785  | 5.52739E-06 |
| Chr5 | 19313953 | 19314254 | 4  | 302  | 6.57441E-06 |
| Chr5 | 19360177 | 19362114 | 4  | 1938 | 0.000469681 |
| Chr5 | 20034619 | 20034663 | 4  | 45   | 2.27919E-06 |
| Chr5 | 21161913 | 21162768 | 4  | 856  | 7.82711E-06 |
| Chr5 | 21166433 | 21167161 | 4  | 729  | 2.36908E-06 |
| Chr5 | 21922854 | 21923003 | 4  | 150  | 3.89E-07    |
| Chr5 | 22004054 | 22005916 | 4  | 1863 | 2.16542E-05 |
| Chr5 | 22262709 | 22262887 | 4  | 179  | 1.88101E-06 |
| Chr5 | 22616122 | 22618012 | 5  | 1891 | 2.86E-08    |
| Chr5 | 22640527 | 22640841 | 4  | 315  | 8.63E-07    |
| Chr5 | 23025228 | 23026341 | 6  | 1114 | 2.46E-09    |
| Chr5 | 23240795 | 23241308 | 4  | 514  | 8.8831E-06  |
| Chr5 | 23914404 | 23915147 | 4  | 744  | 1.35695E-06 |
| Chr5 | 23987006 | 23987165 | 5  | 160  | 3.74E-10    |
| Chr5 | 24453946 | 24454566 | 4  | 621  | 1.60E-11    |
| Chr5 | 25957491 | 25958221 | 6  | 731  | 4.04E-17    |

**-Pit Root 16 dat (Hyper-DMRs)**

| Chromosome | Start   | End     | number of DMCs | DMR lenght | P-value  |
|------------|---------|---------|----------------|------------|----------|
| Chr1       | 238792  | 239290  | 4              | 499        | 5.67E-07 |
| Chr1       | 1430333 | 1430886 | 7              | 554        | 2.71E-11 |
| Chr1       | 1613561 | 1614545 | 4              | 985        | 9.19E-08 |
| Chr1       | 1956070 | 1957540 | 4              | 1471       | 2.74E-07 |
| Chr1       | 4093264 | 4093435 | 5              | 172        | 1.47E-09 |
| Chr1       | 4329989 | 4330346 | 5              | 358        | 5.62E-08 |
| Chr1       | 4331680 | 4334412 | 11             | 2733       | 1.40E-13 |
| Chr1       | 4682909 | 4684386 | 4              | 1478       | 1.19E-07 |

|      |          |          |     |       |             |
|------|----------|----------|-----|-------|-------------|
| Chr1 | 5099169  | 5099593  | 4   | 425   | 2.88E-08    |
| Chr1 | 5693082  | 5694742  | 7   | 1661  | 1.23E-08    |
| Chr1 | 5915156  | 5916324  | 7   | 1169  | 1.38029E-06 |
| Chr1 | 6009775  | 6010296  | 4   | 522   | 8.86307E-05 |
| Chr1 | 6011922  | 6012881  | 5   | 960   | 2.70E-07    |
| Chr1 | 6274780  | 6276410  | 5   | 1631  | 7.63496E-06 |
| Chr1 | 7066276  | 7070951  | 13  | 4676  | 2.53E-13    |
| Chr1 | 7246413  | 7246596  | 4   | 184   | 1.35706E-06 |
| Chr1 | 7352971  | 7365148  | 111 | 12178 | 5.17E-116   |
| Chr1 | 7717592  | 7718037  | 4   | 446   | 9.00E-07    |
| Chr1 | 7969605  | 7970909  | 5   | 1305  | 4.92395E-06 |
| Chr1 | 7972152  | 7973402  | 8   | 1251  | 4.18E-08    |
| Chr1 | 7985244  | 7986420  | 4   | 1177  | 7.88E-07    |
| Chr1 | 8453552  | 8457085  | 10  | 3534  | 7.28E-10    |
| Chr1 | 8728696  | 8728976  | 4   | 281   | 3.98386E-06 |
| Chr1 | 8732188  | 8733509  | 5   | 1322  | 2.22299E-06 |
| Chr1 | 8928107  | 8929336  | 7   | 1230  | 6.10E-09    |
| Chr1 | 8930484  | 8932657  | 15  | 2174  | 4.82E-19    |
| Chr1 | 9174546  | 9176291  | 6   | 1746  | 7.45E-07    |
| Chr1 | 9368701  | 9370605  | 5   | 1905  | 6.32E-07    |
| Chr1 | 9574332  | 9576863  | 5   | 2532  | 1.24E-08    |
| Chr1 | 9579809  | 9580488  | 4   | 680   | 3.56E-07    |
| Chr1 | 9678078  | 9679469  | 7   | 1392  | 2.01E-11    |
| Chr1 | 9681043  | 9682632  | 4   | 1590  | 1.02511E-06 |
| Chr1 | 9683831  | 9685473  | 7   | 1643  | 2.47E-08    |
| Chr1 | 9686869  | 9688245  | 7   | 1377  | 4.72E-10    |
| Chr1 | 10153655 | 10154544 | 6   | 890   | 3.17E-08    |
| Chr1 | 10357623 | 10360112 | 8   | 2490  | 7.49E-11    |
| Chr1 | 10362094 | 10362725 | 5   | 632   | 1.32E-08    |
| Chr1 | 10533540 | 10534474 | 5   | 935   | 1.80E-07    |
| Chr1 | 10697059 | 10700810 | 17  | 3752  | 9.07E-21    |
| Chr1 | 10965121 | 10965958 | 4   | 838   | 0.000290119 |
| Chr1 | 11304834 | 11306396 | 7   | 1563  | 8.33E-09    |
| Chr1 | 11308298 | 11309572 | 7   | 1275  | 8.22E-09    |
| Chr1 | 11506307 | 11508078 | 6   | 1772  | 2.26E-08    |
| Chr1 | 11511276 | 11512182 | 4   | 907   | 7.65E-07    |
| Chr1 | 11899343 | 11901620 | 6   | 2278  | 8.87527E-06 |
| Chr1 | 12139093 | 12140277 | 7   | 1185  | 2.17E-09    |
| Chr1 | 12141691 | 12143048 | 4   | 1358  | 8.41865E-06 |
| Chr1 | 12173833 | 12176861 | 6   | 3029  | 1.26964E-06 |
| Chr1 | 12376854 | 12377690 | 5   | 837   | 0.000130826 |
| Chr1 | 12406263 | 12410067 | 16  | 3805  | 1.18E-23    |
| Chr1 | 12627843 | 12628523 | 4   | 681   | 3.06819E-06 |
| Chr1 | 12665797 | 12667916 | 6   | 2120  | 1.73E-07    |
| Chr1 | 12671338 | 12672768 | 6   | 1431  | 2.16E-07    |
| Chr1 | 12682680 | 12683297 | 5   | 618   | 6.99E-08    |
| Chr1 | 12715398 | 12717065 | 4   | 1668  | 1.86417E-07 |
| Chr1 | 12820285 | 12823689 | 8   | 3405  | 8.07E-14    |
| Chr1 | 12847563 | 12849409 | 5   | 1847  | 4.87E-07    |
| Chr1 | 12859998 | 12861773 | 5   | 1776  | 1.99102E-06 |
| Chr1 | 13002556 | 13003785 | 10  | 1230  | 9.31E-11    |
| Chr1 | 13011691 | 13012967 | 4   | 1277  | 4.30468E-06 |
| Chr1 | 13019672 | 13022624 | 8   | 2953  | 2.09E-08    |
| Chr1 | 13174379 | 13174890 | 4   | 512   | 1.89E-08    |
| Chr1 | 13177548 | 13179040 | 4   | 1493  | 9.03E-07    |
| Chr1 | 13264005 | 13267118 | 9   | 3114  | 4.74E-11    |
| Chr1 | 13295418 | 13296574 | 4   | 1157  | 0.000683804 |
| Chr1 | 13299251 | 13299902 | 6   | 652   | 1.23774E-06 |
| Chr1 | 13372484 | 13373688 | 5   | 1205  | 1.87885E-07 |
| Chr1 | 13376013 | 13377005 | 4   | 993   | 1.24021E-05 |
| Chr1 | 13381564 | 13383182 | 5   | 1619  | 1.97E-07    |
| Chr1 | 13411303 | 13412852 | 5   | 1550  | 7.50E-08    |
| Chr1 | 13440864 | 13442940 | 6   | 2077  | 4.31E-07    |

|      |          |          |    |      |             |
|------|----------|----------|----|------|-------------|
| Chr1 | 13446855 | 13448092 | 4  | 1238 | 2.82667E-05 |
| Chr1 | 13494423 | 13494810 | 5  | 388  | 2.71E-08    |
| Chr1 | 13518599 | 13519196 | 4  | 598  | 3.15233E-05 |
| Chr1 | 13575075 | 13575729 | 5  | 655  | 1.18E-09    |
| Chr1 | 13579759 | 13581351 | 5  | 1593 | 8.56E-07    |
| Chr1 | 13594002 | 13594647 | 4  | 646  | 8.0277E-05  |
| Chr1 | 13613927 | 13615341 | 5  | 1415 | 7.08E-12    |
| Chr1 | 13643832 | 13646181 | 7  | 2350 | 1.54E-10    |
| Chr1 | 13652467 | 13653592 | 4  | 1126 | 3.37633E-06 |
| Chr1 | 13662566 | 13664354 | 7  | 1789 | 9.23E-10    |
| Chr1 | 13681348 | 13682540 | 5  | 1193 | 3.08565E-05 |
| Chr1 | 13691812 | 13693683 | 4  | 1872 | 2.4966E-05  |
| Chr1 | 13705403 | 13706147 | 4  | 745  | 0.000268155 |
| Chr1 | 13710956 | 13712047 | 6  | 1092 | 3.20E-10    |
| Chr1 | 13720514 | 13721570 | 4  | 1057 | 4.77029E-06 |
| Chr1 | 13726613 | 13727034 | 4  | 422  | 1.35121E-06 |
| Chr1 | 13764193 | 13765767 | 4  | 1575 | 3.29E-09    |
| Chr1 | 13773811 | 13774411 | 6  | 601  | 1.29E-08    |
| Chr1 | 13777757 | 13779476 | 5  | 1720 | 7.09E-08    |
| Chr1 | 13781223 | 13782617 | 6  | 1395 | 4.13E-08    |
| Chr1 | 13783727 | 13784629 | 5  | 903  | 6.40241E-06 |
| Chr1 | 13789052 | 13792502 | 13 | 3451 | 3.24E-19    |
| Chr1 | 13805449 | 13806554 | 4  | 1106 | 5.89535E-05 |
| Chr1 | 13826134 | 13827464 | 10 | 1331 | 2.52E-14    |
| Chr1 | 13828568 | 13831796 | 13 | 3229 | 2.27E-13    |
| Chr1 | 13841370 | 13842253 | 4  | 884  | 6.27E-07    |
| Chr1 | 13916748 | 13919186 | 5  | 2439 | 1.95E-07    |
| Chr1 | 13922987 | 13925092 | 8  | 2106 | 6.18E-09    |
| Chr1 | 13942137 | 13946133 | 11 | 3997 | 2.17E-15    |
| Chr1 | 13951171 | 13951574 | 4  | 404  | 4.92E-07    |
| Chr1 | 13956676 | 13962761 | 16 | 6086 | 2.49E-15    |
| Chr1 | 13970077 | 13971685 | 6  | 1609 | 2.91E-10    |
| Chr1 | 13977918 | 13978491 | 4  | 574  | 1.35E-08    |
| Chr1 | 14022927 | 14023824 | 5  | 898  | 3.07E-10    |
| Chr1 | 14059627 | 14061784 | 5  | 2158 | 1.02162E-05 |
| Chr1 | 14070195 | 14073845 | 8  | 3651 | 1.45E-12    |
| Chr1 | 14083748 | 14085747 | 8  | 2000 | 1.43E-09    |
| Chr1 | 14086961 | 14089421 | 5  | 2461 | 3.65038E-06 |
| Chr1 | 14098717 | 14100625 | 4  | 1909 | 1.64E-09    |
| Chr1 | 14102369 | 14104974 | 9  | 2606 | 1.41E-10    |
| Chr1 | 14120077 | 14121951 | 5  | 1875 | 5.05113E-06 |
| Chr1 | 14125887 | 14127764 | 6  | 1878 | 4.24E-09    |
| Chr1 | 14128998 | 14132353 | 10 | 3356 | 5.05E-15    |
| Chr1 | 14180945 | 14185447 | 10 | 4503 | 1.92E-12    |
| Chr1 | 14193560 | 14194894 | 5  | 1335 | 4.84E-08    |
| Chr1 | 14197403 | 14199218 | 5  | 1816 | 2.32E-08    |
| Chr1 | 14200288 | 14202696 | 6  | 2409 | 2.4499E-05  |
| Chr1 | 14211197 | 14216457 | 15 | 5261 | 1.62E-15    |
| Chr1 | 14222557 | 14223664 | 5  | 1108 | 2.10E-07    |
| Chr1 | 14225589 | 14226535 | 5  | 947  | 1.71E-07    |
| Chr1 | 14235408 | 14237204 | 5  | 1797 | 2.59E-07    |
| Chr1 | 14238306 | 14240108 | 4  | 1803 | 0.000410326 |
| Chr1 | 14243468 | 14244459 | 5  | 992  | 1.69851E-05 |
| Chr1 | 14245902 | 14246244 | 4  | 343  | 1.0962E-05  |
| Chr1 | 14247405 | 14248280 | 4  | 876  | 0.000142823 |
| Chr1 | 14249749 | 14251382 | 8  | 1634 | 1.79E-09    |
| Chr1 | 14253165 | 14255227 | 9  | 2063 | 1.39E-10    |
| Chr1 | 14259288 | 14261706 | 5  | 2419 | 2.87946E-06 |
| Chr1 | 14269443 | 14271212 | 6  | 1770 | 3.90E-09    |
| Chr1 | 14286287 | 14287453 | 6  | 1167 | 4.67E-08    |
| Chr1 | 14313193 | 14314292 | 5  | 1100 | 7.77E-08    |
| Chr1 | 14316475 | 14317931 | 6  | 1457 | 3.95E-09    |
| Chr1 | 14328220 | 14329802 | 5  | 1583 | 4.54762E-05 |

|      |          |          |     |      |             |
|------|----------|----------|-----|------|-------------|
| Chr1 | 14335793 | 14336239 | 5   | 447  | 1.70296E-06 |
| Chr1 | 14388222 | 14389570 | 5   | 1349 | 1.12E-08    |
| Chr1 | 14431304 | 14433554 | 8   | 2251 | 1.73E-08    |
| Chr1 | 14434580 | 14435797 | 8   | 1218 | 3.26E-12    |
| Chr1 | 14437847 | 14440136 | 8   | 2290 | 1.55E-09    |
| Chr1 | 14441995 | 14445609 | 9   | 3615 | 1.21E-12    |
| Chr1 | 14454432 | 14455412 | 5   | 981  | 5.76E-09    |
| Chr1 | 14458415 | 14459418 | 5   | 1004 | 7.93E-09    |
| Chr1 | 14469510 | 14470240 | 5   | 731  | 4.98824E-06 |
| Chr1 | 14476823 | 14479697 | 7   | 2875 | 3.35E-09    |
| Chr1 | 14481018 | 14483636 | 9   | 2619 | 3.46E-13    |
| Chr1 | 14488520 | 14489379 | 5   | 860  | 1.08234E-06 |
| Chr1 | 14493948 | 14495078 | 8   | 1131 | 3.15E-10    |
| Chr1 | 14496262 | 14497075 | 4   | 814  | 1.24188E-06 |
| Chr1 | 14500341 | 14503255 | 12  | 2915 | 2.25E-14    |
| Chr1 | 14505304 | 14506354 | 4   | 1051 | 5.77E-08    |
| Chr1 | 14509623 | 14511167 | 8   | 1545 | 1.75421E-05 |
| Chr1 | 14539113 | 14540667 | 6   | 1555 | 6.47E-09    |
| Chr1 | 14582592 | 14585037 | 8   | 2446 | 1.87E-08    |
| Chr1 | 14588626 | 14589047 | 4   | 422  | 1.0433E-06  |
| Chr1 | 14590198 | 14591458 | 6   | 1261 | 1.37E-09    |
| Chr1 | 14600789 | 14602650 | 8   | 1862 | 5.63E-09    |
| Chr1 | 14720903 | 14722057 | 4   | 1155 | 1.82415E-06 |
| Chr1 | 14837442 | 14840211 | 6   | 2770 | 1.21E-08    |
| Chr1 | 14841675 | 14842512 | 4   | 838  | 9.55571E-06 |
| Chr1 | 14849233 | 14850194 | 5   | 962  | 8.37E-07    |
| Chr1 | 15052068 | 15052272 | 4   | 205  | 0.000822771 |
| Chr1 | 15060128 | 15061114 | 5   | 987  | 1.10E-07    |
| Chr1 | 15067428 | 15068806 | 7   | 1379 | 8.62E-10    |
| Chr1 | 15073247 | 15074617 | 7   | 1371 | 6.73E-09    |
| Chr1 | 15076388 | 15080298 | 14  | 3911 | 3.89E-17    |
| Chr1 | 15081503 | 15086007 | 114 | 4505 | 3.71E-112   |
| Chr1 | 15094112 | 15095482 | 6   | 1371 | 1.50E-08    |
| Chr1 | 15096491 | 15097216 | 5   | 726  | 2.63481E-06 |
| Chr1 | 15099160 | 15103406 | 20  | 4247 | 4.30E-16    |
| Chr1 | 15135923 | 15139000 | 13  | 3078 | 1.06E-14    |
| Chr1 | 15141903 | 15142815 | 4   | 913  | 3.36959E-05 |
| Chr1 | 15151171 | 15152345 | 4   | 1175 | 0.000154763 |
| Chr1 | 15153569 | 15154303 | 8   | 735  | 2.52E-13    |
| Chr1 | 15156700 | 15157123 | 4   | 424  | 7.72E-07    |
| Chr1 | 15158360 | 15164955 | 18  | 6596 | 1.03E-17    |
| Chr1 | 15179618 | 15183342 | 12  | 3725 | 2.97E-14    |
| Chr1 | 15186188 | 15187624 | 6   | 1437 | 1.80E-09    |
| Chr1 | 15198113 | 15199182 | 6   | 1070 | 7.13E-09    |
| Chr1 | 15416871 | 15417659 | 4   | 789  | 0.000112154 |
| Chr1 | 15424493 | 15426705 | 4   | 2213 | 1.80901E-05 |
| Chr1 | 15429077 | 15430340 | 4   | 1264 | 2.83685E-05 |
| Chr1 | 15432430 | 15433377 | 4   | 948  | 2.19E-07    |
| Chr1 | 15436732 | 15438174 | 10  | 1443 | 5.42E-12    |
| Chr1 | 15445363 | 15446595 | 7   | 1233 | 1.39E-09    |
| Chr1 | 15448696 | 15453635 | 13  | 4940 | 2.17E-15    |
| Chr1 | 15488741 | 15490727 | 7   | 1987 | 2.05E-09    |
| Chr1 | 15492199 | 15496334 | 14  | 4136 | 9.25E-15    |
| Chr1 | 15498434 | 15501451 | 9   | 3018 | 1.02E-11    |
| Chr1 | 15502899 | 15504015 | 5   | 1117 | 8.03E-07    |
| Chr1 | 15505854 | 15511672 | 21  | 5819 | 2.78E-27    |
| Chr1 | 15533131 | 15533486 | 4   | 356  | 1.60488E-06 |
| Chr1 | 15534627 | 15535932 | 4   | 1306 | 1.3076E-05  |
| Chr1 | 15538681 | 15540877 | 5   | 2197 | 7.47327E-05 |
| Chr1 | 15542174 | 15544885 | 8   | 2712 | 5.43E-11    |
| Chr1 | 15546505 | 15549738 | 9   | 3234 | 4.08E-13    |
| Chr1 | 15550796 | 15551976 | 5   | 1181 | 0.000283566 |
| Chr1 | 15555925 | 15557926 | 11  | 2002 | 5.54E-13    |

|      |          |          |    |       |             |
|------|----------|----------|----|-------|-------------|
| Chr1 | 15559858 | 15560613 | 4  | 756   | 3.22E-07    |
| Chr1 | 15561735 | 15564016 | 7  | 2282  | 5.13E-12    |
| Chr1 | 15565391 | 15569420 | 10 | 4030  | 1.47E-10    |
| Chr1 | 15573902 | 15574534 | 5  | 633   | 1.00031E-06 |
| Chr1 | 15578718 | 15582747 | 6  | 4030  | 1.75E-09    |
| Chr1 | 15591386 | 15591997 | 4  | 612   | 9.34E-09    |
| Chr1 | 15593307 | 15594696 | 6  | 1390  | 0.00023149  |
| Chr1 | 15611034 | 15612320 | 5  | 1287  | 3.50E-08    |
| Chr1 | 15618623 | 15620732 | 7  | 2110  | 5.64E-10    |
| Chr1 | 15624886 | 15626134 | 4  | 1249  | 6.34E-07    |
| Chr1 | 15638081 | 15640313 | 9  | 2233  | 1.57E-11    |
| Chr1 | 15671129 | 15674116 | 12 | 2988  | 1.85E-15    |
| Chr1 | 15677195 | 15679882 | 9  | 2688  | 6.15E-11    |
| Chr1 | 15682526 | 15685444 | 8  | 2919  | 8.72E-10    |
| Chr1 | 15697587 | 15701408 | 10 | 3822  | 4.59E-10    |
| Chr1 | 15703147 | 15706783 | 9  | 3637  | 1.30E-11    |
| Chr1 | 15708630 | 15709545 | 4  | 916   | 0.000175028 |
| Chr1 | 15711508 | 15711788 | 4  | 281   | 1.00069E-05 |
| Chr1 | 15713056 | 15715575 | 9  | 2520  | 2.53E-10    |
| Chr1 | 15801346 | 15804760 | 12 | 3415  | 1.52E-13    |
| Chr1 | 15817659 | 15818513 | 4  | 855   | 2.79544E-07 |
| Chr1 | 15854470 | 15855456 | 7  | 987   | 1.67E-10    |
| Chr1 | 15870416 | 15873810 | 8  | 3395  | 3.24E-09    |
| Chr1 | 15876333 | 15877475 | 4  | 1143  | 2.19904E-06 |
| Chr1 | 16006145 | 16007628 | 4  | 1484  | 0.000316162 |
| Chr1 | 16093656 | 16097009 | 7  | 3354  | 1.36E-10    |
| Chr1 | 16098380 | 16100040 | 4  | 1661  | 1.27365E-06 |
| Chr1 | 16101965 | 16105166 | 14 | 3202  | 4.55E-16    |
| Chr1 | 16107759 | 16109496 | 5  | 1738  | 5.95622E-07 |
| Chr1 | 16117806 | 16119587 | 5  | 1782  | 6.07241E-05 |
| Chr1 | 16122688 | 16124066 | 7  | 1379  | 1.52E-08    |
| Chr1 | 16177316 | 16178418 | 6  | 1103  | 5.11E-09    |
| Chr1 | 16189355 | 16190870 | 4  | 1516  | 3.08431E-05 |
| Chr1 | 16198276 | 16199069 | 4  | 794   | 2.56E-07    |
| Chr1 | 16200300 | 16202400 | 5  | 2101  | 4.52E-08    |
| Chr1 | 16240127 | 16240403 | 4  | 277   | 0.000214161 |
| Chr1 | 16319612 | 16321138 | 7  | 1527  | 3.15E-10    |
| Chr1 | 16335910 | 16337575 | 5  | 1666  | 2.10E-08    |
| Chr1 | 16368434 | 16369810 | 4  | 1377  | 3.4337E-05  |
| Chr1 | 16377392 | 16379222 | 7  | 1831  | 6.81347E-07 |
| Chr1 | 16381154 | 16381688 | 5  | 535   | 1.50696E-06 |
| Chr1 | 16383040 | 16384267 | 4  | 1228  | 6.20E-08    |
| Chr1 | 16431027 | 16431831 | 4  | 805   | 2.10818E-06 |
| Chr1 | 16488936 | 16491435 | 9  | 2500  | 6.78E-10    |
| Chr1 | 16510103 | 16511404 | 11 | 1302  | 4.34E-10    |
| Chr1 | 16512836 | 16515003 | 10 | 2168  | 7.69E-11    |
| Chr1 | 16516028 | 16529551 | 61 | 13524 | 1.71E-59    |
| Chr1 | 16557179 | 16558724 | 4  | 1546  | 2.88104E-06 |
| Chr1 | 16585633 | 16586513 | 5  | 881   | 5.45E-11    |
| Chr1 | 16610106 | 16610794 | 5  | 689   | 1.49294E-06 |
| Chr1 | 16626519 | 16628131 | 6  | 1613  | 9.23E-09    |
| Chr1 | 16661170 | 16663941 | 8  | 2772  | 2.15E-10    |
| Chr1 | 16676000 | 16677027 | 5  | 1028  | 1.62E-07    |
| Chr1 | 16678031 | 16679586 | 5  | 1556  | 1.19E-08    |
| Chr1 | 16680904 | 16682476 | 4  | 1573  | 2.76E-08    |
| Chr1 | 16695928 | 16698586 | 7  | 2659  | 5.51E-13    |
| Chr1 | 16711771 | 16712746 | 6  | 976   | 9.79E-10    |
| Chr1 | 16718374 | 16718525 | 7  | 152   | 3.09E-11    |
| Chr1 | 16726639 | 16729974 | 7  | 3336  | 1.54E-07    |
| Chr1 | 16942838 | 16943670 | 4  | 833   | 1.0664E-05  |
| Chr1 | 16944742 | 16946107 | 5  | 1366  | 2.34E-08    |
| Chr1 | 16959321 | 16960463 | 4  | 1143  | 7.00408E-06 |
| Chr1 | 17028035 | 17028969 | 5  | 935   | 4.63E-08    |

|      |          |          |     |      |             |
|------|----------|----------|-----|------|-------------|
| Chr1 | 17036510 | 17042493 | 19  | 5984 | 8.38E-22    |
| Chr1 | 17047131 | 17048473 | 5   | 1343 | 6.41E-08    |
| Chr1 | 17072439 | 17073532 | 4   | 1094 | 9.49E-08    |
| Chr1 | 17256033 | 17259387 | 8   | 3355 | 6.83E-11    |
| Chr1 | 17260608 | 17263497 | 8   | 2890 | 2.01E-10    |
| Chr1 | 17305750 | 17305782 | 5   | 33   | 2.88E-09    |
| Chr1 | 17363492 | 17365843 | 7   | 2352 | 1.41E-09    |
| Chr1 | 17521786 | 17525095 | 16  | 3310 | 4.40E-18    |
| Chr1 | 17608513 | 17608910 | 5   | 398  | 2.01E-09    |
| Chr1 | 17677306 | 17678578 | 6   | 1273 | 1.15618E-05 |
| Chr1 | 17680788 | 17681756 | 4   | 969  | 0.000207093 |
| Chr1 | 17842365 | 17845158 | 9   | 2794 | 1.28E-12    |
| Chr1 | 17846632 | 17846695 | 5   | 64   | 3.47E-07    |
| Chr1 | 18380329 | 18380962 | 4   | 634  | 3.21E-09    |
| Chr1 | 18790120 | 18790164 | 5   | 45   | 1.80E-08    |
| Chr1 | 18894703 | 18894945 | 4   | 243  | 7.79952E-06 |
| Chr1 | 18965091 | 18967490 | 7   | 2400 | 1.35E-07    |
| Chr1 | 18969416 | 18969928 | 4   | 513  | 0.000627102 |
| Chr1 | 19336334 | 19339109 | 12  | 2776 | 3.85E-13    |
| Chr1 | 19342526 | 19343980 | 4   | 1455 | 1.52805E-05 |
| Chr1 | 19345245 | 19345428 | 4   | 184  | 4.74548E-06 |
| Chr1 | 20087166 | 20088880 | 4   | 1715 | 0.000108414 |
| Chr1 | 20313844 | 20315876 | 6   | 2033 | 3.33E-11    |
| Chr1 | 20317869 | 20319482 | 4   | 1614 | 6.04E-08    |
| Chr1 | 21245872 | 21248829 | 11  | 2958 | 7.41E-17    |
| Chr1 | 21748605 | 21753429 | 21  | 4825 | 9.23E-26    |
| Chr1 | 22084923 | 22085562 | 4   | 640  | 1.93894E-06 |
| Chr1 | 22100994 | 22103409 | 5   | 2416 | 3.32322E-06 |
| Chr1 | 22694186 | 22696674 | 10  | 2489 | 1.07E-09    |
| Chr1 | 23240308 | 23240349 | 4   | 42   | 3.11393E-06 |
| Chr1 | 23280611 | 23281130 | 4   | 520  | 1.01541E-05 |
| Chr1 | 23651611 | 23651935 | 4   | 325  | 1.2693E-06  |
| Chr1 | 23711314 | 23711413 | 4   | 100  | 7.08E-07    |
| Chr1 | 23927035 | 23928172 | 5   | 1138 | 9.82251E-06 |
| Chr1 | 24272882 | 24275686 | 100 | 2805 | 3.16E-132   |
| Chr1 | 24456852 | 24458056 | 4   | 1205 | 1.33E-07    |
| Chr1 | 25145949 | 25146687 | 4   | 739  | 1.73521E-05 |
| Chr1 | 25159339 | 25163315 | 12  | 3977 | 1.75E-11    |
| Chr1 | 26367395 | 26371098 | 14  | 3704 | 5.10E-18    |
| Chr1 | 27068247 | 27068673 | 4   | 427  | 3.87E-08    |
| Chr1 | 27923740 | 27924566 | 5   | 827  | 1.46E-16    |
| Chr1 | 29379410 | 29380457 | 4   | 1048 | 0.000105314 |
| Chr1 | 29474607 | 29478335 | 8   | 3729 | 3.32E-08    |
| Chr2 | 1092     | 3775     | 174 | 2684 | 8e-323      |
| Chr2 | 5458     | 6203     | 45  | 746  | 9.38E-70    |
| Chr2 | 9478     | 13032    | 81  | 3555 | 4.76E-189   |
| Chr2 | 39314    | 40830    | 7   | 1517 | 2.68E-09    |
| Chr2 | 43405    | 45396    | 6   | 1992 | 6.39E-08    |
| Chr2 | 65168    | 66825    | 5   | 1658 | 8.76E-09    |
| Chr2 | 254259   | 254445   | 4   | 187  | 3.68077E-07 |
| Chr2 | 374844   | 377902   | 8   | 3059 | 2.37E-12    |
| Chr2 | 532154   | 536825   | 15  | 4672 | 3.90E-16    |
| Chr2 | 567836   | 568689   | 4   | 854  | 2.76446E-06 |
| Chr2 | 573000   | 574846   | 5   | 1847 | 1.28E-07    |
| Chr2 | 823369   | 824775   | 6   | 1407 | 8.89E-12    |
| Chr2 | 926796   | 927895   | 5   | 1100 | 9.77E-08    |
| Chr2 | 1402373  | 1403426  | 4   | 1054 | 3.52E-07    |
| Chr2 | 1486305  | 1487045  | 4   | 741  | 1.8825E-05  |
| Chr2 | 1741892  | 1742164  | 4   | 273  | 4.03165E-06 |
| Chr2 | 1883430  | 1884500  | 7   | 1071 | 2.61E-09    |
| Chr2 | 1956074  | 1958411  | 4   | 2338 | 4.72E-07    |
| Chr2 | 2003343  | 2005179  | 7   | 1837 | 2.47E-10    |
| Chr2 | 2036668  | 2038659  | 6   | 1992 | 1.18E-12    |



|      |         |         |    |      |             |
|------|---------|---------|----|------|-------------|
| Chr2 | 2041903 | 2043603 | 4  | 1701 | 7.07E-07    |
| Chr2 | 2051419 | 2052668 | 4  | 1250 | 2.41E-07    |
| Chr2 | 2059118 | 2060118 | 4  | 1001 | 1.20252E-05 |
| Chr2 | 2074755 | 2075400 | 4  | 646  | 5.15724E-06 |
| Chr2 | 2079218 | 2080103 | 5  | 886  | 1.78811E-05 |
| Chr2 | 2082175 | 2082296 | 4  | 122  | 2.78E-08    |
| Chr2 | 2104528 | 2105695 | 4  | 1168 | 3.99454E-06 |
| Chr2 | 2112296 | 2112661 | 4  | 366  | 9.24599E-06 |
| Chr2 | 2113726 | 2114685 | 5  | 960  | 2.16E-11    |
| Chr2 | 2148780 | 2148953 | 4  | 174  | 0.00016956  |
| Chr2 | 2202210 | 2204006 | 4  | 1797 | 0.000144828 |
| Chr2 | 2278500 | 2279170 | 4  | 671  | 4.06377E-05 |
| Chr2 | 2302788 | 2305507 | 6  | 2720 | 5.52E-09    |
| Chr2 | 2367432 | 2368250 | 5  | 819  | 1.53E-07    |
| Chr2 | 2376017 | 2380820 | 19 | 4804 | 3.63E-27    |
| Chr2 | 2386845 | 2387916 | 4  | 1072 | 7.1541E-06  |
| Chr2 | 2392354 | 2392751 | 4  | 398  | 8.89E-08    |
| Chr2 | 2397048 | 2400578 | 7  | 3531 | 5.63E-10    |
| Chr2 | 2404593 | 2408292 | 8  | 3700 | 2.82E-10    |
| Chr2 | 2418190 | 2420276 | 4  | 2087 | 5.01464E-05 |
| Chr2 | 2440110 | 2441875 | 5  | 1766 | 3.29E-08    |
| Chr2 | 2464727 | 2465673 | 4  | 947  | 5.79E-07    |
| Chr2 | 2482016 | 2483232 | 5  | 1217 | 1.32E-09    |
| Chr2 | 2489339 | 2491771 | 8  | 2433 | 3.12E-09    |
| Chr2 | 2493103 | 2493752 | 5  | 650  | 1.80E-07    |
| Chr2 | 2499714 | 2500681 | 5  | 968  | 1.44E-07    |
| Chr2 | 2507971 | 2511453 | 10 | 3483 | 4.51E-12    |
| Chr2 | 2531502 | 2534029 | 5  | 2528 | 8.93E-07    |
| Chr2 | 2564344 | 2565586 | 4  | 1243 | 6.80494E-06 |
| Chr2 | 2576516 | 2577471 | 7  | 956  | 1.84E-11    |
| Chr2 | 2603075 | 2604375 | 4  | 1301 | 3.5133E-06  |
| Chr2 | 2617545 | 2619210 | 4  | 1666 | 5.28395E-05 |
| Chr2 | 2623387 | 2625692 | 12 | 2306 | 2.41E-15    |
| Chr2 | 2644766 | 2645911 | 5  | 1146 | 1.49E-08    |
| Chr2 | 2648173 | 2650597 | 5  | 2425 | 2.44E-08    |
| Chr2 | 2664889 | 2665313 | 4  | 425  | 2.74926E-05 |
| Chr2 | 2684047 | 2685568 | 5  | 1522 | 1.77233E-06 |
| Chr2 | 2692025 | 2693213 | 6  | 1189 | 4.45E-09    |
| Chr2 | 2711808 | 2712196 | 5  | 389  | 8.32E-11    |
| Chr2 | 2717823 | 2719945 | 7  | 2123 | 9.50E-11    |
| Chr2 | 2745411 | 2749503 | 7  | 4093 | 3.24E-09    |
| Chr2 | 2751109 | 2751827 | 4  | 719  | 1.43131E-06 |
| Chr2 | 2771036 | 2772107 | 4  | 1072 | 6.54643E-05 |
| Chr2 | 2790418 | 2790520 | 5  | 103  | 6.51E-10    |
| Chr2 | 2797467 | 2799122 | 5  | 1656 | 6.25E-07    |
| Chr2 | 2805399 | 2805568 | 4  | 170  | 3.56E-07    |
| Chr2 | 2808660 | 2809633 | 4  | 974  | 5.92146E-05 |
| Chr2 | 2817485 | 2819159 | 6  | 1675 | 6.74976E-05 |
| Chr2 | 2829257 | 2830575 | 4  | 1319 | 2.71597E-06 |
| Chr2 | 2835295 | 2835636 | 4  | 342  | 3.06E-07    |
| Chr2 | 2855293 | 2857236 | 6  | 1944 | 4.47E-10    |
| Chr2 | 2878764 | 2882400 | 13 | 3637 | 7.04E-14    |
| Chr2 | 2902343 | 2903652 | 5  | 1310 | 4.84E-07    |
| Chr2 | 2932488 | 2933998 | 5  | 1511 | 5.03E-08    |
| Chr2 | 3001418 | 3001632 | 4  | 215  | 5.49E-08    |
| Chr2 | 3060891 | 3061843 | 4  | 953  | 1.43863E-06 |
| Chr2 | 3066196 | 3066674 | 7  | 479  | 7.47E-12    |
| Chr2 | 3077625 | 3078907 | 6  | 1283 | 2.79E-07    |
| Chr2 | 3082177 | 3085328 | 9  | 3152 | 4.25E-13    |
| Chr2 | 3086759 | 3088782 | 9  | 2024 | 8.83E-12    |
| Chr2 | 3090707 | 3091556 | 8  | 850  | 2.78E-11    |
| Chr2 | 3100315 | 3102057 | 8  | 1743 | 1.68E-10    |
| Chr2 | 3103141 | 3104280 | 8  | 1140 | 7.47E-10    |

|      |         |         |      |       |             |
|------|---------|---------|------|-------|-------------|
| Chr2 | 3105839 | 3107025 | 4    | 1187  | 1.13991E-06 |
| Chr2 | 3214294 | 3215580 | 4    | 1287  | 6.16E-07    |
| Chr2 | 3225754 | 3227643 | 7    | 1890  | 1.64259E-06 |
| Chr2 | 3230953 | 3232550 | 5    | 1598  | 3.12E-07    |
| Chr2 | 3240761 | 3242111 | 12   | 1351  | 2.50E-14    |
| Chr2 | 3244750 | 3244955 | 6    | 206   | 1.73E-10    |
| Chr2 | 3247284 | 3261949 | 226  | 14666 | 7.40E-248   |
| Chr2 | 3263055 | 3297655 | 827  | 34601 | 0           |
| Chr2 | 3299936 | 3311541 | 177  | 11606 | 7.71E-201   |
| Chr2 | 3312666 | 3320504 | 148  | 7839  | 1.22E-175   |
| Chr2 | 3321815 | 3367962 | 1022 | 46148 | 0           |
| Chr2 | 3376890 | 3379027 | 26   | 2138  | 1.00E-31    |
| Chr2 | 3381715 | 3382098 | 16   | 384   | 1.39E-25    |
| Chr2 | 3398412 | 3400702 | 18   | 2291  | 1.90E-18    |
| Chr2 | 3406484 | 3406677 | 4    | 194   | 1.67025E-05 |
| Chr2 | 3408872 | 3409047 | 5    | 176   | 1.65E-10    |
| Chr2 | 3423567 | 3423721 | 5    | 155   | 1.04E-07    |
| Chr2 | 3434179 | 3434541 | 11   | 363   | 8.01E-16    |
| Chr2 | 3438177 | 3438833 | 8    | 657   | 4.04E-09    |
| Chr2 | 3447446 | 3447618 | 9    | 173   | 7.12E-14    |
| Chr2 | 3454064 | 3454220 | 5    | 157   | 2.49678E-06 |
| Chr2 | 3458864 | 3461297 | 25   | 2434  | 8.88E-19    |
| Chr2 | 3463348 | 3465339 | 10   | 1992  | 5.55E-12    |
| Chr2 | 3466829 | 3467147 | 8    | 319   | 1.30E-11    |
| Chr2 | 3468234 | 3469262 | 8    | 1029  | 2.20E-11    |
| Chr2 | 3475753 | 3476445 | 15   | 693   | 9.44E-21    |
| Chr2 | 3478235 | 3478396 | 5    | 162   | 2.82E-10    |
| Chr2 | 3483901 | 3486697 | 19   | 2797  | 2.47E-21    |
| Chr2 | 3487727 | 3489221 | 12   | 1495  | 5.99E-15    |
| Chr2 | 3490388 | 3491210 | 5    | 823   | 2.28154E-06 |
| Chr2 | 3492258 | 3493588 | 16   | 1331  | 3.87E-14    |
| Chr2 | 3498065 | 3498514 | 6    | 450   | 9.86E-09    |
| Chr2 | 3509175 | 3509621 | 10   | 447   | 4.02E-12    |
| Chr2 | 3520749 | 3522332 | 6    | 1584  | 2.45E-08    |
| Chr2 | 3536862 | 3539380 | 8    | 2519  | 1.91E-11    |
| Chr2 | 3542739 | 3545922 | 6    | 3184  | 3.45E-07    |
| Chr2 | 3547942 | 3552241 | 17   | 4300  | 1.54E-16    |
| Chr2 | 3554917 | 3556710 | 5    | 1794  | 2.92E-08    |
| Chr2 | 3564986 | 3565483 | 4    | 498   | 1.18E-08    |
| Chr2 | 3605525 | 3607555 | 61   | 2031  | 8.86E-88    |
| Chr2 | 3614958 | 3628039 | 505  | 13082 | 0           |
| Chr2 | 3640045 | 3645305 | 13   | 5261  | 1.88E-15    |
| Chr2 | 3656712 | 3656866 | 4    | 155   | 3.00E-08    |
| Chr2 | 3662341 | 3663077 | 4    | 737   | 0.000241634 |
| Chr2 | 3681903 | 3683425 | 4    | 1523  | 5.30293E-06 |
| Chr2 | 3686830 | 3688434 | 7    | 1605  | 1.99E-08    |
| Chr2 | 3710541 | 3711271 | 4    | 731   | 3.43881E-06 |
| Chr2 | 3713224 | 3714820 | 4    | 1597  | 4.84E-09    |
| Chr2 | 3717874 | 3718327 | 7    | 454   | 5.76916E-06 |
| Chr2 | 3721722 | 3723868 | 5    | 2147  | 3.10352E-05 |
| Chr2 | 3737318 | 3738201 | 5    | 884   | 3.91E-07    |
| Chr2 | 3739780 | 3741238 | 4    | 1459  | 3.33E-07    |
| Chr2 | 3752637 | 3753017 | 4    | 381   | 4.11E-08    |
| Chr2 | 3760335 | 3762249 | 5    | 1915  | 5.41277E-06 |
| Chr2 | 3763873 | 3768979 | 18   | 5107  | 7.47E-21    |
| Chr2 | 3770435 | 3771561 | 5    | 1127  | 4.45E-08    |
| Chr2 | 3822066 | 3823394 | 4    | 1329  | 8.73E-07    |
| Chr2 | 3849308 | 3853284 | 13   | 3977  | 3.46E-15    |
| Chr2 | 3857480 | 3865140 | 25   | 7661  | 2.52E-28    |
| Chr2 | 3867787 | 3870218 | 6    | 2432  | 5.02E-09    |
| Chr2 | 3871232 | 3873478 | 9    | 2247  | 1.13E-10    |
| Chr2 | 3878875 | 3880221 | 5    | 1347  | 3.11E-07    |
| Chr2 | 3883687 | 3887715 | 10   | 4029  | 1.72E-12    |

|      |         |         |    |      |             |
|------|---------|---------|----|------|-------------|
| Chr2 | 3919898 | 3922484 | 10 | 2587 | 3.23E-15    |
| Chr2 | 3943328 | 3944931 | 4  | 1604 | 1.96E-08    |
| Chr2 | 3948619 | 3949370 | 6  | 752  | 9.59E-10    |
| Chr2 | 3950926 | 3953162 | 13 | 2237 | 4.17E-14    |
| Chr2 | 3955930 | 3956501 | 4  | 572  | 0.000137906 |
| Chr2 | 3961723 | 3963460 | 6  | 1738 | 8.90E-08    |
| Chr2 | 3973827 | 3975466 | 9  | 1640 | 5.24E-12    |
| Chr2 | 3980712 | 3981484 | 4  | 773  | 1.57E-08    |
| Chr2 | 3983960 | 3985171 | 4  | 1212 | 1.80809E-06 |
| Chr2 | 3994571 | 3995560 | 4  | 990  | 1.17E-07    |
| Chr2 | 4008460 | 4009799 | 5  | 1340 | 1.22E-08    |
| Chr2 | 4014447 | 4016074 | 5  | 1628 | 1.45929E-06 |
| Chr2 | 4050880 | 4052987 | 7  | 2108 | 3.86E-09    |
| Chr2 | 4055409 | 4057039 | 4  | 1631 | 1.70079E-06 |
| Chr2 | 4064276 | 4065170 | 5  | 895  | 5.21854E-06 |
| Chr2 | 4091879 | 4096305 | 15 | 4427 | 2.46E-20    |
| Chr2 | 4110572 | 4112711 | 6  | 2140 | 2.70185E-06 |
| Chr2 | 4116804 | 4120091 | 9  | 3288 | 8.70E-13    |
| Chr2 | 4121540 | 4123329 | 5  | 1790 | 1.97E-07    |
| Chr2 | 4124726 | 4125884 | 4  | 1159 | 0.000157956 |
| Chr2 | 4130122 | 4131811 | 12 | 1690 | 1.92E-21    |
| Chr2 | 4171733 | 4172245 | 4  | 513  | 2.88E-07    |
| Chr2 | 4176355 | 4176925 | 4  | 571  | 1.31729E-05 |
| Chr2 | 4182314 | 4187064 | 16 | 4751 | 1.45E-21    |
| Chr2 | 4201239 | 4201994 | 4  | 756  | 1.24212E-05 |
| Chr2 | 4218436 | 4220409 | 4  | 1974 | 5.20913E-06 |
| Chr2 | 4228870 | 4230162 | 5  | 1293 | 1.51E-08    |
| Chr2 | 4238581 | 4240230 | 11 | 1650 | 1.15E-15    |
| Chr2 | 4241541 | 4242842 | 6  | 1302 | 4.30409E-07 |
| Chr2 | 4253093 | 4254307 | 6  | 1215 | 1.29E-10    |
| Chr2 | 4258194 | 4261230 | 9  | 3037 | 1.79E-12    |
| Chr2 | 4276637 | 4278833 | 7  | 2197 | 1.25E-10    |
| Chr2 | 4280315 | 4280618 | 5  | 304  | 1.3637E-06  |
| Chr2 | 4284306 | 4285502 | 6  | 1197 | 5.39E-10    |
| Chr2 | 4288379 | 4294770 | 23 | 6392 | 2.90E-30    |
| Chr2 | 4369351 | 4370476 | 4  | 1126 | 6.96E-07    |
| Chr2 | 4375509 | 4376991 | 4  | 1483 | 5.57533E-06 |
| Chr2 | 4378769 | 4387677 | 21 | 8909 | 9.52E-27    |
| Chr2 | 4392809 | 4396430 | 12 | 3622 | 2.90E-15    |
| Chr2 | 4398351 | 4402794 | 11 | 4444 | 7.88E-18    |
| Chr2 | 4405181 | 4406517 | 5  | 1337 | 2.96E-09    |
| Chr2 | 4408125 | 4410429 | 4  | 2305 | 2.24531E-06 |
| Chr2 | 4468156 | 4469865 | 4  | 1710 | 1.79E-07    |
| Chr2 | 4490187 | 4493174 | 11 | 2988 | 8.08E-13    |
| Chr2 | 4494240 | 4494721 | 4  | 482  | 4.23859E-06 |
| Chr2 | 4495949 | 4497568 | 8  | 1620 | 3.62E-08    |
| Chr2 | 4510454 | 4511793 | 4  | 1340 | 4.5196E-06  |
| Chr2 | 4519754 | 4522859 | 11 | 3106 | 7.35E-11    |
| Chr2 | 4532227 | 4533257 | 4  | 1031 | 7.65164E-06 |
| Chr2 | 4565733 | 4567297 | 4  | 1565 | 6.51E-07    |
| Chr2 | 4570130 | 4570862 | 6  | 733  | 3.31E-08    |
| Chr2 | 4572805 | 4574271 | 4  | 1467 | 5.96663E-06 |
| Chr2 | 4579001 | 4582222 | 13 | 3222 | 1.79E-15    |
| Chr2 | 4597385 | 4599984 | 7  | 2600 | 1.34E-10    |
| Chr2 | 4613162 | 4615348 | 4  | 2187 | 1.87976E-05 |
| Chr2 | 4641605 | 4643585 | 7  | 1981 | 2.24E-09    |
| Chr2 | 4658147 | 4661050 | 6  | 2904 | 9.61E-10    |
| Chr2 | 4670940 | 4671493 | 4  | 554  | 1.04687E-05 |
| Chr2 | 4676599 | 4676686 | 4  | 88   | 0.000883773 |
| Chr2 | 4681726 | 4683797 | 5  | 2072 | 3.97E-10    |
| Chr2 | 4688149 | 4689628 | 7  | 1480 | 1.01E-07    |
| Chr2 | 4695802 | 4697707 | 6  | 1906 | 1.50E-09    |
| Chr2 | 4698788 | 4700671 | 6  | 1884 | 1.44E-08    |

|      |         |         |    |      |             |
|------|---------|---------|----|------|-------------|
| Chr2 | 4704654 | 4707660 | 10 | 3007 | 5.63E-13    |
| Chr2 | 4710923 | 4712685 | 8  | 1763 | 6.71E-10    |
| Chr2 | 4715133 | 4718467 | 11 | 3335 | 5.57E-13    |
| Chr2 | 4720410 | 4723530 | 11 | 3121 | 5.87E-12    |
| Chr2 | 4726116 | 4728418 | 7  | 2303 | 3.89E-08    |
| Chr2 | 4730827 | 4732873 | 6  | 2047 | 9.59E-09    |
| Chr2 | 4734505 | 4735318 | 4  | 814  | 3.65842E-05 |
| Chr2 | 4738127 | 4739356 | 6  | 1230 | 3.11E-11    |
| Chr2 | 4808187 | 4809887 | 5  | 1701 | 1.23951E-05 |
| Chr2 | 4812717 | 4818233 | 16 | 5517 | 1.26E-22    |
| Chr2 | 4825531 | 4826227 | 4  | 697  | 1.61347E-06 |
| Chr2 | 4834668 | 4835217 | 5  | 550  | 7.58E-09    |
| Chr2 | 4840286 | 4841790 | 11 | 1505 | 1.13E-13    |
| Chr2 | 4843768 | 4844235 | 5  | 468  | 3.80E-09    |
| Chr2 | 4852614 | 4854870 | 6  | 2257 | 4.37E-07    |
| Chr2 | 4878139 | 4878495 | 4  | 357  | 3.3948E-05  |
| Chr2 | 4894948 | 4895967 | 6  | 1020 | 1.02E-08    |
| Chr2 | 4900701 | 4905153 | 14 | 4453 | 7.66E-15    |
| Chr2 | 4908108 | 4908843 | 8  | 736  | 9.19E-09    |
| Chr2 | 4927144 | 4930048 | 8  | 2905 | 4.31E-09    |
| Chr2 | 4935780 | 4936757 | 6  | 978  | 9.77669E-06 |
| Chr2 | 4951061 | 4953408 | 5  | 2348 | 1.47719E-07 |
| Chr2 | 4973921 | 4976346 | 6  | 2426 | 7.09E-08    |
| Chr2 | 4978465 | 4980016 | 11 | 1552 | 1.05E-13    |
| Chr2 | 4982268 | 4983475 | 5  | 1208 | 3.87786E-06 |
| Chr2 | 4984772 | 4986430 | 5  | 1659 | 1.69459E-06 |
| Chr2 | 4990447 | 4992605 | 6  | 2159 | 3.78663E-06 |
| Chr2 | 4997617 | 5001354 | 11 | 3738 | 2.66E-17    |
| Chr2 | 5023099 | 5024689 | 5  | 1591 | 7.32E-09    |
| Chr2 | 5033491 | 5036937 | 9  | 3447 | 1.91E-09    |
| Chr2 | 5038592 | 5040268 | 5  | 1677 | 3.16E-08    |
| Chr2 | 5058428 | 5059804 | 5  | 1377 | 6.66109E-05 |
| Chr2 | 5085932 | 5086849 | 5  | 918  | 3.75E-08    |
| Chr2 | 5088633 | 5090549 | 6  | 1917 | 3.21E-07    |
| Chr2 | 5092398 | 5093372 | 4  | 975  | 0.00026037  |
| Chr2 | 5099753 | 5102154 | 10 | 2402 | 6.41E-12    |
| Chr2 | 5103554 | 5106032 | 7  | 2479 | 2.07E-07    |
| Chr2 | 5122454 | 5124751 | 6  | 2298 | 3.00E-08    |
| Chr2 | 5129139 | 5129711 | 5  | 573  | 3.01E-09    |
| Chr2 | 5130825 | 5134420 | 12 | 3596 | 8.76E-13    |
| Chr2 | 5138567 | 5140274 | 5  | 1708 | 6.54865E-06 |
| Chr2 | 5173066 | 5174352 | 4  | 1287 | 1.49274E-05 |
| Chr2 | 5176075 | 5177544 | 6  | 1470 | 1.03E-07    |
| Chr2 | 5183359 | 5184632 | 5  | 1274 | 6.43E-07    |
| Chr2 | 5191608 | 5192256 | 5  | 649  | 3.36702E-06 |
| Chr2 | 5233947 | 5237165 | 12 | 3219 | 1.73E-14    |
| Chr2 | 5252539 | 5253914 | 7  | 1376 | 3.53E-07    |
| Chr2 | 5256434 | 5257168 | 4  | 735  | 3.82906E-05 |
| Chr2 | 5279410 | 5281830 | 7  | 2421 | 6.41E-12    |
| Chr2 | 5284195 | 5285120 | 4  | 926  | 5.32015E-06 |
| Chr2 | 5297749 | 5299151 | 5  | 1403 | 9.85296E-06 |
| Chr2 | 5301132 | 5302095 | 4  | 964  | 1.81045E-06 |
| Chr2 | 5325044 | 5326798 | 4  | 1755 | 1.4758E-06  |
| Chr2 | 5327987 | 5332781 | 9  | 4795 | 1.22E-08    |
| Chr2 | 5339411 | 5341201 | 5  | 1791 | 3.02809E-06 |
| Chr2 | 5357416 | 5362317 | 10 | 4902 | 1.50E-13    |
| Chr2 | 5363455 | 5364077 | 4  | 623  | 4.13E-07    |
| Chr2 | 5365136 | 5367649 | 7  | 2514 | 1.21E-09    |
| Chr2 | 5369428 | 5372130 | 8  | 2703 | 3.24E-09    |
| Chr2 | 5379507 | 5382684 | 6  | 3178 | 3.45E-08    |
| Chr2 | 5386926 | 5389406 | 9  | 2481 | 6.37E-10    |
| Chr2 | 5443170 | 5443921 | 5  | 752  | 1.91E-08    |
| Chr2 | 5469891 | 5470861 | 4  | 971  | 1.82E-07    |

|      |         |         |    |      |             |
|------|---------|---------|----|------|-------------|
| Chr2 | 5472265 | 5472781 | 4  | 517  | 1.84314E-05 |
| Chr2 | 5478221 | 5479481 | 5  | 1261 | 7.08017E-07 |
| Chr2 | 5487569 | 5488882 | 5  | 1314 | 2.74E-08    |
| Chr2 | 5497016 | 5498324 | 6  | 1309 | 1.85E-07    |
| Chr2 | 5524182 | 5524844 | 5  | 663  | 6.083E-06   |
| Chr2 | 5529914 | 5533610 | 11 | 3697 | 3.18E-13    |
| Chr2 | 5559665 | 5562390 | 9  | 2726 | 5.01E-12    |
| Chr2 | 5563408 | 5564486 | 4  | 1079 | 1.11605E-05 |
| Chr2 | 5566770 | 5568096 | 10 | 1327 | 1.54E-15    |
| Chr2 | 5570306 | 5571911 | 6  | 1606 | 4.01E-08    |
| Chr2 | 5573225 | 5575846 | 12 | 2622 | 1.19E-14    |
| Chr2 | 5600506 | 5603032 | 7  | 2527 | 4.09E-10    |
| Chr2 | 5604257 | 5605974 | 8  | 1718 | 4.83E-13    |
| Chr2 | 5619043 | 5620552 | 8  | 1510 | 3.49E-10    |
| Chr2 | 5621621 | 5623057 | 4  | 1437 | 6.17E-07    |
| Chr2 | 5632716 | 5636861 | 10 | 4146 | 1.41E-14    |
| Chr2 | 5658642 | 5660022 | 4  | 1381 | 5.19E-07    |
| Chr2 | 5712190 | 5713670 | 9  | 1481 | 8.82E-13    |
| Chr2 | 5778463 | 5780313 | 5  | 1851 | 1.85365E-05 |
| Chr2 | 5784622 | 5785738 | 5  | 1117 | 3.23E-07    |
| Chr2 | 5809919 | 5811853 | 5  | 1935 | 2.12E-08    |
| Chr2 | 5826404 | 5826830 | 4  | 427  | 7.29E-11    |
| Chr2 | 5829572 | 5830529 | 4  | 958  | 3.09118E-06 |
| Chr2 | 5884587 | 5885721 | 5  | 1135 | 0.000129968 |
| Chr2 | 5895473 | 5897059 | 6  | 1587 | 8.16E-13    |
| Chr2 | 5902212 | 5903856 | 6  | 1645 | 2.15E-07    |
| Chr2 | 5984168 | 5985715 | 4  | 1548 | 0.000529613 |
| Chr2 | 5986776 | 5988912 | 9  | 2137 | 2.24E-12    |
| Chr2 | 5991814 | 5993642 | 7  | 1829 | 5.89E-10    |
| Chr2 | 5995708 | 5995997 | 4  | 290  | 1.26621E-06 |
| Chr2 | 5999307 | 6000396 | 6  | 1090 | 4.23E-08    |
| Chr2 | 6007779 | 6009174 | 4  | 1396 | 2.06192E-06 |
| Chr2 | 6010858 | 6011903 | 5  | 1046 | 1.61E-10    |
| Chr2 | 6026994 | 6028102 | 6  | 1109 | 1.02488E-05 |
| Chr2 | 6073346 | 6074909 | 4  | 1564 | 4.39349E-06 |
| Chr2 | 6080660 | 6081826 | 4  | 1167 | 2.65393E-06 |
| Chr2 | 6114228 | 6115270 | 4  | 1043 | 6.53548E-06 |
| Chr2 | 6116273 | 6119541 | 8  | 3269 | 8.93E-12    |
| Chr2 | 6122047 | 6123262 | 5  | 1216 | 6.16E-07    |
| Chr2 | 6231953 | 6234493 | 6  | 2541 | 1.09E-09    |
| Chr2 | 6259140 | 6261606 | 6  | 2467 | 7.30E-08    |
| Chr2 | 6264164 | 6264789 | 6  | 626  | 3.68113E-07 |
| Chr2 | 6266095 | 6267228 | 5  | 1134 | 8.79822E-07 |
| Chr2 | 6330569 | 6332062 | 4  | 1494 | 3.55E-10    |
| Chr2 | 6341537 | 6342894 | 6  | 1358 | 2.49E-12    |
| Chr2 | 6424355 | 6425847 | 4  | 1493 | 1.24841E-06 |
| Chr2 | 6433565 | 6435818 | 7  | 2254 | 3.64E-10    |
| Chr2 | 6458749 | 6461664 | 10 | 2916 | 1.59E-14    |
| Chr2 | 6479653 | 6480509 | 4  | 857  | 0.00031433  |
| Chr2 | 6510264 | 6510459 | 4  | 196  | 4.71335E-06 |
| Chr2 | 6552470 | 6554243 | 7  | 1774 | 5.50E-07    |
| Chr2 | 6606854 | 6607877 | 4  | 1024 | 7.23E-09    |
| Chr2 | 6619598 | 6620444 | 6  | 847  | 3.64E-09    |
| Chr2 | 6622089 | 6623041 | 4  | 953  | 6.65656E-06 |
| Chr2 | 6701826 | 6703452 | 9  | 1627 | 2.06E-12    |
| Chr2 | 6717665 | 6721771 | 13 | 4107 | 9.17E-18    |
| Chr2 | 6727430 | 6729042 | 6  | 1613 | 1.61E-09    |
| Chr2 | 6767466 | 6768689 | 4  | 1224 | 9.27452E-06 |
| Chr2 | 6769772 | 6771806 | 6  | 2035 | 4.40E-09    |
| Chr2 | 6837577 | 6838084 | 7  | 508  | 1.09E-09    |
| Chr2 | 6841862 | 6843804 | 9  | 1943 | 9.19E-16    |
| Chr2 | 6845187 | 6847381 | 6  | 2195 | 4.69E-10    |
| Chr2 | 6881967 | 6882936 | 4  | 970  | 0.000820213 |

|      |          |          |    |      |             |
|------|----------|----------|----|------|-------------|
| Chr2 | 6911452  | 6912290  | 4  | 839  | 2.24939E-05 |
| Chr2 | 6953418  | 6955294  | 6  | 1877 | 1.06E-08    |
| Chr2 | 6957152  | 6958403  | 4  | 1252 | 0.000988117 |
| Chr2 | 6974501  | 6976413  | 5  | 1913 | 1.23E-07    |
| Chr2 | 7005315  | 7006296  | 4  | 982  | 2.93E-07    |
| Chr2 | 7008879  | 7010049  | 5  | 1171 | 1.22643E-06 |
| Chr2 | 7011588  | 7012361  | 4  | 774  | 3.35182E-05 |
| Chr2 | 7015630  | 7016701  | 6  | 1072 | 5.59E-09    |
| Chr2 | 7173312  | 7175451  | 4  | 2140 | 4.80657E-06 |
| Chr2 | 7190949  | 7192163  | 30 | 1215 | 8.87E-39    |
| Chr2 | 7211593  | 7213545  | 4  | 1953 | 2.72631E-06 |
| Chr2 | 7230514  | 7233052  | 10 | 2539 | 1.31E-14    |
| Chr2 | 7235813  | 7236983  | 5  | 1171 | 2.68098E-06 |
| Chr2 | 7581441  | 7583636  | 5  | 2196 | 5.08E-08    |
| Chr2 | 7720792  | 7721517  | 4  | 726  | 2.22505E-07 |
| Chr2 | 7779993  | 7781934  | 6  | 1942 | 1.47046E-06 |
| Chr2 | 8061358  | 8061438  | 5  | 81   | 3.15E-09    |
| Chr2 | 8076297  | 8077520  | 5  | 1224 | 2.89871E-06 |
| Chr2 | 8199899  | 8200218  | 9  | 320  | 1.21E-14    |
| Chr2 | 8271461  | 8272600  | 4  | 1140 | 3.39638E-05 |
| Chr2 | 8555231  | 8555811  | 7  | 581  | 1.20E-12    |
| Chr2 | 8562270  | 8563871  | 10 | 1602 | 8.42E-14    |
| Chr2 | 8565555  | 8566886  | 7  | 1332 | 4.11E-07    |
| Chr2 | 8816720  | 8819944  | 10 | 3225 | 4.26E-12    |
| Chr2 | 8911389  | 8911416  | 6  | 28   | 5.09E-10    |
| Chr2 | 9122097  | 9125094  | 8  | 2998 | 4.25E-11    |
| Chr2 | 9189506  | 9190854  | 5  | 1349 | 1.12467E-06 |
| Chr2 | 9654249  | 9654854  | 4  | 606  | 0.000747162 |
| Chr2 | 10408325 | 10408950 | 4  | 626  | 2.10025E-05 |
| Chr2 | 10435219 | 10437245 | 8  | 2027 | 1.14E-12    |
| Chr2 | 10593209 | 10593926 | 4  | 718  | 8.37636E-06 |
| Chr2 | 10595266 | 10596328 | 7  | 1063 | 1.46E-10    |
| Chr2 | 10606726 | 10608954 | 8  | 2229 | 4.88E-09    |
| Chr2 | 10874917 | 10878671 | 9  | 3755 | 2.34E-08    |
| Chr2 | 12449413 | 12450838 | 5  | 1426 | 1.29396E-06 |
| Chr2 | 12657121 | 12658304 | 4  | 1184 | 0.000788224 |
| Chr2 | 13223293 | 13225978 | 11 | 2686 | 8.04E-13    |
| Chr2 | 13421969 | 13424352 | 8  | 2384 | 4.51E-13    |
| Chr2 | 14404548 | 14405775 | 4  | 1228 | 4.45503E-06 |
| Chr2 | 14410530 | 14412242 | 4  | 1713 | 1.47E-07    |
| Chr2 | 14472547 | 14473085 | 5  | 539  | 7.25E-07    |
| Chr2 | 16008587 | 16009307 | 4  | 721  | 1.37E-07    |
| Chr2 | 17338114 | 17338342 | 4  | 229  | 6.88E-08    |
| Chr2 | 17339450 | 17341137 | 11 | 1688 | 6.37E-12    |
| Chr2 | 18398801 | 18398832 | 8  | 32   | 2.95E-14    |
| Chr2 | 18651523 | 18652291 | 5  | 769  | 2.09E-07    |
| Chr2 | 19320214 | 19320769 | 8  | 556  | 3.32E-14    |
| Chr3 | 381814   | 383044   | 5  | 1231 | 2.86E-13    |
| Chr3 | 1560027  | 1560546  | 9  | 520  | 4.35E-13    |
| Chr3 | 1963577  | 1964029  | 5  | 453  | 1.15E-08    |
| Chr3 | 1966566  | 1967848  | 4  | 1283 | 2.802E-06   |
| Chr3 | 2720862  | 2721867  | 4  | 1006 | 0.000141384 |
| Chr3 | 2808974  | 2809966  | 4  | 993  | 4.00E-08    |
| Chr3 | 2814009  | 2814946  | 4  | 938  | 2.80107E-06 |
| Chr3 | 3807086  | 3808197  | 6  | 1112 | 1.36E-08    |
| Chr3 | 3809514  | 3810332  | 4  | 819  | 2.18351E-05 |
| Chr3 | 4928288  | 4929257  | 6  | 970  | 1.45E-08    |
| Chr3 | 4948628  | 4950224  | 5  | 1597 | 3.64E-07    |
| Chr3 | 5279033  | 5281803  | 10 | 2771 | 6.94E-11    |
| Chr3 | 5283973  | 5286574  | 11 | 2602 | 7.86E-11    |
| Chr3 | 7708789  | 7708831  | 5  | 43   | 2.85E-10    |
| Chr3 | 7805841  | 7807074  | 4  | 1234 | 4.61E-07    |
| Chr3 | 8101281  | 8101613  | 4  | 333  | 1.13E-07    |

|      |          |          |    |      |             |
|------|----------|----------|----|------|-------------|
| Chr3 | 8411145  | 8411775  | 4  | 631  | 1.8853E-05  |
| Chr3 | 8541030  | 8542691  | 5  | 1662 | 6.47E-07    |
| Chr3 | 8846084  | 8847657  | 4  | 1574 | 1.04E-07    |
| Chr3 | 8977348  | 8977997  | 5  | 650  | 2.21E-09    |
| Chr3 | 9012012  | 9014407  | 7  | 2396 | 1.48E-11    |
| Chr3 | 9226796  | 9227685  | 6  | 890  | 1.43E-11    |
| Chr3 | 9230264  | 9231807  | 4  | 1544 | 8.40607E-06 |
| Chr3 | 9379227  | 9381420  | 7  | 2194 | 1.64E-13    |
| Chr3 | 9389168  | 9389537  | 6  | 370  | 5.47E-08    |
| Chr3 | 9391240  | 9392505  | 4  | 1266 | 2.22119E-06 |
| Chr3 | 9615681  | 9616602  | 7  | 922  | 9.83E-10    |
| Chr3 | 9664863  | 9665185  | 4  | 323  | 3.24473E-06 |
| Chr3 | 9692341  | 9696983  | 12 | 4643 | 8.12E-16    |
| Chr3 | 10222707 | 10223909 | 4  | 1203 | 3.59667E-06 |
| Chr3 | 10340862 | 10343747 | 12 | 2886 | 2.50E-16    |
| Chr3 | 10478619 | 10480152 | 8  | 1534 | 4.25E-09    |
| Chr3 | 10481253 | 10483338 | 7  | 2086 | 3.29E-08    |
| Chr3 | 10530876 | 10531486 | 4  | 611  | 7.76109E-06 |
| Chr3 | 10847632 | 10847655 | 4  | 24   | 1.65E-07    |
| Chr3 | 10919405 | 10921079 | 7  | 1675 | 3.56E-10    |
| Chr3 | 10927780 | 10929461 | 8  | 1682 | 1.32E-10    |
| Chr3 | 10932031 | 10932839 | 4  | 809  | 2.34E-07    |
| Chr3 | 11117938 | 11120531 | 8  | 2594 | 4.83E-12    |
| Chr3 | 11142675 | 11144011 | 7  | 1337 | 1.48E-09    |
| Chr3 | 11330331 | 11333119 | 12 | 2789 | 1.72E-12    |
| Chr3 | 11334966 | 11335491 | 4  | 526  | 1.71103E-06 |
| Chr3 | 11338913 | 11341304 | 5  | 2392 | 1.62E-08    |
| Chr3 | 11349058 | 11350824 | 7  | 1767 | 5.25E-10    |
| Chr3 | 11355624 | 11356704 | 6  | 1081 | 1.23247E-07 |
| Chr3 | 11393280 | 11393657 | 4  | 378  | 5.46401E-05 |
| Chr3 | 11407689 | 11409164 | 9  | 1476 | 2.04E-12    |
| Chr3 | 11421914 | 11422151 | 4  | 238  | 3.16E-07    |
| Chr3 | 11491566 | 11493616 | 6  | 2051 | 7.63E-08    |
| Chr3 | 11567615 | 11568195 | 4  | 581  | 9.90E-07    |
| Chr3 | 11569475 | 11570888 | 4  | 1414 | 0.031601117 |
| Chr3 | 11575269 | 11577671 | 6  | 2403 | 1.37687E-06 |
| Chr3 | 11635147 | 11638389 | 13 | 3243 | 9.02E-15    |
| Chr3 | 11657136 | 11658402 | 6  | 1267 | 1.68684E-06 |
| Chr3 | 11660307 | 11660422 | 4  | 116  | 1.92468E-06 |
| Chr3 | 11666305 | 11666941 | 4  | 637  | 3.98372E-05 |
| Chr3 | 11680394 | 11681537 | 6  | 1144 | 9.56E-08    |
| Chr3 | 11688073 | 11688645 | 4  | 573  | 2.93778E-06 |
| Chr3 | 11862374 | 11862786 | 4  | 413  | 1.94879E-06 |
| Chr3 | 11870746 | 11872910 | 8  | 2165 | 8.90E-09    |
| Chr3 | 11874932 | 11876592 | 4  | 1661 | 0.001856367 |
| Chr3 | 11883910 | 11884893 | 4  | 984  | 1.93E-07    |
| Chr3 | 11933145 | 11935443 | 4  | 2299 | 1.44595E-06 |
| Chr3 | 11936468 | 11937877 | 4  | 1410 | 1.57484E-05 |
| Chr3 | 11940264 | 11940702 | 5  | 439  | 1.78E-10    |
| Chr3 | 11942961 | 11943684 | 6  | 724  | 9.93E-09    |
| Chr3 | 12002811 | 12003220 | 5  | 410  | 7.91E-08    |
| Chr3 | 12022015 | 12023977 | 7  | 1963 | 3.18E-11    |
| Chr3 | 12025376 | 12026976 | 4  | 1601 | 4.13184E-05 |
| Chr3 | 12033323 | 12034772 | 8  | 1450 | 7.67E-13    |
| Chr3 | 12037282 | 12041910 | 17 | 4629 | 1.07E-23    |
| Chr3 | 12044488 | 12045325 | 5  | 838  | 1.75923E-06 |
| Chr3 | 12046740 | 12048842 | 4  | 2103 | 2.53212E-06 |
| Chr3 | 12051918 | 12052602 | 6  | 685  | 1.27938E-06 |
| Chr3 | 12058916 | 12059750 | 7  | 835  | 6.41E-08    |
| Chr3 | 12067209 | 12067325 | 4  | 117  | 1.40725E-06 |
| Chr3 | 12069155 | 12070155 | 4  | 1001 | 2.29E-10    |
| Chr3 | 12106117 | 12106938 | 4  | 822  | 0.00037679  |
| Chr3 | 12155858 | 12157034 | 5  | 1177 | 1.61215E-05 |

|      |          |          |    |      |             |
|------|----------|----------|----|------|-------------|
| Chr3 | 12173420 | 12175538 | 4  | 2119 | 1.80162E-06 |
| Chr3 | 12187471 | 12187821 | 7  | 351  | 5.10E-12    |
| Chr3 | 12190180 | 12193162 | 8  | 2983 | 3.66E-10    |
| Chr3 | 12196230 | 12197476 | 5  | 1247 | 2.90E-08    |
| Chr3 | 12198548 | 12200436 | 4  | 1889 | 2.02601E-06 |
| Chr3 | 12202044 | 12204151 | 8  | 2108 | 2.60E-10    |
| Chr3 | 12205213 | 12206207 | 6  | 995  | 4.72E-08    |
| Chr3 | 12211121 | 12211784 | 5  | 664  | 2.02E-07    |
| Chr3 | 12215971 | 12217153 | 7  | 1183 | 1.64E-09    |
| Chr3 | 12219013 | 12222721 | 9  | 3709 | 3.52E-11    |
| Chr3 | 12250322 | 12253227 | 8  | 2906 | 1.85E-12    |
| Chr3 | 12254243 | 12254880 | 5  | 638  | 8.72E-07    |
| Chr3 | 12283493 | 12285581 | 6  | 2089 | 9.20E-10    |
| Chr3 | 12290490 | 12293758 | 8  | 3269 | 9.13E-09    |
| Chr3 | 12319314 | 12321320 | 7  | 2007 | 1.18E-10    |
| Chr3 | 12322617 | 12325951 | 6  | 3335 | 1.05E-09    |
| Chr3 | 12345921 | 12347894 | 5  | 1974 | 7.29017E-06 |
| Chr3 | 12373594 | 12374182 | 4  | 589  | 2.64E-07    |
| Chr3 | 12377515 | 12378444 | 5  | 930  | 2.95867E-05 |
| Chr3 | 12396134 | 12397688 | 5  | 1555 | 8.99661E-07 |
| Chr3 | 12402213 | 12403435 | 6  | 1223 | 5.86E-11    |
| Chr3 | 12405594 | 12411799 | 15 | 6206 | 1.91E-18    |
| Chr3 | 12427091 | 12428663 | 5  | 1573 | 2.58E-10    |
| Chr3 | 12434253 | 12435528 | 4  | 1276 | 1.84232E-06 |
| Chr3 | 12437314 | 12437779 | 4  | 466  | 7.95E-07    |
| Chr3 | 12441206 | 12442646 | 6  | 1441 | 2.68E-08    |
| Chr3 | 12462934 | 12465632 | 6  | 2699 | 6.23348E-05 |
| Chr3 | 12469039 | 12470592 | 4  | 1554 | 1.97E-08    |
| Chr3 | 12473706 | 12473766 | 5  | 61   | 2.63E-08    |
| Chr3 | 12475562 | 12478637 | 10 | 3076 | 1.90E-12    |
| Chr3 | 12482947 | 12484173 | 5  | 1227 | 2.45784E-05 |
| Chr3 | 12489707 | 12490384 | 4  | 678  | 0.003480453 |
| Chr3 | 12492082 | 12492962 | 4  | 881  | 1.16269E-06 |
| Chr3 | 12496449 | 12498941 | 10 | 2493 | 1.68E-11    |
| Chr3 | 12502240 | 12503337 | 5  | 1098 | 7.27E-08    |
| Chr3 | 12510632 | 12512035 | 4  | 1404 | 1.33144E-06 |
| Chr3 | 12515128 | 12517324 | 4  | 2197 | 0.000112421 |
| Chr3 | 12521682 | 12523100 | 5  | 1419 | 2.52785E-05 |
| Chr3 | 12532665 | 12534569 | 4  | 1905 | 1.60E-08    |
| Chr3 | 12539196 | 12541395 | 13 | 2200 | 1.77E-21    |
| Chr3 | 12546229 | 12546958 | 4  | 730  | 0.000428626 |
| Chr3 | 12548023 | 12549139 | 5  | 1117 | 3.80377E-06 |
| Chr3 | 12552111 | 12553580 | 6  | 1470 | 5.05E-08    |
| Chr3 | 12564237 | 12564589 | 4  | 353  | 9.19085E-06 |
| Chr3 | 12565691 | 12565935 | 4  | 245  | 7.85355E-06 |
| Chr3 | 12576012 | 12578244 | 5  | 2233 | 6.44363E-05 |
| Chr3 | 12582551 | 12584035 | 5  | 1485 | 1.05E-07    |
| Chr3 | 12585974 | 12588775 | 8  | 2802 | 6.19E-07    |
| Chr3 | 12616234 | 12618553 | 5  | 2320 | 1.10E-08    |
| Chr3 | 12634754 | 12636487 | 5  | 1734 | 1.10E-10    |
| Chr3 | 12675408 | 12677586 | 5  | 2179 | 8.72E-08    |
| Chr3 | 12686572 | 12688089 | 5  | 1518 | 0.000107341 |
| Chr3 | 12698509 | 12699271 | 5  | 763  | 1.82879E-05 |
| Chr3 | 12706273 | 12707463 | 8  | 1191 | 5.34E-10    |
| Chr3 | 12710549 | 12712182 | 5  | 1634 | 4.78E-07    |
| Chr3 | 12715874 | 12718516 | 4  | 2643 | 7.11321E-06 |
| Chr3 | 12722629 | 12724545 | 7  | 1917 | 8.07E-12    |
| Chr3 | 12747115 | 12748893 | 6  | 1779 | 1.03748E-06 |
| Chr3 | 12750367 | 12751576 | 7  | 1210 | 3.68E-09    |
| Chr3 | 12800438 | 12804253 | 7  | 3816 | 2.30E-11    |
| Chr3 | 12819552 | 12821523 | 9  | 1972 | 6.32E-12    |
| Chr3 | 12827391 | 12830870 | 10 | 3480 | 5.53E-12    |
| Chr3 | 12853812 | 12855749 | 4  | 1938 | 4.30269E-06 |



|      |          |          |     |      |             |
|------|----------|----------|-----|------|-------------|
| Chr3 | 12856803 | 12857538 | 6   | 736  | 2.03E-14    |
| Chr3 | 12858576 | 12859994 | 5   | 1419 | 4.78E-07    |
| Chr3 | 12862268 | 12863731 | 5   | 1464 | 2.67E-08    |
| Chr3 | 12931875 | 12933608 | 6   | 1734 | 4.12E-08    |
| Chr3 | 12935100 | 12935848 | 4   | 749  | 7.26E-07    |
| Chr3 | 12944166 | 12947929 | 14  | 3764 | 2.77E-17    |
| Chr3 | 12962454 | 12966165 | 13  | 3712 | 2.79E-15    |
| Chr3 | 12972723 | 12973215 | 4   | 493  | 2.78E-07    |
| Chr3 | 12983389 | 12985004 | 9   | 1616 | 2.03E-13    |
| Chr3 | 13015878 | 13017889 | 6   | 2012 | 5.55E-09    |
| Chr3 | 13055884 | 13057499 | 4   | 1616 | 4.25E-07    |
| Chr3 | 13086774 | 13091077 | 13  | 4304 | 3.09E-16    |
| Chr3 | 13119365 | 13120136 | 6   | 772  | 8.97E-07    |
| Chr3 | 13123366 | 13124015 | 8   | 650  | 1.45E-12    |
| Chr3 | 13144323 | 13144593 | 4   | 271  | 2.56E-07    |
| Chr3 | 13150999 | 13152067 | 4   | 1069 | 1.84016E-06 |
| Chr3 | 13157820 | 13160993 | 8   | 3174 | 3.95E-08    |
| Chr3 | 13162236 | 13163410 | 4   | 1175 | 9.69E-07    |
| Chr3 | 13190076 | 13190852 | 10  | 777  | 1.66E-11    |
| Chr3 | 13191989 | 13192762 | 5   | 774  | 3.46E-07    |
| Chr3 | 13200178 | 13200464 | 4   | 287  | 8.17E-07    |
| Chr3 | 13203597 | 13206198 | 10  | 2602 | 3.49E-13    |
| Chr3 | 13239925 | 13242121 | 8   | 2197 | 6.04E-09    |
| Chr3 | 13248937 | 13250133 | 6   | 1197 | 4.17E-10    |
| Chr3 | 13254544 | 13256219 | 4   | 1676 | 2.63107E-05 |
| Chr3 | 13276336 | 13277893 | 6   | 1558 | 3.20E-09    |
| Chr3 | 13322227 | 13323204 | 4   | 978  | 1.77811E-06 |
| Chr3 | 13341857 | 13342668 | 4   | 812  | 2.83E-07    |
| Chr3 | 13355582 | 13357656 | 6   | 2075 | 1.22E-07    |
| Chr3 | 13365577 | 13367802 | 7   | 2226 | 6.45E-10    |
| Chr3 | 13380731 | 13382856 | 5   | 2126 | 6.65E-08    |
| Chr3 | 13385262 | 13386919 | 4   | 1658 | 7.97274E-06 |
| Chr3 | 13401252 | 13404354 | 7   | 3103 | 2.42E-09    |
| Chr3 | 13407229 | 13411598 | 17  | 4370 | 1.88E-24    |
| Chr3 | 13418225 | 13421729 | 10  | 3505 | 1.19E-14    |
| Chr3 | 13436757 | 13437535 | 5   | 779  | 7.58E-07    |
| Chr3 | 13441239 | 13441633 | 5   | 395  | 1.85E-08    |
| Chr3 | 13444161 | 13444647 | 4   | 487  | 3.39622E-06 |
| Chr3 | 13456485 | 13457661 | 4   | 1177 | 3.7051E-05  |
| Chr3 | 13477403 | 13479216 | 5   | 1814 | 3.97E-08    |
| Chr3 | 13514215 | 13519527 | 12  | 5313 | 7.38E-18    |
| Chr3 | 13520540 | 13521915 | 4   | 1376 | 2.41536E-06 |
| Chr3 | 13545389 | 13548003 | 6   | 2615 | 1.29E-09    |
| Chr3 | 13555639 | 13556772 | 4   | 1134 | 0.000119524 |
| Chr3 | 13563953 | 13564668 | 4   | 716  | 1.12057E-06 |
| Chr3 | 13576194 | 13576981 | 5   | 788  | 1.11E-07    |
| Chr3 | 13585742 | 13587760 | 51  | 2019 | 4.83E-80    |
| Chr3 | 13588842 | 13592561 | 391 | 3720 | 0           |
| Chr3 | 13594128 | 13596341 | 6   | 2214 | 4.61E-08    |
| Chr3 | 13602820 | 13604238 | 6   | 1419 | 4.08E-08    |
| Chr3 | 13608517 | 13613253 | 14  | 4737 | 8.03E-13    |
| Chr3 | 13615340 | 13616385 | 5   | 1046 | 3.95E-10    |
| Chr3 | 13617496 | 13619129 | 4   | 1634 | 1.32419E-06 |
| Chr3 | 13620870 | 13622987 | 9   | 2118 | 1.42E-13    |
| Chr3 | 13625550 | 13626130 | 4   | 581  | 7.30E-07    |
| Chr3 | 13628898 | 13630057 | 4   | 1160 | 1.70E-08    |
| Chr3 | 13633523 | 13633664 | 5   | 142  | 3.59E-07    |
| Chr3 | 13636301 | 13641396 | 14  | 5096 | 1.20E-16    |
| Chr3 | 13642643 | 13644759 | 8   | 2117 | 5.44E-12    |
| Chr3 | 13649619 | 13651732 | 7   | 2114 | 1.58E-08    |
| Chr3 | 13653974 | 13657052 | 14  | 3079 | 5.39E-16    |
| Chr3 | 13671729 | 13673268 | 7   | 1540 | 1.26E-07    |
| Chr3 | 13675625 | 13676208 | 4   | 584  | 3.33825E-05 |

|      |          |          |     |      |             |
|------|----------|----------|-----|------|-------------|
| Chr3 | 13678336 | 13678539 | 5   | 204  | 9.68E-11    |
| Chr3 | 13682793 | 13682946 | 4   | 154  | 0.007521476 |
| Chr3 | 13707164 | 13707654 | 5   | 491  | 5.25E-08    |
| Chr3 | 13709824 | 13711098 | 5   | 1275 | 0.000450167 |
| Chr3 | 13712276 | 13712429 | 4   | 154  | 1.57E-07    |
| Chr3 | 13771490 | 13771816 | 4   | 327  | 3.35399E-06 |
| Chr3 | 13777651 | 13778958 | 4   | 1308 | 6.31185E-06 |
| Chr3 | 13801937 | 13805613 | 12  | 3677 | 1.04E-17    |
| Chr3 | 13809434 | 13809644 | 4   | 211  | 6.21814E-06 |
| Chr3 | 13813067 | 13816289 | 12  | 3223 | 2.79E-10    |
| Chr3 | 13819190 | 13820791 | 6   | 1602 | 3.84E-09    |
| Chr3 | 13829266 | 13829758 | 4   | 493  | 0.000173629 |
| Chr3 | 13838959 | 13839685 | 5   | 727  | 4.1564E-08  |
| Chr3 | 13853883 | 13854054 | 6   | 172  | 4.81E-08    |
| Chr3 | 13872986 | 13874190 | 4   | 1205 | 5.02119E-06 |
| Chr3 | 13875627 | 13876260 | 5   | 634  | 4.16E-07    |
| Chr3 | 13886703 | 13890146 | 17  | 3444 | 3.19E-24    |
| Chr3 | 13891150 | 13891847 | 5   | 698  | 1.02E-07    |
| Chr3 | 13904654 | 13905034 | 5   | 381  | 4.19E-07    |
| Chr3 | 13906075 | 13907948 | 6   | 1874 | 2.35E-09    |
| Chr3 | 13920979 | 13921747 | 8   | 769  | 6.58E-14    |
| Chr3 | 13925802 | 13930438 | 14  | 4637 | 1.48E-17    |
| Chr3 | 13944787 | 13945704 | 4   | 918  | 1.02541E-06 |
| Chr3 | 13948953 | 13950655 | 4   | 1703 | 1.86E-09    |
| Chr3 | 13952645 | 13954707 | 9   | 2063 | 9.76E-12    |
| Chr3 | 13956424 | 13959498 | 8   | 3075 | 1.55E-11    |
| Chr3 | 13967307 | 13968830 | 9   | 1524 | 3.13E-14    |
| Chr3 | 13970464 | 13973291 | 7   | 2828 | 1.02E-07    |
| Chr3 | 13978570 | 13979624 | 4   | 1055 | 6.54E-07    |
| Chr3 | 13993291 | 13993792 | 4   | 502  | 3.41131E-05 |
| Chr3 | 13997474 | 13999473 | 6   | 2000 | 6.82E-10    |
| Chr3 | 14011418 | 14014151 | 7   | 2734 | 2.44111E-06 |
| Chr3 | 14045120 | 14045611 | 4   | 492  | 3.43149E-06 |
| Chr3 | 14077499 | 14080496 | 11  | 2998 | 1.44E-15    |
| Chr3 | 14107297 | 14108151 | 4   | 855  | 0.000128475 |
| Chr3 | 14123949 | 14124655 | 4   | 707  | 6.85556E-06 |
| Chr3 | 14157098 | 14157283 | 5   | 186  | 2.59E-08    |
| Chr3 | 14164433 | 14166479 | 10  | 2047 | 7.83E-12    |
| Chr3 | 14168796 | 14171313 | 9   | 2518 | 2.28E-10    |
| Chr3 | 14172762 | 14172933 | 4   | 172  | 5.23767E-05 |
| Chr3 | 14180460 | 14181737 | 9   | 1278 | 3.21E-09    |
| Chr3 | 14185759 | 14186147 | 4   | 389  | 0.000143103 |
| Chr3 | 14190029 | 14190796 | 6   | 768  | 3.18849E-06 |
| Chr3 | 14195440 | 14204046 | 647 | 8607 | 0           |
| Chr3 | 14205335 | 14208552 | 50  | 3218 | 1.46E-39    |
| Chr3 | 14210218 | 14213723 | 19  | 3506 | 4.78E-13    |
| Chr3 | 14214864 | 14215933 | 9   | 1070 | 5.13E-11    |
| Chr3 | 14222483 | 14225129 | 16  | 2647 | 2.49E-19    |
| Chr3 | 14245304 | 14247826 | 7   | 2523 | 1.55E-11    |
| Chr3 | 14251246 | 14252236 | 4   | 991  | 0.000128228 |
| Chr3 | 14253600 | 14258113 | 12  | 4514 | 1.30E-13    |
| Chr3 | 14271489 | 14273891 | 5   | 2403 | 2.29E-07    |
| Chr3 | 14293110 | 14294338 | 4   | 1229 | 1.71202E-06 |
| Chr3 | 14341151 | 14343600 | 7   | 2450 | 2.71E-08    |
| Chr3 | 14345507 | 14346636 | 4   | 1130 | 1.49E-07    |
| Chr3 | 14375237 | 14376641 | 5   | 1405 | 2.58E-08    |
| Chr3 | 14388424 | 14389849 | 5   | 1426 | 4.61772E-07 |
| Chr3 | 14390909 | 14392918 | 6   | 2010 | 8.86E-09    |
| Chr3 | 14411234 | 14413015 | 6   | 1782 | 7.07E-08    |
| Chr3 | 14420903 | 14423962 | 9   | 3060 | 2.93E-11    |
| Chr3 | 14428409 | 14428977 | 5   | 569  | 1.21153E-05 |
| Chr3 | 14438988 | 14440629 | 5   | 1642 | 1.11E-08    |
| Chr3 | 14442521 | 14443690 | 5   | 1170 | 7.97E-08    |

|      |          |          |    |      |             |
|------|----------|----------|----|------|-------------|
| Chr3 | 14513058 | 14513905 | 4  | 848  | 6.38E-09    |
| Chr3 | 14543175 | 14545665 | 9  | 2491 | 7.83E-12    |
| Chr3 | 14546800 | 14548516 | 9  | 1717 | 3.29E-15    |
| Chr3 | 14549895 | 14550705 | 4  | 811  | 1.66257E-06 |
| Chr3 | 14554503 | 14558420 | 16 | 3918 | 6.70E-18    |
| Chr3 | 14565168 | 14570327 | 15 | 5160 | 9.39E-19    |
| Chr3 | 14582619 | 14583580 | 5  | 962  | 5.35E-09    |
| Chr3 | 14616356 | 14619452 | 10 | 3097 | 3.41E-10    |
| Chr3 | 14620530 | 14621767 | 7  | 1238 | 1.84E-10    |
| Chr3 | 14629700 | 14630506 | 4  | 807  | 8.72891E-06 |
| Chr3 | 14657360 | 14658750 | 7  | 1391 | 1.12E-09    |
| Chr3 | 14660152 | 14660365 | 4  | 214  | 1.96146E-06 |
| Chr3 | 14691112 | 14691887 | 5  | 776  | 2.46159E-06 |
| Chr3 | 14701858 | 14702812 | 5  | 955  | 1.04E-09    |
| Chr3 | 14706488 | 14706736 | 4  | 249  | 9.78E-07    |
| Chr3 | 14707770 | 14710741 | 7  | 2972 | 2.59E-08    |
| Chr3 | 14717056 | 14718951 | 8  | 1896 | 2.68E-10    |
| Chr3 | 14729221 | 14731901 | 8  | 2681 | 6.19E-09    |
| Chr3 | 14778572 | 14781152 | 8  | 2581 | 3.94E-13    |
| Chr3 | 14785660 | 14786897 | 4  | 1238 | 4.11105E-05 |
| Chr3 | 14795786 | 14797742 | 11 | 1957 | 1.39E-16    |
| Chr3 | 14805217 | 14809633 | 13 | 4417 | 5.04E-20    |
| Chr3 | 14821996 | 14823166 | 5  | 1171 | 4.55E-07    |
| Chr3 | 14838058 | 14839674 | 4  | 1617 | 3.21E-07    |
| Chr3 | 14848956 | 14849846 | 4  | 891  | 3.88E-08    |
| Chr3 | 14872053 | 14872948 | 4  | 896  | 3.83486E-06 |
| Chr3 | 14932374 | 14934859 | 5  | 2486 | 3.44E-08    |
| Chr3 | 14969897 | 14971129 | 5  | 1233 | 7.69E-07    |
| Chr3 | 15032015 | 15034405 | 8  | 2391 | 8.70E-09    |
| Chr3 | 15041680 | 15043336 | 6  | 1657 | 2.12E-07    |
| Chr3 | 15046583 | 15048085 | 4  | 1503 | 4.97E-07    |
| Chr3 | 15053942 | 15056035 | 7  | 2094 | 3.19E-08    |
| Chr3 | 15062456 | 15063998 | 5  | 1543 | 1.08E-07    |
| Chr3 | 15067749 | 15070375 | 8  | 2627 | 3.12E-09    |
| Chr3 | 15072517 | 15073787 | 6  | 1271 | 7.93E-07    |
| Chr3 | 15099668 | 15100072 | 5  | 405  | 8.20E-09    |
| Chr3 | 15106514 | 15108548 | 9  | 2035 | 2.91E-11    |
| Chr3 | 15113481 | 15114338 | 7  | 858  | 5.02E-10    |
| Chr3 | 15120745 | 15122756 | 8  | 2012 | 4.64E-09    |
| Chr3 | 15124291 | 15125230 | 5  | 940  | 6.85E-09    |
| Chr3 | 15138730 | 15141000 | 8  | 2271 | 9.04E-11    |
| Chr3 | 15144958 | 15145628 | 4  | 671  | 1.90E-08    |
| Chr3 | 15148601 | 15151868 | 6  | 3268 | 2.33E-07    |
| Chr3 | 15153588 | 15154025 | 4  | 438  | 2.19925E-05 |
| Chr3 | 15162054 | 15163739 | 4  | 1686 | 1.6775E-06  |
| Chr3 | 15246507 | 15248446 | 10 | 1940 | 4.06E-11    |
| Chr3 | 15252201 | 15254633 | 14 | 2433 | 6.26E-20    |
| Chr3 | 15255795 | 15257649 | 4  | 1855 | 1.94611E-06 |
| Chr3 | 15258799 | 15260407 | 4  | 1609 | 1.1917E-05  |
| Chr3 | 15262886 | 15263814 | 4  | 929  | 9.07498E-06 |
| Chr3 | 15266639 | 15267437 | 5  | 799  | 2.73482E-06 |
| Chr3 | 15298919 | 15300959 | 4  | 2041 | 3.68609E-06 |
| Chr3 | 15305330 | 15307573 | 6  | 2244 | 1.17E-07    |
| Chr3 | 15324363 | 15326269 | 5  | 1907 | 6.70E-07    |
| Chr3 | 15328423 | 15329009 | 6  | 587  | 4.22E-08    |
| Chr3 | 15330054 | 15331274 | 4  | 1221 | 2.94825E-06 |
| Chr3 | 15360475 | 15362145 | 5  | 1671 | 6.08E-07    |
| Chr3 | 15374716 | 15377939 | 12 | 3224 | 9.78E-17    |
| Chr3 | 15382556 | 15384381 | 5  | 1826 | 9.49017E-07 |
| Chr3 | 15388641 | 15390615 | 5  | 1975 | 7.67662E-06 |
| Chr3 | 15415519 | 15417019 | 5  | 1501 | 1.46789E-06 |
| Chr3 | 15420627 | 15421394 | 4  | 768  | 2.2076E-06  |
| Chr3 | 15458987 | 15464407 | 19 | 5421 | 2.69E-26    |

|      |          |          |    |      |             |
|------|----------|----------|----|------|-------------|
| Chr3 | 15531853 | 15534045 | 6  | 2193 | 9.60E-10    |
| Chr3 | 15537404 | 15539068 | 4  | 1665 | 1.15331E-05 |
| Chr3 | 15543184 | 15545575 | 5  | 2392 | 2.16E-08    |
| Chr3 | 15546798 | 15548475 | 10 | 1678 | 8.23E-14    |
| Chr3 | 15578323 | 15579563 | 5  | 1241 | 6.02E-08    |
| Chr3 | 15581001 | 15585781 | 14 | 4781 | 9.33E-20    |
| Chr3 | 15587113 | 15589039 | 6  | 1927 | 1.34E-07    |
| Chr3 | 15590549 | 15591815 | 6  | 1267 | 1.29081E-05 |
| Chr3 | 15595665 | 15597052 | 5  | 1388 | 4.26E-07    |
| Chr3 | 15631152 | 15631871 | 4  | 720  | 1.76969E-05 |
| Chr3 | 15691393 | 15692596 | 6  | 1204 | 2.26859E-07 |
| Chr3 | 15712429 | 15713851 | 5  | 1423 | 1.30E-10    |
| Chr3 | 15714905 | 15716909 | 11 | 2005 | 1.08E-13    |
| Chr3 | 15719977 | 15721919 | 7  | 1943 | 9.69E-10    |
| Chr3 | 15851331 | 15852258 | 4  | 928  | 1.43E-08    |
| Chr3 | 15918949 | 15919773 | 4  | 825  | 3.23E-08    |
| Chr3 | 16178320 | 16180394 | 6  | 2075 | 1.30E-10    |
| Chr3 | 16331032 | 16332134 | 4  | 1103 | 1.41573E-06 |
| Chr3 | 16337039 | 16339878 | 6  | 2840 | 7.11E-07    |
| Chr3 | 16499753 | 16501220 | 4  | 1468 | 3.86789E-06 |
| Chr3 | 16590350 | 16592886 | 10 | 2537 | 7.18E-13    |
| Chr3 | 16601892 | 16603161 | 4  | 1270 | 1.02274E-06 |
| Chr3 | 16669941 | 16670316 | 4  | 376  | 1.84691E-06 |
| Chr3 | 16693707 | 16697892 | 11 | 4186 | 4.72E-11    |
| Chr3 | 16812010 | 16813266 | 7  | 1257 | 3.84E-09    |
| Chr3 | 16961484 | 16962341 | 4  | 858  | 5.13E-07    |
| Chr3 | 17099932 | 17100945 | 4  | 1014 | 1.64069E-05 |
| Chr3 | 17112798 | 17112998 | 4  | 201  | 1.77771E-05 |
| Chr3 | 17117416 | 17117425 | 4  | 10   | 6.51E-10    |
| Chr3 | 17394004 | 17394776 | 4  | 773  | 2.72E-09    |
| Chr3 | 17404773 | 17406012 | 5  | 1240 | 1.36268E-06 |
| Chr3 | 17978597 | 17983189 | 16 | 4593 | 2.90E-22    |
| Chr3 | 18062394 | 18063074 | 4  | 681  | 4.53276E-06 |
| Chr3 | 18791300 | 18792344 | 6  | 1045 | 7.70E-12    |
| Chr3 | 18794012 | 18795748 | 12 | 1737 | 5.90E-13    |
| Chr3 | 18885825 | 18886783 | 5  | 959  | 3.40E-10    |
| Chr3 | 20202207 | 20203486 | 6  | 1280 | 1.19E-08    |
| Chr3 | 20233785 | 20234795 | 7  | 1011 | 1.27E-09    |
| Chr3 | 20306009 | 20308188 | 9  | 2180 | 1.11E-12    |
| Chr3 | 20726305 | 20728354 | 12 | 2050 | 2.77E-16    |
| Chr3 | 21326230 | 21326753 | 4  | 524  | 4.68553E-06 |
| Chr3 | 22233376 | 22234436 | 4  | 1061 | 0.000569034 |
| Chr3 | 22696225 | 22697528 | 5  | 1304 | 1.55774E-05 |
| Chr3 | 23108943 | 23111991 | 12 | 3049 | 6.17E-17    |
| Chr3 | 23115061 | 23115755 | 4  | 695  | 1.15113E-06 |
| Chr4 | 49442    | 52862    | 10 | 3421 | 5.21E-16    |
| Chr4 | 631745   | 634317   | 10 | 2573 | 1.59E-11    |
| Chr4 | 725645   | 725681   | 8  | 37   | 2.06E-13    |
| Chr4 | 862997   | 864578   | 6  | 1582 | 1.52E-08    |
| Chr4 | 1063647  | 1064040  | 5  | 394  | 1.47E-08    |
| Chr4 | 1313173  | 1315184  | 8  | 2012 | 1.83E-08    |
| Chr4 | 1453309  | 1454985  | 4  | 1677 | 2.13395E-05 |
| Chr4 | 1487137  | 1488595  | 5  | 1459 | 3.24E-08    |
| Chr4 | 1565753  | 1566483  | 4  | 731  | 2.30E-08    |
| Chr4 | 1618775  | 1620169  | 4  | 1395 | 0.009405277 |
| Chr4 | 1623841  | 1624901  | 5  | 1061 | 3.65E-09    |
| Chr4 | 1650869  | 1651613  | 4  | 745  | 1.78197E-06 |
| Chr4 | 1667015  | 1669191  | 6  | 2177 | 1.18851E-05 |
| Chr4 | 1674166  | 1676430  | 8  | 2265 | 7.84E-10    |
| Chr4 | 1683932  | 1685444  | 6  | 1513 | 1.64E-08    |
| Chr4 | 1690166  | 1690521  | 4  | 356  | 1.08856E-06 |
| Chr4 | 1692898  | 1698582  | 17 | 5685 | 1.32E-14    |
| Chr4 | 1752322  | 1753553  | 4  | 1232 | 1.03037E-05 |

|      |         |         |    |      |             |
|------|---------|---------|----|------|-------------|
| Chr4 | 1787907 | 1790185 | 9  | 2279 | 6.91E-12    |
| Chr4 | 1791497 | 1792418 | 4  | 922  | 5.89309E-07 |
| Chr4 | 1793799 | 1795120 | 6  | 1322 | 3.75E-07    |
| Chr4 | 1798528 | 1801552 | 9  | 3025 | 6.71E-11    |
| Chr4 | 1807830 | 1811417 | 10 | 3588 | 2.31E-15    |
| Chr4 | 1829254 | 1833683 | 14 | 4430 | 8.30E-18    |
| Chr4 | 1836603 | 1838225 | 4  | 1623 | 1.43E-08    |
| Chr4 | 1856051 | 1857770 | 7  | 1720 | 5.62E-08    |
| Chr4 | 1870878 | 1872421 | 4  | 1544 | 1.73139E-06 |
| Chr4 | 1905850 | 1908161 | 7  | 2312 | 1.99E-10    |
| Chr4 | 1921200 | 1922260 | 4  | 1061 | 0.000549895 |
| Chr4 | 1945524 | 1946495 | 4  | 972  | 3.85212E-06 |
| Chr4 | 1950306 | 1954960 | 12 | 4655 | 1.20E-15    |
| Chr4 | 1977555 | 1979066 | 6  | 1512 | 1.54483E-06 |
| Chr4 | 1988366 | 1990938 | 7  | 2573 | 9.81E-07    |
| Chr4 | 2003992 | 2005353 | 5  | 1362 | 1.29E-09    |
| Chr4 | 2006455 | 2007425 | 6  | 971  | 1.09E-09    |
| Chr4 | 2008546 | 2010426 | 4  | 1881 | 1.63487E-06 |
| Chr4 | 2048396 | 2049059 | 6  | 664  | 6.17E-08    |
| Chr4 | 2072815 | 2074275 | 6  | 1461 | 1.95E-09    |
| Chr4 | 2090875 | 2092469 | 4  | 1595 | 3.89E-07    |
| Chr4 | 2143168 | 2144641 | 4  | 1474 | 2.11E-07    |
| Chr4 | 2198404 | 2200350 | 5  | 1947 | 0.00058985  |
| Chr4 | 2212232 | 2214024 | 4  | 1793 | 1.50E-08    |
| Chr4 | 2247817 | 2249539 | 5  | 1723 | 1.22257E-05 |
| Chr4 | 2271002 | 2272488 | 5  | 1487 | 9.45E-07    |
| Chr4 | 2273591 | 2274903 | 4  | 1313 | 7.19E-07    |
| Chr4 | 2281950 | 2283011 | 5  | 1062 | 2.39471E-06 |
| Chr4 | 2284225 | 2285182 | 6  | 958  | 3.53E-07    |
| Chr4 | 2288054 | 2288799 | 7  | 746  | 3.47E-09    |
| Chr4 | 2305008 | 2307528 | 6  | 2521 | 8.91E-09    |
| Chr4 | 2597354 | 2602212 | 14 | 4859 | 1.13E-17    |
| Chr4 | 2644188 | 2648033 | 11 | 3846 | 4.02E-16    |
| Chr4 | 2701753 | 2702980 | 4  | 1228 | 1.28352E-05 |
| Chr4 | 2707170 | 2708569 | 5  | 1400 | 8.94E-07    |
| Chr4 | 2709968 | 2713019 | 9  | 3052 | 1.67E-12    |
| Chr4 | 2812056 | 2813695 | 8  | 1640 | 1.89E-09    |
| Chr4 | 2830698 | 2831973 | 4  | 1276 | 7.56E-07    |
| Chr4 | 2833134 | 2835033 | 8  | 1900 | 2.98E-12    |
| Chr4 | 2850622 | 2852055 | 5  | 1434 | 1.77E-09    |
| Chr4 | 2872085 | 2874632 | 7  | 2548 | 7.90E-09    |
| Chr4 | 2885719 | 2888604 | 8  | 2886 | 2.91E-13    |
| Chr4 | 2892681 | 2894100 | 5  | 1420 | 2.80E-07    |
| Chr4 | 2895785 | 2897695 | 6  | 1911 | 2.56479E-06 |
| Chr4 | 2902128 | 2902550 | 4  | 423  | 6.23469E-06 |
| Chr4 | 2911955 | 2916280 | 12 | 4326 | 3.09E-15    |
| Chr4 | 2921731 | 2921909 | 4  | 179  | 8.70E-08    |
| Chr4 | 2953593 | 2954102 | 4  | 510  | 8.76E-08    |
| Chr4 | 2968584 | 2970061 | 6  | 1478 | 5.32E-11    |
| Chr4 | 2973755 | 2976209 | 6  | 2455 | 2.70E-07    |
| Chr4 | 2977284 | 2980149 | 5  | 2866 | 3.70174E-06 |
| Chr4 | 2981632 | 2985483 | 9  | 3852 | 5.94E-11    |
| Chr4 | 3007076 | 3008024 | 5  | 949  | 4.50E-08    |
| Chr4 | 3009398 | 3013988 | 9  | 4591 | 1.04E-12    |
| Chr4 | 3015262 | 3017354 | 11 | 2093 | 8.00E-15    |
| Chr4 | 3019655 | 3020622 | 8  | 968  | 7.10E-11    |
| Chr4 | 3023235 | 3023866 | 4  | 632  | 3.52819E-05 |
| Chr4 | 3029268 | 3029667 | 5  | 400  | 1.64E-08    |
| Chr4 | 3031235 | 3031784 | 4  | 550  | 0.000109244 |
| Chr4 | 3039626 | 3040791 | 4  | 1166 | 7.14262E-06 |
| Chr4 | 3046032 | 3050310 | 13 | 4279 | 1.49E-12    |
| Chr4 | 3054405 | 3056714 | 30 | 2310 | 1.30E-13    |
| Chr4 | 3061193 | 3061530 | 6  | 338  | 2.00E-08    |

|      |         |         |    |      |             |
|------|---------|---------|----|------|-------------|
| Chr4 | 3068498 | 3070352 | 7  | 1855 | 8.63E-11    |
| Chr4 | 3071496 | 3073962 | 7  | 2467 | 3.04E-08    |
| Chr4 | 3076069 | 3078739 | 10 | 2671 | 7.70E-16    |
| Chr4 | 3080131 | 3082530 | 6  | 2400 | 6.31E-07    |
| Chr4 | 3091508 | 3094377 | 6  | 2870 | 2.44525E-06 |
| Chr4 | 3097939 | 3099095 | 4  | 1157 | 2.42795E-06 |
| Chr4 | 3100602 | 3101723 | 4  | 1122 | 4.55E-07    |
| Chr4 | 3106101 | 3106764 | 5  | 664  | 1.37E-07    |
| Chr4 | 3110140 | 3110844 | 5  | 705  | 6.25E-08    |
| Chr4 | 3127596 | 3131273 | 8  | 3678 | 7.94E-08    |
| Chr4 | 3136054 | 3138228 | 9  | 2175 | 1.34E-11    |
| Chr4 | 3139957 | 3140093 | 4  | 137  | 5.54E-07    |
| Chr4 | 3157209 | 3159362 | 4  | 2154 | 3.54964E-06 |
| Chr4 | 3180498 | 3184600 | 11 | 4103 | 1.37E-13    |
| Chr4 | 3186097 | 3186996 | 7  | 900  | 1.89E-08    |
| Chr4 | 3263358 | 3265783 | 8  | 2426 | 2.53E-10    |
| Chr4 | 3267773 | 3269189 | 4  | 1417 | 4.55E-07    |
| Chr4 | 3270403 | 3273247 | 9  | 2845 | 3.38E-10    |
| Chr4 | 3276605 | 3279487 | 10 | 2883 | 1.17E-09    |
| Chr4 | 3286520 | 3287367 | 5  | 848  | 1.83E-08    |
| Chr4 | 3288841 | 3290484 | 6  | 1644 | 1.06E-09    |
| Chr4 | 3304227 | 3305389 | 5  | 1163 | 3.92E-07    |
| Chr4 | 3313057 | 3313847 | 4  | 791  | 1.54256E-05 |
| Chr4 | 3317248 | 3318553 | 4  | 1306 | 1.47E-09    |
| Chr4 | 3321433 | 3322852 | 6  | 1420 | 1.98E-07    |
| Chr4 | 3339899 | 3341761 | 5  | 1863 | 1.09073E-06 |
| Chr4 | 3347784 | 3350422 | 5  | 2639 | 1.41E-08    |
| Chr4 | 3352644 | 3354119 | 4  | 1476 | 1.24E-08    |
| Chr4 | 3399859 | 3402706 | 8  | 2848 | 1.86E-09    |
| Chr4 | 3403848 | 3404994 | 4  | 1147 | 8.69185E-06 |
| Chr4 | 3432957 | 3434860 | 5  | 1904 | 6.91E-09    |
| Chr4 | 3456833 | 3457641 | 4  | 809  | 1.70E-07    |
| Chr4 | 3458707 | 3461716 | 7  | 3010 | 6.79E-10    |
| Chr4 | 3464160 | 3465459 | 6  | 1300 | 1.00E-09    |
| Chr4 | 3477407 | 3479064 | 4  | 1658 | 2.2518E-05  |
| Chr4 | 3486603 | 3489690 | 7  | 3088 | 1.84E-12    |
| Chr4 | 3490721 | 3493321 | 10 | 2601 | 7.31E-13    |
| Chr4 | 3494993 | 3497061 | 11 | 2069 | 7.04E-14    |
| Chr4 | 3499859 | 3502295 | 8  | 2437 | 5.97E-09    |
| Chr4 | 3504310 | 3506077 | 5  | 1768 | 2.94E-09    |
| Chr4 | 3540689 | 3543520 | 13 | 2832 | 1.82E-18    |
| Chr4 | 3544581 | 3548025 | 15 | 3445 | 1.73E-14    |
| Chr4 | 3550923 | 3552289 | 6  | 1367 | 2.37E-08    |
| Chr4 | 3556089 | 3558779 | 11 | 2691 | 1.27E-13    |
| Chr4 | 3567867 | 3569724 | 4  | 1858 | 6.32E-07    |
| Chr4 | 3573873 | 3575458 | 8  | 1586 | 2.91E-09    |
| Chr4 | 3584089 | 3588730 | 12 | 4642 | 1.30E-11    |
| Chr4 | 3591155 | 3593463 | 9  | 2309 | 9.69E-12    |
| Chr4 | 3595173 | 3597045 | 6  | 1873 | 6.47E-09    |
| Chr4 | 3603067 | 3606061 | 7  | 2995 | 6.11E-09    |
| Chr4 | 3618995 | 3620791 | 5  | 1797 | 1.14E-09    |
| Chr4 | 3624294 | 3625419 | 5  | 1126 | 1.81E-08    |
| Chr4 | 3628548 | 3632354 | 15 | 3807 | 3.74E-15    |
| Chr4 | 3676151 | 3679112 | 11 | 2962 | 1.36E-13    |
| Chr4 | 3680446 | 3682524 | 7  | 2079 | 1.14E-07    |
| Chr4 | 3683533 | 3685119 | 4  | 1587 | 3.47949E-06 |
| Chr4 | 3686628 | 3688089 | 5  | 1462 | 1.68E-07    |
| Chr4 | 3697180 | 3697977 | 6  | 798  | 3.50E-09    |
| Chr4 | 3706742 | 3707994 | 7  | 1253 | 5.66E-09    |
| Chr4 | 3716528 | 3718483 | 5  | 1956 | 1.46536E-05 |
| Chr4 | 3723343 | 3724599 | 4  | 1257 | 1.33664E-05 |
| Chr4 | 3728568 | 3729493 | 4  | 926  | 3.40E-07    |
| Chr4 | 3736257 | 3737094 | 7  | 838  | 5.12E-10    |

|      |         |         |     |      |             |
|------|---------|---------|-----|------|-------------|
| Chr4 | 3742535 | 3745386 | 8   | 2852 | 5.65E-11    |
| Chr4 | 3786425 | 3793354 | 23  | 6930 | 3.87E-29    |
| Chr4 | 3814816 | 3815970 | 4   | 1155 | 2.8125E-06  |
| Chr4 | 3820205 | 3821721 | 4   | 1517 | 3.0983E-06  |
| Chr4 | 3825391 | 3826188 | 4   | 798  | 5.43606E-06 |
| Chr4 | 3838832 | 3840751 | 6   | 1920 | 1.39E-07    |
| Chr4 | 3844289 | 3845036 | 5   | 748  | 5.33E-08    |
| Chr4 | 3847858 | 3850845 | 12  | 2988 | 6.11E-12    |
| Chr4 | 3858790 | 3859882 | 4   | 1093 | 7.32E-08    |
| Chr4 | 3864486 | 3865862 | 7   | 1377 | 1.04E-09    |
| Chr4 | 3871897 | 3872106 | 6   | 210  | 3.44E-08    |
| Chr4 | 3873533 | 3875138 | 4   | 1606 | 6.33337E-06 |
| Chr4 | 3881382 | 3882518 | 5   | 1137 | 5.38E-11    |
| Chr4 | 3906722 | 3908431 | 7   | 1710 | 5.12E-10    |
| Chr4 | 3911585 | 3912983 | 5   | 1399 | 3.67974E-07 |
| Chr4 | 3915204 | 3917428 | 11  | 2225 | 1.16E-16    |
| Chr4 | 3921772 | 3922988 | 4   | 1217 | 3.73611E-05 |
| Chr4 | 3925084 | 3928115 | 8   | 3032 | 6.79E-11    |
| Chr4 | 3933819 | 3934803 | 5   | 985  | 1.83E-07    |
| Chr4 | 3936205 | 3938712 | 4   | 2508 | 7.14983E-05 |
| Chr4 | 3941634 | 3942761 | 4   | 1128 | 0.000234486 |
| Chr4 | 3946968 | 3948232 | 6   | 1265 | 1.79E-10    |
| Chr4 | 3950508 | 3955923 | 368 | 5416 | 0           |
| Chr4 | 3959213 | 3966793 | 79  | 7581 | 1.04E-74    |
| Chr4 | 3967943 | 3969327 | 20  | 1385 | 3.90E-24    |
| Chr4 | 3973432 | 3975031 | 7   | 1600 | 1.43E-07    |
| Chr4 | 3977492 | 3980545 | 52  | 3054 | 3.30E-50    |
| Chr4 | 3982483 | 3983676 | 8   | 1194 | 2.17972E-07 |
| Chr4 | 3987312 | 3987767 | 7   | 456  | 3.68E-07    |
| Chr4 | 3994140 | 3996301 | 25  | 2162 | 4.42E-30    |
| Chr4 | 3999872 | 4000727 | 7   | 856  | 1.66E-08    |
| Chr4 | 4002028 | 4002250 | 11  | 223  | 4.45E-16    |
| Chr4 | 4003847 | 4004200 | 6   | 354  | 1.57206E-06 |
| Chr4 | 4005670 | 4007377 | 25  | 1708 | 8.00E-16    |
| Chr4 | 4008775 | 4011630 | 35  | 2856 | 5.64E-28    |
| Chr4 | 4018867 | 4019878 | 4   | 1012 | 6.41601E-07 |
| Chr4 | 4023756 | 4025958 | 5   | 2203 | 8.73E-08    |
| Chr4 | 4034012 | 4037571 | 13  | 3560 | 1.77E-13    |
| Chr4 | 4045396 | 4047296 | 9   | 1901 | 1.02E-11    |
| Chr4 | 4062384 | 4063056 | 6   | 673  | 6.13E-09    |
| Chr4 | 4065504 | 4069079 | 11  | 3576 | 1.22E-21    |
| Chr4 | 4110262 | 4112149 | 5   | 1888 | 7.82E-08    |
| Chr4 | 4160302 | 4161929 | 4   | 1628 | 2.55309E-05 |
| Chr4 | 4180605 | 4183670 | 8   | 3066 | 1.30E-09    |
| Chr4 | 4214910 | 4216620 | 5   | 1711 | 1.46E-07    |
| Chr4 | 4239790 | 4243332 | 16  | 3543 | 9.54E-16    |
| Chr4 | 4244757 | 4246056 | 6   | 1300 | 4.68E-08    |
| Chr4 | 4249137 | 4249821 | 5   | 685  | 1.29971E-06 |
| Chr4 | 4257365 | 4260311 | 6   | 2947 | 9.04E-11    |
| Chr4 | 4268939 | 4270988 | 8   | 2050 | 4.28E-10    |
| Chr4 | 4274037 | 4277437 | 12  | 3401 | 1.58E-18    |
| Chr4 | 4278597 | 4280956 | 7   | 2360 | 1.46E-09    |
| Chr4 | 4282321 | 4284497 | 7   | 2177 | 2.37E-08    |
| Chr4 | 4288105 | 4289130 | 7   | 1026 | 2.90E-12    |
| Chr4 | 4300666 | 4303000 | 6   | 2335 | 1.04E-12    |
| Chr4 | 4304645 | 4307213 | 12  | 2569 | 2.05E-16    |
| Chr4 | 4337340 | 4338928 | 4   | 1589 | 0.001196851 |
| Chr4 | 4354305 | 4356584 | 4   | 2280 | 4.9015E-06  |
| Chr4 | 4360897 | 4366139 | 16  | 5243 | 2.27E-16    |
| Chr4 | 4371250 | 4373137 | 6   | 1888 | 1.42E-10    |
| Chr4 | 4383250 | 4387154 | 11  | 3905 | 1.78E-11    |
| Chr4 | 4390069 | 4391494 | 4   | 1426 | 0.001067544 |
| Chr4 | 4392712 | 4393843 | 8   | 1132 | 9.95E-10    |

|      |         |         |    |      |             |
|------|---------|---------|----|------|-------------|
| Chr4 | 4402205 | 4403679 | 5  | 1475 | 1.81988E-06 |
| Chr4 | 4406979 | 4407853 | 5  | 875  | 1.57E-07    |
| Chr4 | 4409085 | 4411507 | 12 | 2423 | 2.59E-15    |
| Chr4 | 4418319 | 4419371 | 5  | 1053 | 1.10232E-06 |
| Chr4 | 4422840 | 4428033 | 9  | 5194 | 6.77E-13    |
| Chr4 | 4477882 | 4479267 | 4  | 1386 | 2.95226E-05 |
| Chr4 | 4487608 | 4488117 | 6  | 510  | 3.00E-09    |
| Chr4 | 4511530 | 4513136 | 7  | 1607 | 2.38E-09    |
| Chr4 | 4515380 | 4516365 | 6  | 986  | 3.80E-09    |
| Chr4 | 4521785 | 4523598 | 4  | 1814 | 0.002877655 |
| Chr4 | 4540590 | 4543471 | 10 | 2882 | 1.79E-12    |
| Chr4 | 4552319 | 4556632 | 17 | 4314 | 6.29E-21    |
| Chr4 | 4560330 | 4562547 | 11 | 2218 | 4.11E-13    |
| Chr4 | 4568758 | 4569823 | 6  | 1066 | 6.23E-08    |
| Chr4 | 4600811 | 4603311 | 10 | 2501 | 7.99E-13    |
| Chr4 | 4651978 | 4654758 | 6  | 2781 | 5.24E-11    |
| Chr4 | 4678241 | 4682703 | 12 | 4463 | 4.61E-15    |
| Chr4 | 4708801 | 4710701 | 5  | 1901 | 6.266E-06   |
| Chr4 | 4717689 | 4718668 | 4  | 980  | 1.81514E-05 |
| Chr4 | 4722784 | 4727411 | 16 | 4628 | 1.79E-17    |
| Chr4 | 4735322 | 4737268 | 6  | 1947 | 7.20E-07    |
| Chr4 | 4742843 | 4745992 | 9  | 3150 | 6.57E-09    |
| Chr4 | 4760313 | 4761369 | 10 | 1057 | 1.52E-16    |
| Chr4 | 4762603 | 4764872 | 13 | 2270 | 1.75E-14    |
| Chr4 | 4774343 | 4775107 | 5  | 765  | 2.81E-07    |
| Chr4 | 4776421 | 4781354 | 19 | 4934 | 3.25E-18    |
| Chr4 | 4831742 | 4832974 | 4  | 1233 | 8.1797E-06  |
| Chr4 | 4855855 | 4856792 | 5  | 938  | 1.26964E-05 |
| Chr4 | 4858244 | 4859252 | 4  | 1009 | 6.09534E-05 |
| Chr4 | 4894999 | 4897578 | 5  | 2580 | 4.54E-08    |
| Chr4 | 4946040 | 4947031 | 5  | 992  | 7.1544E-06  |
| Chr4 | 4962618 | 4964861 | 9  | 2244 | 2.61E-13    |
| Chr4 | 4987675 | 4989522 | 8  | 1848 | 4.34E-11    |
| Chr4 | 5003657 | 5003748 | 4  | 92   | 6.77E-07    |
| Chr4 | 5007717 | 5011199 | 10 | 3483 | 1.33E-14    |
| Chr4 | 5016499 | 5018370 | 7  | 1872 | 5.60E-11    |
| Chr4 | 5021603 | 5022358 | 4  | 756  | 5.9905E-05  |
| Chr4 | 5039810 | 5041297 | 5  | 1488 | 7.54111E-06 |
| Chr4 | 5044158 | 5048882 | 15 | 4725 | 5.49E-18    |
| Chr4 | 5049892 | 5051200 | 4  | 1309 | 2.74E-07    |
| Chr4 | 5053626 | 5056569 | 7  | 2944 | 1.04004E-05 |
| Chr4 | 5062237 | 5063534 | 7  | 1298 | 3.32E-10    |
| Chr4 | 5064698 | 5065563 | 4  | 866  | 4.37147E-05 |
| Chr4 | 5067897 | 5071289 | 12 | 3393 | 6.66E-12    |
| Chr4 | 5074528 | 5077575 | 14 | 3048 | 6.27E-18    |
| Chr4 | 5083475 | 5083832 | 4  | 358  | 5.20765E-06 |
| Chr4 | 5098223 | 5102962 | 9  | 4740 | 3.79E-14    |
| Chr4 | 5107315 | 5108078 | 4  | 764  | 3.73428E-06 |
| Chr4 | 5126823 | 5127790 | 4  | 968  | 9.54386E-06 |
| Chr4 | 5128893 | 5131606 | 8  | 2714 | 1.38E-09    |
| Chr4 | 5303637 | 5307176 | 9  | 3540 | 6.77E-13    |
| Chr4 | 5335019 | 5335880 | 4  | 862  | 1.99548E-06 |
| Chr4 | 5347981 | 5350477 | 8  | 2497 | 4.03E-13    |
| Chr4 | 5399067 | 5401742 | 8  | 2676 | 2.08E-11    |
| Chr4 | 5487782 | 5490277 | 7  | 2496 | 9.66E-09    |
| Chr4 | 5493314 | 5493639 | 4  | 326  | 8.97881E-05 |
| Chr4 | 5520877 | 5522536 | 9  | 1660 | 3.07E-11    |
| Chr4 | 5527789 | 5529025 | 4  | 1237 | 2.99E-07    |
| Chr4 | 5573184 | 5573425 | 4  | 242  | 2.92E-07    |
| Chr4 | 5584088 | 5585409 | 6  | 1322 | 2.63E-07    |
| Chr4 | 5595681 | 5596189 | 4  | 509  | 3.64E-07    |
| Chr4 | 5697727 | 5697837 | 4  | 111  | 3.51658E-06 |
| Chr4 | 5767537 | 5769034 | 4  | 1498 | 4.78815E-06 |



|      |          |          |    |      |             |
|------|----------|----------|----|------|-------------|
| Chr4 | 5821522  | 5825295  | 11 | 3774 | 4.06E-10    |
| Chr4 | 5826474  | 5827120  | 4  | 647  | 5.29083E-06 |
| Chr4 | 5939681  | 5941110  | 6  | 1430 | 3.98E-09    |
| Chr4 | 5946628  | 5946764  | 4  | 137  | 4.46616E-06 |
| Chr4 | 5966717  | 5968057  | 6  | 1341 | 1.61E-08    |
| Chr4 | 6014748  | 6015356  | 4  | 609  | 3.07E-07    |
| Chr4 | 6468286  | 6468972  | 4  | 687  | 3.23259E-05 |
| Chr4 | 6470912  | 6472891  | 5  | 1980 | 4.13064E-06 |
| Chr4 | 6533842  | 6534520  | 4  | 679  | 6.13E-07    |
| Chr4 | 6724209  | 6724947  | 4  | 739  | 0.000270524 |
| Chr4 | 6727605  | 6728487  | 5  | 883  | 9.85E-09    |
| Chr4 | 6918560  | 6919249  | 6  | 690  | 2.71E-12    |
| Chr4 | 7357289  | 7358913  | 4  | 1625 | 0.000486599 |
| Chr4 | 7525927  | 7526431  | 4  | 505  | 6.27207E-06 |
| Chr4 | 8317590  | 8319642  | 8  | 2053 | 2.43E-11    |
| Chr4 | 8903639  | 8904140  | 4  | 502  | 7.60E-10    |
| Chr4 | 9069240  | 9070418  | 4  | 1179 | 3.7431E-06  |
| Chr4 | 9486162  | 9488257  | 5  | 2096 | 9.63E-09    |
| Chr4 | 9489408  | 9491543  | 4  | 2136 | 5.87255E-07 |
| Chr4 | 9511364  | 9513423  | 5  | 2060 | 3.76E-07    |
| Chr4 | 9732710  | 9733983  | 6  | 1274 | 5.14E-07    |
| Chr4 | 9909366  | 9909768  | 4  | 403  | 1.63E-07    |
| Chr4 | 10036864 | 10037804 | 4  | 941  | 1.81912E-06 |
| Chr4 | 10544476 | 10545571 | 4  | 1096 | 4.92926E-05 |
| Chr4 | 10993951 | 10996711 | 12 | 2761 | 4.18E-17    |
| Chr4 | 11040074 | 11041188 | 4  | 1115 | 8.30256E-06 |
| Chr4 | 11091416 | 11093331 | 7  | 1916 | 2.18E-11    |
| Chr4 | 11137610 | 11139223 | 5  | 1614 | 9.07E-09    |
| Chr4 | 11415889 | 11416112 | 4  | 224  | 1.16616E-06 |
| Chr4 | 11822550 | 11823162 | 4  | 613  | 8.79818E-05 |
| Chr4 | 11836903 | 11838285 | 9  | 1383 | 1.21E-13    |
| Chr4 | 11845061 | 11846309 | 4  | 1249 | 4.69318E-06 |
| Chr4 | 13329783 | 13331843 | 8  | 2061 | 9.78E-10    |
| Chr4 | 13628323 | 13631492 | 12 | 3170 | 1.95E-15    |
| Chr4 | 14787621 | 14787956 | 4  | 336  | 2.99E-08    |
| Chr4 | 16081712 | 16082380 | 4  | 669  | 3.92222E-06 |
| Chr4 | 17664070 | 17664176 | 4  | 107  | 5.84716E-06 |
| Chr4 | 17713016 | 17714670 | 6  | 1655 | 3.80E-08    |
| Chr4 | 17715863 | 17716954 | 4  | 1092 | 8.88508E-06 |
| Chr5 | 65136    | 69114    | 19 | 3979 | 6.53E-15    |
| Chr5 | 743930   | 744733   | 4  | 804  | 3.34465E-06 |
| Chr5 | 2106298  | 2107666  | 4  | 1369 | 6.9487E-05  |
| Chr5 | 2260865  | 2262238  | 5  | 1374 | 0.002236739 |
| Chr5 | 2347215  | 2348190  | 5  | 976  | 5.42E-10    |
| Chr5 | 2391925  | 2394972  | 9  | 3048 | 2.33E-12    |
| Chr5 | 2442626  | 2443233  | 7  | 608  | 6.61479E-06 |
| Chr5 | 3253146  | 3253245  | 16 | 100  | 4.12E-25    |
| Chr5 | 3904877  | 3905560  | 7  | 684  | 1.96E-08    |
| Chr5 | 3908197  | 3910412  | 4  | 2216 | 3.73455E-05 |
| Chr5 | 4321082  | 4322082  | 5  | 1001 | 1.56E-07    |
| Chr5 | 4324350  | 4325576  | 7  | 1227 | 5.68753E-07 |
| Chr5 | 5112193  | 5113519  | 5  | 1327 | 1.29465E-06 |
| Chr5 | 5217538  | 5220188  | 9  | 2651 | 1.06E-10    |
| Chr5 | 5644119  | 5645788  | 7  | 1670 | 4.58E-10    |
| Chr5 | 6207035  | 6208380  | 4  | 1346 | 2.00832E-05 |
| Chr5 | 6211487  | 6212321  | 4  | 835  | 4.13508E-05 |
| Chr5 | 6349307  | 6350245  | 4  | 939  | 1.4837E-06  |
| Chr5 | 6406923  | 6407725  | 4  | 803  | 3.36015E-05 |
| Chr5 | 6632180  | 6633226  | 5  | 1047 | 1.03497E-06 |
| Chr5 | 7027938  | 7030231  | 7  | 2294 | 6.74E-09    |
| Chr5 | 7031761  | 7032972  | 5  | 1212 | 1.78236E-05 |
| Chr5 | 7036699  | 7037005  | 5  | 307  | 9.38E-09    |
| Chr5 | 7412854  | 7412907  | 4  | 54   | 9.92207E-06 |

|      |          |          |     |      |             |
|------|----------|----------|-----|------|-------------|
| Chr5 | 7414910  | 7416040  | 5   | 1131 | 1.13E-10    |
| Chr5 | 7824202  | 7824516  | 6   | 315  | 2.90E-07    |
| Chr5 | 8292916  | 8293257  | 4   | 342  | 3.88E-12    |
| Chr5 | 8549786  | 8550509  | 6   | 724  | 2.11E-09    |
| Chr5 | 8572162  | 8574440  | 8   | 2279 | 2.23E-11    |
| Chr5 | 8613927  | 8614577  | 4   | 651  | 1.48042E-06 |
| Chr5 | 8666437  | 8667114  | 6   | 678  | 8.46E-09    |
| Chr5 | 8721664  | 8723250  | 6   | 1587 | 7.70E-11    |
| Chr5 | 8919038  | 8919100  | 4   | 63   | 6.76E-07    |
| Chr5 | 9091486  | 9093336  | 5   | 1851 | 6.07E-09    |
| Chr5 | 9184876  | 9185647  | 5   | 772  | 1.79E-09    |
| Chr5 | 9186777  | 9188373  | 8   | 1597 | 5.95E-09    |
| Chr5 | 9251639  | 9253330  | 4   | 1692 | 3.15515E-05 |
| Chr5 | 9561474  | 9565132  | 9   | 3659 | 7.49E-15    |
| Chr5 | 9567518  | 9568250  | 7   | 733  | 2.30E-12    |
| Chr5 | 9710806  | 9711799  | 4   | 994  | 0.000121974 |
| Chr5 | 9906775  | 9909493  | 10  | 2719 | 3.29E-10    |
| Chr5 | 9925169  | 9928595  | 18  | 3427 | 2.70E-20    |
| Chr5 | 9949546  | 9952725  | 12  | 3180 | 1.52E-19    |
| Chr5 | 9979037  | 9980012  | 5   | 976  | 3.55E-07    |
| Chr5 | 9981558  | 9982543  | 4   | 986  | 9.25608E-06 |
| Chr5 | 9996993  | 9998258  | 4   | 1266 | 0.000150948 |
| Chr5 | 10051295 | 10053664 | 8   | 2370 | 5.06E-10    |
| Chr5 | 10054912 | 10056251 | 5   | 1340 | 2.87E-08    |
| Chr5 | 10095891 | 10099603 | 8   | 3713 | 3.18E-12    |
| Chr5 | 10103829 | 10106598 | 10  | 2770 | 1.06E-14    |
| Chr5 | 10139930 | 10141550 | 5   | 1621 | 5.85E-08    |
| Chr5 | 10170566 | 10171775 | 4   | 1210 | 0.000146865 |
| Chr5 | 10359820 | 10363210 | 9   | 3391 | 6.21E-12    |
| Chr5 | 10367403 | 10368350 | 5   | 948  | 3.17E-10    |
| Chr5 | 10463841 | 10464128 | 4   | 288  | 4.03016E-06 |
| Chr5 | 10497654 | 10498616 | 4   | 963  | 3.48352E-05 |
| Chr5 | 10573309 | 10575559 | 5   | 2251 | 2.04235E-05 |
| Chr5 | 10577110 | 10578062 | 5   | 953  | 1.32E-07    |
| Chr5 | 10579783 | 10580801 | 4   | 1019 | 9.57301E-06 |
| Chr5 | 10582872 | 10584764 | 8   | 1893 | 3.14E-10    |
| Chr5 | 10591472 | 10595971 | 12  | 4500 | 2.63E-15    |
| Chr5 | 10626413 | 10627108 | 5   | 696  | 1.22E-09    |
| Chr5 | 10632847 | 10632943 | 4   | 97   | 5.28E-07    |
| Chr5 | 10725080 | 10726764 | 4   | 1685 | 6.30017E-06 |
| Chr5 | 10728248 | 10729912 | 7   | 1665 | 1.86E-08    |
| Chr5 | 10730932 | 10733249 | 9   | 2318 | 1.51E-12    |
| Chr5 | 10743623 | 10745579 | 6   | 1957 | 2.99E-09    |
| Chr5 | 10756183 | 10756797 | 4   | 615  | 8.24109E-06 |
| Chr5 | 10767764 | 10769713 | 6   | 1950 | 1.39449E-06 |
| Chr5 | 10795491 | 10795729 | 4   | 239  | 3.54004E-05 |
| Chr5 | 10888358 | 10888907 | 4   | 550  | 2.08E-08    |
| Chr5 | 10890270 | 10890512 | 4   | 243  | 2.33469E-06 |
| Chr5 | 10942101 | 10943200 | 4   | 1100 | 1.56E-09    |
| Chr5 | 10948455 | 10949554 | 6   | 1100 | 1.82E-09    |
| Chr5 | 10974438 | 10975829 | 4   | 1392 | 3.94E-07    |
| Chr5 | 11037810 | 11039673 | 4   | 1864 | 0.002704158 |
| Chr5 | 11079058 | 11081661 | 9   | 2604 | 1.12E-10    |
| Chr5 | 11089718 | 11092353 | 10  | 2636 | 1.97E-13    |
| Chr5 | 11099287 | 11101491 | 7   | 2205 | 1.89E-09    |
| Chr5 | 11105001 | 11109398 | 10  | 4398 | 3.69E-13    |
| Chr5 | 11110710 | 11114819 | 12  | 4110 | 1.05E-15    |
| Chr5 | 11127756 | 11129608 | 5   | 1853 | 1.37E-08    |
| Chr5 | 11156506 | 11159128 | 5   | 2623 | 3.45148E-06 |
| Chr5 | 11161268 | 11163144 | 5   | 1877 | 7.11E-08    |
| Chr5 | 11169981 | 11170617 | 4   | 637  | 2.832E-06   |
| Chr5 | 11178756 | 11182322 | 31  | 3567 | 5.46E-35    |
| Chr5 | 11184651 | 11188882 | 182 | 4232 | 2.33E-198   |

|      |          |          |     |       |             |
|------|----------|----------|-----|-------|-------------|
| Chr5 | 11194946 | 11198591 | 10  | 3646  | 3.49E-14    |
| Chr5 | 11206996 | 11209509 | 9   | 2514  | 4.19E-12    |
| Chr5 | 11214848 | 11217535 | 10  | 2688  | 1.05E-11    |
| Chr5 | 11223797 | 11224837 | 5   | 1041  | 3.63574E-07 |
| Chr5 | 11315891 | 11318613 | 6   | 2723  | 1.76E-08    |
| Chr5 | 11324436 | 11325292 | 4   | 857   | 1.35754E-05 |
| Chr5 | 11327363 | 11328762 | 11  | 1400  | 6.42E-09    |
| Chr5 | 11335731 | 11337159 | 4   | 1429  | 0.000211989 |
| Chr5 | 11338236 | 11339616 | 5   | 1381  | 1.48E-08    |
| Chr5 | 11343146 | 11347168 | 12  | 4023  | 1.32E-12    |
| Chr5 | 11348493 | 11352954 | 12  | 4462  | 4.49E-10    |
| Chr5 | 11364986 | 11366356 | 6   | 1371  | 6.39E-09    |
| Chr5 | 11369529 | 11370610 | 7   | 1082  | 2.09E-10    |
| Chr5 | 11390943 | 11392579 | 6   | 1637  | 3.49E-07    |
| Chr5 | 11393698 | 11395979 | 7   | 2282  | 2.76E-09    |
| Chr5 | 11397962 | 11400251 | 8   | 2290  | 1.14E-09    |
| Chr5 | 11408625 | 11412188 | 8   | 3564  | 9.94E-11    |
| Chr5 | 11413691 | 11415596 | 4   | 1906  | 2.5517E-06  |
| Chr5 | 11422233 | 11423751 | 6   | 1519  | 1.04E-09    |
| Chr5 | 11430161 | 11433271 | 13  | 3111  | 1.45E-16    |
| Chr5 | 11434897 | 11437609 | 9   | 2713  | 1.61E-12    |
| Chr5 | 11439139 | 11440946 | 6   | 1808  | 6.12E-10    |
| Chr5 | 11448822 | 11450433 | 4   | 1612  | 7.62E-08    |
| Chr5 | 11453150 | 11456164 | 12  | 3015  | 5.79E-14    |
| Chr5 | 11466143 | 11467286 | 5   | 1144  | 1.13E-08    |
| Chr5 | 11474673 | 11478653 | 12  | 3981  | 2.70E-17    |
| Chr5 | 11484593 | 11485337 | 5   | 745   | 1.73E-07    |
| Chr5 | 11505625 | 11509205 | 10  | 3581  | 5.03E-12    |
| Chr5 | 11510246 | 11511300 | 5   | 1055  | 1.25E-07    |
| Chr5 | 11518485 | 11519714 | 4   | 1230  | 1.06351E-06 |
| Chr5 | 11529641 | 11536341 | 18  | 6701  | 3.79E-17    |
| Chr5 | 11578538 | 11580543 | 15  | 2006  | 6.58E-21    |
| Chr5 | 11581650 | 11582946 | 5   | 1297  | 2.66E-07    |
| Chr5 | 11585668 | 11586965 | 5   | 1298  | 2.74E-07    |
| Chr5 | 11590446 | 11592299 | 7   | 1854  | 6.65E-11    |
| Chr5 | 11593317 | 11594544 | 8   | 1228  | 5.00E-09    |
| Chr5 | 11601721 | 11604066 | 8   | 2346  | 2.02E-07    |
| Chr5 | 11626131 | 11628953 | 11  | 2823  | 2.77E-13    |
| Chr5 | 11632950 | 11634314 | 4   | 1365  | 5.40291E-06 |
| Chr5 | 11642419 | 11644804 | 8   | 2386  | 2.82E-08    |
| Chr5 | 11645898 | 11646982 | 5   | 1085  | 4.98E-08    |
| Chr5 | 11649339 | 11650324 | 5   | 986   | 1.42895E-06 |
| Chr5 | 11651356 | 11652774 | 7   | 1419  | 1.18E-12    |
| Chr5 | 11656742 | 11658089 | 5   | 1348  | 7.11E-10    |
| Chr5 | 11660352 | 11661636 | 4   | 1285  | 2.84766E-06 |
| Chr5 | 11667471 | 11668184 | 9   | 714   | 1.53E-15    |
| Chr5 | 11690117 | 11690960 | 11  | 844   | 1.84E-10    |
| Chr5 | 11693775 | 11695296 | 5   | 1522  | 1.03971E-05 |
| Chr5 | 11697788 | 11698397 | 5   | 610   | 3.26E-07    |
| Chr5 | 11701557 | 11705627 | 78  | 4071  | 2.04E-82    |
| Chr5 | 11706790 | 11710957 | 32  | 4168  | 7.20E-28    |
| Chr5 | 11722873 | 11724699 | 48  | 1827  | 6.83E-36    |
| Chr5 | 11726080 | 11738205 | 242 | 12126 | 1.08E-260   |
| Chr5 | 11741713 | 11743740 | 6   | 2028  | 6.61E-09    |
| Chr5 | 11747420 | 11752187 | 14  | 4768  | 2.11E-16    |
| Chr5 | 11754352 | 11754866 | 4   | 515   | 0.000104716 |
| Chr5 | 11766281 | 11769368 | 8   | 3088  | 4.75E-10    |
| Chr5 | 11771075 | 11773039 | 6   | 1965  | 2.66E-11    |
| Chr5 | 11775546 | 11779062 | 12  | 3517  | 2.35E-15    |
| Chr5 | 11782806 | 11784963 | 7   | 2158  | 5.47E-08    |
| Chr5 | 11788568 | 11789252 | 12  | 685   | 7.21E-22    |
| Chr5 | 11795337 | 11796905 | 12  | 1569  | 9.05E-20    |
| Chr5 | 11798119 | 11799356 | 9   | 1238  | 3.36E-08    |

|      |          |          |     |      |             |
|------|----------|----------|-----|------|-------------|
| Chr5 | 11806578 | 11810180 | 11  | 3603 | 1.09E-15    |
| Chr5 | 11813810 | 11815238 | 6   | 1429 | 6.08E-10    |
| Chr5 | 11822758 | 11825086 | 7   | 2329 | 8.67E-11    |
| Chr5 | 11830916 | 11831148 | 8   | 233  | 5.97E-11    |
| Chr5 | 11832353 | 11836261 | 13  | 3909 | 7.86E-16    |
| Chr5 | 11837571 | 11838164 | 5   | 594  | 9.00131E-06 |
| Chr5 | 11842107 | 11844841 | 19  | 2735 | 3.29E-18    |
| Chr5 | 11846457 | 11848832 | 7   | 2376 | 7.71E-11    |
| Chr5 | 11906764 | 11911203 | 9   | 4440 | 6.67E-11    |
| Chr5 | 11912482 | 11914372 | 8   | 1891 | 4.79E-11    |
| Chr5 | 11915684 | 11918152 | 9   | 2469 | 1.40E-12    |
| Chr5 | 11920377 | 11925945 | 16  | 5569 | 1.08E-17    |
| Chr5 | 11935228 | 11944611 | 112 | 9384 | 1.04E-91    |
| Chr5 | 11962892 | 11964777 | 6   | 1886 | 1.26E-09    |
| Chr5 | 11976843 | 11977959 | 8   | 1117 | 5.20E-14    |
| Chr5 | 11985453 | 11991161 | 41  | 5709 | 2.02E-35    |
| Chr5 | 11997663 | 12003520 | 13  | 5858 | 2.65E-18    |
| Chr5 | 12010414 | 12012043 | 4   | 1630 | 3.42521E-05 |
| Chr5 | 12016528 | 12017867 | 7   | 1340 | 2.00E-10    |
| Chr5 | 12025861 | 12032244 | 15  | 6384 | 8.26E-11    |
| Chr5 | 12034345 | 12035782 | 8   | 1438 | 6.72E-12    |
| Chr5 | 12039798 | 12041776 | 10  | 1979 | 5.19E-11    |
| Chr5 | 12046484 | 12048241 | 4   | 1758 | 8.09E-10    |
| Chr5 | 12049273 | 12053802 | 11  | 4530 | 3.60E-15    |
| Chr5 | 12062578 | 12065117 | 9   | 2540 | 5.27E-08    |
| Chr5 | 12066190 | 12067442 | 4   | 1253 | 7.51E-07    |
| Chr5 | 12071950 | 12073929 | 4   | 1980 | 0.000487245 |
| Chr5 | 12096526 | 12098604 | 7   | 2079 | 9.86E-07    |
| Chr5 | 12099657 | 12100705 | 5   | 1049 | 0.000178767 |
| Chr5 | 12106150 | 12108786 | 14  | 2637 | 6.69E-16    |
| Chr5 | 12109955 | 12111942 | 6   | 1988 | 2.02E-08    |
| Chr5 | 12116623 | 12117689 | 5   | 1067 | 9.27E-08    |
| Chr5 | 12122768 | 12123203 | 4   | 436  | 8.34E-07    |
| Chr5 | 12124711 | 12125423 | 6   | 713  | 5.77909E-06 |
| Chr5 | 12128317 | 12129415 | 4   | 1099 | 1.30837E-06 |
| Chr5 | 12136766 | 12138891 | 6   | 2126 | 3.77E-09    |
| Chr5 | 12141392 | 12146637 | 14  | 5246 | 2.17E-20    |
| Chr5 | 12147706 | 12151688 | 11  | 3983 | 1.43E-15    |
| Chr5 | 12153496 | 12155804 | 5   | 2309 | 9.49E-08    |
| Chr5 | 12159601 | 12162957 | 12  | 3357 | 4.45E-18    |
| Chr5 | 12165808 | 12167515 | 8   | 1708 | 3.11E-09    |
| Chr5 | 12173788 | 12175911 | 8   | 2124 | 1.57351E-06 |
| Chr5 | 12177421 | 12178269 | 4   | 849  | 1.36926E-05 |
| Chr5 | 12184833 | 12186239 | 4   | 1407 | 2.75131E-06 |
| Chr5 | 12194555 | 12196690 | 6   | 2136 | 1.58206E-06 |
| Chr5 | 12204558 | 12205003 | 4   | 446  | 7.11E-07    |
| Chr5 | 12206281 | 12207426 | 5   | 1146 | 1.54826E-06 |
| Chr5 | 12214928 | 12217220 | 11  | 2293 | 1.58E-10    |
| Chr5 | 12234270 | 12234819 | 6   | 550  | 2.53E-09    |
| Chr5 | 12237580 | 12239048 | 4   | 1469 | 3.05428E-06 |
| Chr5 | 12242911 | 12244743 | 6   | 1833 | 2.96283E-06 |
| Chr5 | 12245854 | 12249106 | 9   | 3253 | 1.07E-09    |
| Chr5 | 12265585 | 12267513 | 6   | 1929 | 1.93E-09    |
| Chr5 | 12269782 | 12271504 | 5   | 1723 | 3.65E-07    |
| Chr5 | 12287938 | 12291279 | 12  | 3342 | 1.80E-11    |
| Chr5 | 12292893 | 12293870 | 4   | 978  | 3.22087E-06 |
| Chr5 | 12296319 | 12297306 | 4   | 988  | 5.47E-08    |
| Chr5 | 12298711 | 12299299 | 7   | 589  | 1.52E-11    |
| Chr5 | 12328175 | 12328821 | 4   | 647  | 0.001213519 |
| Chr5 | 12341545 | 12342259 | 5   | 715  | 2.76E-09    |
| Chr5 | 12343704 | 12345462 | 7   | 1759 | 1.29E-10    |
| Chr5 | 12347147 | 12349733 | 18  | 2587 | 6.14E-24    |
| Chr5 | 12367327 | 12369884 | 6   | 2558 | 1.51E-07    |

|      |          |          |    |      |             |
|------|----------|----------|----|------|-------------|
| Chr5 | 12382449 | 12383214 | 4  | 766  | 4.67E-08    |
| Chr5 | 12387351 | 12388388 | 4  | 1038 | 3.64447E-05 |
| Chr5 | 12396797 | 12400409 | 11 | 3613 | 5.60E-12    |
| Chr5 | 12410089 | 12410926 | 5  | 838  | 8.66327E-06 |
| Chr5 | 12428199 | 12431962 | 20 | 3764 | 5.03E-23    |
| Chr5 | 12456030 | 12456854 | 4  | 825  | 2.96E-08    |
| Chr5 | 12458055 | 12459718 | 5  | 1664 | 2.90859E-06 |
| Chr5 | 12468712 | 12471081 | 8  | 2370 | 1.51E-08    |
| Chr5 | 12517506 | 12518131 | 4  | 626  | 1.36885E-05 |
| Chr5 | 12520186 | 12520816 | 5  | 631  | 7.97E-07    |
| Chr5 | 12527233 | 12529285 | 7  | 2053 | 7.93E-11    |
| Chr5 | 12533731 | 12535587 | 8  | 1857 | 4.05E-11    |
| Chr5 | 12571191 | 12576500 | 15 | 5310 | 3.77E-20    |
| Chr5 | 12579907 | 12581398 | 4  | 1492 | 8.75629E-07 |
| Chr5 | 12609753 | 12611088 | 4  | 1336 | 7.54E-07    |
| Chr5 | 12612532 | 12613835 | 9  | 1304 | 3.58E-10    |
| Chr5 | 12625832 | 12630263 | 13 | 4432 | 1.83E-13    |
| Chr5 | 12631412 | 12633409 | 9  | 1998 | 1.57E-12    |
| Chr5 | 12637640 | 12638635 | 4  | 996  | 3.6528E-06  |
| Chr5 | 12646765 | 12647385 | 4  | 621  | 5.5211E-06  |
| Chr5 | 12649310 | 12650752 | 4  | 1443 | 2.59545E-06 |
| Chr5 | 12712468 | 12714451 | 5  | 1984 | 0.000169071 |
| Chr5 | 12715509 | 12715875 | 4  | 367  | 1.29229E-05 |
| Chr5 | 12737164 | 12738869 | 6  | 1706 | 2.29436E-06 |
| Chr5 | 12745992 | 12748825 | 13 | 2834 | 3.33E-17    |
| Chr5 | 12752765 | 12753949 | 5  | 1185 | 2.23152E-06 |
| Chr5 | 12756229 | 12764500 | 25 | 8272 | 9.77E-31    |
| Chr5 | 12767268 | 12768849 | 6  | 1582 | 2.39E-09    |
| Chr5 | 12771442 | 12773565 | 4  | 2124 | 2.77499E-06 |
| Chr5 | 12774751 | 12776738 | 5  | 1988 | 6.46932E-05 |
| Chr5 | 12792793 | 12794649 | 6  | 1857 | 1.98E-07    |
| Chr5 | 12810870 | 12811099 | 16 | 230  | 3.55E-19    |
| Chr5 | 12920451 | 12922010 | 5  | 1560 | 2.80471E-06 |
| Chr5 | 12927908 | 12930238 | 6  | 2331 | 1.30414E-06 |
| Chr5 | 12936579 | 12939031 | 4  | 2453 | 3.24597E-06 |
| Chr5 | 12945984 | 12948278 | 5  | 2295 | 6.21E-07    |
| Chr5 | 12949514 | 12950851 | 7  | 1338 | 2.95E-07    |
| Chr5 | 12972723 | 12976007 | 8  | 3285 | 1.98E-12    |
| Chr5 | 12985114 | 12986992 | 5  | 1879 | 1.32E-08    |
| Chr5 | 12992344 | 12994136 | 8  | 1793 | 8.24E-12    |
| Chr5 | 13000225 | 13001384 | 6  | 1160 | 1.75E-10    |
| Chr5 | 13011100 | 13013710 | 7  | 2611 | 1.56E-09    |
| Chr5 | 13017771 | 13019627 | 6  | 1857 | 7.02E-09    |
| Chr5 | 13022478 | 13026368 | 13 | 3891 | 8.22E-18    |
| Chr5 | 13032944 | 13035546 | 7  | 2603 | 6.81E-12    |
| Chr5 | 13070684 | 13072059 | 4  | 1376 | 5.72E-07    |
| Chr5 | 13073153 | 13074872 | 5  | 1720 | 2.46E-07    |
| Chr5 | 13120136 | 13121561 | 7  | 1426 | 1.38E-10    |
| Chr5 | 13128223 | 13133053 | 14 | 4831 | 1.69E-16    |
| Chr5 | 13144563 | 13145269 | 5  | 707  | 9.60E-07    |
| Chr5 | 13147942 | 13149724 | 6  | 1783 | 1.52E-07    |
| Chr5 | 13163225 | 13165950 | 8  | 2726 | 2.29E-09    |
| Chr5 | 13167275 | 13168132 | 5  | 858  | 7.31E-07    |
| Chr5 | 13171558 | 13173488 | 6  | 1931 | 1.21E-07    |
| Chr5 | 13185604 | 13186519 | 4  | 916  | 5.40E-07    |
| Chr5 | 13229240 | 13230244 | 5  | 1005 | 6.23969E-05 |
| Chr5 | 13254040 | 13254752 | 4  | 713  | 3.38646E-05 |
| Chr5 | 13257176 | 13257949 | 4  | 774  | 1.24E-07    |
| Chr5 | 13262487 | 13263740 | 4  | 1254 | 0.000161638 |
| Chr5 | 13282420 | 13283118 | 5  | 699  | 2.35E-07    |
| Chr5 | 13287372 | 13289170 | 4  | 1799 | 9.10011E-06 |
| Chr5 | 13290494 | 13293792 | 9  | 3299 | 1.34E-08    |
| Chr5 | 13302432 | 13303582 | 5  | 1151 | 2.5199E-06  |

|      |          |          |    |      |             |
|------|----------|----------|----|------|-------------|
| Chr5 | 13320867 | 13321975 | 4  | 1109 | 1.70522E-05 |
| Chr5 | 13326017 | 13328720 | 12 | 2704 | 2.35E-12    |
| Chr5 | 13335957 | 13336791 | 4  | 835  | 1.27958E-05 |
| Chr5 | 13377368 | 13378930 | 5  | 1563 | 1.62712E-05 |
| Chr5 | 13381403 | 13382930 | 6  | 1528 | 5.25E-07    |
| Chr5 | 13396454 | 13397966 | 7  | 1513 | 7.93E-11    |
| Chr5 | 13404749 | 13410064 | 19 | 5316 | 2.38E-25    |
| Chr5 | 13528546 | 13530220 | 5  | 1675 | 1.47E-09    |
| Chr5 | 13536761 | 13538306 | 7  | 1546 | 5.00E-08    |
| Chr5 | 13641620 | 13642289 | 4  | 670  | 1.29E-07    |
| Chr5 | 13656642 | 13657008 | 4  | 367  | 9.66388E-06 |
| Chr5 | 13717819 | 13718661 | 7  | 843  | 5.10E-12    |
| Chr5 | 13782761 | 13784101 | 4  | 1341 | 3.88497E-05 |
| Chr5 | 13835401 | 13837256 | 4  | 1856 | 0.000119275 |
| Chr5 | 13845912 | 13848259 | 7  | 2348 | 4.77E-09    |
| Chr5 | 13887325 | 13888901 | 5  | 1577 | 9.74E-07    |
| Chr5 | 13925910 | 13926241 | 4  | 332  | 2.10628E-06 |
| Chr5 | 13998883 | 13999263 | 4  | 381  | 1.52027E-06 |
| Chr5 | 14200247 | 14200816 | 4  | 570  | 1.50326E-06 |
| Chr5 | 14204309 | 14206338 | 4  | 2030 | 1.87948E-06 |
| Chr5 | 14256520 | 14257914 | 9  | 1395 | 4.78E-14    |
| Chr5 | 14259868 | 14261190 | 4  | 1323 | 6.57228E-06 |
| Chr5 | 14270413 | 14272576 | 5  | 2164 | 4.44743E-08 |
| Chr5 | 14577588 | 14578659 | 4  | 1072 | 4.5922E-05  |
| Chr5 | 14678272 | 14681092 | 8  | 2821 | 3.09E-09    |
| Chr5 | 14831562 | 14832753 | 4  | 1192 | 2.18022E-05 |
| Chr5 | 14834085 | 14834124 | 4  | 40   | 7.05E-08    |
| Chr5 | 15101615 | 15101886 | 6  | 272  | 2.30E-08    |
| Chr5 | 15234575 | 15236881 | 5  | 2307 | 1.07619E-05 |
| Chr5 | 15353026 | 15354533 | 5  | 1508 | 1.80E-07    |
| Chr5 | 15357040 | 15358235 | 5  | 1196 | 2.40E-08    |
| Chr5 | 15360143 | 15361057 | 5  | 915  | 2.20E-09    |
| Chr5 | 15493492 | 15498216 | 19 | 4725 | 1.41E-22    |
| Chr5 | 15646283 | 15648855 | 8  | 2573 | 7.13E-14    |
| Chr5 | 15720542 | 15721372 | 5  | 831  | 1.31E-07    |
| Chr5 | 15919179 | 15919703 | 4  | 525  | 5.28172E-05 |
| Chr5 | 15924655 | 15926750 | 6  | 2096 | 1.21717E-06 |
| Chr5 | 16700397 | 16701580 | 5  | 1184 | 4.71795E-07 |
| Chr5 | 16703194 | 16705769 | 8  | 2576 | 2.18E-08    |
| Chr5 | 17085751 | 17086476 | 4  | 726  | 9.45701E-05 |
| Chr5 | 17253156 | 17254556 | 6  | 1401 | 2.66E-07    |
| Chr5 | 17305056 | 17306134 | 4  | 1079 | 6.88399E-06 |
| Chr5 | 17441015 | 17444846 | 13 | 3832 | 4.67E-16    |
| Chr5 | 17597753 | 17599446 | 5  | 1694 | 4.83E-07    |
| Chr5 | 17602128 | 17604547 | 6  | 2420 | 7.07E-08    |
| Chr5 | 17740306 | 17742520 | 4  | 2215 | 1.18E-08    |
| Chr5 | 17890139 | 17890530 | 5  | 392  | 5.11E-08    |
| Chr5 | 18171382 | 18171600 | 4  | 219  | 2.24E-07    |
| Chr5 | 18195233 | 18197152 | 5  | 1920 | 1.39E-08    |
| Chr5 | 18473360 | 18474706 | 7  | 1347 | 3.14E-09    |
| Chr5 | 18476018 | 18477651 | 6  | 1634 | 1.90E-08    |
| Chr5 | 18480116 | 18480685 | 6  | 570  | 1.77E-09    |
| Chr5 | 18493272 | 18495197 | 8  | 1926 | 5.87E-11    |
| Chr5 | 19189395 | 19193340 | 7  | 3946 | 1.28E-10    |
| Chr5 | 19358620 | 19364537 | 18 | 5918 | 8.19E-23    |
| Chr5 | 20048435 | 20048702 | 4  | 268  | 2.13E-07    |
| Chr5 | 20209083 | 20209274 | 4  | 192  | 9.41E-07    |
| Chr5 | 20426819 | 20427468 | 8  | 650  | 1.72E-12    |
| Chr5 | 21544616 | 21545607 | 4  | 992  | 1.15357E-05 |
| Chr5 | 21689891 | 21690668 | 5  | 778  | 3.18665E-06 |
| Chr5 | 22616970 | 22618241 | 5  | 1272 | 7.17933E-07 |
| Chr5 | 24966579 | 24966594 | 4  | 16   | 7.97E-07    |

**-Pit Root 16 dat (Hypo-DMRs)**

| <b>Chromosome</b> | <b>Start</b> | <b>End</b> | <b>number of DMCs</b> | <b>DMR lenght</b> | <b>P-value</b> |
|-------------------|--------------|------------|-----------------------|-------------------|----------------|
| Chr1              | 2415419      | 2415896    | 4                     | 478               | 3.72E-08       |
| Chr1              | 7070852      | 7073346    | 4                     | 2495              | 6.12149E-06    |
| Chr1              | 7355539      | 7356850    | 4                     | 1312              | 2.87179E-06    |
| Chr1              | 7362422      | 7362813    | 5                     | 392               | 7.79873E-06    |
| Chr1              | 9577875      | 9578816    | 4                     | 942               | 9.37E-07       |
| Chr1              | 9685190      | 9687048    | 5                     | 1859              | 2.97475E-05    |
| Chr1              | 9689322      | 9691202    | 5                     | 1881              | 0.000155207    |
| Chr1              | 10361729     | 10362786   | 4                     | 1058              | 6.68571E-05    |
| Chr1              | 11065062     | 11066277   | 4                     | 1216              | 1.6224E-05     |
| Chr1              | 11508359     | 11510057   | 7                     | 1699              | 2.65E-10       |
| Chr1              | 12669255     | 12671187   | 5                     | 1933              | 3.9457E-06     |
| Chr1              | 13010666     | 13012451   | 5                     | 1786              | 1.54E-07       |
| Chr1              | 13336520     | 13339605   | 8                     | 3086              | 1.13E-07       |
| Chr1              | 13394355     | 13395249   | 6                     | 895               | 6.92E-10       |
| Chr1              | 13560278     | 13561414   | 4                     | 1137              | 4.78129E-05    |
| Chr1              | 13722287     | 13723172   | 5                     | 886               | 7.73441E-06    |
| Chr1              | 13796186     | 13798872   | 6                     | 2687              | 3.35E-10       |
| Chr1              | 13884075     | 13884921   | 4                     | 847               | 2.81282E-05    |
| Chr1              | 13923240     | 13924806   | 4                     | 1567              | 9.73776E-06    |
| Chr1              | 14083855     | 14084967   | 4                     | 1113              | 7.63E-08       |
| Chr1              | 14086457     | 14087861   | 4                     | 1405              | 6.58E-07       |
| Chr1              | 14089998     | 14091503   | 6                     | 1506              | 5.32E-07       |
| Chr1              | 14196988     | 14197775   | 4                     | 788               | 3.3682E-05     |
| Chr1              | 14201295     | 14202801   | 4                     | 1507              | 7.30248E-06    |
| Chr1              | 14218829     | 14220426   | 5                     | 1598              | 1.25E-07       |
| Chr1              | 14316542     | 14318876   | 6                     | 2335              | 8.20E-07       |
| Chr1              | 14325421     | 14326526   | 4                     | 1106              | 3.49674E-06    |
| Chr1              | 14475910     | 14476920   | 4                     | 1011              | 1.29342E-06    |
| Chr1              | 14497405     | 14498425   | 4                     | 1021              | 1.55549E-06    |
| Chr1              | 14582615     | 14582876   | 5                     | 262               | 4.27E-07       |
| Chr1              | 15493134     | 15495521   | 5                     | 2388              | 3.32E-07       |
| Chr1              | 15496830     | 15499997   | 8                     | 3168              | 9.41E-10       |
| Chr1              | 15517201     | 15519431   | 6                     | 2231              | 2.61E-11       |
| Chr1              | 15542721     | 15544765   | 4                     | 2045              | 4.58252E-06    |
| Chr1              | 15555533     | 15557634   | 5                     | 2102              | 9.08E-07       |
| Chr1              | 15567330     | 15569702   | 5                     | 2373              | 6.09621E-06    |
| Chr1              | 15709806     | 15711345   | 4                     | 1540              | 0.000112894    |
| Chr1              | 15801640     | 15803459   | 4                     | 1820              | 2.09751E-06    |
| Chr1              | 15996346     | 15996357   | 4                     | 12                | 9.66E-07       |
| Chr1              | 16016949     | 16018252   | 4                     | 1304              | 1.75221E-05    |
| Chr1              | 16046683     | 16048579   | 7                     | 1897              | 8.58E-10       |
| Chr1              | 16382348     | 16385159   | 4                     | 2812              | 6.92814E-05    |
| Chr1              | 16521839     | 16522813   | 4                     | 975               | 4.84655E-06    |
| Chr1              | 16530773     | 16531553   | 4                     | 781               | 3.17709E-05    |
| Chr1              | 16627076     | 16628880   | 6                     | 1805              | 5.46E-09       |
| Chr1              | 16633299     | 16635547   | 9                     | 2249              | 2.75E-11       |
| Chr1              | 18969556     | 18970861   | 4                     | 1306              | 5.81107E-06    |
| Chr1              | 19344695     | 19345539   | 4                     | 845               | 3.21875E-05    |
| Chr1              | 20089621     | 20090508   | 6                     | 888               | 5.27205E-06    |
| Chr1              | 21369215     | 21369424   | 4                     | 210               | 1.62779E-05    |
| Chr1              | 22102764     | 22104457   | 5                     | 1694              | 0.000115054    |
| Chr1              | 23358207     | 23359811   | 4                     | 1605              | 1.80658E-06    |
| Chr1              | 23568588     | 23569292   | 4                     | 705               | 3.07045E-05    |
| Chr1              | 24457216     | 24457562   | 4                     | 347               | 0.000382234    |
| Chr1              | 26368164     | 26369857   | 5                     | 1694              | 3.23E-10       |
| Chr1              | 29476498     | 29477730   | 4                     | 1233              | 8.66096E-05    |
| Chr2              | 1451         | 3445       | 16                    | 1995              | 2.54E-13       |
| Chr2              | 9696         | 10305      | 10                    | 610               | 1.77E-20       |
| Chr2              | 376154       | 376700     | 4                     | 547               | 9.07236E-06    |
| Chr2              | 821157       | 822296     | 4                     | 1140              | 8.34337E-06    |

|      |          |          |   |      |             |
|------|----------|----------|---|------|-------------|
| Chr2 | 1403239  | 1404077  | 4 | 839  | 2.44023E-06 |
| Chr2 | 1760837  | 1761941  | 4 | 1105 | 3.79027E-06 |
| Chr2 | 2506613  | 2507292  | 4 | 680  | 1.63E-08    |
| Chr2 | 2508312  | 2511215  | 5 | 2904 | 4.07E-08    |
| Chr2 | 2576106  | 2576260  | 4 | 155  | 8.38E-07    |
| Chr2 | 2683751  | 2684575  | 4 | 825  | 4.04771E-06 |
| Chr2 | 2804785  | 2807166  | 6 | 2382 | 4.25298E-06 |
| Chr2 | 2813085  | 2815214  | 5 | 2130 | 4.71E-08    |
| Chr2 | 2932509  | 2934385  | 4 | 1877 | 1.22832E-05 |
| Chr2 | 3232462  | 3233337  | 4 | 876  | 5.61656E-05 |
| Chr2 | 3269270  | 3269284  | 4 | 15   | 2.73E-09    |
| Chr2 | 3294675  | 3296407  | 9 | 1733 | 1.09E-10    |
| Chr2 | 3299704  | 3300764  | 4 | 1061 | 9.62121E-05 |
| Chr2 | 3313177  | 3315389  | 7 | 2213 | 5.81E-07    |
| Chr2 | 3319030  | 3321462  | 7 | 2433 | 1.08E-09    |
| Chr2 | 3339993  | 3341120  | 6 | 1128 | 3.50911E-06 |
| Chr2 | 3350957  | 3352758  | 7 | 1802 | 4.46E-09    |
| Chr2 | 3395112  | 3395163  | 4 | 52   | 8.30315E-06 |
| Chr2 | 3396470  | 3397102  | 6 | 633  | 1.03E-08    |
| Chr2 | 3464517  | 3465573  | 4 | 1057 | 9.44406E-06 |
| Chr2 | 4229280  | 4230936  | 4 | 1657 | 5.10E-10    |
| Chr2 | 4280870  | 4281432  | 4 | 563  | 1.53731E-06 |
| Chr2 | 4463313  | 4463430  | 4 | 118  | 6.21E-07    |
| Chr2 | 4491690  | 4493286  | 8 | 1597 | 8.08E-14    |
| Chr2 | 4711522  | 4712111  | 5 | 590  | 1.06E-08    |
| Chr2 | 4850571  | 4851990  | 4 | 1420 | 0.000168712 |
| Chr2 | 4903309  | 4904446  | 4 | 1138 | 4.32389E-06 |
| Chr2 | 4980466  | 4981107  | 4 | 642  | 2.92707E-06 |
| Chr2 | 4983852  | 4983931  | 4 | 80   | 6.86383E-06 |
| Chr2 | 5121928  | 5124459  | 4 | 2532 | 5.26924E-05 |
| Chr2 | 5128129  | 5130036  | 7 | 1908 | 7.30E-09    |
| Chr2 | 5134819  | 5136151  | 4 | 1333 | 3.22792E-06 |
| Chr2 | 5286986  | 5288772  | 5 | 1787 | 1.07E-07    |
| Chr2 | 5328871  | 5330166  | 4 | 1296 | 8.54771E-06 |
| Chr2 | 5365861  | 5368200  | 7 | 2340 | 1.29E-07    |
| Chr2 | 5375883  | 5377910  | 8 | 2028 | 1.81E-10    |
| Chr2 | 5560760  | 5561797  | 4 | 1038 | 5.03E-07    |
| Chr2 | 5621786  | 5622643  | 4 | 858  | 0.000286249 |
| Chr2 | 5628072  | 5629733  | 4 | 1662 | 5.81765E-05 |
| Chr2 | 5880606  | 5882398  | 5 | 1793 | 7.91494E-06 |
| Chr2 | 5984217  | 5985968  | 4 | 1752 | 0.000150758 |
| Chr2 | 6112803  | 6112871  | 4 | 69   | 3.34E-08    |
| Chr2 | 6334459  | 6335573  | 4 | 1115 | 6.23405E-06 |
| Chr2 | 6552301  | 6553261  | 4 | 961  | 1.10864E-06 |
| Chr2 | 6554675  | 6555599  | 4 | 925  | 1.81906E-05 |
| Chr2 | 6725397  | 6726422  | 5 | 1026 | 1.03E-08    |
| Chr2 | 6885245  | 6885416  | 4 | 172  | 6.39313E-05 |
| Chr2 | 7117555  | 7118484  | 5 | 930  | 2.71E-08    |
| Chr2 | 9123768  | 9124090  | 5 | 323  | 1.67E-07    |
| Chr2 | 9191574  | 9194080  | 6 | 2507 | 3.08124E-06 |
| Chr2 | 12450138 | 12451518 | 5 | 1381 | 1.98947E-05 |
| Chr2 | 15405297 | 15405764 | 4 | 468  | 1.35E-07    |
| Chr2 | 17500130 | 17500312 | 4 | 183  | 2.57343E-06 |
| Chr3 | 5278318  | 5278562  | 4 | 245  | 1.26887E-05 |
| Chr3 | 5280802  | 5282332  | 5 | 1531 | 2.42815E-05 |
| Chr3 | 9786507  | 9787776  | 4 | 1270 | 1.85635E-06 |
| Chr3 | 11018987 | 11020354 | 4 | 1368 | 4.87962E-06 |
| Chr3 | 11055028 | 11055071 | 4 | 44   | 7.56772E-05 |
| Chr3 | 11685090 | 11687101 | 5 | 2012 | 7.09E-07    |
| Chr3 | 11876353 | 11877111 | 4 | 759  | 1.34E-07    |
| Chr3 | 11942069 | 11943546 | 4 | 1478 | 9.95E-09    |
| Chr3 | 12003094 | 12004871 | 4 | 1778 | 2.81325E-05 |
| Chr3 | 12026138 | 12029904 | 8 | 3767 | 7.20E-13    |



|      |          |          |    |      |             |
|------|----------|----------|----|------|-------------|
| Chr3 | 12072074 | 12072815 | 4  | 742  | 2.23116E-06 |
| Chr3 | 12096330 | 12096885 | 4  | 556  | 3.62287E-06 |
| Chr3 | 12380597 | 12383321 | 6  | 2725 | 1.30E-08    |
| Chr3 | 12482011 | 12483714 | 5  | 1704 | 8.75482E-06 |
| Chr3 | 12496358 | 12497668 | 4  | 1311 | 2.58E-08    |
| Chr3 | 12570295 | 12570995 | 4  | 701  | 9.43E-07    |
| Chr3 | 12842404 | 12843991 | 4  | 1588 | 0.000256117 |
| Chr3 | 12935345 | 12937245 | 4  | 1901 | 2.55184E-06 |
| Chr3 | 12948115 | 12948694 | 5  | 580  | 1.01E-07    |
| Chr3 | 13411676 | 13412606 | 5  | 931  | 1.45E-07    |
| Chr3 | 13414418 | 13416049 | 6  | 1632 | 3.02E-08    |
| Chr3 | 13442532 | 13443419 | 6  | 888  | 3.06566E-06 |
| Chr3 | 13467913 | 13469024 | 5  | 1112 | 8.63E-07    |
| Chr3 | 13603987 | 13605343 | 7  | 1357 | 3.89E-08    |
| Chr3 | 13628010 | 13628799 | 5  | 790  | 6.98967E-05 |
| Chr3 | 13644346 | 13645346 | 6  | 1001 | 7.87E-07    |
| Chr3 | 13828856 | 13829423 | 4  | 568  | 1.21959E-05 |
| Chr3 | 13884418 | 13886186 | 7  | 1769 | 1.58E-09    |
| Chr3 | 13887442 | 13890441 | 6  | 3000 | 2.91E-08    |
| Chr3 | 13969351 | 13971520 | 6  | 2170 | 2.8127E-06  |
| Chr3 | 13976572 | 13977896 | 4  | 1325 | 1.36885E-05 |
| Chr3 | 14004972 | 14005819 | 4  | 848  | 1.5784E-05  |
| Chr3 | 14041031 | 14041731 | 4  | 701  | 1.93E-08    |
| Chr3 | 14119470 | 14122003 | 5  | 2534 | 9.50E-12    |
| Chr3 | 14160532 | 14161873 | 4  | 1342 | 0.000209404 |
| Chr3 | 14162881 | 14165403 | 7  | 2523 | 3.79E-11    |
| Chr3 | 14194733 | 14196839 | 11 | 2107 | 2.38E-13    |
| Chr3 | 14201448 | 14202143 | 6  | 696  | 1.32E-10    |
| Chr3 | 14221738 | 14223168 | 6  | 1431 | 4.95E-10    |
| Chr3 | 14247537 | 14248197 | 4  | 661  | 1.62123E-05 |
| Chr3 | 14262374 | 14264562 | 5  | 2189 | 1.93E-07    |
| Chr3 | 14349647 | 14351057 | 4  | 1411 | 0.000140406 |
| Chr3 | 14544290 | 14547265 | 6  | 2976 | 3.88E-08    |
| Chr3 | 14567901 | 14569182 | 4  | 1282 | 4.20E-07    |
| Chr3 | 14574020 | 14574884 | 4  | 865  | 9.00207E-05 |
| Chr3 | 14719540 | 14720799 | 4  | 1260 | 1.07256E-06 |
| Chr3 | 14764846 | 14766964 | 6  | 2119 | 7.18E-07    |
| Chr3 | 14976896 | 14978117 | 4  | 1222 | 5.46828E-05 |
| Chr3 | 15032450 | 15033089 | 4  | 640  | 0.00010033  |
| Chr3 | 15044613 | 15046073 | 4  | 1461 | 7.85327E-05 |
| Chr3 | 15119083 | 15122622 | 8  | 3540 | 1.12E-10    |
| Chr3 | 15147058 | 15148553 | 5  | 1496 | 7.92936E-06 |
| Chr3 | 15154170 | 15155826 | 7  | 1657 | 1.13E-08    |
| Chr3 | 15257979 | 15259566 | 4  | 1588 | 7.65126E-05 |
| Chr3 | 15310159 | 15311197 | 5  | 1039 | 4.57343E-06 |
| Chr3 | 15319480 | 15321481 | 6  | 2002 | 1.76E-09    |
| Chr3 | 15715569 | 15717360 | 4  | 1792 | 2.30E-07    |
| Chr3 | 17472744 | 17472791 | 6  | 48   | 2.99E-09    |
| Chr3 | 18791813 | 18792596 | 4  | 784  | 3.63522E-06 |
| Chr3 | 22232641 | 22232690 | 4  | 50   | 1.50E-07    |
| Chr3 | 23111385 | 23112553 | 7  | 1169 | 1.46E-10    |
| Chr4 | 413805   | 414280   | 5  | 476  | 1.60E-08    |
| Chr4 | 1677473  | 1678679  | 4  | 1207 | 8.58E-07    |
| Chr4 | 1761338  | 1762321  | 4  | 984  | 7.69E-08    |
| Chr4 | 1795166  | 1800705  | 13 | 5540 | 7.87E-14    |
| Chr4 | 1850621  | 1851572  | 4  | 952  | 5.70E-07    |
| Chr4 | 1920190  | 1921912  | 5  | 1723 | 7.45658E-06 |
| Chr4 | 2144028  | 2144710  | 4  | 683  | 1.36173E-05 |
| Chr4 | 2174590  | 2176217  | 4  | 1628 | 1.39478E-06 |
| Chr4 | 2207805  | 2209209  | 4  | 1405 | 3.21E-07    |
| Chr4 | 2270719  | 2271565  | 4  | 847  | 5.77385E-06 |
| Chr4 | 2915635  | 2916017  | 7  | 383  | 1.84E-09    |
| Chr4 | 2959557  | 2961118  | 4  | 1562 | 2.36134E-06 |

|      |          |          |    |      |             |
|------|----------|----------|----|------|-------------|
| Chr4 | 3061830  | 3062432  | 4  | 603  | 1.68892E-06 |
| Chr4 | 3090584  | 3091429  | 5  | 846  | 1.84E-07    |
| Chr4 | 3105861  | 3107684  | 4  | 1824 | 0.000225807 |
| Chr4 | 3382489  | 3384245  | 6  | 1757 | 4.11173E-06 |
| Chr4 | 3465663  | 3465892  | 5  | 230  | 6.29E-07    |
| Chr4 | 3486217  | 3487357  | 4  | 1141 | 9.99109E-07 |
| Chr4 | 3683384  | 3685570  | 5  | 2187 | 2.96772E-06 |
| Chr4 | 3691942  | 3692330  | 4  | 389  | 5.47988E-06 |
| Chr4 | 3695350  | 3696422  | 4  | 1073 | 6.35351E-06 |
| Chr4 | 3703259  | 3704314  | 4  | 1056 | 1.26501E-06 |
| Chr4 | 3710433  | 3712492  | 4  | 2060 | 3.66E-07    |
| Chr4 | 3785629  | 3787037  | 4  | 1409 | 4.54519E-06 |
| Chr4 | 3858609  | 3859938  | 4  | 1330 | 9.11503E-07 |
| Chr4 | 4186101  | 4188142  | 5  | 2042 | 3.96E-08    |
| Chr4 | 4244221  | 4244945  | 4  | 725  | 5.40654E-06 |
| Chr4 | 4245976  | 4247108  | 4  | 1133 | 0.000146683 |
| Chr4 | 4318677  | 4320004  | 4  | 1328 | 1.03773E-05 |
| Chr4 | 4487700  | 4491040  | 6  | 3341 | 2.88E-07    |
| Chr4 | 4555269  | 4557945  | 4  | 2677 | 5.06477E-06 |
| Chr4 | 4560230  | 4560796  | 4  | 567  | 2.65E-07    |
| Chr4 | 4564694  | 4566537  | 4  | 1844 | 1.61303E-05 |
| Chr4 | 4709680  | 4711404  | 4  | 1725 | 1.47113E-06 |
| Chr4 | 4719827  | 4721064  | 6  | 1238 | 5.17E-08    |
| Chr4 | 4764958  | 4765312  | 4  | 355  | 2.02E-08    |
| Chr4 | 4775426  | 4776391  | 4  | 966  | 2.05598E-06 |
| Chr4 | 4934877  | 4935148  | 4  | 272  | 0.000103867 |
| Chr4 | 5039255  | 5040845  | 4  | 1591 | 0.000183727 |
| Chr4 | 5065865  | 5067189  | 4  | 1325 | 6.78E-07    |
| Chr4 | 5204710  | 5206389  | 5  | 1680 | 2.97E-10    |
| Chr4 | 5400887  | 5401482  | 4  | 596  | 3.58834E-06 |
| Chr4 | 5510075  | 5510543  | 4  | 469  | 1.31E-08    |
| Chr4 | 5591933  | 5593374  | 4  | 1442 | 5.57E-07    |
| Chr4 | 5968650  | 5969468  | 4  | 819  | 5.83133E-06 |
| Chr4 | 6650782  | 6651625  | 8  | 844  | 4.44E-09    |
| Chr4 | 8900417  | 8901655  | 4  | 1239 | 6.20348E-06 |
| Chr4 | 9509207  | 9509985  | 4  | 779  | 1.68E-07    |
| Chr4 | 11036101 | 11039550 | 13 | 3450 | 5.76E-15    |
| Chr4 | 13329095 | 13331676 | 7  | 2582 | 5.43E-08    |
| Chr5 | 68081    | 69274    | 4  | 1194 | 7.40491E-06 |
| Chr5 | 2036593  | 2037500  | 10 | 908  | 3.13E-11    |
| Chr5 | 2374091  | 2375752  | 5  | 1662 | 1.20E-08    |
| Chr5 | 2393547  | 2396039  | 6  | 2493 | 3.30E-08    |
| Chr5 | 3253183  | 3253260  | 4  | 78   | 0.010457351 |
| Chr5 | 7027719  | 7029131  | 4  | 1413 | 6.06248E-06 |
| Chr5 | 8622173  | 8623566  | 5  | 1394 | 6.69E-09    |
| Chr5 | 9904566  | 9905353  | 4  | 788  | 3.40251E-06 |
| Chr5 | 10098793 | 10100846 | 4  | 2054 | 1.59679E-05 |
| Chr5 | 10379015 | 10379905 | 4  | 891  | 1.25516E-06 |
| Chr5 | 10583291 | 10583777 | 4  | 487  | 9.77E-07    |
| Chr5 | 10811826 | 10812455 | 4  | 630  | 0.000116283 |
| Chr5 | 10957581 | 10959444 | 5  | 1864 | 1.78E-08    |
| Chr5 | 11044680 | 11046869 | 6  | 2190 | 1.97E-07    |
| Chr5 | 11077864 | 11081771 | 10 | 3908 | 3.28E-12    |
| Chr5 | 11139315 | 11140147 | 5  | 833  | 3.11E-09    |
| Chr5 | 11151977 | 11152173 | 4  | 197  | 5.05E-07    |
| Chr5 | 11166438 | 11166464 | 4  | 27   | 1.63E-07    |
| Chr5 | 11171447 | 11172624 | 5  | 1178 | 4.97406E-05 |
| Chr5 | 11184856 | 11186019 | 6  | 1164 | 2.18158E-06 |
| Chr5 | 11198434 | 11199142 | 4  | 709  | 9.6534E-06  |
| Chr5 | 11391493 | 11392542 | 4  | 1050 | 6.20212E-05 |
| Chr5 | 11574951 | 11576014 | 5  | 1064 | 2.32E-08    |
| Chr5 | 11649276 | 11650870 | 5  | 1595 | 1.07421E-05 |
| Chr5 | 11708060 | 11709078 | 6  | 1019 | 8.40E-10    |

|      |          |          |    |      |             |
|------|----------|----------|----|------|-------------|
| Chr5 | 11906679 | 11908548 | 8  | 1870 | 2.84E-09    |
| Chr5 | 11939794 | 11942938 | 5  | 3145 | 4.55E-09    |
| Chr5 | 12009082 | 12011591 | 6  | 2510 | 3.59095E-06 |
| Chr5 | 12147203 | 12147875 | 4  | 673  | 2.17482E-05 |
| Chr5 | 12154171 | 12155200 | 4  | 1030 | 3.51472E-05 |
| Chr5 | 12241737 | 12243878 | 5  | 2142 | 3.20833E-06 |
| Chr5 | 12326891 | 12327492 | 6  | 602  | 5.93E-07    |
| Chr5 | 12368980 | 12370270 | 4  | 1291 | 1.12178E-05 |
| Chr5 | 12515260 | 12516331 | 5  | 1072 | 5.75E-08    |
| Chr5 | 12628865 | 12630048 | 5  | 1184 | 3.49248E-06 |
| Chr5 | 12762111 | 12762764 | 10 | 654  | 1.96E-12    |
| Chr5 | 12901605 | 12902548 | 4  | 944  | 2.07E-07    |
| Chr5 | 12925480 | 12927522 | 5  | 2043 | 2.30553E-06 |
| Chr5 | 12946403 | 12948062 | 4  | 1660 | 2.03763E-05 |
| Chr5 | 13002554 | 13005144 | 8  | 2591 | 1.06E-12    |
| Chr5 | 13173852 | 13175383 | 4  | 1532 | 1.01E-08    |
| Chr5 | 13348160 | 13349574 | 6  | 1415 | 9.32E-07    |
| Chr5 | 13374304 | 13375702 | 4  | 1399 | 0.000137944 |
| Chr5 | 14089567 | 14089707 | 4  | 141  | 1.91E-07    |
| Chr5 | 14147887 | 14148871 | 4  | 985  | 3.6923E-05  |
| Chr5 | 14558411 | 14559651 | 4  | 1241 | 1.85E-07    |
| Chr5 | 15357992 | 15359690 | 5  | 1699 | 1.28E-07    |
| Chr5 | 15921883 | 15924323 | 7  | 2441 | 9.23E-10    |
| Chr5 | 16702932 | 16704894 | 5  | 1963 | 1.18201E-06 |
| Chr5 | 17597710 | 17599669 | 4  | 1960 | 3.68E-07    |
| Chr5 | 19891078 | 19892230 | 5  | 1153 | 9.77E-08    |

## Supporting References

1. Wielopolska A, Townley H, Moore I, Waterhouse P, & Helliwell C (2005) A high-throughput inducible RNAi vector for plants. *Plant biotechnology journal* 3(6):583-590.
2. Martinez-Trujillo M, Limones-Briones V, Cabrera-Ponce J, & Herrera-Estrella L (2004) Improving transformation efficiency of *Arabidopsis thaliana* by modifying the floral dip method. *Plant Mol Biol Rep* 22(1):63-70.
3. Henderson IR & Jacobsen SE (2008) Tandem repeats upstream of the *Arabidopsis* endogene SDC recruit non-CG DNA methylation and initiate siRNA spreading. *Genes & development* 22(12):1597-1606.
4. Peterson D, Boehm K, & Stack S (1997) Isolation of milligram quantities of nuclear DNA from tomato (*Lycopersicon esculentum*), A plant containing high levels of polyphenolic compounds. *Plant Mol Biol Rep* 15(2):148-153.
5. Xiang H, *et al.* (2010) Single base-resolution methylome of the silkworm reveals a sparse epigenomic map. *Nature biotechnology* 28(5):516-520.
6. Lister R, *et al.* (2009) Human DNA methylomes at base resolution show widespread epigenomic differences. *Nature* 462(7271):315-322.
7. Langmead B & Salzberg SL (2012) Fast gapped-read alignment with Bowtie 2. *Nat Meth* 9(4):357-359.
8. Anders S, Pyl PT, & Huber W (2015) HTSeq—a Python framework to work with high-throughput sequencing data. *Bioinformatics* 31(2):166-169.
9. Robinson MD, McCarthy DJ, & Smyth GK (2010) edgeR: a Bioconductor package for differential expression analysis of digital gene expression data. *Bioinformatics* 26(1):139-140.
10. Katari MS, *et al.* (2010) VirtualPlant: a software platform to support systems biology research. *Plant physiology* 152(2):500-515.
11. Lyons E & Freeling M (2008) How to usefully compare homologous plant genes and chromosomes as DNA sequences. *The Plant Journal* 53(4):661-673.
